# Supplementary material for: Density separation of petrous bone powders for optimized ancient DNA yields
Source: HighWire-hosted journal article supplement (doi:10.1101/gr.277714.123), 2023-04-01
Supplement: Supplementary_Tables_S1-S6.xlsx [file Supplementary_Tables_S1-S6.xlsx]

## Sheet: SuppTableS1
Supplementary Table S1: Summary results and authenticity metrics for each individual sequenced library, and for the merged 2 best SPT intervals and standard extraction. Filtering options and metric calculations shown below column titles. Italic merged lines denote best SPT intervals.
Sample ID	Site	Archaeological ID	Archaeological Period	Density Interval	Sequencing ID	Sequencing Group (1=initial sequencing data; 2=extra sequencing of 2 best intervals and standard)	Total reads	Trimmed reads	Aligned Reads	%Endogenous (before duplicate removal)	Unique reads	%Endogenous unique (duplicates removed)	%GC (unique reads)	Genomic coverage	MT coverage	Average length	Non-Normalized % Duplication rate	Contamination % via hapCon from Huang & Ringbauer (2023)	Deamination Frequency 5'	Deamination Frequency 3'	Molecular Sex Assignment via ry_compute from Skoglund et al. (2013)	Ry_compute output from Skoglund et al. (2013)
								-O 1, -m 18	-l 1000, -q 30, -F 4	(Aligned reads / Total reads) × 100		(Unique reads / Total reads) × 100					[(Aligned reads - Unique reads) / Aligned reads] × 100	(95% CI) - Number of used SNPs				(number of ChrY reads / total ChrX+ChrY reads)
1970	Praha 5 - Jinonice, Czech Republic	Jinonice gr. 18, P7A-16113	Iron Age	Below 2.15	194591	1	5532636	3921331	332669	6.01285	122763	2.22	39	0.0020×	0.1764×	51	63.0976	N/A (too few data)	0.35	0.35	XY	Ry=0.0894 with 95% CI:0.0799-0.0989 (ChrY:310/3467)
				2.2	194592	1	6994954	5677764	862167	12.3256	577613	8.26	38	0.0090×	0.8164×	48	33.0045	12.79 (2.44 - 23.14) - 870	0.42	0.41	XY	Ry=0.08465 with 95% CI:0.0803-0.089 (ChrY:1350/15951)
				2.25	194593	1	7717018	5823617	1079025	13.9824	786440	10.19	37	0.0134×	0.9934×	52	27.1157	2.20 (-2.05 - 6.45) - 1313	0.38	0.37	XY	Ry=0.08805 with 95% CI:0.0843-0.0918 (ChrY:1921/21810)
				2.3	194594	1	6687139	5666046	1328700	19.8695	858109	12.83	37	0.0138×	1.0764×	49	35.4174	4.88 (0.10 - 9.66) - 1344	0.41	0.39	XY	Ry=0.0846 with 95% CI:0.0811-0.0881 (ChrY:2074/24516)
				2.35	194595	1	7048918	6372465	1541141	21.8635	1249678	17.73	39	0.0200×	1.9255×	49	18.9122	1.60 (-0.91 - 4.12) - 1954	0.42	0.4	XY	Ry=0.085 with 95% CI:0.0821-0.0879 (ChrY:2985/35108)
					210410	2	20158935	18150022	4323511	21.4471	2542725	12.61	38	0.0408×	3.5181×	49	41.1884	4.86 (2.89 - 6.82) - 4007	0.42	0.4	XY	Ry=0.0866 with 95% CI:0.0845-0.0887 (ChrY:6186/71423)
				2.4	194596	1	4901760	4519431	1404194	28.6467	1161308	23.69	38	0.0191×	2.0930×	51	17.2972	4.26 (1.04 - 7.49) - 1871	0.44	0.41	XY	Ry=0.08655 with 95% CI:0.0835-0.0896 (ChrY:2852/32960)
					210411	2	4881966	4489679	1403712	28.753	914336	18.73	37	0.0152×	1.7572×	51	34.863	2.60 (-1.59 - 6.78) - 1442	0.44	0.42	XY	Ry=0.0876 with 95% CI:0.0841-0.0911 (ChrY:2250/25683)
					210239	2	3215927	2999431	936270	29.1135	751914	23.38	37	0.0124×	1.3029×	51	19.6905	4.06 (-1.19 - 9.31) - 1180	0.44	0.41	XY	Ry=0.08815 with 95% CI:0.0843-0.092 (ChrY:1863/21131)
				2.45	204138	1	4696488	4012696	811573	17.2804	675167	14.376	39	0.0097×	1.0192×	44	16.8076	2.76 (-4.91 - 10.43) - 907	0.3755	0.3651	XY	Ry=0.0833 with 95% CI:0.0793-0.0873 (ChrY:1535/18435)
				Above 2.45	204134	1	10084457	8397550	887470	8.80037	751477	7.45183	38	0.0109×	1.2576×	45	15.3237	2.95 (-3.01 - 8.91) - 1024	0.3608	0.3541	XY	Ry=0.0853 with 95% CI:0.0815-0.0891 (ChrY:1769/20736)
				Standard	194598	1	8633655	6173294	571054	6.61428	490054	5.68	38	0.0083×	0.8975×	52	14.1843	N/A (too few data)	0.4	0.38	XY	Ry=0.08835 with 95% CI:0.0836-0.0931 (ChrY:1221/13820)
					210412	2	18953402	13289184	1205100	6.35823	804854	4.25	38	0.0136×	1.5103×	52	33.2127	7.65 (1.06 - 14.24) - 134	0.4	0.38	XY	Ry=0.0832 with 95% CI:0.0796-0.0868 (ChrY:1876/22544)
					210240	2	13314971	9823597	920929	6.91649	757083	5.69	38	0.0128×	1.3531×	52	17.7914	4.36 (-1.09 - 9.82) - 1230	0.4	0.38	XY	Ry=0.08715 with 95% CI:0.0834-0.0909 (ChrY:1852/21252)
				2.35_Merged	-	-	27207853	24522487	5864652	21.555	3565283	13.1039	38	0.0570×	4.9138×	49	39.2073	3.70 (2.17 - 5.24) - 5535	0.42	0.4	XY	Ry=0.08615 with 95% CI:0.0844-0.0879 (ChrY:8630/100164)
				2.40_Merged	-	-	12999653	12008541	3744176	28.8021	2698313	20.7568	37	0.0445×	4.6910×	51	27.9331	2.81 (1.14 - 4.48) - 4264	0.44	0.41	XY	Ry=0.0869 with 95% CI:0.0849-0.0889 (ChrY:6617/76162)
				Standard_Merged	-	-	40902028	29286075	2697083	6.59401	2032929	4.97024	38	0.0343×	3.5621×	52	24.6249	4.79 (2.42 - 7.16) - 3318	0.4	0.38	XY	Ry=0.0858 with 95% CI:0.0835-0.0881 (ChrY:4902/57125)
2338	Praha 5 - Malà Ohrada, Czech Republic	Malá Ohrada gr. 25, P7A-38770	Early Bronze Age	Below 2.15	194599	1	4119762	3315539	200105	4.8572	111453	2.71	38	0.0017×	0.1954×	47	44.3027	N/A (too few data)	0.33	0.32	Consistent with XY but not XX	Ry=0.4007 with 95% CI:0.0711-0.0904 (ChrY:249/3083)
				2.2	194600	1	5082905	4104334	159629	3.14051	24187	0.48	39	0.0004×	0.0340×	48	84.848	N/A (too few data)	0.29	0.28	Consistent with XY but not XX	Ry=0.06785 with 95% CI:0.0489-0.0868 (ChrY:46/678)
				2.25	194601	1	6338328	5053278	1416584	22.3495	480430	7.58	38	0.0076×	0.7262×	49	66.0853	0.00 (-7.86 - 7.86) - 755	0.33	0.32	Consistent with XY but not XX	Ry=0.07945 with 95% CI:0.0749-0.084 (ChrY:1069/13457)
				2.3	194602	1	6836651	6355256	3907400	57.1537	1783820	26.09	38	0.0305×	1.9663×	52	54.3476	1.68 (0.03 - 3.32) - 3013	0.35	0.34	XY	Ry=0.0835 with 95% CI:0.0811-0.0859 (ChrY:4185/50128)
				2.35	194603	1	6531258	5973161	3483284	53.3325	2659459	40.72	37	0.0444×	3.1346×	51	23.6508	1.83 (0.32 - 3.35) - 4349	0.36	0.34	XY	Ry=0.08385 with 95% CI:0.0819-0.0858 (ChrY:6336/75556)
					210413	2	16580361	15087967	8812885	53.1526	4742255	28.6	37	0.0791×	5.4209×	51	46.1895	2.30 (1.31 - 3.29) - 7744	0.36	0.34	XY	Ry=0.0842 with 95% CI:0.0827-0.0857 (ChrY:11264/133833)
				2.4	194604	1	7421646	6631839	3516246	47.3783	2591691	34.92	37	0.0424×	3.3548×	50	26.2938	3.20 (1.64 - 4.76) - 4198	0.36	0.35	XY	Ry=0.0838 with 95% CI:0.0818-0.0858 (ChrY:6205/74024)
					210414	2	18405077	16334281	8656413	47.0327	4409711	23.96	37	0.0720×	5.3108×	50	49.0584	2.70 (1.57 - 3.83) - 7095	0.36	0.35	XY	Ry=0.08485 with 95% CI:0.0833-0.0864 (ChrY:10723/126390)
				2.45	204135	1	4060547	3213354	567607	13.9786	468416	11.5358	38	0.0072×	0.7381×	47	17.4753	0.00 (-6.92 - 6.92) - 651	0.327	0.3145	XY	Ry=0.0806 with 95% CI:0.0759-0.0853 (ChrY:1030/12779)
				Above 2.45	204132	1	4916028	3693046	312647	6.35975	261119	5.31158	37	0.0040×	0.2984×	47	16.4812	N/A (too few data)	0.3265	0.3193	XY	Ry=0.08185 with 95% CI:0.0756-0.0881 (ChrY:602/7354)
				Standard	194606	1	8617501	6114755	535989	6.21977	449411	5.22	37	0.0078×	0.5869×	53	16.1529	0.00 (-5.88 - 5.88) - 776	0.35	0.33	XY	Ry=0.0813 with 95% CI:0.0766-0.086 (ChrY:1038/12768)
					210415	2	18229648	12641127	1084529	5.94926	700032	3.84	37	0.0122×	0.8754×	53	35.4529	3.27 (-0.44 - 6.98) - 1183	0.35	0.33	XY	Ry=0.08425 with 95% CI:0.0804-0.0881 (ChrY:1676/19885)
					206545	2	18357366	13230690	1198359	6.52795	1040364	5.67	36	0.0181×	1.2801×	53	13.1843	0.18 (-2.38 - 2.73) - 1747	0.35	0.33	XY	Ry=0.08445 with 95% CI:0.0813-0.0876 (ChrY:2513/29770)
				2.35_Merged	-	-	23111619	21061128	12296169	53.2034	6595194	28.5363	37	0.1094×	7.3870×	51	46.3638	2.82 (1.93 - 3.70) - 10577	0.36	0.34	XY	Ry=0.08375 with 95% CI:0.0825-0.085 (ChrY:15620/186460)
				2.40_Merged	-	-	25826723	22966120	12172659	47.132	6047206	23.4145	37	0.0981×	7.1884×	50	50.3214	2.68 (1.75 - 3.61) - 9610	0.36	0.35	XY	Ry=0.0842 with 95% CI:0.0829-0.0855 (ChrY:14561/172907)
				Standard_Merged	-	-	45204515	31986572	2818877	6.23583	2183629	4.83056	37	0.0379×	2.6898×	53	22.5355	2.11 (0.44 - 3.77) - 3661	0.35	0.33	XY	Ry=0.08375 with 95% CI:0.0816-0.0859 (ChrY:5215/62281)
2909	Praha 5 - Jinonice, Czech Republic	Jinonice gr. 27, P7A-16119	Iron Age	Below 2.15	194607	1	5988125	3660261	208733	3.48578	138223	2.31	37	0.0021×	0.2415×	47	33.78	50.00 (-36.74 - 136.74) - 226	0.37	0.37	Consistent with XY but not XX	Ry=0.0817 with 95% CI:0.073-0.0904 (ChrY:310/3793)
				2.2	194608	1	5344268	3945471	264242	4.9444	89334	1.67	37	0.0014×	0.2079×	49	66.1924	N/A (too few data)	0.38	0.38	Consistent with XY but not XX	Ry=0.08435 with 95% CI:0.0736-0.0951 (ChrY:216/2560)
				2.25	194609	1	6087549	3984108	690448	11.342	434959	7.15	37	0.0071×	0.7645×	50	37.0034	10.99 (-0.69 - 22.68) - 735	0.38	0.37	XY	Ry=0.0846 with 95% CI:0.0797-0.0895 (ChrY:1049/12405)
				2.3	194610	1	5708576	4538646	1666897	29.1999	1108681	19.42	37	0.0181×	1.2747×	50	33.4883	0.00 (-1.92 - 1.92) - 1782	0.38	0.38	XY	Ry=0.08495 with 95% CI:0.0819-0.088 (ChrY:2697/31745)
				2.35	194611	1	6303792	5483875	2710078	42.9912	2109902	33.47	37	0.0349×	2.2818×	51	22.1461	3.58 (1.36 - 5.81) - 3362	0.41	0.4	XY	Ry=0.08455 with 95% CI:0.0823-0.0868 (ChrY:5046/59666)
					210416	2	13296978	11437205	5638124	42.4015	3249385	24.44	37	0.0539×	3.4202×	51	42.3676	1.76 (0.57 - 2.96) - 5214	0.41	0.4	XY	Ry=0.0876 with 95% CI:0.0858-0.0894 (ChrY:8102/92470)
				2.4	194612	1	5541680	4938214	2160972	38.9949	1111905	20.06	36	0.0166×	1.2724×	46	48.5461	2.63 (-0.64 - 5.91) - 1604	0.34	0.3	XY	Ry=0.0822 with 95% CI:0.0792-0.0852 (ChrY:2578/31365)
				2.45	204129	1	5531905	4875156	1504877	27.2036	1265577	22.8778	37	0.0184×	1.6350×	44	15.9016	3.70 (0.54 - 6.87) - 1843	0.3541	0.349	XY	Ry=0.08465 with 95% CI:0.0817-0.0876 (ChrY:2965/35026)
					210417	2	16810011	14866727	4602598	27.3801	3061656	18.21	37	0.0445×	3.5697×	44	33.4798	3.50 (1.85 - 5.14) - 4225	0.36	0.35	XY	Ry=0.08285 with 95% CI:0.081-0.0847 (ChrY:6987/84344)
				Above 2.45	204128	1	6719863	5389570	771899	11.4868	646772	9.62478	37	0.0093×	0.8918×	44	16.2103	3.77 (-5.04 - 12.57) - 868	0.3604	0.3525	XY	Ry=0.08375 with 95% CI:0.0797-0.0878 (ChrY:1492/17814)
				Standard	194614	1	6481420	5046826	670628	10.3469	560183	8.64	37	0.0091×	0.6711×	50	16.4689	4.94 (-3.34 - 13.23) - 863	0.37	0.37	XY	Ry=0.0866 with 95% CI:0.0822-0.091 (ChrY:1350/15594)
					210418	2	13748806	10578619	1381276	10.0465	880584	6.4	37	0.0143×	1.0308×	50	36.2485	3.86 (-0.81 - 8.52) - 1398	0.37	0.37	XY	Ry=0.08755 with 95% CI:0.084-0.0911 (ChrY:2147/24531)
				2.35_Merged	-	-	19600770	16921080	8348202	42.5912	4836166	24.6733	37	0.0797×	4.9095×	51	42.0694	2.79 (1.68 - 3.91) - 7602	0.41	0.41	XY	Ry=0.08595 with 95% CI:0.0845-0.0874 (ChrY:11804/137325)
				2.45_Merged	-	-	22341916	19741883	6107475	27.3364	4302730	19.2586	37	0.0625×	4.9657×	44	29.5498	3.55 (2.22 - 4.88) - 5989	0.35	0.35	XY	Ry=0.08325 with 95% CI:0.0817-0.0848 (ChrY:9880/118693)
				Standard_Merged	-	-	20230226	15625445	2051904	10.1428	1439090	7.11356	37	0.0233×	1.6832×	50	29.8656	2.69 (-0.03 - 5.40) - 2256	0.37	0.37	XY	Ry=0.08705 with 95% CI:0.0843-0.0898 (ChrY:3490/40092)
2910	Praha 5 - Jinonice, Czech Republic	Jinonice gr. 35, P7A-16122	Iron Age	Below 2.15	194575	1	5329042	3993431	114430	2.14729	65269	1.22	41	0.0011×	0.1153×	51	42.9616	7.68 (-0.32 - 15.68) - 661	0.28	0.26	XY	Ry=0.0896 with 95% CI:0.0761-0.1031 (ChrY:154/1718)
				2.2	194576	1	7856551	6048735	452815	5.76353	78048	0.99	40	0.0012×	0.1382×	47	82.7638	N/A (too few data)	0.32	0.31	Consistent with XY but not XX	Ry=0.086 with 95% CI:0.0743-0.0977 (ChrY:190/2210)
				2.25	194577	1	7147504	5223275	703604	9.84405	191119	2.67	41	0.0031×	0.3268×	50	72.8371	50.00 (-12.06 - 112.06) - 275	0.3	0.29	XY	Ry=0.09125 with 95% CI:0.0834-0.0991 (ChrY:470/5150)
				2.3	194578	1	8283251	6466583	2253515	27.2057	1560048	18.83	40	0.0266×	2.5032×	52	30.7727	2.61 (0.55 - 4.66) - 2499	0.31	0.29	XY	Ry=0.0888 with 95% CI:0.0861-0.0915 (ChrY:3763/42389)
				2.35	194579	1	6618688	5605328	2454554	37.0852	1935917	29.25	40	0.0333×	3.1295×	53	21.1296	2.07 (0.27 - 3.88) - 3164	0.31	0.29	XY	Ry=0.0868 with 95% CI:0.0844-0.0892 (ChrY:4596/52936)
					210419	2	18225701	15241563	6585091	36.1308	3706160	20.33	40	0.0640×	5.7470×	53	43.7189	3.40 (2.08 - 4.71) - 6142	0.31	0.29	XY	Ry=0.0866 with 95% CI:0.0849-0.0883 (ChrY:8832/102006)
				2.4	194580	1	5423607	4769015	2092492	38.5812	1690950	31.18	39	0.0287×	2.7922×	52	19.1897	3.07 (0.88 - 5.26) - 2679	0.32	0.3	XY	Ry=0.0884 with 95% CI:0.0858-0.091 (ChrY:4127/46674)
					210420	2	13643591	11886762	5215902	38.2297	3134631	22.98	39	0.0535×	5.3593×	52	39.9024	1.48 (0.27 - 2.68) - 5116	0.32	0.3	XY	Ry=0.0872 with 95% CI:0.0853-0.0891 (ChrY:7516/86199)
				2.45	204133	1	11553250	9598197	2396826	20.7459	1966621	17.0222	39	0.0307×	3.4799×	48	17.9489	2.34 (0.23 - 4.44) - 2838	0.294	0.2863	XY	Ry=0.08555 with 95% CI:0.0832-0.0879 (ChrY:4644/54272)
				Above 2.45	204131	1	8640295	7183033	986179	11.4137	852681	9.86866	39	0.0128×	1.2799×	46	13.5369	7.37 (1.71 - 13.03) - 1156	0.2823	0.2753	XY	Ry=0.0835 with 95% CI:0.0799-0.0871 (ChrY:1931/23125)
				Standard	194582	1	6963411	5023673	443799	6.3733	375512	5.39	40	0.0068×	0.5805×	56	15.3869	N/A (too few data)	0.29	0.27	XY	Ry=0.09215 with 95% CI:0.0866-0.0977 (ChrY:958/10392)
					210421	2	19585391	13944159	1223274	6.24585	794176	4.05	40	0.0146×	1.3071×	56	35.0778	2.14 (-1.23 - 5.51) - 1445	0.29	0.27	XY	Ry=0.0888 with 95% CI:0.085-0.0926 (ChrY:1951/21971)
				2.35_Merged	-	-	24844389	20846891	9039645	36.3851	5304561	21.3511	40	0.0913×	8.0773×	53	41.3189	2.88 (1.88 - 3.87) - 8655	0.31	0.29	XY	Ry=0.0865 with 95% CI:0.0851-0.0879 (ChrY:12598/145635)
				2.40_Merged	-	-	19067198	16655777	7308394	38.3297	4596587	24.1073	39	0.0783×	7.5018×	52	37.1054	1.72 (0.75 - 2.68) - 7383	0.32	0.3	XY	Ry=0.08745 with 95% CI:0.0859-0.089 (ChrY:11064/126578)
				Standard_Merged	-	-	26548802	18967832	1667073	6.27928	1167997	4.39943	40	0.0214×	1.8626×	56	29.9373	2.00 (-0.47 - 4.47) - 2099	0.29	0.27	XY	Ry=0.0899 with 95% CI:0.0868-0.093 (ChrY:2905/32318)
P9883	Castel Sozzio, Italy	Tomb 15, Cranio V	Late Antiquity / Early Medieval	Below 2.15	194583	1	8183133	6452580	140508	1.71704	78500	0.96	39	0.0014×	0.0971×	55	44.1313	N/A (too few data)	0.27	0.26	Consistent with XY but not XX	Ry=0.082 with 95% CI:0.0706-0.0934 (ChrY:182/2219)
				2.2	194584	1	5506379	4212810	206365	3.74774	82476	1.5	39	0.0014×	0.1030×	52	60.0339	N/A (too few data)	0.27	0.26	Consistent with XY but not XX	Ry=0.0843 with 95% CI:0.0732-0.0954 (ChrY:203/2408)
				2.25	194585	1	6144251	5071719	644584	10.4908	361606	5.89	40	0.0066×	0.5662×	56	43.9009	9.59 (-2.16 - 21.34) - 616	0.32	0.31	XY	Ry=0.08785 with 95% CI:0.0823-0.0934 (ChrY:879/10006)
				2.3	194586	1	4061429	3708445	1760868	43.3559	1353035	33.31	39	0.0242×	1.8607×	55	23.1609	1.66 (-0.90 - 4.23) - 2319	0.36	0.35	XY	Ry=0.08535 with 95% CI:0.0825-0.0882 (ChrY:3163/37066)
				2.35	194587	1	6408628	5871691	3391874	52.9267	2800159	43.69	39	0.0534×	4.1016×	58	17.4451	2.70 (1.23 - 4.17) - 5131	0.32	0.29	XY	Ry=0.0882 with 95% CI:0.0862-0.0902 (ChrY:6874/77932)
					210422	2	17862763	16271152	9506342	53.2188	5840984	32.7	39	0.1120×	8.4569×	59	38.557	2.78 (1.88 - 3.67) - 10681	0.32	0.3	XY	Ry=0.08675 with 95% CI:0.0854-0.0881 (ChrY:14178/163444)
				2.4	194588	1	6617694	6085965	3317257	50.1271	2791261	42.18	39	0.0533×	5.1900×	59	15.8564	3.69 (2.16 - 5.23) - 5090	0.35	0.32	XY	Ry=0.0888 with 95% CI:0.0868-0.0908 (ChrY:6898/77692)
					210423	2	15539225	14244101	7817261	50.3066	5062446	32.58	39	0.0970×	8.9742×	59	35.2402	2.72 (1.75 - 3.70) - 9241	0.35	0.33	XY	Ry=0.08625 with 95% CI:0.0848-0.0877 (ChrY:12151/140919)
				2.45	204127	1	7743982	6865950	2320288	29.9625	1966427	25.393	39	0.0332×	3.5283×	52	15.2507	2.76 (0.79 - 4.73) - 3258	0.316	0.3004	XY	Ry=0.08435 with 95% CI: 0.082-0.0867 (ChrY:4550/53926)
				Above 2.45	204130	1	6948495	6106369	1119442	16.1106	925607	13.321	39	0.0149×	1.3259×	50	17.3153	0.70 (-2.75 - 4.16) - 1432	0.282	0.2376	XY	Ry=0.08715 with 95% CI:0.0837-0.0906 (ChrY:2233/25616)
				Standard	194590	1	6255053	4768470	1141454	18.2485	945567	15.12	38	0.0186×	1.2677×	60	17.1612	0.20 (-1.52 - 1.93) - 1877	0.31	0.28	XY	Ry=0.0876 with 95% CI:0.0842-0.091 (ChrY:2329/26583)
					210424	2	14920684	11269277	2715715	18.201	1695029	11.36	38	0.0334×	2.2394×	61	37.5844	0.86 (-0.49 - 2.22) - 3344	0.31	0.28	XY	Ry=0.0895 with 95% CI:0.0869-0.0921 (ChrY:4230/47259)
					206546	2	10109523	7769153	1886880	18.6644	1593539	15.76	38	0.0315×	2.1768×	61	15.5464	0.70 (-0.89 - 2.29) - 3046	0.31	0.28	XY	Ry=0.08585 with 95% CI:0.0833-0.0884 (ChrY:3868/45059)
				2.35_Merged	-	-	24271391	22142843	12898216	53.1416	8478083	34.9304	39	0.1621×	11.8583×	59	34.2693	2.76 (2.05 - 3.46) - 15218	0.32	0.3	XY	Ry=0.08695 with 95% CI:0.0858-0.0881 (ChrY:20608/236926)
				2.40_Merged	-	-	22156919	20330066	11134518	50.253	7787054	35.145	39	0.1489×	13.3948×	59	30.0638	3.09 (2.32 - 3.86) - 13978	0.35	0.33	XY	Ry=0.087 with 95% CI:0.0858-0.0882 (ChrY:18868/216875)
				Standard_Merged	-	-	31285260	23806900	5744049	18.3602	4226722	13.5103	38	0.0833×	5.4803×	61	26.4156	1.30 (0.44 - 2.15) - 8115	0.31	0.28	XY	Ry=0.0877 with 95% CI:0.0861-0.0893 (ChrY:10413/118781)
P9884	Castel Sozzio, Italy	Tomb 27	Late Antiquity / Early Medieval	Below 2.15	194631	1	6288876	5031308	243773	3.87626	194946	3.1	38	0.0036×	0.7060×	56	20.0297	N/A (too few data)	0.29	0.26	XY	Ry=0.0874 with 95% CI:0.08-0.0948 (ChrY:490/5606)
				2.2	194632	1	6047040	4672501	300989	4.97746	240424	3.98	38	0.0045×	0.6460×	58	20.122	N/A (too few data)	0.29	0.27	XY	Ry=0.08735 with 95% CI:0.0806-0.0941 (ChrY:588/6731)
				2.25	194633	1	6207466	4842921	243197	3.91781	198290	3.19	38	0.0037×	0.5689×	57	18.4653	19.23 (-16.07 - 54.53) - 396	0.29	0.26	Consistent with XY but not XX	Ry=0.0803 with 95% CI:0.0733-0.0873 (ChrY:464/5776)
				2.3	194634	1	6473669	5282051	761208	11.7585	634552	9.8	38	0.0119×	2.0170×	57	16.6388	16.91 (8.00 - 25.82) - 1125	0.31	0.28	XY	Ry=0.08845 with 95% CI:0.0843-0.0926 (ChrY:1603/18117)
				2.35	194635	1	5886941	5202313	1397880	23.7454	1193250	20.27	38	0.0220×	2.7954×	56	14.6386	4.48 (1.35 - 7.60) - 2174	0.31	0.29	XY	Ry=0.0854 with 95% CI:0.0824-0.0884 (ChrY:2883/33764)
				2.4	194636	1	6624378	6117637	2562109	38.677	2148254	32.43	38	0.0400×	5.0559×	57	16.1529	3.67 (1.75 - 5.59) - 3948	0.31	0.28	XY	Ry=0.0854 with 95% CI:0.0832-0.0876 (ChrY:5199/60885)
					210425	2	16885697	15514676	6566999	38.8909	4197227	24.86	38	0.0788×	9.4137×	58	36.0861	3.40 (2.22 - 4.59) - 7627	0.31	0.28	XY	Ry=0.0876 with 95% CI:0.086-0.0892 (ChrY:10462/119411)
				2.45	204147	1	8327546	7383198	3626622	43.5497	2953879	35.4712	39	0.0607×	11.8927×	63	18.5501	3.37 (1.99 - 4.76) - 5958	0.3077	0.2651	XY	Ry=0.09005 with 95% CI:0.0881-0.092 (ChrY:7530/83625)
					210426	2	21723034	19247495	9549911	43.9621	5900086	27.16	39	0.1209×	21.9333×	63	38.2184	3.88 (2.91 - 4.85) - 11708	0.31	0.27	XY	Ry=0.08945 with 95% CI:0.0881-0.0908 (ChrY:14994/167658)
				Above 2.45	204161	1	9433867	8484247	2827832	29.9753	2320782	24.6005	39	0.0455×	7.4463×	60	17.9307	2.14 (0.64 - 3.65) - 4563	0.3271	0.2905	XY	Ry=0.0892 with 95% CI:0.087-0.0914 (ChrY:5889/66005)
				Standard	194638	1	8830352	7302409	2197325	24.8838	1784090	20.2	38	0.0366×	6.6072×	63	18.8063	3.17 (1.16 - 5.17) - 3609	0.31	0.27	XY	Ry=0.08705 with 95% CI:0.0846-0.0895 (ChrY:4431/50891)
					210427	2	21006251	17157769	5263311	25.0559	3144571	14.97	38	0.0650×	10.9781×	63	40.2549	2.37 (1.09 - 3.65) - 6398	0.31	0.27	XY	Ry=0.08865 with 95% CI:0.0868-0.0905 (ChrY:7988/90073)
				2.40_Merged	-	-	23510075	21632313	9129108	38.8306	6315586	26.8633	38	0.1183×	13.7284×	57	30.8192	3.60 (2.64 - 4.55) - 11335	0.31	0.28	XY	Ry=0.0868 with 95% CI:0.0855-0.0881 (ChrY:15582/179524)
				2.45_Merged	-	-	30050580	26630693	13176533	43.8478	8833866	29.3967	39	0.1812×	30.8385×	63	32.9576	4.09 (3.32 - 4.86) - 17235	0.31	0.27	XY	Ry=0.0896 with 95% CI:0.0885-0.0907 (ChrY:22470/250823)
				Standard_Merged	-	-	29836603	24460178	7460636	25.005	4922761	16.4991	38	0.1015×	16.7003×	63	34.0169	2.51 (1.55 - 3.47) - 9869	0.31	0.27	XY	Ry=0.08805 with 95% CI:0.0866-0.0895 (ChrY:12401/140845)
P9892	Castel Sozzio, Italy	Tomb 19A	Late Antiquity / Early Medieval	Below 2.15	194639	1	6742589	4975392	886598	13.1492	675070	10.01	38	0.0110×	0.5821×	50	23.8584	1.01 (-4.39 - 6.40) - 1065	0.29	0.26	XY	Ry=0.08125 with 95% CI:0.0774-0.0851 (ChrY:1541/18967)
				2.2	194640	1	5111485	3630992	452065	8.8441	245112	4.8	38	0.0040×	0.2413×	50	45.7795	41.80 (3.45 - 80.15) - 425	0.28	0.26	Consistent with XY but not XX	Ry=0.0805 with 95% CI:0.074-0.087 (ChrY:540/6709)
				2.25	194641	1	8627423	8004415	4155279	48.1636	3318554	38.47	38	0.0508×	2.6910×	47	20.1364	2.02 (0.61 - 3.42) - 4761	0.3	0.29	XY	Ry=0.0819 with 95% CI:0.0801-0.0837 (ChrY:7422/90654)
				2.3	194642	1	6696418	6271318	3428201	51.1945	2897886	43.28	38	0.0464×	2.7750×	49	15.4692	2.16 (0.66 - 3.67) - 4294	0.3	0.29	XY	Ry=0.08305 with 95% CI:0.0811-0.085 (ChrY:6586/79298)
				2.35	194643	1	5755366	5378243	3016973	52.4202	2496235	43.37	38	0.0411×	2.7834×	50	17.2603	1.89 (0.32 - 3.45) - 3853	0.3	0.29	XY	Ry=0.0839 with 95% CI:0.0818-0.086 (ChrY:5732/68322)
					210428	2	18182243	16936512	9543335	52.4871	5938772	32.66	38	0.0984×	5.9551×	51	37.7705	2.39 (1.47 - 3.31) - 9230	0.3	0.29	XY	Ry=0.08295 with 95% CI:0.0816-0.0843 (ChrY:13618/164130)
				2.4	194644	1	6435285	6087076	3536520	54.9551	2996052	46.56	38	0.0494×	3.1401×	51	15.2825	2.35 (0.84 - 3.85) - 4567	0.31	0.3	XY	Ry=0.08395 with 95% CI:0.0821-0.0858 (ChrY:6951/82793)
					210429	2	16155507	15245817	8905261	55.1221	5892583	36.47	38	0.0980×	5.9868×	51	33.8303	3.02 (2.03 - 4.01) - 9245	0.31	0.3	XY	Ry=0.08475 with 95% CI:0.0834-0.0861 (ChrY:13885/163764)
				2.45	204148	1	4717930	4124221	1502388	31.8442	1261563	26.7398	38	0.0202×	1.3697×	49	16.0295	1.37 (-1.21 - 3.94) - 1962	0.2899	0.2873	XY	Ry=0.0851 with 95% CI:0.0822-0.088 (ChrY:2981/35027)
				Above 2.45	204157	1	1777791	900361	3115	0.175217	2092	0.117674	47	Below 0.0001×	0.0019×	47	32.8411	N/A (too few data)	0.1431	0.131	Not Assigned	Ry=0.03845 with 95% CI:-0.0138-0.0907 (ChrY:2/52)
				Standard	194646	1	6242009	5128501	1628675	26.0922	1389635	22.26	37	0.0230×	1.2442×	51	14.677	2.49 (-0.40 - 5.38) - 2109	0.29	0.28	XY	Ry=0.08505 with 95% CI:0.0823-0.0878 (ChrY:3274/38500)
					210430	2	16033295	12995598	4107434	25.6182	2718305	16.95	37	0.0452×	2.3333×	51	33.8199	2.65 (1.01 - 4.30) - 4274	0.29	0.28	XY	Ry=0.0832 with 95% CI:0.0812-0.0852 (ChrY:6257/75222)
				2.35_Merged	-	-	23937609	22314755	12560308	52.471	8389229	35.0462	38	0.1387×	8.2873×	51	33.2084	2.60 (1.83 - 3.37) - 12775	0.3	0.29	XY	Ry=0.08315 with 95% CI:0.082-0.0843 (ChrY:19228/231265)
				2.40_Merged	-	-	22590792	21332893	12441781	55.0746	8844727	39.1519	38	0.1466×	8.6659×	51	28.9111	2.75 (2.00 - 3.51) - 13495	0.31	0.3	XY	Ry=0.0844 with 95% CI:0.0833-0.0855 (ChrY:20717/245495)
				Standard_Merged	-	-	22275304	18124099	5736109	25.751	4104152	18.4247	37	0.0681×	3.4892×	51	28.4506	2.62 (1.41 - 3.82) - 6512	0.29	0.28	XY	Ry=0.0837 with 95% CI:0.0821-0.0853 (ChrY:9511/113642)
P9895	Castel Sozzio, Italy	Tomb 16	Late Antiquity / Early Medieval	Below 2.15	194615	1	6497906	5474524	1045823	16.0948	611868	9.42	39	0.0099×	1.3239×	49	41.4941	N/A (female)	0.33	0.32	XX	Ry=0.0047 with 95% CI:0.0039-0.0055 (ChrY:143/30422)
				2.2	194616	1	6731973	5535205	1282700	19.0538	400087	5.94	38	0.0066×	0.8320×	50	68.809	N/A (female)	0.33	0.32	XX	Ry=0.0043 with 95% CI:0.0034-0.0052 (ChrY:85/19911)
				2.25	194617	1	6245549	5343794	846826	13.5589	546195	8.75	40	0.0099×	1.3003×	56	35.5009	N/A (female)	0.27	0.26	XX	Ry=0.0049 with 95% CI:0.0041-0.0057 (ChrY:130/26552)
				2.3	194618	1	6349149	5788526	2096679	33.023	1719268	27.08	39	0.0313×	3.8243×	56	18.0004	N/A (female)	0.32	0.3	XX	Ry=0.004 with 95% CI:0.0036-0.0044 (ChrY:343/85269)
				2.35	194619	1	5357216	4929750	2468462	46.0773	2087032	38.96	39	0.0393×	4.6836×	58	15.4521	N/A (female)	0.31	0.29	XX	Ry=0.00375 with 95% CI:0.0034-0.0041 (ChrY:390/103808)
					210431	2	13287027	12156334	6154447	46.3192	4014425	30.21	39	0.0759×	8.7241×	58	34.772	N/A (female)	0.31	0.29	XX	Ry=0.00375 with 95% CI:0.0035-0.004 (ChrY:757/200936)
				2.4	194620	1	4662511	4399910	2467777	52.9281	2112777	45.31	38	0.0398×	5.3316×	58	14.3854	N/A (female)	0.33	0.32	XX	Ry=0.00365 with 95% CI:0.0033-0.004 (ChrY:387/106702)
					210432	2	11748819	11051485	6254977	53.2392	4140085	35.24	38	0.0785×	10.1835×	58	33.8113	N/A (female)	0.34	0.31	XX	Ry=0.00365 with 95% CI:0.0034-0.0039 (ChrY:756/208959)
				2.45	204144	1	5724518	5201300	1983723	34.6531	1653240	28.88	39	0.0307×	3.9017×	57	16.6597	N/A (female)	0.323	0.3009	XX	Ry=0.0038 with 95% CI:0.0034-0.0042 (ChrY:316/83018)
				Above 2.45	204159	1	5958729	5575715	1389543	23.3195	1156898	19.4152	38	0.0203×	2.3687×	54	16.7426	N/A (female)	0.3468	0.3199	XX	Ry=0.0038 with 95% CI:0.0033-0.0043 (ChrY:221/58723)
				Standard	194622	1	7049430	6000388	1569566	22.2651	1323005	18.77	38	0.0254×	2.3698×	59	15.7089	N/A (female)	0.31	0.29	XX	Ry=0.0037 with 95% CI:0.0032-0.0042 (ChrY:245/66055)
					210433	2	15898447	13402712	3527404	22.1871	2264635	14.24	38	0.0438×	4.1398×	59	35.7988	N/A (female)	0.31	0.29	XX	Ry=0.00385 with 95% CI:0.0035-0.0042 (ChrY:438/113899)
				2.35_Merged	-	-	18644243	17086084	8622909	46.2497	6050554	32.4527	39	0.1141×	12.7465×	58	29.8316	N/A (female)	0.31	0.29	XX	Ry=0.00375 with 95% CI:0.0035-0.004 (ChrY:1131/302317)
				2.40_Merged	-	-	16411330	15451395	8722754	53.1508	6240761	38.0271	38	0.1182×	14.7481×	58	28.4542	N/A (female)	0.34	0.32	XX	Ry=0.0036 with 95% CI:0.0034-0.0038 (ChrY:1135/315115)
				Standard_Merged	-	-	22947877	19403100	5096970	22.2111	3584165	15.6187	38	0.0692×	6.3639×	59	29.6805	N/A (female)	0.31	0.29	XX	Ry=0.0038 with 95% CI:0.0035-0.0041 (ChrY:679/179834)
P9898	Castel Sozzio, Italy	Tomb 7 Ind. 1	Late Antiquity / Early Medieval	Below 2.15	194647	1	6057953	5131937	1734565	28.6329	1197393	19.77	39	0.0215×	2.3452×	55	30.9687	9.92 (5.77 - 14.07) - 2097	0.29	0.28	XY	Ry=0.08455 with 95% CI:0.0816-0.0875 (ChrY:2864/33880)
				2.2	194648	1	3643927	2980843	988120	27.1169	650327	17.85	38	0.0120×	1.0812×	57	34.1854	8.20 (2.14 - 14.25) - 1287	0.28	0.26	XY	Ry=0.08085 with 95% CI:0.0769-0.0848 (ChrY:1493/18461)
				2.25	194649	1	5769188	4664210	1630551	28.2631	1122873	19.46	39	0.0211×	1.5061×	58	31.1354	2.42 (-0.27 - 5.11) - 2072	0.27	0.25	XY	Ry=0.085 with 95% CI:0.0819-0.0881 (ChrY:2667/31379)
				2.3	194650	1	4944658	4451909	2179544	44.0788	1742779	35.25	39	0.0307×	2.2971×	54	20.0393	3.09 (1.09 - 5.09) - 2860	0.27	0.26	XY	Ry=0.08115 with 95% CI:0.0787-0.0836 (ChrY:3867/47669)
				2.35	194651	1	5982330	5478140	3059903	51.149	2545297	42.55	39	0.0480×	4.6757×	58	16.8177	2.96 (1.34 - 4.58) - 4613	0.29	0.26	XY	Ry=0.08625 with 95% CI:0.0842-0.0883 (ChrY:6084/70528)
					210434	2	15301641	13928304	7890819	51.5684	4953746	32.37	39	0.0941×	8.7838×	58	37.2214	1.46 (0.66 - 2.25) - 8960	0.29	0.26	XY	Ry=0.0874 with 95% CI:0.0859-0.0889 (ChrY:12031/137645)
				2.4	194652	1	9795377	9368750	5252572	53.623	4301752	43.92	40	0.0775×	9.5177×	55	18.102	2.48 (1.41 - 3.56) - 7386	0.32	0.3	XY	Ry=0.08465 with 95% CI:0.0831-0.0862 (ChrY:10047/118676)
					210435	2	24994951	23834799	13472803	53.9021	8124643	32.51	40	0.1475×	17.3223×	56	39.696	2.00 (1.34 - 2.65) - 13677	0.32	0.3	XY	Ry=0.08485 with 95% CI:0.0837-0.086 (ChrY:19090/224900)
				2.45	204151	1	7342295	6850489	3655089	49.7813	2955031	40.2467	38	0.0538×	7.0138×	56	19.153	2.95 (1.58 - 4.32) - 5323	0.3126	0.2964	XY	Ry=0.086 with 95% CI:0.0841-0.0879 (ChrY:7242/84214)
				Above 2.45	204143	1	4915130	4435627	1636624	33.2977	1352349	27.514	39	0.0237×	2.8569×	54	17.3696	3.83 (0.92 - 6.75) - 2320	0.3145	0.2947	XY	Ry=0.088 with 95% CI:0.0851-0.0909 (ChrY:3282/37293)
				Standard	194654	1	7293275	6844236	2614160	35.8434	2181189	29.91	41	0.0381×	3.6190×	54	16.5625	2.38 (0.88 - 3.88) - 3617	0.27	0.26	XY	Ry=0.08675 with 95% CI:0.0845-0.089 (ChrY:5216/60103)
					210436	2	21248214	19872834	7616575	35.8457	4819080	22.68	41	0.0847×	7.9628×	54	36.729	2.13 (1.20 - 3.07) - 8096	0.27	0.26	XY	Ry=0.08785 with 95% CI:0.0863-0.0894 (ChrY:11652/132614)
				2.35_Merged	-	-	21283971	19406444	10950722	51.4506	7420068	34.8622	39	0.1405×	12.6239×	58	32.2413	1.91 (1.23 - 2.59) - 13235	0.29	0.26	XY	Ry=0.0869 with 95% CI:0.0857-0.0881 (ChrY:17903/206075)
				2.40_Merged	-	-	34790328	33203549	18725375	53.8235	12312608	35.3909	40	0.2229×	24.2741×	56	34.2464	2.32 (1.78 - 2.85) - 20254	0.32	0.3	XY	Ry=0.0847 with 95% CI:0.0838-0.0856 (ChrY:28859/340687)
				Standard_Merged	-	-	28541489	26717070	10230735	35.8451	6989672	24.4895	41	0.1226×	11.0786×	54	31.6797	2.36 (1.59 - 3.12) - 11523	0.27	0.26	XY	Ry=0.08735 with 95% CI:0.0861-0.0886 (ChrY:16821/192518)
P9958	Castel Sozzio, Italy	Tomb 32	Late Antiquity / Early Medieval	Below 2.15	194623	1	6734908	5905663	2030726	30.1522	1683349	24.99	39	0.0322×	3.2216×	59	17.106	N/A (female)	0.31	0.28	XX	Ry=0.0042 with 95% CI:0.0038-0.0046 (ChrY:353/83968)
				2.2	194624	1	6819145	5587275	1268160	18.5971	534636	7.84	39	0.0093×	1.1033×	53	57.8416	N/A (female)	0.29	0.27	XX	Ry=0.00495 with 95% CI:0.0041-0.0058 (ChrY:130/26441)
				2.25	194625	1	6865117	5678012	917060	13.3583	388276	5.66	39	0.0068×	0.6352×	54	57.6608	N/A (female)	0.29	0.28	XX	Ry=0.00665 with 95% CI:0.0055-0.0078 (ChrY:128/19323)
				2.3	194626	1	7342559	6379996	2612013	35.5736	1637023	22.29	40	0.0308×	2.9860×	58	37.3271	N/A (female)	0.3	0.28	XX	Ry=0.00425 with 95% CI:0.0038-0.0047 (ChrY:344/81247)
				2.35	194627	1	6675307	5852272	4010411	60.0783	3119491	46.73	40	0.0656×	6.0792×	65	22.2152	N/A (female)	0.29	0.24	XX	Ry=0.00455 with 95% CI:0.0042-0.0049 (ChrY:707/154592)
					210437	2	18066170	15679369	10974363	60.7454	6026772	33.36	39	0.1267×	11.1033×	65	45.0832	N/A (female)	0.29	0.25	XX	Ry=0.0041 with 95% CI:0.0039-0.0043 (ChrY:1234/300157)
				2.4	194628	1	6347061	5830303	3740157	58.9274	3110199	49	39	0.0614×	6.1405×	61	16.8431	N/A (female)	0.31	0.28	XX	Ry=0.0042 with 95% CI:0.0039-0.0045 (ChrY:647/154324)
					210438	2	22905088	20949758	13618385	59.4557	8494331	37.08	39	0.1681×	15.6525×	61	37.626	N/A (female)	0.31	0.28	XX	Ry=0.0041 with 95% CI:0.0039-0.0043 (ChrY:1754/423420)
				2.45	204150	1	9078398	8374376	5021365	55.3111	4101450	45.1781	39	0.0809×	8.7637×	61	18.32	N/A (female)	0.3121	0.2756	XX	Ry=0.0044 with 95% CI:0.0041-0.0047 (ChrY:906/204553)
				Above 2.45	204160	1	6364293	5718628	1798080	28.2526	1502376	23.6063	39	0.0289×	2.5404×	59	16.4455	N/A (female)	0.3138	0.28	XX	Ry=0.00445 with 95% CI:0.004-0.0049 (ChrY:340/75977)
				Standard	194630	1	5220216	4027966	1148851	22.0077	948583	18.17	39	0.0206×	1.5731×	67	17.432	N/A (female)	0.28	0.24	XX	Ry=0.0046 with 95% CI:0.004-0.0052 (ChrY:216/47302)
					210439	2	12749110	9727221	2813820	22.0707	1738362	13.64	39	0.0379×	2.8605×	67	38.2206	N/A (female)	0.28	0.24	XX	Ry=0.0039 with 95% CI:0.0035-0.0043 (ChrY:338/87252)
				2.35_Merged	-	-	24741477	21531641	14984774	60.5654	8499922	34.3549	39	0.1774×	15.1916×	64	43.2763	N/A (female)	0.29	0.25	XX	Ry=0.0043 with 95% CI:0.0041-0.0045 (ChrY:1802/423153)
				2.40_Merged	-	-	29252149	26780061	17358542	59.3411	11509737	39.3466	39	0.2275×	20.3115×	61	33.6941	N/A (female)	0.31	0.28	XX	Ry=0.00415 with 95% CI:0.004-0.0043 (ChrY:2365/573261)
				Standard_Merged	-	-	17969326	13755187	3962671	22.0524	2684876	14.9414	39	0.0584×	4.3720×	67	32.2458	N/A (female)	0.28	0.24	XX	Ry=0.00415 with 95% CI:0.0038-0.0045 (ChrY:553/134491)
Negative Controls
SBa		-	-	-	204152	-	33109	24076	422	1.27458	328	0.99	42	Below 0.0001×	Below 0.0001×	78	22.2749	-	0	0	Inconclusive	Ry=0 with 95% CI:0.0-0.0, but consistent with XX (ChrY:0/13)
SBb	-	-	-	-	196783	-	1057512	925961	21004	1.98617	9405	0.89	46	0.0002×	0.0250×	81	55.2228	-	0.02	0.02	Consistent with XX but not XY	Ry=0.02675 with 95% CI:0.0104-0.0431 (ChrY:10/374)
SBb_PMD											302	0.03	43	Below 0.0001×	Below 0.0001×	65	98.5622		0.7	0.55	Consistent with XX	Ry=0 with 95% CI:0.0-0.0, but consistent with XX (ChrY:0/16)
SBc	-	-	-	-	196786	-	1259912	1133708	41916	3.3269	12945	1.03	42	0.0003×	0.0489×	70	69.1168	-	0	0	Consistent with XX but not XY	Ry=0.02125 with 95% CI:0.0088-0.0337 (ChrY:11/517)
SBd	-	-	-	-	196789	-	1321111	1167197	39359	2.97923	12268	0.93	42	0.0003×	0.0421×	69	68.8305	-	0	0	Not Assigned	Ry=0.0387 with 95% CI:0.0216-0.0558 (ChrY:19/491)
EBa	-	-	-	-	204139	-	807208	544027	12586	1.5592	7940	0.98	42	0.0002×	0.0206×	76	36.914	-	0	0	Consistent with XX but not XY	Ry=0.0156 with 95% CI:0.002-0.0292 (ChrY:5/320)
EBb	-	-	-	-	196784	-	923179	709069	37302	4.0406	6486	0.7	45	0.0002×	0.0048×	79	82.6122	-	0	0	Not Assigned	Ry=0.04545 with 95% CI:0.0164-0.0745 (ChrY:9/198)
EBc	-	-	-	-	196787	-	1091087	937595	19741	1.8093	4583	0.42	43	0.0001×	0.0106×	68	76.7844	-	0	0	Consistent with XY but not XX	Ry=0.0699 with 95% CI:0.0333-0.1065 (ChrY:13/186)
EBd	-	-	-	-	196790	-	1023537	925878	11159	1.09024	7078	0.69	42	0.0002×	0.0030×	67	36.5714	-	0	0	Consistent with XY but not XX	Ry=0.0652 with 95% CI:0.0333-0.0971 (ChrY:15/230)
LBa	-	-	-	-	196788	-	1199514	1071653	10374	0.86485	3687	0.31	42	0.0001×	0.0089×	66	64.4592	-	0	0	Consistent with XX but not XY	Ry=0.02225 with 95% CI:-0.0026-0.0471 (ChrY:3/135)
LBb	-	-	-	-	196791	-	1021388	874561	24400	2.38891	4377	0.43	42	0.0001×	0.0036×	65	82.0615	-	0	0	Consistent with XX but not XY	Ry=0.02825 with 95% CI:0.0038-0.0527 (ChrY:5/177)
LBc	-	-	-	-	196782	-	830518	664714	8170	0.983723	1406	0.17	42	Below 0.0001×	Below 0.0001×	45	82.7907	-	0	0	Inconclusive	Ry=0 with 95% CI:0.0-0.0, but consistent with XX (ChrY:0/43)
LBd	-	-	-	-	196785	-	547202	481046	7327	1.33899	1906	0.35	40	Below 0.0001×	Below 0.0001×	69	73.9866	-	0	0	Not Assigned	Ry=0.0435 with 95% CI:-0.0046-0.0916 (ChrY:3/69)
LBe	-	-	-	-	204155	-	119685	95332	110	0.0919079	26	0.02	48	Below 0.0001×	Below 0.0001×	43	76.3636	-	0	0	Inconclusive	Ry=0 with 95% CI:0.0-0.0, but consistent with XX (ChrY:0/1)
Notes:
SB - Negative controls produced during SPT separations
EB - Negative controls produced during DNA extractions
LB - Negative controls produced during library production
All controls went through all downstream analysis treated as a normal sample

## Sheet: SuppTableS2
Supplementary Table S2: Summary results for sequencing data and authenticity metrics after randomly subsampling the total reads of the best 2 SPT intervals and the Standard extraction (as identified in Supplementary Table S1). Best SPT interval (by unique endogenous DNA percentage) shown as bold.
Sample ID	Site	Archaeological ID	Archaeological Period		Total reads Subsampled	Trimmed reads	Aligned Reads	%Endogenous (before duplicate removal)	Endogenous fold change over Standard extraction	Unique reads	%Endogenous unique (duplicates removed)	Endogenous unique fold change over Standard extraction	Average length	Normalized duplication rate	Expected distinct reads out of 100 Million (preseq lc_extrap)	Expected distinct reads out of 500 Million (preseq lc_extrap)	%GC (unique reads)	Genomic coverage	MT coverage	Deamination Frequency 5'	Deamination Frequency 3'
						-O 1, -m 18	-l 1000, -q 30, -F 4	(Aligned reads / Total reads) × 100			(Unique reads / Total reads) × 100			[(Aligned reads - Unique reads) / Aligned reads] × 100
1970	Praha 5 - Jinonice, Czech Republic	Jinonice gr. 18, P7A-16113	Iron Age	2.35_Merged	12999653	11715820	2800609	21.5437	3.26812	2134545	16.42	2.75842	49	23.7828	8.87895e+06	9681215	38	0.0343×	2.9900×	0.42	0.39
				2.40_Merged	12999653	12008541	3744183	28.8022	4.36921	2698317	20.7568	3.48696	51	27.9331	9.51117e+06	1.03671e+07	37	0.0445×	4.6910×	0.44	0.41
				Standard_Merged	12999653	9310021	856948	6.59208	-	773830	5.9527	-	52	9.6993	9.44769e+06	1.05305e+07	38	0.0131×	1.3869×	0.4	0.38
2338	Praha 5 - Malà Ohrada, Czech Republic	Malá Ohrada gr. 25, P7A-38770	Early Bronze Age	2.35_Merged	23111619	21061128	12296190	53.2035	8.5288	6595200	28.5363	5.27923	51	46.3639	1.27088e+07	1.43017e+07	37	0.1094×	7.3870×	0.36	0.34
				2.40_Merged	23111619	20551602	10893607	47.1348	7.55595	5715094	24.7282	4.57474	50	47.5372	1.06834e+07	11671976	37	0.0928×	6.8380×	0.36	0.35
				Standard_Merged	23111619	16355031	1441726	6.2381	-	1249273	5.40539	-	53	13.3488	1.05461e+07	1.16845e+07	37	0.0217×	1.5286×	0.35	0.33
2909	Praha 5 - Jinonice , Czech Republic	Jinonice gr. 27, P7A-16119	Iron Age	2.35_Merged	19600770	16921080	8348214	42.5913	4.19929	4836172	24.6734	3.43786	51	42.0694	1.065e+07	11766098	37	0.0797×	4.9095×	0.41	0.4
				2.45_Merged	19600770	17318610	5357585	27.3335	2.69495	3912141	19.9591	2.781	44	26.9794	1.43343e+07	1.67541e+07	37	0.0568×	4.5476×	0.35	0.35
				Standard_Merged	19600770	15139307	1988006	10.1425	-	1406741	7.17697	-	50	29.2386	5.39307e+06	5.69867e+06	37	0.0228×	1.6388×	0.37	0.37
2910	Praha 5 - Jinonice , Czech Republic	Jinonice gr. 35, P7A-16122	Iron Age	2.35_Merged	19067198	15998271	6936091	36.3771	5.79654	4493577	23.5671	4.9235	53	35.2146	1.20864e+07	1.36367e+07	40	0.0775×	6.9013×	0.31	0.29
				2.40_Merged	19067198	16655777	7308436	38.3299	6.10771	4596608	24.1074	5.03639	52	37.1054	11808904	1.32787e+07	39	0.0783×	7.5018×	0.32	0.3
				Standard_Merged	19067198	13621850	1196591	6.27565	-	912679	4.78664	-	56	23.7267	4.58668e+06	4.82683e+06	40	0.0167×	1.4963×	0.29	0.27
P9883	Castel Sozzio, Italy	Tomb 15, Cranio V	Late Antiquity / Early Medieval	2.35_Merged	22156919	20213345	11775227	53.1447	2.89483	7967870	35.9611	2.46849	59	32.3336	2.14255e+07	2.68926e+07	39	0.1525×	11.1865×	0.32	0.3
				2.40_Merged	22156919	20330066	11134526	50.253	2.73732	7787062	35.1451	2.41247	59	30.0638	2.30211e+07	3.00083e+07	39	0.1489×	13.3948×	0.35	0.33
				Standard_Merged	22156919	16861883	4067679	18.3585	-	3227834	14.5681	-	61	20.6468	16086410	1.89661e+07	38	0.0637×	4.1120×	0.31	0.28
P9884	Castel Sozzio, Italy	Tomb 27	Late Antiquity / Early Medieval	2.40_Merged	23510075	21632313	9129113	38.8306	1.55318	6315590	26.8633	1.51608	57	30.8192	18611382	2.26046e+07	38	0.1183×	13.7284×	0.31	0.28
				2.45_Merged	23510075	20835393	10307887	43.8446	1.75373	7421632	31.5679	1.78159	63	28.0005	2.31343e+07	2.98803e+07	39	0.1526×	26.8616×	0.31	0.26
				Standard_Merged	23510075	19274178	5877681	25.0007	-	4165741	17.719	-	63	29.1261	1.43557e+07	1.67606e+07	38	0.0860×	14.3679×	0.31	0.27
P9892	Castel Sozzio, Italy	Tomb 19A	Late Antiquity / Early Medieval	2.35_Merged	22275304	20765084	11688224	52.4717	2.03766	7982755	35.8368	1.94504	51	31.7026	2.19616e+07	2.78997e+07	38	0.1321×	7.9684×	0.3	0.29
				2.40_Merged	22275304	21035086	12268148	55.0751	2.13876	8755113	39.3041	2.13323	51	28.6354	2.543e+07	3.35304e+07	38	0.1452×	8.5831×	0.31	0.3
				Standard_Merged	22275304	18124099	5736113	25.751	-	4104156	18.4247	-	51	28.4506	1.43637e+07	1.67027e+07	37	0.0681×	3.4892×	0.29	0.28
P9895	Castel Sozzio, Italy	Tomb 16	Late Antiquity / Early Medieval	2.35_Merged	16411330	15039456	7590519	46.2517	2.08234	5512564	33.59	1.97617	58	27.3757	1.98009e+07	2.53676e+07	39	0.1041×	11.7857×	0.31	0.29
				2.40_Merged	16411330	15451395	8722760	53.1508	2.39295	6240766	38.0272	2.23721	58	28.4542	2.12028e+07	27373470	38	0.1182×	14.7481×	0.34	0.32
				Standard_Merged	16411330	13876681	3645186	22.2114	-	2789526	16.9976	-	59	23.4737	1.23119e+07	1.39847e+07	38	0.0540×	4.9499×	0.31	0.29
P9898	Castel Sozzio, Italy	Tomb 7 Ind. 1	Late Antiquity / Early Medieval	2.35_Merged	21283971	19406444	10950739	51.4506	1.43548	7420082	34.8623	1.31322	58	32.2413	2.05034e+07	2.55193e+07	39	0.1405×	12.6239×	0.29	0.26
				2.40_Merged	21283971	20313556	11456650	53.8276	1.5018	8645827	40.6213	1.53015	56	24.5344	2.82023e+07	3.83845e+07	40	0.1570×	18.3048×	0.32	0.3
				Standard_Merged	21283971	19923009	7628626	35.8421	-	5650313	26.5473	-	54	25.9328	1.97919e+07	2.44324e+07	41	0.0993×	9.2208×	0.27	0.26
P9958	Castel Sozzio, Italy	Tomb 32	Late Antiquity / Early Medieval	2.35_Merged	17969326	15638056	10882898	60.5638	2.74635	6975521	38.819	2.59808	65	35.9038	1.70643e+07	2.00448e+07	39	0.1465×	12.7877×	0.29	0.25
				2.40_Merged	17969326	16451974	10662781	59.3388	2.69081	8088205	45.0112	3.01251	61	24.1454	2.71522e+07	3.63302e+07	39	0.1607×	14.9534×	0.31	0.28
				Standard_Merged	17969326	13755187	3962671	22.0524	-	2684876	14.9414	-	67	32.2458	8940220	9823074	39	0.0584×	4.3720×	0.28	0.24

## Sheet: SuppTableS3
Supplementary Table S3: Results for best SPT interval versus Standard extraction, per sample. Bold denotes statistically significant metric differences, based on a P-value threshold of 0.05 using paired Wilcoxon tests. "Best SPT Interval" identified based on best % Endogenous Unique subsampled results from Supplementary Table S2.
		Percentage Endogenous (before duplicate removal)			Percentage Endogenous Unique <2.40 Interval			Genomic Coverage			Mitochondrial Coverage			Expected distinct reads out of 100 Million (preseq lc_extrap)			Expected distinct reads out of 500 Million (preseq lc_extrap)			Normalized Duplication Rates			Average Read Length			5' Terminal Deamination			3' Terminal Deamination			Contamination with hapConX > 0.02× (2000 SNPs)
		From Supplementary Table S2			From Supplementary Table S4			From Supplementary Table S2			From Supplementary Table S2			From Supplementary Table S2			From Supplementary Table S2			From Supplementary Table S2			From Supplementary Table S2			From Supplementary Table S2			From Supplementary Table S2			From Supplementary Table S1
Archaeological ID	Sample ID (best SPT interval)	Best SPT Interval	Standard	Fold Change	Single <2.40 Interval	Standard	Fold Change	Best SPT Interval	Standard	Fold Change	Best SPT Interval	Standard	Fold Change	Best SPT Interval	Standard	Fold Change	Best SPT Interval	Standard	Fold Change	Best SPT Interval	Standard	Fold Change	Best SPT Interval	Standard	Fold Change	Best SPT Interval	Standard	Fold Change	Best SPT Interval	Standard	Fold Change	Best SPT Interval	Standard	Fold Change
Praha 5 - Jinonice gr. 18, P7A-16113	1970 (2.40)	28.8022	6.59208	4.36921	NA	NA	NA	0.0445	0.0131	3.39695	4.691	1.3869	3.38236	9.51117e+06	9.44769e+06	1.00672	1.03671e+07	1.05305e+07	0.984485	27.9331	9.6993	2.87991	51	52	0.980769	0.44	0.4	1.1	0.41	0.38	1.07895	2.8087	4.7901	0.586355
Praha 5 - Malá Ohrada gr. 25, P7A-38770	2338 (2.35)	53.2035	6.2381	8.5288	25.75	5.93	4.34233	0.1094	0.0217	5.04147	7.387	1.5286	4.83253	1.27088e+07	1.05461e+07	1.20508	1.43017e+07	1.16845e+07	1.22399	46.3639	13.3488	3.47326	51	53	0.962264	0.36	0.35	1.02857	0.34	0.33	1.0303	2.8172	2.1064	1.33745
Praha 5 - Jinonice gr. 27, P7A-16119	2909 (2.35)	42.5913	10.1425	4.19929	NA	NA	NA	0.0797	0.0228	3.49561	4.9095	1.6388	2.99579	1.065e+07	5.39307e+06	1.97476	11766098	5.69867e+06	2.06471	42.0694	29.2386	1.43883	51	50	1.02	0.41	0.37	1.10811	0.4	0.37	1.08108	2.7948	2.686	1.04051
Praha 5 - Jinonice gr. 35, P7A-16122	2910 (2.40)	38.3299	6.27565	6.10771	27.28	5.96	4.57718	0.0783	0.0167	4.68862	7.5018	1.4963	5.01357	11808904	4.58668e+06	2.57461	1.32787e+07	4.82683e+06	2.75102	37.1054	23.7267	1.56387	52	56	0.928571	0.32	0.29	1.10345	0.3	0.27	1.11111	1.7167	1.9991	0.858736
Castel Sozzio - Tomb 15, Cranio V	P9883 (2.35)	53.1447	18.3585	2.89483	34.95	16.93	2.06438	0.1525	0.0637	2.39403	11.1865	4.112	2.72045	2.14255e+07	16086410	1.3319	2.68926e+07	1.89661e+07	1.41793	32.3336	20.6468	1.56604	59	61	0.967213	0.32	0.31	1.03226	0.3	0.28	1.07143	2.7567	1.2983	2.12332
Castel Sozzio - Tomb 27	P9884 (2.45)	43.8446	25.0007	1.75373	31.68	22.88	1.38462	0.1526	0.086	1.77442	26.8616	14.3679	1.86956	2.31343e+07	1.43557e+07	1.61151	2.98803e+07	1.67606e+07	1.78277	28.0005	29.1261	0.961352	63	63	1	0.31	0.31	1	0.26	0.27	0.962963	4.0871	2.5085	1.6293
Castel Sozzio - Tomb 19A	P9892 (2.40)	55.0751	25.751	2.13876	NA	NA	NA	0.1452	0.0681	2.13216	8.5831	3.4892	2.4599	2.543e+07	1.43637e+07	1.77043	3.35304e+07	1.67027e+07	2.00749	28.6354	28.4506	1.0065	51	51	1	0.31	0.29	1.06897	0.3	0.28	1.07143	2.7548	2.6175	1.05245
Castel Sozzio - Tomb 16	P9895 (2.40)	53.1508	22.2114	2.39295	36.53	19.9	1.83568	0.1182	0.054	2.18889	14.7481	4.9499	2.97947	2.12028e+07	1.23119e+07	1.72214	27373470	1.39847e+07	1.95739	28.4542	23.4737	1.21217	58	59	0.983051	0.34	0.31	1.09677	0.32	0.29	1.10345	NA	NA	NA
Castel Sozzio - Tomb 7 Ind. 1	P9898 (2.40)	53.8276	35.8421	1.5018	41.57	33.39	1.24498	0.157	0.0993	1.58107	18.3048	9.2208	1.98516	2.82023e+07	1.97919e+07	1.42494	3.83845e+07	2.44324e+07	1.57105	24.5344	25.9328	0.946078	56	54	1.03704	0.32	0.27	1.18519	0.3	0.26	1.15385	2.3167	2.355	0.983737
Castel Sozzio - Tomb 32	P9958 (2.40)	59.3388	22.0524	2.69081	47.61	18.54	2.56796	0.1607	0.0584	2.75171	12.7877	4.372	2.92491	2.71522e+07	8940220	3.03708	3.63302e+07	9823074	3.69846	24.1454	32.2458	0.748793	61	67	0.910448	0.31	0.28	1.10714	0.28	0.24	1.16667	NA	NA	NA
	Wilcoxon P-value	0.001953			0.01563			0.001953			0.001953			0.001953			0.003906			0.08398			0.1641			0.003906			0.005859			0.5469
	Combined all sample average	48.1308	17.8464	3.65779	35.0529	17.6471	2.57388	0.11981	0.05038	2.94449	11.6961	4.65624	3.11637	1.91226e+07	1.15823e+07	1.76592	2.42105e+07	1.3341e+07	1.94593	31.9575	23.5889	1.57968	55.3	56.6	0.978935	0.344	0.318	1.08305	0.321	0.297	1.08312	2.75659	2.54511	1.20148

## Sheet: SuppTableS4
Supplementary Table 4: Summary results of subsampled sequencing data and metrics for the 2.40gr/cm3 single separation compared to the Standard extraction.
Archaeological ID	Sample ID	Initial powder amount (mg)	Interval	Total reads Subsampled	Trimmed reads	Aligned Reads	%Endogenous (before duplicate removal)	Unique reads	%Endogenous unique (duplicates removed)	Endogenous Unique Fold Change over Standard extraction	Average length	Duplication rate	%GC	Genomic coverage	MT coverage	Contamination via hapConX (95% CI) - Number of used SNPs	Deamination Frequency 5'	Deamination Frequency 3'	Molecular Sex Assignment via ry_compute from Skoglund et al. (2013)	Ry_compute output from Skoglund et al. (2013)
					-O 1, -m 18	-l 1000, -q 30, -F 4	(Aligned reads / Total reads) × 100		(Unique reads / Total reads) × 100			[(Aligned reads - Unique reads) / Aligned reads] × 100				(95% CI) - Number of used SNPs				(number of ChrY reads / total ChrX+ChrY reads)
Praha 5 - Malá Ohrada gr. 25, P7A-38770	2338	89	Below 2.40	7792978	6663588	2455232	31.51	2007010	25.75	4.34233	48	0.182558	38	0.0311×	2.6798×	2.39 (0.56 - 4.22) - 3056	0.33	0.33	XY	Ry=0.082 with 95% CI:0.0804-0.085 (ChrY:4597/55563)
		50	Standard	7792978	5517867	486354	6.24	461801	5.93	-	53	0.0504838	37	0.0080×	0.6193×	2.44 (-2.59 - 7.47) - 799	0.35	0.33	XY	Ry=0.08185 with 95% CI:0.0772-0.0865 (ChrY:1076/13146)
Praha 5 - Jinonice gr. 35, P7A-16122	2910	55	Below 2.40	3230561	2693506	1046157	32.38	881322	27.28	4.57718	50	0.157562	39	0.0143×	1.6391×	3.11 (-0.55 - 6.76) - 1432	0.29	0.28	XY	Ry=0.0854 with 95% CI:0.0819-0.0889 (ChrY:2086/24418)
		50	Standard	3230561	2308307	202980	6.28	192483	5.96	-	57	0.0517145	40	0.0036×	0.2832×	0.00 (-19.21 - 19.21) - 357	0.29	0.27	XY	Ry=0.08915 with 95% CI:0.0815-0.0968 (ChrY:476/5339)
Castel Sozzio - Tomb 15, Cranio V	P9883	119	Below 2.40	6739222	6165219	2857465	42.4	2355273	34.95	2.06438	56	0.175747	39	0.0428×	4.0990×	2.22 (0.54 - 3.90) - 4269	0.31	0.29	XY	Ry=0.0872 with 95% CI:0.085-0.0894 (ChrY:5682/65154)
		50	Standard	6739222	5128929	1236607	18.35	1141272	16.93	-	61	0.077094	38	0.0226×	1.3963×	0.00 (-1.21 - 1.21) - 2265	0.31	0.28	XY	Ry=0.0827 with 95% CI:0.0797-0.0857 (ChrY:2656/32106)
Castel Sozzio - Tomb 27	P9884	124	Below 2.40	5042893	4511906	1911470	37.9	1597431	31.68	1.38462	60	0.164292	38	0.0314×	4.8455×	4.30 (1.62 - 6.97) - 3014	0.3	0.26	XY	Ry=0.08925 with 95% CI:0.0866-0.0919 (ChrY:4053/45401)
		50	Standard	5042893	4133774	1260399	24.99	1153873	22.88	-	64	0.0845177	38	0.0241×	4.2661×	0.37 (-1.80 - 2.53) - 2345	0.31	0.26	XY	Ry=0.0896 with 95% CI:0.0865-0.0927 (ChrY:2923/32631)
Castel Sozzio - Tomb 16	P9895	115	Below 2.40	5988669	5473258	2623842	43.81	2187616	36.53	1.83568	59	0.166255	39	0.0423×	5.6880×	N/A (female)	0.32	0.29	XX	Ry=0.0039 with 95% CI:0.0035-0.0043 (ChrY:429/109440)
		50	Standard	5988669	5062350	1329533	22.2	1191717	19.9	-	60	0.103657	38	0.0232×	2.2048×	N/A (female)	0.31	0.29	XX	Ry=0.0037 with 95% CI:0.0032-0.0042 (ChrY:223/59903)
Castel Sozzio - Tomb 7 Ind. 1	P9898	115	Below 2.40	4290698	3932602	2149515	50.1	1783834	41.57	1.24498	58	0.170123	39	0.0339×	4.2889×	1.83 (0.24 - 3.41) - 3277	0.29	0.27	XY	Ry=0.0862 with 95% CI:0.0837-0.0887 (ChrY:4229/49065)
		50	Standard	4290698	4016201	1537438	35.83	1432812	33.39	-	54	0.0680522	41	0.0253×	2.5135×	0.57 (-0.86 - 2.01) - 2448	0.27	0.26	XY	Ry=0.0878 with 95% CI:0.085-0.0906 (ChrY:3463/39447)
Castel Sozzio - Tomb 32	P9958	92	Below 2.40	6898019	6198075	4113129	59.63	3284434	47.61	2.56796	64	0.201476	39	0.0688×	7.6638×	N/A (female)	0.3	0.26	XX	Ry=0.0045 with 95% CI:0.0042-0.0048 (ChrY:741/164836)
		50	Standard	6898019	5278804	1521044	22.05	1279046	18.54	-	67	0.1591	39	0.0280×	2.1514×	N/A (female)	0.28	0.24	XX	Ry=0.0041 with 95% CI:0.0036-0.0046 (ChrY:262/63967)

## Sheet: SuppTableS5
Supplementary Table 5: Predicted library complexity for the 2 best SPT intervals and each sample's Standard extraction, using preseq's lc_extrap function.
	Praha 5 - Jinonice gr. 18, P7A-16113									Praha 5 - Malá Ohrada gr. 25, P7A-38770									Praha 5 - Jinonice gr. 27, P7A-16119									Praha 5 - Jinonice gr. 35, P7A-16122									Castel Sozzio - Tomb 15, Cranio V									Castel Sozzio - Tomb 27
	1970_2.35			1970_2.40			1970_Standard			2338_2.35			2338_2.40			2338_Standard			2909_2.35			2909_2.45			2909_Standard			2910_2.35			2910_2.40			2910_Standard			P9883_2.35			P9883_2.40			P9883_Standard			P9884_2.40			P9884_2.45
Total Reads	Expected Distinct	Lower 0.95CI	Upper 0.95CI	Expected Distinct	Lower 0.95CI	Upper 0.95CI	Expected Distinct	Lower 0.95CI	Upper 0.95CI	Expected Distinct	Lower 0.95CI	Upper 0.95CI	Expected Distinct	Lower 0.95CI	Upper 0.95CI	Expected Distinct	Lower 0.95CI	Upper 0.95CI	Expected Distinct	Lower 0.95CI	Upper 0.95CI	Expected Distinct	Lower 0.95CI	Upper 0.95CI	Expected Distinct	Lower 0.95CI	Upper 0.95CI	Expected Distinct	Lower 0.95CI	Upper 0.95CI	Expected Distinct	Lower 0.95CI	Upper 0.95CI	Expected Distinct	Lower 0.95CI	Upper 0.95CI	Expected Distinct	Lower 0.95CI	Upper 0.95CI	Expected Distinct	Lower 0.95CI	Upper 0.95CI	Expected Distinct	Lower 0.95CI	Upper 0.95CI	Expected Distinct	Lower 0.95CI	Upper 0.95CI	Expected Distinct
1000000	898374	898143	898601	903212	902994	903390	888606	887902	889280	933076	932998	933156	922884	922807	922970	901882	901578	902242	918325	918214	918422	933060	932941	933170	823883	823546	824197	925278	925187	925373	922688	922554	922792	792480	791972	792893	958283	958200	958374	959908	959844	959981	936123	935961	936256	951028	950968	951095	961448
2000000	1.6331e+06	1.63243e+06	1.63381e+06	1651085	1.6505e+06	1.65164e+06	1.60613e+06	1.60382e+06	1.6083e+06	1749886	1.74967e+06	1.75011e+06	1.71399e+06	1.71373e+06	1.71421e+06	1.65172e+06	1.65085e+06	1652958	1.69912e+06	1.69881e+06	1.69941e+06	1.75124e+06	1750896	1.75159e+06	1.41222e+06	1.41129e+06	1.41313e+06	1723421	1.72313e+06	1.7237e+06	1714906	1.7146e+06	1715227	1.32595e+06	1.32451e+06	1.32737e+06	1.84168e+06	1.84144e+06	1.8419e+06	1.84768e+06	1.84751e+06	1.84789e+06	1.76481e+06	1.76435e+06	1.7653e+06	1.81475e+06	1.81454e+06	1.81495e+06	1.85289e+06
3000000	2.24711e+06	2.24599e+06	2.24839e+06	2.28391e+06	2282918	2.28494e+06	2.2039e+06	2.19871e+06	2.20854e+06	2.47142e+06	2471063	2.47182e+06	2399723	2.39927e+06	2.40013e+06	2.29254e+06	2.29032e+06	2294791	2.372e+06	2.37149e+06	2.37252e+06	2476790	2.47615e+06	2.47744e+06	1.86156e+06	1.8599e+06	1.86306e+06	2.42039e+06	2.41986e+06	2.42088e+06	2404294	2.4038e+06	2404800	1.71915e+06	1.71669e+06	1.72297e+06	2660081	2.65964e+06	2.66043e+06	2672793	2.67248e+06	2.67317e+06	2.50825e+06	2.50741e+06	2.50919e+06	2.60424e+06	2.60383e+06	2.60464e+06	2.68299e+06
4000000	2.7692e+06	2767563	2.77114e+06	2.82801e+06	2.82653e+06	2.82964e+06	2.71334e+06	2.70382e+06	2.7226e+06	3113740	3.1132e+06	3.11432e+06	2999795	2.99915e+06	3.00042e+06	2.85e+06	2.84483e+06	2853976	2958460	2.95775e+06	2.9592e+06	3126224	3.12524e+06	3.12723e+06	2.21974e+06	2.21658e+06	2.22221e+06	3.03527e+06	3.03451e+06	3.03597e+06	3010818	3.0101e+06	3.01151e+06	2025254	2.01792e+06	2.03324e+06	3421321	3420615	3421799	3.44278e+06	3.4423e+06	3.44334e+06	3.1819e+06	3180634	3.18339e+06	3329845	3329182	3.33047e+06	3458772
5000000	3.21952e+06	3.21713e+06	3.22208e+06	3.30185e+06	3.29974e+06	3.30434e+06	3.15409e+06	3.13849e+06	3.1714e+06	3.68944e+06	3.68871e+06	3.69019e+06	3.52925e+06	3.52844e+06	3.53007e+06	3.34132e+06	3331698	3.34854e+06	3474567	3.47364e+06	3.47546e+06	3.71215e+06	3.71092e+06	3.71353e+06	2.51379e+06	2.5073e+06	2.51938e+06	3.58254e+06	3.58156e+06	3.5835e+06	3549386	3.54846e+06	3.55037e+06	2.2727e+06	2.25715e+06	2.28603e+06	4131858	4.13092e+06	4.13249e+06	4163855	4.16319e+06	4.16463e+06	3.79714e+06	3.79539e+06	3.79926e+06	3999914	3998967	4000782	4186164
6000000	3.61271e+06	3.60915e+06	3.61636e+06	3.71893e+06	3.71617e+06	3.72226e+06	3542791	3.5183e+06	3.56869e+06	4208551	4.20769e+06	4.20945e+06	3.99983e+06	3.9989e+06	4000842	3.77941e+06	3.76199e+06	3791812	3.93255e+06	3.93144e+06	3.93365e+06	4244397	4.24299e+06	4.24617e+06	2.76059e+06	2.74834e+06	2.76962e+06	4.0733e+06	4.07208e+06	4.07459e+06	4031536	4.03031e+06	4.03282e+06	2.47745e+06	2.44949e+06	2.49778e+06	4797197	4.79604e+06	4797994	4.84122e+06	4.84035e+06	4842267	4.36278e+06	4.36036e+06	4.36545e+06	4621317	4620069	4.62244e+06	4870163
7000000	3.95932e+06	3.9542e+06	3.96466e+06	4.08913e+06	4.08555e+06	4.09312e+06	3.88865e+06	3853429	3.9266e+06	4679209	4.67818e+06	4.68024e+06	4420824	4419798	4.42199e+06	4.17373e+06	4143740	4.19245e+06	4341952	4.34071e+06	4.3433e+06	4.73082e+06	4.72911e+06	4.73294e+06	2971354	2.95341e+06	2.98711e+06	4.51642e+06	4.51492e+06	4.518e+06	4466186	4464630	4467783	2.65032e+06	2.60741e+06	2678672	5.42204e+06	5.42062e+06	5.42298e+06	5.47936e+06	5.47835e+06	5.48067e+06	4.88539e+06	4.88226e+06	4.88871e+06	5.19977e+06	5.1982e+06	5.20116e+06	5.51506e+06
8000000	4.26752e+06	4.26028e+06	4.27555e+06	4.42071e+06	4.41597e+06	4425621	4.19844e+06	4.15154e+06	4.25284e+06	5107956	5.10678e+06	5.10913e+06	4799644	4.79855e+06	4.80093e+06	4.52995e+06	4.48577e+06	4.55589e+06	4710305	4.70887e+06	4.71183e+06	5177731	5.17559e+06	5.18014e+06	3.15398e+06	3.12731e+06	3.18071e+06	4.91891e+06	4.91717e+06	4.92073e+06	4.86042e+06	4.85852e+06	4.86233e+06	2.79899e+06	2.74023e+06	2.83578e+06	6.01032e+06	6.00867e+06	6.01143e+06	6082110	6.08091e+06	6.08367e+06	5.37067e+06	5.36649e+06	5.37482e+06	5.74009e+06	5.7381e+06	5.74177e+06	6124568
9000000	4.54319e+06	4.53404e+06	4.55524e+06	4.71959e+06	4.71299e+06	4.72638e+06	4.47851e+06	4.41732e+06	4.5513e+06	5500285	5.49892e+06	5.50151e+06	5.1423e+06	5.14111e+06	5.1437e+06	4.85396e+06	4794017	4.88629e+06	5.04367e+06	5.04198e+06	5045300	5.59018e+06	5.58778e+06	5.59309e+06	3.31321e+06	3.27764e+06	3350864	5.28631e+06	5284392	5.28845e+06	5.21992e+06	5.21769e+06	5.22222e+06	2.92863e+06	2.85443e+06	2.97547e+06	6565513	6.56368e+06	6.56678e+06	6652734	6.65131e+06	6.65452e+06	5.82289e+06	5.81744e+06	5.82782e+06	6246304	6.2439e+06	6.24838e+06	6.70186e+06
10000000	4.79176e+06	4779835	4.80926e+06	4.99048e+06	4.98143e+06	4.99992e+06	4.7333e+06	4.65544e+06	4.8258e+06	5860747	5.85922e+06	5.86204e+06	5453735	5.45246e+06	5.45527e+06	5.15034e+06	5.07354e+06	5.18972e+06	5.34694e+06	5.345e+06	5.34871e+06	5.97245e+06	5969626	5.97598e+06	3.45363e+06	3.41013e+06	3.50176e+06	5.62333e+06	5.62106e+06	5.62566e+06	5.54935e+06	5.54675e+06	5.55203e+06	3.04231e+06	2.95391e+06	3.09998e+06	7.09057e+06	7.08864e+06	7.09206e+06	7194146	7.19243e+06	7.19615e+06	6245614	6.2386e+06	6.2512e+06	6.72188e+06	6.71905e+06	6.72439e+06	7249783
11000000	5.01701e+06	5000034	5041194	5.23743e+06	5.22597e+06	5.25243e+06	4.96461e+06	4.87052e+06	5.08185e+06	6193114	6.19146e+06	6.19447e+06	5.73803e+06	5.73662e+06	5.73967e+06	5.42336e+06	5.32828e+06	5.46913e+06	5.62407e+06	5.62179e+06	5.62608e+06	6.32805e+06	6324674	6.33217e+06	3578430	3.52672e+06	3.6309e+06	5.93367e+06	5.93102e+06	5.93624e+06	5852486	5.84959e+06	5.8556e+06	3.14344e+06	3.04145e+06	3.21131e+06	7588226	7.58618e+06	7.58994e+06	7708840	7706776	7.7111e+06	6.64165e+06	6.63311e+06	6.64907e+06	7.16984e+06	7166577	7.17269e+06	7.77079e+06
12000000	5.22343e+06	5.19804e+06	5.25168e+06	5.46376e+06	5.44935e+06	5.48896e+06	5.17674e+06	5.06599e+06	5.32188e+06	6.5007e+06	6.49885e+06	6.50222e+06	5.99856e+06	5.99696e+06	6.00043e+06	5.67403e+06	5.56152e+06	5.72745e+06	5.87841e+06	5.87578e+06	5.88071e+06	6.66033e+06	6.65608e+06	6.66483e+06	3.69041e+06	3.6301e+06	3.74987e+06	6.22055e+06	6.21746e+06	6.22379e+06	6132419	6.12941e+06	6.13608e+06	3233807	3.1191e+06	3.3114e+06	8.06076e+06	8.05861e+06	8.06269e+06	8.19903e+06	8.19666e+06	8201541	7.0138e+06	7.00206e+06	7023139	7.59272e+06	7.58908e+06	7.59592e+06	8.267e+06
13000000	5.41218e+06	5.37901e+06	5.44361e+06	5.67135e+06	5.65393e+06	5.70994e+06	5.37448e+06	5.24444e+06	5.5504e+06	6.78621e+06	6.78415e+06	6.78792e+06	6.23817e+06	6236325	6.24027e+06	5.90587e+06	5.77593e+06	5.96716e+06	6.11275e+06	6.10999e+06	6.11556e+06	6.97122e+06	6.9658e+06	6.97623e+06	3.79148e+06	3722277	3.85762e+06	6.48666e+06	6.48296e+06	6.49088e+06	6.39209e+06	6.38881e+06	6.39617e+06	3.31485e+06	3.18848e+06	3.40235e+06	8.51022e+06	8507979	8.51239e+06	8.66663e+06	8663982	8.66944e+06	7.36422e+06	7.34803e+06	7.37628e+06	7.99269e+06	7.98876e+06	7.99633e+06	8.7405e+06
14000000	5.58567e+06	5.54587e+06	5.61819e+06	5.86303e+06	5.84216e+06	5.91611e+06	5.5558e+06	5.40801e+06	5.76771e+06	7.05196e+06	7.04969e+06	7053881	6.4593e+06	6.45717e+06	6.46162e+06	6.12108e+06	5.97371e+06	6.19103e+06	6.32942e+06	6.32655e+06	6.33276e+06	7.26263e+06	7.25589e+06	7.26958e+06	3.88295e+06	3.80434e+06	3.96012e+06	6.73455e+06	6.72987e+06	6.73957e+06	6.63359e+06	6.63011e+06	6.6382e+06	3.38793e+06	3.25085e+06	3.48543e+06	8938492	8.9361e+06	8.94083e+06	9.1135e+06	9.11048e+06	9.11652e+06	7.69519e+06	7.67403e+06	7.7094e+06	8.37178e+06	8.3676e+06	8.37585e+06	9.19291e+06
15000000	5.74594e+06	5.69928e+06	5.779e+06	6.04079e+06	6.01601e+06	6.10762e+06	5.72429e+06	5.55852e+06	5.9754e+06	7.29993e+06	7.29754e+06	7.30212e+06	6.66393e+06	6.66173e+06	6.66651e+06	6.32151e+06	6154690	6.40002e+06	6530463	6.52727e+06	6.53427e+06	7.53745e+06	7.52885e+06	7547833	3.96625e+06	3.87995e+06	4.05457e+06	6.96574e+06	6.96032e+06	6.97184e+06	6.85914e+06	6.85554e+06	6.86448e+06	3.45434e+06	3.30724e+06	3.56168e+06	9347041	9.3446e+06	9.34964e+06	9.54111e+06	9.5377e+06	9544343	8008416	7.98167e+06	8.0259e+06	8731770	8.72731e+06	8.73623e+06	9.62573e+06
16000000	5.89441e+06	5.84084e+06	5.92868e+06	6.20539e+06	6.17707e+06	6.28483e+06	5.88248e+06	5.69746e+06	6.17404e+06	7.532e+06	7.52942e+06	7.5344e+06	6853890	6.85152e+06	6.85672e+06	6.50855e+06	6.32037e+06	6.59561e+06	6.7177e+06	6.7138e+06	6.72182e+06	7.79627e+06	7.78529e+06	7.81065e+06	4.04245e+06	3.94848e+06	4.14238e+06	7.18216e+06	7.17532e+06	7.18954e+06	7.07002e+06	7.0658e+06	7.07666e+06	3.51497e+06	3.35846e+06	3.63196e+06	9.73743e+06	9.73485e+06	9.74026e+06	9.9509e+06	9.94702e+06	9954296	8305512	8.2713e+06	8.32668e+06	9.07395e+06	9.0694e+06	9.07895e+06	1.00405e+07
17000000	6.03241e+06	5.97186e+06	6.0699e+06	6.35827e+06	6.3267e+06	6.45253e+06	6.03173e+06	5.82614e+06	6.36464e+06	7749584	7.74689e+06	7.75223e+06	7.03068e+06	7.02802e+06	7.03377e+06	6.68355e+06	6.47389e+06	6.77908e+06	6.89228e+06	6.88769e+06	6.89691e+06	8.04054e+06	8026956	8.06001e+06	4.11244e+06	4.01085e+06	4.22411e+06	7.38465e+06	7.37774e+06	7.3932e+06	7.26803e+06	7.2628e+06	7.2778e+06	3.57074e+06	3.40559e+06	3.69697e+06	1.01109e+07	1.01082e+07	1.0114e+07	1.03441e+07	10339768	1.03477e+07	8.58686e+06	8.53795e+06	8.61167e+06	9399972	9.39518e+06	9.40535e+06	1.04384e+07
18000000	6160724	6.0935e+06	6.20176e+06	6501448	6466109	6.61105e+06	6.17233e+06	5.94565e+06	6.54802e+06	7.95403e+06	7.95127e+06	7.95694e+06	7.19573e+06	7.19262e+06	7.19896e+06	6.84764e+06	6.61653e+06	6951560	7.0557e+06	7.05024e+06	7.06092e+06	8.27175e+06	8.25652e+06	8295492	4.17695e+06	4.06752e+06	4.30034e+06	7.5755e+06	7567977	7585489	7.45407e+06	7.44776e+06	7467737	3622257	3.45006e+06	3.7573e+06	10468645	1.04657e+07	10472084	1.07219e+07	1.07171e+07	1.07257e+07	8.85448e+06	8.79279e+06	8.88329e+06	9.71071e+06	9705619	9.71669e+06	1.08206e+07
19000000	6.28059e+06	6.20653e+06	6.32535e+06	6.63509e+06	6.59631e+06	6.75032e+06	6.30473e+06	6056946	6724923	8146616	8.14366e+06	8149657	7.34968e+06	7.34636e+06	7.35334e+06	7.00173e+06	6.74937e+06	7114022	7.20869e+06	7.20266e+06	7.21474e+06	8.49081e+06	8474117	8.51823e+06	4.2366e+06	4.11943e+06	4.36907e+06	7.75521e+06	7.7457e+06	7.76745e+06	7.62912e+06	7.62195e+06	7.64485e+06	3.66986e+06	3.49124e+06	3.81348e+06	1.08116e+07	1.08085e+07	1.08155e+07	1.1085e+07	1.10799e+07	1.10892e+07	9.10934e+06	9.03085e+06	9142530	1.00078e+07	1.00015e+07	1.00142e+07	1.1188e+07
20000000	6392831	6.31073e+06	6.44305e+06	6.75986e+06	6.71818e+06	6.88513e+06	6.42969e+06	6160849	6.89595e+06	8.32824e+06	8.32514e+06	8.33141e+06	7.49423e+06	7.49028e+06	7.49837e+06	7.14656e+06	6.87337e+06	7.26733e+06	7.35257e+06	7.34596e+06	7.35955e+06	8.69933e+06	8.68071e+06	8.72871e+06	4.29193e+06	4.16715e+06	4.4332e+06	7.92462e+06	7.91198e+06	7.9397e+06	7.7943e+06	7.78632e+06	7.81766e+06	3.71398e+06	3.52927e+06	3.86592e+06	1.11409e+07	1.11376e+07	1.11452e+07	1.14346e+07	1.14293e+07	1.14393e+07	9.3521e+06	9.25311e+06	9.39013e+06	1.02918e+07	1.02847e+07	1.02985e+07	1.15418e+07
21000000	6.49818e+06	6.40794e+06	6.55445e+06	6.87668e+06	6.83252e+06	7012160	6.54784e+06	6.25807e+06	7061623	8.49994e+06	8496610	8503269	7.63016e+06	7.62522e+06	7.63452e+06	7.28349e+06	6.98899e+06	7.41225e+06	7.48834e+06	7.48056e+06	7.49658e+06	8.89767e+06	8.8717e+06	8.92955e+06	4.3434e+06	4.21115e+06	4.49313e+06	8.08519e+06	8.06767e+06	8.10242e+06	7.95035e+06	7.94122e+06	7.98354e+06	3.75501e+06	3.5645e+06	3915002	11457362	1.14538e+07	1.1462e+07	1.17717e+07	1.17659e+07	1.17766e+07	9.58393e+06	9461526	9.62696e+06	1.05637e+07	1.05554e+07	1.05708e+07	1.18825e+07
22000000	6.59732e+06	6.49882e+06	6659815	6.98731e+06	6939442	7.13061e+06	6659782	6.34925e+06	7222410	8.6624e+06	8.65876e+06	8.66596e+06	7.75789e+06	7.75207e+06	7.76261e+06	7.41324e+06	7.09526e+06	7.54883e+06	7.61576e+06	7.6064e+06	7.62526e+06	9.08698e+06	9055574	9.12134e+06	4.3914e+06	4.25184e+06	4.54927e+06	8.23727e+06	8215691	8.25649e+06	8.09814e+06	8.0875e+06	8.14094e+06	3.79324e+06	3.59724e+06	3.96105e+06	1.17618e+07	1.17579e+07	1.17668e+07	1.20967e+07	1.20906e+07	1.21021e+07	9.8053e+06	9.65703e+06	9.85371e+06	1.08241e+07	1.08145e+07	1.08321e+07	12211075
23000000	6690769	6.58396e+06	6.75944e+06	7.09122e+06	7.03978e+06	7.24004e+06	6766012	6434919	7.37871e+06	8.81658e+06	8.81239e+06	8.82036e+06	7.87835e+06	7.87125e+06	7.88342e+06	7.53604e+06	7.19338e+06	7.67831e+06	7.7358e+06	7.7233e+06	7.74779e+06	9.26758e+06	9230856	9304553	4436275	4.28956e+06	4.60197e+06	8.3812e+06	8.35518e+06	8.403e+06	8238240	8.22551e+06	8.29119e+06	3.82897e+06	3.62774e+06	4.00434e+06	1.2055e+07	1.20506e+07	1.20602e+07	12410605	1.24041e+07	1.24164e+07	1.00172e+07	9.84057e+06	1.0071e+07	11073743	1.1063e+07	1.10835e+07	1.25281e+07
24000000	6.77899e+06	6.66377e+06	6852664	7.18949e+06	7.13469e+06	7.33952e+06	6.86699e+06	6.51557e+06	7.53086e+06	8.96277e+06	8.95815e+06	8.96705e+06	7.99199e+06	7.98312e+06	7.9977e+06	7.65243e+06	7.28587e+06	7.80123e+06	7.84975e+06	7.83483e+06	7.865e+06	9.43995e+06	9.3979e+06	9.47995e+06	4.47832e+06	4.32464e+06	4.65154e+06	8.51824e+06	8.48747e+06	8.54249e+06	8.37139e+06	8.35694e+06	8.43302e+06	3.86244e+06	3.65565e+06	4.04512e+06	1.23375e+07	1.23325e+07	1.2343e+07	1.27139e+07	12707009	12720079	1.02207e+07	1.00131e+07	1.02796e+07	1.1313e+07	1.13014e+07	1.13263e+07	1.28344e+07
25000000	6.86236e+06	6.73861e+06	6.94113e+06	7.28255e+06	7.22479e+06	7.43318e+06	6.96311e+06	6.59162e+06	7.67918e+06	9.10169e+06	9.09666e+06	9.10657e+06	8099373	8.08865e+06	8.10592e+06	7.76225e+06	7.37597e+06	7918086	7.95779e+06	7.94123e+06	7.97559e+06	9.6049e+06	9.55609e+06	9.64853e+06	4.5178e+06	4.35732e+06	4698253	8.64893e+06	8.61285e+06	8.6755e+06	8.49802e+06	8.48227e+06	8.57283e+06	3.89384e+06	3.68088e+06	4.08361e+06	12609954	1.26042e+07	1.26158e+07	1.30073e+07	1.29996e+07	1.30138e+07	1.04144e+07	1.01763e+07	1.04799e+07	1.1543e+07	1.15276e+07	1.15588e+07	1.31303e+07
26000000	6.94127e+06	6809056	7.02477e+06	7.3702e+06	7.31005e+06	7.52159e+06	7.05474e+06	6663472	7.82394e+06	9.23395e+06	9.22846e+06	9.23944e+06	8.20116e+06	8.18848e+06	8.20846e+06	7.86661e+06	7.46104e+06	8.02933e+06	8.05974e+06	8.04203e+06	8.08044e+06	9.7629e+06	9.70538e+06	9810977	4.55493e+06	4387834	4.74235e+06	8.77338e+06	8.73109e+06	8.80249e+06	8618462	8.60185e+06	8.70699e+06	3.92338e+06	3.70451e+06	4.12e+06	1.28728e+07	1.28659e+07	1.28792e+07	1.32909e+07	1.32812e+07	13298114	10601443	10332541	10672448	1.17644e+07	11744245	1.1782e+07	1.34167e+07
27000000	7.01588e+06	6.87548e+06	7.10436e+06	7.45366e+06	7.39087e+06	7.61117e+06	7.1422e+06	6731456	7.96539e+06	9.36017e+06	9.35419e+06	9.36613e+06	8.29768e+06	8.28187e+06	8.30676e+06	7.96591e+06	7.54147e+06	8.13541e+06	8.15725e+06	8.13785e+06	8.18013e+06	9.91445e+06	9.84745e+06	9.96723e+06	4.58994e+06	4.41639e+06	4.78404e+06	8.89198e+06	8842636	8.92389e+06	8.73309e+06	8.71599e+06	8.83225e+06	3.95122e+06	3.7267e+06	4.15446e+06	1.31267e+07	13118557	1.31339e+07	1.35655e+07	1.35546e+07	1.35741e+07	1.07811e+07	1.04761e+07	1.08585e+07	1.19775e+07	11951088	1.1997e+07	1.36941e+07
28000000	7086679	6.93822e+06	7.18022e+06	7.53293e+06	7.46758e+06	7.70136e+06	7.22434e+06	6.79588e+06	8.10373e+06	9.48052e+06	9.47378e+06	9487040	8389398	8.37025e+06	8.39985e+06	8.06051e+06	7.61739e+06	8.23712e+06	8.24963e+06	8.22907e+06	8.27527e+06	1.00599e+07	9.98264e+06	1.01176e+07	4.62298e+06	4443175	4.82353e+06	9.00495e+06	8.94835e+06	9.04009e+06	8.84207e+06	8.8252e+06	8.94914e+06	3.97749e+06	3.74757e+06	4.18715e+06	1.33719e+07	1.33623e+07	1.33807e+07	13831575	1.38194e+07	1.38422e+07	1.0953e+07	1.06101e+07	1.1038e+07	1.21829e+07	1.21491e+07	1.22052e+07	1.39625e+07
29000000	7.15425e+06	6.99755e+06	7.25262e+06	7608329	7.54049e+06	7.77988e+06	7.30231e+06	6.85701e+06	8.23916e+06	9.59528e+06	9.58734e+06	9.60282e+06	8.47669e+06	8.45422e+06	8.48781e+06	8.15073e+06	7.68936e+06	8.33441e+06	8.33815e+06	8313045	8.36646e+06	1.01997e+07	1.0116e+07	1.02625e+07	4.65429e+06	4.46833e+06	4.86097e+06	9.11286e+06	9.04862e+06	9.15145e+06	8.94686e+06	8.92976e+06	9.05943e+06	4.00233e+06	3.76724e+06	4.2182e+06	1.36093e+07	1.35981e+07	1.36196e+07	1.40895e+07	1.40768e+07	1.41025e+07	1.11177e+07	1.07401e+07	1.1211e+07	1.23813e+07	12337739	1.24062e+07	1.42227e+07
30000000	7.2186e+06	7.05375e+06	7.32181e+06	7.68012e+06	7.60987e+06	7.85354e+06	7.37763e+06	6.9151e+06	8.37185e+06	9.70512e+06	9695910	9.71391e+06	8.55982e+06	8.53392e+06	8.57168e+06	8.23736e+06	7.7577e+06	8.42748e+06	8.42267e+06	8.3932e+06	8.45377e+06	1.03342e+07	1.02445e+07	1.04021e+07	4.68398e+06	4.49201e+06	4.89654e+06	9.21634e+06	9.14382e+06	9.25828e+06	9.04664e+06	9.02981e+06	9.16469e+06	4.02585e+06	3.78581e+06	4.24773e+06	13839347	1.38268e+07	1.38502e+07	1.434e+07	1.43231e+07	1.43555e+07	1.12776e+07	1.08717e+07	1.13778e+07	1.25728e+07	1.25203e+07	1.26003e+07	1.44751e+07
31000000	7.27986e+06	7.10669e+06	7.388e+06	7.74852e+06	7.67598e+06	7923604	7.45008e+06	6.97038e+06	8.50197e+06	9.81029e+06	9799286	9.8202e+06	8.6391e+06	8.60935e+06	8.65174e+06	8.32041e+06	7.82265e+06	8516582	8.50324e+06	8.47127e+06	8.53852e+06	10463595	1.03681e+07	1.05368e+07	4.71213e+06	4514336	4.93036e+06	9.3156e+06	9.23427e+06	9.36087e+06	9142493	9.12564e+06	9.26483e+06	4048209	3.80337e+06	4275860	1.40618e+07	1.40481e+07	1.40733e+07	1.45831e+07	1.45611e+07	1.46014e+07	1.14318e+07	1.10075e+07	1.15377e+07	1.27581e+07	1.26973e+07	1.2788e+07	14719852
32000000	7.33833e+06	7.15635e+06	7.45139e+06	7.8138e+06	7739047	7.99036e+06	7.51959e+06	7.02303e+06	8.62965e+06	9.91099e+06	9.89703e+06	9.92214e+06	8.71473e+06	8.68221e+06	8.72855e+06	8.39989e+06	7.88448e+06	8.60198e+06	8.5804e+06	8.547e+06	8.61993e+06	1.05883e+07	1.0487e+07	1.06674e+07	4.73888e+06	4.53541e+06	4.96257e+06	9.41064e+06	9320282	9.4595e+06	9.2344e+06	9.21662e+06	9.35819e+06	4.06945e+06	3.81998e+06	4.3029e+06	1.42774e+07	1.42624e+07	1.4291e+07	1.48186e+07	1.47891e+07	1.4841e+07	1.15804e+07	11136670	1.16921e+07	1.29379e+07	1.28718e+07	1.29694e+07	14957020
33000000	7.39421e+06	7.20354e+06	7.51218e+06	7.87619e+06	7.79927e+06	8.05405e+06	7.58634e+06	7.07324e+06	8.75503e+06	1.00074e+07	9.9906e+06	10020564	8.787e+06	8.75225e+06	8.80129e+06	8.47603e+06	7.9434e+06	8.68393e+06	8.65411e+06	8.61955e+06	8.69823e+06	1.07087e+07	1.06015e+07	1.07939e+07	4.76432e+06	4.55535e+06	4.99327e+06	9.50164e+06	9.40215e+06	9.55439e+06	9.3226e+06	9.30378e+06	9447281	4.08964e+06	3.83568e+06	4.32886e+06	1.44865e+07	1.44701e+07	1.45011e+07	1.50478e+07	1.5008e+07	15073420	1.17237e+07	1.12605e+07	1.18413e+07	1.31114e+07	1.3036e+07	1.31449e+07	1.51877e+07
34000000	7.4477e+06	7.24844e+06	7.57053e+06	7.93581e+06	7.85662e+06	8.1149e+06	7.65048e+06	7.12118e+06	8.87822e+06	1.01003e+07	1.00804e+07	1.01153e+07	8.85612e+06	8.81962e+06	8.87078e+06	8.54923e+06	7.99961e+06	8.76271e+06	8.72505e+06	8689072	8.77375e+06	1.08249e+07	1.07117e+07	1.09167e+07	4.78855e+06	4574223	5.02257e+06	9.5891e+06	9.48013e+06	9.64579e+06	9.40732e+06	9.38745e+06	9.53253e+06	4.10887e+06	3.8506e+06	4.35369e+06	14689107	1.46708e+07	1.4705e+07	1.52698e+07	1.52222e+07	1.52986e+07	1.18621e+07	1.13797e+07	1.19856e+07	1.32784e+07	1.31921e+07	1.33149e+07	1.54116e+07
35000000	7.49886e+06	7.29107e+06	7.62666e+06	7.99264e+06	7.91117e+06	8.1731e+06	7.71219e+06	7.16701e+06	8.99933e+06	10189386	10166345	1.02063e+07	8.9223e+06	8.88398e+06	8.93773e+06	8.61961e+06	8.05329e+06	8.8384e+06	8.79313e+06	8.75576e+06	8.84666e+06	1.09372e+07	10818036	1.10358e+07	4.81165e+06	4.59212e+06	5.05056e+06	9.67315e+06	9.55448e+06	9.73389e+06	9.48879e+06	9.46745e+06	9.61427e+06	4.12706e+06	3864778	4.37745e+06	1.48861e+07	14862104	14903008	1.5487e+07	1.54306e+07	1.55182e+07	1.19958e+07	1.14885e+07	1.21252e+07	1.34408e+07	13344235	1.34795e+07	1.56296e+07
36000000	7.54793e+06	7.33148e+06	7.6815e+06	8.0471e+06	7.96338e+06	8.22884e+06	7.77159e+06	7.21085e+06	9.11846e+06	1.02752e+07	10249002	1.02942e+07	8.98567e+06	8.94553e+06	9.00197e+06	8687222	8.10461e+06	8.91119e+06	8.85816e+06	8819765	8.91701e+06	1.10456e+07	1.09205e+07	11151263	4.8337e+06	4.60912e+06	5.07733e+06	9.75413e+06	9.62543e+06	9.81888e+06	9.56732e+06	9.54435e+06	9.69279e+06	4.14435e+06	3.87828e+06	4.40021e+06	1.5077e+07	1.50467e+07	1.50953e+07	1.56985e+07	1.56331e+07	1.57322e+07	1.2125e+07	1.15891e+07	1.22604e+07	1.35977e+07	1.34906e+07	1.36391e+07	1.58422e+07
37000000	7.59501e+06	7.37001e+06	7.73432e+06	8099341	8.01339e+06	8.28226e+06	7828824	7.25283e+06	9.2357e+06	1.03578e+07	1.03292e+07	1.0379e+07	9.04642e+06	9.00457e+06	9.06409e+06	8.75222e+06	8153713	8.98125e+06	8920646	8.88125e+06	8.98496e+06	1.11505e+07	1.10194e+07	11263329	4.85477e+06	4.62529e+06	5102965	9.83227e+06	9.69318e+06	9.90093e+06	9.64286e+06	9.61864e+06	9.76833e+06	4.16086e+06	3.89115e+06	4.42204e+06	1.52625e+07	1.52282e+07	15282277	1.5904e+07	1.58341e+07	1.59412e+07	1.225e+07	1.16861e+07	1.23914e+07	1.37496e+07	1.36269e+07	1.37938e+07	1.60488e+07
38000000	7.64021e+06	7.40679e+06	7.78523e+06	8.14949e+06	8061347	8.33353e+06	7.88401e+06	7.29307e+06	9.35113e+06	1.04373e+07	1.04054e+07	1.04608e+07	9.10459e+06	9.06125e+06	9.12407e+06	8.81453e+06	8.20075e+06	9048718	8980887	8.94035e+06	9.05063e+06	1.12519e+07	1.1115e+07	11372166	4.87492e+06	4.64067e+06	5.12753e+06	9.90759e+06	9.76081e+06	9.98021e+06	9.71575e+06	9.69033e+06	9.84111e+06	4.17665e+06	3903426	4442994	1.54433e+07	1.54044e+07	1.54641e+07	1.61041e+07	1.60321e+07	1.61463e+07	1.2371e+07	1.17797e+07	1.25183e+07	1.38969e+07	13762131	1.3944e+07	1.62498e+07
39000000	7.68365e+06	7.44193e+06	7834337	8.19767e+06	8.10737e+06	8382776	7.93726e+06	7.33167e+06	9.46483e+06	1.0514e+07	1.04785e+07	1.05398e+07	9.1606e+06	9.11576e+06	9.18176e+06	8.87423e+06	8.24584e+06	9113745	9038948	8.9972e+06	9114148	1.13502e+07	1.12073e+07	11477937	4.89422e+06	4.65533e+06	5.15112e+06	9.98024e+06	9.82686e+06	1.00569e+07	9.78603e+06	9.75945e+06	9911296	4.19176e+06	3.91516e+06	4.46312e+06	1.56191e+07	1.55754e+07	1.56409e+07	1.62987e+07	1.62229e+07	1.63454e+07	1.24882e+07	1.18701e+07	1.26415e+07	1.40398e+07	1.38883e+07	1.40898e+07	1.64459e+07
40000000	7.72543e+06	7475536	7881747	8.24408e+06	8.15157e+06	8430113	7.98867e+06	7.36874e+06	9.57688e+06	1.0588e+07	1.05476e+07	1.0616e+07	9.21453e+06	9168221	9.23727e+06	8.93174e+06	8.28911e+06	9.17646e+06	9.09488e+06	9.05194e+06	9.17564e+06	1.14453e+07	1.12966e+07	1.15808e+07	4.91271e+06	4.66932e+06	5.17379e+06	1.00504e+07	9.89028e+06	1.0131e+07	9.85388e+06	9.8261e+06	9.98055e+06	4.20624e+06	3.92637e+06	4482475	1.57899e+07	1.57414e+07	1.58131e+07	1.64878e+07	1.64067e+07	1.65397e+07	1.26017e+07	1.19564e+07	1.27609e+07	1.41785e+07	1.40082e+07	1.42314e+07	1.66371e+07
41000000	7.76564e+06	7.50771e+06	7.92755e+06	8.28887e+06	8.19406e+06	8.47566e+06	8.03834e+06	7404364	9.68733e+06	1.06594e+07	1.0614e+07	1.06897e+07	9266452	9.21874e+06	9.29072e+06	8.98718e+06	8.33065e+06	9.23699e+06	9.14876e+06	9.10466e+06	9.23521e+06	11537270	1.1383e+07	1.16809e+07	4.93045e+06	4682679	5.19557e+06	1.01181e+07	9.95079e+06	1.02028e+07	9919493	9.89043e+06	1.00483e+07	4.22012e+06	3.93711e+06	4.5011e+06	1.59562e+07	1.59026e+07	1.59807e+07	1.6672e+07	1.65835e+07	1.67294e+07	1.27118e+07	1.20371e+07	1.28769e+07	1.43134e+07	1.41235e+07	1.43691e+07	16823380
42000000	7.80437e+06	7.53853e+06	7.97183e+06	8331997	8.23493e+06	8.51951e+06	8.08637e+06	7.43862e+06	9796259	1.07284e+07	10677980	1.07609e+07	9.31643e+06	9.26744e+06	9.34221e+06	9.04067e+06	8370585	9.29545e+06	9200388	9.15549e+06	9.29295e+06	1.16263e+07	1.14658e+07	1.17783e+07	4.94747e+06	4.69545e+06	5.21651e+06	1.01835e+07	1.00078e+07	1.02724e+07	9.98276e+06	9.95256e+06	1.01138e+07	4.23345e+06	3.9474e+06	4519026	1.61177e+07	1.60592e+07	1.61439e+07	1.6853e+07	1.67556e+07	1.69148e+07	12818519	1.21149e+07	1.29895e+07	1.44445e+07	1.42345e+07	1.45029e+07	1.70049e+07
43000000	7.84171e+06	7569537	8.01466e+06	8373561	8.27428e+06	8.56176e+06	8132829	7.47159e+06	9.90371e+06	1.0795e+07	1.07397e+07	1.08298e+07	9.36459e+06	9.3144e+06	9.39186e+06	9.0923e+06	8.40899e+06	9.35193e+06	9.25012e+06	9.20452e+06	9.34896e+06	1.17125e+07	1.15456e+07	1.18732e+07	4.96384e+06	4.70767e+06	5.23667e+06	1.02468e+07	1.00588e+07	1.03399e+07	1.00438e+07	1.00126e+07	1.01773e+07	4.2463e+06	3.95726e+06	4.5363e+06	16274955	1.62115e+07	1.6303e+07	1.70289e+07	1.69234e+07	1.70959e+07	1.29221e+07	1.219e+07	1.30989e+07	1.45726e+07	14341416	1.4633e+07	1.71814e+07
44000000	7.87772e+06	7.60062e+06	8.05613e+06	8.41364e+06	8.31218e+06	8.60251e+06	8.1778e+06	7.50335e+06	1.00097e+07	1.08594e+07	1.07994e+07	1.08965e+07	9.41096e+06	9.35972e+06	9.43977e+06	9.14216e+06	8.44596e+06	9.40654e+06	9298135	9.25184e+06	9.40333e+06	1.17961e+07	11622900	1.19658e+07	4.97957e+06	4.71937e+06	5.25607e+06	10308093	1.01074e+07	1.04053e+07	1.01029e+07	1.00707e+07	1.0239e+07	4.25871e+06	3.96673e+06	4.55296e+06	1.64281e+07	1.63595e+07	1.64581e+07	17200983	1.70872e+07	17273062	1.30229e+07	1.22626e+07	13205404	1.46966e+07	1.44447e+07	1.47596e+07	1.73542e+07
45000000	7.91249e+06	7.63056e+06	8.09629e+06	8.45232e+06	8.34871e+06	8.64183e+06	8.22136e+06	7.53395e+06	1.01144e+07	1.09218e+07	10857553	1.09611e+07	9.45568e+06	9.40348e+06	9.48605e+06	9.19036e+06	8.48156e+06	9.45937e+06	9.34505e+06	9.29758e+06	9.45614e+06	11877265	1.16978e+07	1.2056e+07	4.99471e+06	4.7306e+06	5.27477e+06	1.03674e+07	1.01538e+07	10468753	1.01601e+07	1.01269e+07	1.02988e+07	4.27065e+06	3.97583e+06	4.56904e+06	1.65777e+07	1.65035e+07	1.66094e+07	1.73695e+07	1.72471e+07	1.74463e+07	1.31209e+07	1.23327e+07	1.3309e+07	1.48177e+07	1.45445e+07	14882921	1.75232e+07
46000000	7.94606e+06	7.6594e+06	8.13521e+06	8.48967e+06	8.38394e+06	8.67984e+06	8.26356e+06	7.56347e+06	1.02178e+07	1.09822e+07	1.09139e+07	11023667	9.49886e+06	9.44576e+06	9.53075e+06	9.23696e+06	8515884	9.51051e+06	9.38997e+06	9.34178e+06	9.50747e+06	1.19561e+07	1.17704e+07	1.2144e+07	5.00929e+06	4.74136e+06	5.29281e+06	1.04248e+07	1.01982e+07	1.05304e+07	1.02155e+07	1.01813e+07	1.03567e+07	4.28214e+06	3.98457e+06	4584564	1.67236e+07	16643699	1.67569e+07	1.75346e+07	17407055	1.76157e+07	1.32161e+07	1.24005e+07	13409704	1.49355e+07	1.46412e+07	1.5003e+07	1.76884e+07
47000000	7.9785e+06	7.68721e+06	8.17295e+06	8.52561e+06	8.41795e+06	8.71658e+06	8.30449e+06	7591955	1.03198e+07	1.10406e+07	1.09687e+07	1.10843e+07	9.54055e+06	9486629	9.57398e+06	9.28206e+06	8.54899e+06	9.56003e+06	9.4333e+06	9.38452e+06	9.55738e+06	1.20327e+07	1.18409e+07	1.22299e+07	5.02333e+06	4.7517e+06	5.31021e+06	10480436	10240632	1.05903e+07	1.02692e+07	1.0234e+07	1.0413e+07	4.29322e+06	3992984	4.59956e+06	1.68662e+07	1.67803e+07	1.69009e+07	1.76957e+07	1.75616e+07	1.77815e+07	1.33087e+07	1.24662e+07	1.35078e+07	1.50502e+07	1.4735e+07	1.51199e+07	1.78489e+07
48000000	8.00988e+06	7.71405e+06	8.20957e+06	8560321	8.45079e+06	8.75243e+06	8.34418e+06	7.61946e+06	1.04207e+07	1.10973e+07	1.10219e+07	1.11431e+07	9.58089e+06	9.52616e+06	9.6158e+06	9.32571e+06	8.58093e+06	9.60801e+06	9.47524e+06	9.42588e+06	9.60595e+06	1.21072e+07	1.19093e+07	1.23138e+07	5.03688e+06	4.76163e+06	5.32701e+06	1.05344e+07	1.02812e+07	1.06485e+07	1.03212e+07	1.02851e+07	1.04676e+07	4.3039e+06	4.00108e+06	4.61406e+06	1.70056e+07	1.6913e+07	1.70415e+07	1.78529e+07	1.77141e+07	1.79438e+07	1.33987e+07	1.25298e+07	1.36032e+07	1.5162e+07	1.48288e+07	1.52339e+07	1.80057e+07
49000000	8.04023e+06	7739951	8245120	8.59389e+06	8.48253e+06	8.78757e+06	8.38271e+06	7.64604e+06	1.05203e+07	1.11523e+07	1.10736e+07	1.12002e+07	9.61982e+06	9.56441e+06	9.65628e+06	9.36799e+06	8.61178e+06	9.65452e+06	9.51604e+06	9.46591e+06	9.65324e+06	1.21797e+07	1.19757e+07	1.23958e+07	5.04996e+06	4.77119e+06	5.34324e+06	1.05867e+07	1.03199e+07	1.07051e+07	1.03717e+07	1.03346e+07	10520571	4.31421e+06	4.00889e+06	4.62808e+06	1.71412e+07	1.70421e+07	1.71788e+07	1.80067e+07	1.78631e+07	1.81026e+07	1.34862e+07	1.25915e+07	13696244	1.52709e+07	1.49212e+07	1.5345e+07	1.8159e+07
50000000	8.06961e+06	7.76497e+06	8.27964e+06	8.62638e+06	8.51321e+06	8.82159e+06	8.41949e+06	7.67174e+06	1.06188e+07	11205562	1.11239e+07	1.12556e+07	9.65743e+06	9.60144e+06	9.6955e+06	9.40897e+06	8.6416e+06	9.69963e+06	9.55562e+06	9.50469e+06	9.6993e+06	1.22502e+07	1.20402e+07	1.24741e+07	5.06251e+06	4780380	5.35893e+06	10637421	1.03571e+07	1.07602e+07	1.04207e+07	1.03826e+07	1.05721e+07	4.32416e+06	4.01641e+06	4.64166e+06	17273714	1.71681e+07	1.73129e+07	1.81571e+07	1.80089e+07	1.82584e+07	1.35714e+07	1.26512e+07	13786865	1.53772e+07	1.50117e+07	1.54534e+07	1.83095e+07
51000000	8098074	7.78916e+06	8.31319e+06	8.65784e+06	8.54289e+06	8.85453e+06	8.45462e+06	7.6966e+06	1.07161e+07	1.12573e+07	1.11729e+07	1.13094e+07	9.69392e+06	9.63731e+06	9.73353e+06	9448691	8670418	9.7434e+06	9.59387e+06	9.54226e+06	9744190	1.23188e+07	1.21029e+07	1.25502e+07	5.07462e+06	4.78924e+06	5.3741e+06	1.06867e+07	1.03958e+07	1.08138e+07	1.04683e+07	1.04292e+07	10622147	4333767	4.02367e+06	4654800	1.74031e+07	1.7291e+07	1.74439e+07	1.83043e+07	18151398	1.84112e+07	1.36544e+07	1.27093e+07	1.38752e+07	1.54807e+07	1.51e+07	1.55591e+07	1.84568e+07
52000000	8.12565e+06	7.81255e+06	8.34487e+06	8.68832e+06	8.57162e+06	8.88644e+06	8.48873e+06	7.72066e+06	1.08124e+07	1.13073e+07	1.12206e+07	1.13616e+07	9.72927e+06	9.67207e+06	9.77095e+06	9.48723e+06	8.6983e+06	9.78589e+06	9630971	9.57869e+06	9.78797e+06	1.23856e+07	1.21638e+07	12624569	5086330	4.79777e+06	5.38879e+06	1.07345e+07	1.04332e+07	1.0866e+07	1.05146e+07	1.04745e+07	1.06708e+07	4343058	4.03068e+06	4.66753e+06	1.75295e+07	1.7411e+07	1.75722e+07	18448499	1.82909e+07	1.85609e+07	1.37352e+07	1.27656e+07	1.39613e+07	15581631	1.51866e+07	1.56623e+07	1.86009e+07
53000000	8.15239e+06	7835183	8375588	8717856	8.59943e+06	8.91738e+06	8.52185e+06	7.74395e+06	10907617	1.13558e+07	1.12671e+07	1.14124e+07	9.76353e+06	9.70576e+06	9.8073e+06	9.52462e+06	8.72529e+06	9.82716e+06	9.66697e+06	9.61403e+06	9830674	1.24507e+07	1.22231e+07	1.26972e+07	5097653	4.806e+06	5.40301e+06	1.07809e+07	1.04692e+07	1.09169e+07	1.05595e+07	1.05185e+07	1.07182e+07	4.35204e+06	4.03744e+06	4.67988e+06	1.76531e+07	1.75292e+07	1.76979e+07	1.85895e+07	1.84271e+07	1.87077e+07	1.38139e+07	1.28204e+07	1.40453e+07	15679948	1.52715e+07	1.5763e+07	1.87419e+07
54000000	8.17852e+06	7.85709e+06	8.40544e+06	8.74648e+06	8.62639e+06	8.94739e+06	8.55404e+06	7.76653e+06	11001792	1.14029e+07	1.13124e+07	1.14618e+07	9.79675e+06	9.73844e+06	9.84263e+06	9.56093e+06	8.75142e+06	9.86725e+06	9.70191e+06	9.64833e+06	9.87236e+06	1.25141e+07	1.22808e+07	1.27681e+07	5.10861e+06	4.81394e+06	5.41679e+06	1.08261e+07	1.0504e+07	1.09664e+07	1.06033e+07	1.05612e+07	1.07643e+07	4.36074e+06	4043987	4.69185e+06	1.7774e+07	1.76451e+07	1.78208e+07	18727636	1.85604e+07	1.88515e+07	1.38906e+07	1.28736e+07	1.41273e+07	1.57761e+07	1.53547e+07	1.58614e+07	1.888e+07
55000000	8.20396e+06	7.87832e+06	8.43446e+06	8.77415e+06	8.65251e+06	8.97651e+06	8585323	7.78841e+06	1.1095e+07	1.14488e+07	1.13566e+07	1.15099e+07	9.82897e+06	9.77067e+06	9876994	9.59619e+06	8.77675e+06	9.90606e+06	9.73584e+06	9.68162e+06	9.91307e+06	1.25759e+07	1.2337e+07	1.28374e+07	5.11922e+06	4.82161e+06	5.43014e+06	1.08702e+07	1.05377e+07	1.10148e+07	1.06458e+07	1.06028e+07	1.08092e+07	4.36916e+06	4.05031e+06	4.70346e+06	1.78923e+07	1.77584e+07	1.79411e+07	1.88629e+07	1.86914e+07	1.89925e+07	1.39655e+07	1.29253e+07	1.42073e+07	1.58699e+07	1.54383e+07	1.59575e+07	1.90155e+07
56000000	8.22868e+06	7.89888e+06	8.46269e+06	8.801e+06	8.67784e+06	9.00479e+06	8.61575e+06	7.80963e+06	1.11872e+07	1.14935e+07	1.13996e+07	1.15566e+07	9.86024e+06	9.80198e+06	9.91043e+06	9.63046e+06	8.80129e+06	9.94381e+06	9.76881e+06	9.71378e+06	9.95284e+06	1.26362e+07	1.23917e+07	1.29052e+07	5.1295e+06	4.82902e+06	5.44309e+06	10913104	10570244	1.10619e+07	1.06872e+07	1.06432e+07	1.08529e+07	4.37732e+06	4056436	4.71474e+06	1.8008e+07	1.78693e+07	1.80588e+07	1.89955e+07	1.88214e+07	1.91308e+07	1.40384e+07	1.29756e+07	14285436	1.59616e+07	1.55212e+07	1.60513e+07	19148318
57000000	8.25269e+06	7.91882e+06	8.49016e+06	8.82713e+06	8.70242e+06	9.03226e+06	8.64534e+06	7.83022e+06	11278408	1.1537e+07	1.14416e+07	1.16021e+07	9.8906e+06	9.83236e+06	9942974	9.66377e+06	8.8251e+06	9.98052e+06	9.80086e+06	9744967	9.99171e+06	1.2695e+07	1.2445e+07	1.29714e+07	5.13946e+06	4.83618e+06	5.45565e+06	1.09549e+07	10601810	1.11079e+07	1.07274e+07	1.06825e+07	1.08955e+07	4.38522e+06	4062363	4.72569e+06	1.81213e+07	1.79777e+07	18174035	1.91254e+07	1.89486e+07	1.92664e+07	14109575	1.30246e+07	14361723	1.60511e+07	1.56027e+07	1.61431e+07	1.92785e+07
58000000	8.27602e+06	7.93816e+06	8.5169e+06	8.85258e+06	8.72628e+06	9.05894e+06	8.67415e+06	7.85021e+06	1.13687e+07	1.15793e+07	1.14826e+07	1.16465e+07	9.92009e+06	9.86186e+06	9.97467e+06	9.69616e+06	8.8482e+06	1.00162e+07	9.83202e+06	9.77528e+06	1.00297e+07	1.27523e+07	1.24969e+07	1.30362e+07	5.14912e+06	4.84311e+06	5.46784e+06	1.09955e+07	10632404	1.11528e+07	1.07666e+07	1.07208e+07	1.0937e+07	4392887	4.0681e+06	4.73633e+06	1.82323e+07	1.80839e+07	1.82869e+07	1.92528e+07	1.90733e+07	1.93994e+07	1.4179e+07	13071951	1.44362e+07	1.61387e+07	1.56828e+07	1.62328e+07	1.94061e+07
59000000	8.29872e+06	7.95693e+06	8542939	8.87731e+06	8749440	9.08488e+06	8.70219e+06	7.86962e+06	1.14581e+07	1.16206e+07	1.15226e+07	1.16897e+07	9.94875e+06	9.89045e+06	10005544	9.72768e+06	8.87062e+06	1.0051e+07	9.86233e+06	9.80475e+06	1.00669e+07	1.28083e+07	1.25475e+07	13099661	5.15849e+06	4.84982e+06	5.47968e+06	1.10353e+07	1.06621e+07	1.11967e+07	1.08046e+07	1.0758e+07	1.09775e+07	4.40032e+06	4073668	4.74667e+06	1.8341e+07	1.81877e+07	1.83975e+07	1.93775e+07	19195524	1.953e+07	1.42468e+07	1.3118e+07	1.45091e+07	1.62243e+07	15761024	1.63205e+07	1.95309e+07
60000000	8.32079e+06	7.97515e+06	8.56831e+06	8.90135e+06	8.77194e+06	9.1101e+06	8.7295e+06	7.88847e+06	11546682	1.16607e+07	1.15599e+07	1.17318e+07	9.9766e+06	9.91823e+06	1.00356e+07	9.75835e+06	8.89239e+06	1.00849e+07	9891826	9.83342e+06	1.01033e+07	1.2863e+07	1.25969e+07	13161739	5.16759e+06	4.85631e+06	5.49118e+06	1.1074e+07	1.06909e+07	11239483	1.08417e+07	1.07943e+07	1.1017e+07	4.40754e+06	4.07906e+06	4.75672e+06	1.84474e+07	1.82922e+07	1.85058e+07	1.94997e+07	1.93153e+07	1.96581e+07	1.4313e+07	1.31629e+07	1.45803e+07	1.63076e+07	1.58333e+07	1.64063e+07	1.96532e+07
61000000	8.34227e+06	7.99285e+06	8.59303e+06	8.92473e+06	8.79381e+06	9.13464e+06	8.75611e+06	7.9068e+06	1.16344e+07	1.16998e+07	1.15954e+07	1.17728e+07	1.00037e+07	9.94524e+06	1.0065e+07	9.78821e+06	8.91355e+06	1.01179e+07	9.92054e+06	9861317	1.01389e+07	1.29164e+07	1.26451e+07	1.32225e+07	5.17642e+06	4.8626e+06	5502363	1.11118e+07	1.07188e+07	1.12813e+07	1.08777e+07	1.08297e+07	1.10557e+07	4.41455e+06	4.0843e+06	4.7665e+06	1.85515e+07	1.83961e+07	1.86119e+07	1.96198e+07	1.94322e+07	1.97838e+07	1.43777e+07	1.32066e+07	1.46498e+07	1.6389e+07	1.59042e+07	1.64903e+07	1.97729e+07
62000000	8.36318e+06	8.01004e+06	8.61712e+06	8.94749e+06	8.81507e+06	9.15852e+06	8782046	7.92462e+06	1.17212e+07	1.1738e+07	1.163e+07	1.18129e+07	1.00301e+07	9.9715e+06	1.00929e+07	9.8173e+06	8934111	1.015e+07	9.94851e+06	9.88848e+06	1.01738e+07	1.29686e+07	1.26921e+07	1.3282e+07	5.18484e+06	4.86869e+06	5.51323e+06	1.11486e+07	1.07459e+07	1.13222e+07	10912954	1.08642e+07	1.10937e+07	4.42136e+06	4.08937e+06	4.77602e+06	1.86533e+07	18497993	1.8716e+07	1.97377e+07	1.95464e+07	1.99073e+07	1.44409e+07	1.32493e+07	1.47179e+07	1.64692e+07	1.59739e+07	1.65725e+07	1.98903e+07
63000000	8383543	8026756	8640624	8.96963e+06	8.83575e+06	9.18176e+06	8.80733e+06	7.94196e+06	1.18072e+07	1.17753e+07	1.16636e+07	1.18519e+07	10055751	9.99708e+06	1.01198e+07	9845631	8.9541e+06	1.01814e+07	9.97575e+06	9.91492e+06	1.0208e+07	1.30196e+07	1.27379e+07	1.33403e+07	5.19292e+06	4.8746e+06	5.5238e+06	11184507	1.07723e+07	1.13622e+07	1.09474e+07	1.08978e+07	1.11308e+07	4.42798e+06	4.09431e+06	4.78528e+06	1.87528e+07	1.85978e+07	1.8818e+07	1.98535e+07	1.96583e+07	2.00285e+07	1.45026e+07	1.32909e+07	1.47845e+07	1.65478e+07	1.60423e+07	1.66532e+07	2.00055e+07
64000000	8403381	8.04301e+06	8.66355e+06	8.9912e+06	8855868	9.2044e+06	8.83198e+06	7.95883e+06	1.18924e+07	1.18118e+07	1.16962e+07	11890080	1.00807e+07	1.00223e+07	1.0146e+07	9.87325e+06	8.97355e+06	1.02119e+07	1.00024e+07	9.94069e+06	1.02415e+07	1.30694e+07	1.27827e+07	1.33975e+07	5.20077e+06	4.88034e+06	5.53409e+06	1.12195e+07	1.07979e+07	11401324	1.0981e+07	1.09306e+07	1.1167e+07	4434408	4.0991e+06	4.7943e+06	1.88506e+07	1.86956e+07	1.8918e+07	1.99675e+07	1.97681e+07	2.01475e+07	1.45629e+07	1.33315e+07	1.48496e+07	1.66247e+07	1.61095e+07	1.67325e+07	2.01181e+07
65000000	8.42271e+06	8.05882e+06	8.68592e+06	9.0122e+06	8.87545e+06	9.22645e+06	8.85623e+06	7.97525e+06	1.19769e+07	11847259	1.17279e+07	1.19273e+07	1.01051e+07	1.0047e+07	10171466	9.90017e+06	8992474	1.02417e+07	1.00285e+07	9.96579e+06	1.02743e+07	1.31181e+07	1.28264e+07	1.34534e+07	5.20841e+06	4.8859e+06	5.5441e+06	1.12537e+07	10822873	1.14396e+07	1.10138e+07	1.09625e+07	1.12024e+07	4.44066e+06	4.10375e+06	4.80309e+06	1.89465e+07	1.87915e+07	1.90161e+07	2.00795e+07	1.98759e+07	2.02645e+07	1.46218e+07	1.33711e+07	1.49134e+07	1.67001e+07	1.61756e+07	1.68101e+07	2.02285e+07
66000000	8.44156e+06	8.07421e+06	8.70775e+06	9.03267e+06	8.89451e+06	9.24794e+06	8.88001e+06	7.99123e+06	1.20605e+07	1.18818e+07	1.17587e+07	1.19637e+07	1.01288e+07	1.00709e+07	1.01963e+07	9.92642e+06	9.01089e+06	1.02708e+07	1.00539e+07	9.99027e+06	1.03065e+07	13165760	1.28692e+07	1.35083e+07	5.21595e+06	4.89131e+06	5553847	1.1287e+07	1.08471e+07	1.1477e+07	1.10458e+07	1.09935e+07	1.1237e+07	4.44675e+06	4.10827e+06	4.81166e+06	1.90405e+07	1.88854e+07	1.91124e+07	20189329	1.99816e+07	2.03793e+07	1.46793e+07	1.34098e+07	1.49758e+07	1.67737e+07	1.62405e+07	1.68861e+07	2.03369e+07
67000000	8.45994e+06	8.08919e+06	8.72908e+06	9.05262e+06	8.91308e+06	9.26889e+06	8.90322e+06	8.00681e+06	1.21434e+07	1.19156e+07	11788641	1.19992e+07	10151920	1.00943e+07	1.02205e+07	9.95204e+06	9028832	1.02992e+07	10078721	1.00141e+07	1.03381e+07	1.32124e+07	1.29109e+07	1.35625e+07	5.22341e+06	4.89656e+06	5.56334e+06	1.13196e+07	10870745	1.15137e+07	1.10769e+07	1.10239e+07	1.12707e+07	4.45268e+06	4.11267e+06	4.82001e+06	1.91328e+07	1.89776e+07	1.92069e+07	2.02971e+07	2.00854e+07	2.04922e+07	1.47355e+07	13447536	1.50369e+07	1.68458e+07	1.63042e+07	1.69606e+07	2.04434e+07
68000000	8.47788e+06	8.10377e+06	8.7499e+06	9.07206e+06	8.93117e+06	9.28932e+06	8.92589e+06	8.02199e+06	1.22256e+07	1.19485e+07	1.18177e+07	1.20339e+07	10174455	1.0117e+07	1.02442e+07	9.97703e+06	9.04631e+06	1.03269e+07	1.01028e+07	1.00374e+07	1.03691e+07	13257981	12951719	1.36166e+07	5.23067e+06	4.90166e+06	5.57259e+06	1.13514e+07	1.08937e+07	1.15495e+07	11107330	1.10536e+07	1.13038e+07	4.45845e+06	4116956	4.82815e+06	1.92232e+07	1.90679e+07	1.92996e+07	2.0403e+07	2.01873e+07	2.06032e+07	1.47905e+07	1.34844e+07	1.50969e+07	1.69166e+07	1.63669e+07	17033671	2.05478e+07
69000000	8.49541e+06	8117984	8.77024e+06	9.09103e+06	8.9488e+06	9.30924e+06	8.94803e+06	8.03678e+06	1.23071e+07	1.19807e+07	1.1846e+07	1.20682e+07	1.01964e+07	1.01388e+07	1.02672e+07	1.00014e+07	9.06333e+06	1.0354e+07	1.0126e+07	1.00601e+07	1.03996e+07	1.33026e+07	1.29916e+07	1.36698e+07	5.23775e+06	4906619	5.58161e+06	1.13824e+07	1.09161e+07	1.15847e+07	1.11371e+07	1.10826e+07	1.13361e+07	4464066	4.12112e+06	4.83609e+06	1.9312e+07	1.91566e+07	1.93906e+07	2.05072e+07	2.02874e+07	2.07122e+07	1.48444e+07	1.35205e+07	1.5156e+07	1.69859e+07	16428470	1.71053e+07	2.06503e+07
70000000	8512472	8131832	8.79013e+06	9.10954e+06	8.96599e+06	9.32869e+06	8.96967e+06	8.05121e+06	1.23878e+07	1.20122e+07	1.18732e+07	12101881	1.02179e+07	1.016e+07	1.02897e+07	1.00252e+07	9.07993e+06	1.03804e+07	10148663	1.00823e+07	1.04294e+07	1.33463e+07	1.30306e+07	1.37221e+07	5.24464e+06	4.91144e+06	5.59041e+06	1.14128e+07	1.0938e+07	1.16191e+07	1.11661e+07	1.11109e+07	1.13676e+07	4.46954e+06	4.12518e+06	4.84384e+06	1.93991e+07	1.92435e+07	1.948e+07	2.06096e+07	2.03845e+07	2.08194e+07	1.48971e+07	1.35558e+07	1.52139e+07	1.70539e+07	1.6489e+07	1.71755e+07	20751001
71000000	8.52892e+06	8.14533e+06	8.80956e+06	9.1276e+06	8.98275e+06	9347669	8.99082e+06	8.06528e+06	1.24679e+07	1.20429e+07	1.18996e+07	1.21348e+07	1.02388e+07	10180670	1.03116e+07	1.00485e+07	9.09611e+06	1.04062e+07	1.01708e+07	1.01039e+07	1.04588e+07	1.33889e+07	1.30688e+07	13773439	5.25137e+06	4.91614e+06	5.59898e+06	11442464	1.09593e+07	1.16528e+07	1.11945e+07	1.11386e+07	1.13985e+07	4.47488e+06	4.12913e+06	4.85141e+06	1.94846e+07	1.93288e+07	19567730	2.07103e+07	20479640	2.09248e+07	1.49487e+07	1.35903e+07	1.52707e+07	1.71205e+07	1.65485e+07	1.72444e+07	2.08499e+07
72000000	8.54495e+06	8.15849e+06	8.82857e+06	9.14523e+06	8.99911e+06	9.3662e+06	9.0115e+06	8.07901e+06	1.25472e+07	1.2073e+07	1.19252e+07	12167090	1.02592e+07	1.02009e+07	1.03331e+07	10071241	9.1119e+06	1.04315e+07	1.01926e+07	1.01251e+07	1.04876e+07	1.34307e+07	1.31061e+07	1.38239e+07	5.25792e+06	4.9207e+06	5.60735e+06	1.14715e+07	1.098e+07	1.16858e+07	1.12223e+07	1.11658e+07	1.14288e+07	4.48008e+06	4132980	4.85879e+06	1.95685e+07	19412168	1.96539e+07	2.08093e+07	20573027	2.10284e+07	1.49992e+07	1.36284e+07	1.53263e+07	1.71859e+07	16606992	1.7312e+07	2.09471e+07
73000000	8.5606e+06	8.17133e+06	8.84729e+06	9.16245e+06	9.0151e+06	9.3843e+06	9.03172e+06	8.09241e+06	1.2626e+07	1.21024e+07	11950170	1.21987e+07	1.02792e+07	1.02206e+07	1.0354e+07	1.00935e+07	9127299	1.04561e+07	1.02139e+07	1.01457e+07	1.0516e+07	1.34717e+07	1.31426e+07	1.38736e+07	5.26431e+06	4.92515e+06	5.61552e+06	1.14999e+07	1.10003e+07	1.17182e+07	1.12494e+07	1.11923e+07	1.14584e+07	4.48516e+06	4.13673e+06	4.866e+06	1.9651e+07	1.94936e+07	1.97386e+07	2.09067e+07	2.06646e+07	2.11304e+07	1.50487e+07	1.36657e+07	15380911	1.72499e+07	16664493	1.73783e+07	2.10428e+07
74000000	8.57589e+06	8183863	8.86583e+06	9.17927e+06	9.03105e+06	9.40198e+06	9.05149e+06	8.10549e+06	1.2704e+07	1.21311e+07	1.19744e+07	1.22296e+07	1.02986e+07	1.02399e+07	1.03744e+07	1.01152e+07	9.14233e+06	1.04803e+07	1.02348e+07	1.01659e+07	1.05438e+07	1.35121e+07	1.31784e+07	1.39224e+07	5.27055e+06	4929482	5.62349e+06	1.15277e+07	1.102e+07	1.175e+07	11275989	1.12182e+07	1.14874e+07	4.49011e+06	4.14039e+06	4.87305e+06	1.97322e+07	1.95735e+07	1.98218e+07	21002408	2.07546e+07	2.12306e+07	1.50972e+07	1.37023e+07	15434430	1.73128e+07	1.6721e+07	1.74434e+07	21137612
75000000	8.59083e+06	8.19609e+06	8.88399e+06	9.1957e+06	9.04663e+06	9.41925e+06	9.07084e+06	8.11826e+06	1.27814e+07	1.21593e+07	1.19979e+07	1.22599e+07	1.03177e+07	1.02587e+07	1.03944e+07	1.01364e+07	9157005	1.05039e+07	10255200	10185637	1.05712e+07	1.35517e+07	1.32134e+07	13970432	5.27663e+06	4.9337e+06	5.63127e+06	1.15549e+07	1.10393e+07	1.17811e+07	1.1302e+07	11243613	1.15157e+07	4.49494e+06	4.14396e+06	4879934	19811866	1.96519e+07	1.99036e+07	2.10966e+07	2.0843e+07	2.13293e+07	1.51448e+07	1.37381e+07	1.54869e+07	1.73745e+07	1.67766e+07	1.75073e+07	2.12306e+07
76000000	8.60546e+06	8.20803e+06	8.90176e+06	9.21176e+06	9.06185e+06	9.43614e+06	9.08978e+06	8.13074e+06	1.28582e+07	1.21868e+07	1.20175e+07	12289616	1.03362e+07	1.02771e+07	1.04139e+07	1.01571e+07	9.17134e+06	1.0527e+07	10275147	1.02049e+07	1.05982e+07	1.35905e+07	1.32477e+07	1.40177e+07	5.28257e+06	4.93782e+06	5.63888e+06	1.15815e+07	1.10582e+07	1.18117e+07	1.13274e+07	1.12685e+07	1.15443e+07	4.49966e+06	4.14744e+06	4.88666e+06	1.98902e+07	1.97289e+07	19983937	2.11892e+07	2.09299e+07	2.14263e+07	1.51914e+07	1.37733e+07	1.55384e+07	1.7435e+07	1.68313e+07	1.75701e+07	2.13217e+07
77000000	8619759	8.21969e+06	8.91918e+06	9.22745e+06	9.07673e+06	9.45265e+06	9.10832e+06	8.14293e+06	1.29344e+07	1.22137e+07	1.20364e+07	1.23187e+07	1.03544e+07	1.0295e+07	1.04331e+07	1.01775e+07	9.18533e+06	1.05496e+07	1.02947e+07	1.02238e+07	1.06247e+07	1.36286e+07	1.32813e+07	1.40642e+07	5.28837e+06	4.94183e+06	5.6463e+06	1.16075e+07	1.10766e+07	1.18416e+07	1.13523e+07	1.12928e+07	11572679	4.50426e+06	4.15083e+06	4.89324e+06	1.99671e+07	1.98045e+07	20062941	2.12804e+07	2.10153e+07	2.15219e+07	1.52371e+07	1.38078e+07	1.5589e+07	1.74949e+07	1.6885e+07	1.76317e+07	2.14113e+07
78000000	8.63375e+06	8.23107e+06	8.93623e+06	9.2428e+06	9.09128e+06	9.46879e+06	9.12646e+06	8154848	1.301e+07	1.22401e+07	1.20545e+07	1.23473e+07	1.03722e+07	1.03126e+07	1.04518e+07	1.01973e+07	9.19901e+06	1.05717e+07	1.03137e+07	1.02422e+07	1.06508e+07	1.36659e+07	1.33142e+07	1.411e+07	5.29404e+06	4.94574e+06	5.65357e+06	1.16331e+07	1.10946e+07	1.1871e+07	1.13767e+07	1.13166e+07	1.16006e+07	4.50876e+06	4.15415e+06	4.89968e+06	2.00427e+07	1.98788e+07	2.01406e+07	2.13701e+07	21099200	2.16163e+07	1.52819e+07	1.38416e+07	1.56386e+07	1.75536e+07	1.69379e+07	1.76922e+07	2.14994e+07
79000000	8.64743e+06	8.2422e+06	8.95295e+06	9.25781e+06	9.1055e+06	9484583	9.14424e+06	8.1665e+06	1.30849e+07	1.2266e+07	1.20732e+07	1.23752e+07	1.03896e+07	1.03298e+07	1.04701e+07	1.02168e+07	9.21238e+06	1.05934e+07	1.03324e+07	1.02603e+07	1.06764e+07	1.37024e+07	1.33465e+07	1.4155e+07	5.29961e+06	4.94955e+06	5.66066e+06	1.16581e+07	11112207	1.18999e+07	1.14006e+07	1.13399e+07	1.16279e+07	4.51316e+06	4.15738e+06	4905970	2.0117e+07	1.99518e+07	2.0217e+07	2.14579e+07	2.11817e+07	2.17097e+07	1.53258e+07	1.38748e+07	1.56873e+07	1.76113e+07	1.69898e+07	17751687	2.15873e+07
80000000	8.66083e+06	8.25308e+06	8.96933e+06	9.2725e+06	9.11941e+06	9.50003e+06	9.16165e+06	8.17789e+06	1.31593e+07	1.22913e+07	1.20937e+07	1.24027e+07	1.04066e+07	1.03466e+07	1.0488e+07	1.02358e+07	9.22545e+06	1.06146e+07	1.03507e+07	1.02779e+07	1.07017e+07	1.3738e+07	1.33781e+07	1.41994e+07	5305066	4.95327e+06	5.6676e+06	1.16826e+07	1.11294e+07	1.19282e+07	1.1424e+07	1.13627e+07	1.16548e+07	4.51745e+06	4.16055e+06	4.91213e+06	2.019e+07	2.00234e+07	2.02921e+07	2.15436e+07	2.12623e+07	2.18021e+07	1.53689e+07	1.39073e+07	1.57351e+07	1.7668e+07	1.7041e+07	17810120	2.16738e+07
81000000	8.67393e+06	8.26371e+06	8.98539e+06	9.28687e+06	9.13302e+06	9.51515e+06	9.1787e+06	8189030	1.32331e+07	1.23162e+07	1.21137e+07	1.24296e+07	1.04232e+07	1.0363e+07	1.05055e+07	1.02544e+07	9.23822e+06	1.06354e+07	1.03686e+07	1.02952e+07	1.07266e+07	1.37731e+07	1.34091e+07	1.42431e+07	5.3104e+06	4.95691e+06	5674391	1.17066e+07	1.11462e+07	1.19561e+07	1.14469e+07	1.13851e+07	1.16811e+07	4.52165e+06	4.16363e+06	4.91815e+06	2.02618e+07	20093856	2.0366e+07	2.16276e+07	2.13417e+07	2.18931e+07	15411164	1.39393e+07	1.57821e+07	1.7723e+07	1.70913e+07	1.78675e+07	2.17584e+07
82000000	8.68676e+06	8.2741e+06	9.00114e+06	9300932	9.14634e+06	9.52996e+06	9.19541e+06	8.19993e+06	13306381	1.23406e+07	1.21332e+07	1.2456e+07	1.04395e+07	1.03791e+07	10522681	1.02727e+07	9.25072e+06	1.06557e+07	10386166	1.03121e+07	1.07511e+07	1.38074e+07	1.34395e+07	1.42861e+07	5.31562e+06	4.96046e+06	5.68103e+06	1.17301e+07	1.11627e+07	1.19834e+07	1.14694e+07	1.1407e+07	1.1707e+07	4.52576e+06	4.16665e+06	4.92405e+06	20332411	2.01631e+07	2.04387e+07	2.17105e+07	21419742	2.19828e+07	1.54527e+07	1.39706e+07	1.58282e+07	17777063	1.71407e+07	1.7924e+07	21841603
83000000	8.69933e+06	8.28427e+06	9.01658e+06	9.3147e+06	9.15938e+06	9.54445e+06	9.2118e+06	8.2106e+06	1.33791e+07	1.23645e+07	1.21522e+07	1.24819e+07	1.04554e+07	1.03946e+07	1.05395e+07	1.02906e+07	9.26295e+06	1.06757e+07	1.04033e+07	1.03287e+07	1.07752e+07	1.38412e+07	1.34693e+07	1.43287e+07	5.32073e+06	4.96392e+06	5.68753e+06	1.17532e+07	11177972	1.20103e+07	1.14914e+07	1.14285e+07	1.17324e+07	4.52978e+06	4.1696e+06	4.92983e+06	2.04019e+07	2.02311e+07	2.05103e+07	2.17927e+07	2.14965e+07	2.20712e+07	15493379	1.40014e+07	1.58736e+07	1.78301e+07	17189410	1.79794e+07	21923458
84000000	8.71163e+06	8.29422e+06	9.03173e+06	9328182	9.17214e+06	9.55864e+06	9.22785e+06	8.22104e+06	1.34512e+07	1.23879e+07	1.21708e+07	1.25074e+07	1.0471e+07	1.04098e+07	1.05559e+07	10308084	9.27491e+06	1.06952e+07	10420174	1.03449e+07	1.0799e+07	1.38743e+07	1.34985e+07	1.43707e+07	5.32572e+06	4.96731e+06	5.69389e+06	1.17758e+07	1.11928e+07	1.20366e+07	1.1513e+07	1.14495e+07	1.17574e+07	4.53371e+06	4.17249e+06	4.93548e+06	2.04702e+07	2.0298e+07	2.05807e+07	2.18736e+07	2.15721e+07	2.21583e+07	1.55334e+07	14031636	1.59181e+07	1.78823e+07	1.72373e+07	1.8034e+07	2.20036e+07
85000000	8.72369e+06	8303955	9.04659e+06	9341386	9.18464e+06	9.57254e+06	9.2436e+06	8.23126e+06	1.35228e+07	1.24109e+07	1.21889e+07	1.25324e+07	1.04863e+07	1.04247e+07	1.0572e+07	1.03252e+07	9.28662e+06	1.07144e+07	1.04367e+07	1.03608e+07	1.08223e+07	1.39068e+07	1.35272e+07	1.44121e+07	5.33061e+06	4.97062e+06	5.70012e+06	1.1798e+07	1.12072e+07	1.20625e+07	1.15342e+07	1.14702e+07	1.17819e+07	4.53755e+06	4.17531e+06	4.94102e+06	2.05374e+07	2.03638e+07	20649964	2.19533e+07	2.16464e+07	2.22443e+07	1.55726e+07	1.40613e+07	1.59618e+07	1.79335e+07	1.72844e+07	1.80876e+07	22082409
86000000	8.7355e+06	8313483	9.06117e+06	9.35432e+06	9.19688e+06	9.58616e+06	9.25904e+06	8.24127e+06	1.35939e+07	1.24334e+07	1.22066e+07	1.25569e+07	1.05012e+07	1.04392e+07	1.05878e+07	1.0342e+07	9.29673e+06	10733189	1.04528e+07	1.03764e+07	1.08406e+07	1.39388e+07	1.35554e+07	1.44529e+07	5.33539e+06	4.97385e+06	5706212	1.18198e+07	1.12213e+07	12088010	1.1555e+07	1.14904e+07	1.1806e+07	4.54131e+06	4.17807e+06	4.94645e+06	20603458	2.04284e+07	2.07182e+07	2.20317e+07	21719548	2.2329e+07	1.56111e+07	1.40905e+07	1.60048e+07	1.79839e+07	1.73308e+07	1.81403e+07	2.21601e+07
87000000	8747077	8.32281e+06	9.07548e+06	9.36699e+06	9.20887e+06	9.5995e+06	9.27419e+06	8.25107e+06	1.36644e+07	1.24556e+07	12223564	1.2581e+07	1.05159e+07	1.04534e+07	1.06033e+07	1.03584e+07	9.30605e+06	1.07516e+07	1.04687e+07	10391698	1.08585e+07	1.39703e+07	1.3583e+07	1.44931e+07	5.34007e+06	4977014	5712183	1.18412e+07	1.12352e+07	1.2113e+07	11575352	1.15103e+07	1.18296e+07	4.545e+06	4.18077e+06	4.95177e+06	2.06683e+07	2.04918e+07	2.07853e+07	2.2109e+07	2.17916e+07	2.24125e+07	1.5649e+07	1.41191e+07	1.60471e+07	1.80334e+07	1.73764e+07	18192217	2.22365e+07
88000000	8758424	8.33194e+06	9.08953e+06	9.37941e+06	9.22062e+06	9.61258e+06	9.28905e+06	8.26067e+06	1.37345e+07	1.24773e+07	1.22401e+07	1.26047e+07	1.05303e+07	1.0467e+07	1.06185e+07	1.03746e+07	9.31514e+06	1.07697e+07	1.04842e+07	1.04067e+07	1.08762e+07	1.40012e+07	1.36102e+07	1.45328e+07	5.34466e+06	4.98011e+06	5.71803e+06	1.18621e+07	1.12487e+07	1.21377e+07	1.15953e+07	1.15298e+07	1.18529e+07	4.5486e+06	4.18341e+06	4.95698e+06	2.07321e+07	2.05541e+07	2.08514e+07	2.21852e+07	2.18624e+07	2.24949e+07	1.56862e+07	14147245	1.60887e+07	1.80822e+07	1.74213e+07	1.82432e+07	22311824
89000000	8.76955e+06	8.34089e+06	9.10333e+06	9.39159e+06	9.23214e+06	9.62541e+06	9.30363e+06	8.27008e+06	1.3804e+07	1.24986e+07	1.22563e+07	1.26279e+07	1.05445e+07	10480209	1.06333e+07	1.03904e+07	9.32403e+06	1.07875e+07	1.04995e+07	1.04214e+07	1.08935e+07	1.40316e+07	1.36368e+07	1.4572e+07	5.34915e+06	4.98313e+06	5.72376e+06	1.18827e+07	1.1262e+07	12161861	1.1615e+07	1.15489e+07	1.18758e+07	4.55214e+06	4.186e+06	4962093	2.0795e+07	2.06155e+07	2.09166e+07	2.22602e+07	2.19322e+07	2.25764e+07	1.57227e+07	1.41749e+07	1.61295e+07	1.81303e+07	1.74655e+07	1.82934e+07	2.2386e+07
90000000	8.78046e+06	8349655	9116872	9.40353e+06	9.24343e+06	9.63798e+06	9.31794e+06	8.27931e+06	1.3873e+07	1.25195e+07	1.22721e+07	1.26508e+07	1.05583e+07	1.04931e+07	1.06479e+07	1.04059e+07	9332716	1.0805e+07	1.05144e+07	1.04358e+07	1.09106e+07	1.40615e+07	1.3663e+07	1.46106e+07	5.35355e+06	4.98609e+06	5.72938e+06	1.19029e+07	1.1275e+07	12185662	1.16342e+07	1.15677e+07	11898298	4.5556e+06	4.18853e+06	4.9671e+06	2.08568e+07	2.06759e+07	20980681	2.23342e+07	2.20009e+07	2.26568e+07	1.57586e+07	1.42021e+07	1.61697e+07	1.81777e+07	1.7509e+07	1.83428e+07	2.24591e+07
91000000	8.79116e+06	8.35824e+06	9130176	9.41523e+06	9.2545e+06	9.65031e+06	9.33199e+06	8.28835e+06	1.39416e+07	1.254e+07	1.22875e+07	1.26732e+07	1.05719e+07	1.05058e+07	1.06621e+07	1.04211e+07	9.34121e+06	1.08221e+07	1.05291e+07	1.04499e+07	1.09274e+07	1.40909e+07	1.36887e+07	1.46487e+07	5.35786e+06	4.98899e+06	5.73489e+06	1.19228e+07	11287720	1.22091e+07	1.16531e+07	1.15861e+07	1.192e+07	4.55899e+06	4.19101e+06	4.97202e+06	2.09177e+07	2.07353e+07	2.10438e+07	2.2407e+07	2.20686e+07	2.27361e+07	1.57939e+07	14228762	1.62092e+07	1.82242e+07	1.75519e+07	1.83915e+07	2.25311e+07
92000000	8.80165e+06	8.36666e+06	9.14324e+06	9.42671e+06	9.26535e+06	9.66241e+06	9.34578e+06	8.29721e+06	1.40096e+07	1.25601e+07	1.23026e+07	1.26953e+07	1.05853e+07	1.05182e+07	1.06753e+07	1.0436e+07	9.34951e+06	1.08389e+07	1.05435e+07	1.04637e+07	1.09439e+07	1.41198e+07	1.37139e+07	1.46862e+07	5.36208e+06	4.99182e+06	5.74028e+06	1.19423e+07	1.13002e+07	1.22321e+07	1.16717e+07	1.16042e+07	1.19412e+07	4.56231e+06	4.19344e+06	4.97684e+06	2.09776e+07	2.07938e+07	2.11061e+07	2.24788e+07	2.21353e+07	2.28144e+07	1.58286e+07	1.4255e+07	16248105	1.827e+07	1.7594e+07	1.84393e+07	2.2602e+07
93000000	8.81195e+06	8.37491e+06	9.15608e+06	9.43797e+06	9.276e+06	9.67427e+06	9.35933e+06	8.3059e+06	1.40772e+07	1.25799e+07	1.23174e+07	1.2717e+07	1.05983e+07	1.05304e+07	1.06883e+07	1.04507e+07	9.35763e+06	1.08554e+07	10557611	1.04773e+07	1.09602e+07	14148176	13738703	1.47233e+07	5.36622e+06	4.9946e+06	5.74558e+06	1.19614e+07	1.13124e+07	1.22548e+07	1.16899e+07	1.1622e+07	1.1962e+07	4.56557e+06	4.19582e+06	4981568	21036653	2.08514e+07	2.11674e+07	22549632	2.22009e+07	2.28916e+07	1.58627e+07	1.42797e+07	1.62864e+07	1.83151e+07	1.76356e+07	1.84864e+07	2.26719e+07
94000000	8.82206e+06	8382996	9168702	9.44902e+06	9286439	9.68591e+06	9.37263e+06	8.31443e+06	1.41443e+07	1.25994e+07	1.23319e+07	1.27384e+07	1.06112e+07	1.05423e+07	1.07011e+07	10465056	9365566	1.08716e+07	1.05715e+07	10490666	1.09764e+07	1.41761e+07	1.37631e+07	14759957	5.37028e+06	4997318	5750770	1.19802e+07	1.13244e+07	1.22771e+07	1.17078e+07	1.16394e+07	1.19825e+07	4.56876e+06	4.19815e+06	4.98621e+06	2.10948e+07	2.09081e+07	2.12278e+07	2.26197e+07	2.22656e+07	2.29679e+07	1.58963e+07	1.43011e+07	1.6324e+07	1.83594e+07	1.76765e+07	1.85328e+07	2.27409e+07
95000000	8.83198e+06	8.39093e+06	9.1811e+06	9.45986e+06	9.29669e+06	9.69734e+06	9.38569e+06	8.32279e+06	1.4211e+07	1.26184e+07	1.23461e+07	1.27594e+07	1.06238e+07	10553980	1.07136e+07	1.04792e+07	9.37333e+06	10887497	1.05852e+07	1.05038e+07	10992479	1.42036e+07	1.3787e+07	1.47961e+07	5.37426e+06	4.99998e+06	5.75586e+06	1.19987e+07	1.13361e+07	1.2299e+07	1.17254e+07	1.16565e+07	1.20027e+07	4.57189e+06	4.20044e+06	4.99076e+06	2.11521e+07	2.09633e+07	21287336	2.26889e+07	2.23293e+07	2.30438e+07	1.59293e+07	1.43221e+07	1.6361e+07	1.84031e+07	1.77167e+07	1.85784e+07	22808774
96000000	8.84172e+06	8.39871e+06	9.19329e+06	9.4705e+06	9.30674e+06	9.70856e+06	9.39853e+06	8.331e+06	1.42772e+07	1.26372e+07	1.236e+07	1.278e+07	1.06361e+07	1.05654e+07	1.07259e+07	1.0493e+07	9380937	1.09031e+07	10598630	1.05166e+07	1.10084e+07	1.42306e+07	1.38106e+07	1.48318e+07	5.37817e+06	5.00259e+06	5.76086e+06	1.20168e+07	1.13477e+07	1.23206e+07	1.17427e+07	1.16733e+07	1.20225e+07	4.57496e+06	4.20268e+06	4.99523e+06	2.12085e+07	2.10171e+07	2.1346e+07	2.27572e+07	2.23921e+07	2.31194e+07	1.59618e+07	1.43427e+07	1.63975e+07	1.8446e+07	1.77564e+07	1.86234e+07	2.28757e+07
97000000	8851280	8.40634e+06	9205274	9.48095e+06	9.31661e+06	9.71957e+06	9.41114e+06	8.33905e+06	1.43429e+07	1.26556e+07	12373569	1.28003e+07	1.06483e+07	1.05767e+07	1.0738e+07	1.05067e+07	9.38838e+06	1.09185e+07	1.06118e+07	1.05292e+07	1.1024e+07	1.42571e+07	1.38337e+07	1.4867e+07	5.382e+06	5005147	5765764	1.20347e+07	1.1359e+07	1.23419e+07	1.17597e+07	1.16899e+07	1.2042e+07	4.57798e+06	4.20488e+06	4999623	2.1264e+07	2.10702e+07	2.14039e+07	2.28245e+07	2.2454e+07	2.31941e+07	1.59937e+07	1.43629e+07	1.64334e+07	1.84883e+07	17795474	1.86677e+07	2.29418e+07
98000000	8.86067e+06	8.41382e+06	9.21706e+06	9.49121e+06	9.3263e+06	9.73038e+06	9.42353e+06	8.34695e+06	1.44082e+07	12673625	1.23869e+07	1.28203e+07	1.06602e+07	1.05877e+07	1.07499e+07	1.052e+07	9395662	1.09336e+07	1.06248e+07	1.05416e+07	1.10394e+07	1.42833e+07	13856510	1.49018e+07	5.38576e+06	5007653	5.77058e+06	12052186	1.13701e+07	1.23628e+07	1.17764e+07	1.17061e+07	1.20612e+07	4.58093e+06	4.20703e+06	5003933	2.13186e+07	2.11225e+07	2.14609e+07	2.28909e+07	2.25155e+07	2.32679e+07	1.60251e+07	1.43827e+07	1.64687e+07	1.853e+07	1.7834e+07	1.87113e+07	23006846
99000000	8.86989e+06	8.42117e+06	9228643	9.50128e+06	9.33582e+06	9.741e+06	9435715	8.35471e+06	1.44731e+07	1.26914e+07	1.24e+07	1.284e+07	1.06719e+07	1.05985e+07	1.07615e+07	1.05332e+07	9.40279e+06	1.09484e+07	1.06375e+07	1.05538e+07	1.10546e+07	1.4309e+07	1.38794e+07	1.49362e+07	5.38945e+06	5.01011e+06	5.7753e+06	1.20694e+07	1.1381e+07	1.23834e+07	1.17928e+07	1.1722e+07	1.20801e+07	4.58383e+06	4.20915e+06	5.00817e+06	2.13725e+07	21173947	2.15171e+07	2.29564e+07	2.25767e+07	2.33408e+07	1.6056e+07	1.44022e+07	1.65035e+07	1.8571e+07	1.78719e+07	1.87543e+07	2.3071e+07
100000000	8.87895e+06	8.42838e+06	9.24004e+06	9.51117e+06	9.34516e+06	9.75144e+06	9.44769e+06	8.36233e+06	1.45375e+07	1.27088e+07	1.24129e+07	1.28593e+07	1.06834e+07	10609104	1.0773e+07	1.05461e+07	9.40978e+06	1.0963e+07	1.065e+07	1.05658e+07	1.10696e+07	1.43343e+07	13901889	1.49701e+07	5.39307e+06	5.01252e+06	5.77994e+06	1.20864e+07	1.13916e+07	12403728	11808904	1.17377e+07	1.20988e+07	4.58668e+06	4.21122e+06	5.01232e+06	2.14255e+07	21224679	2.15725e+07	2.30211e+07	2.2637e+07	2.34129e+07	16086410	14421249	1.65377e+07	18611382	17909230	1.87966e+07	2.31343e+07
101000000	8.88785e+06	8.43546e+06	9.25125e+06	9.52089e+06	9.35434e+06	9.76168e+06	9.45946e+06	8.36981e+06	1.46016e+07	1.2726e+07	1.24255e+07	1.28784e+07	1.06947e+07	1.06195e+07	1.07842e+07	1.05588e+07	9.41662e+06	1.09773e+07	1.06623e+07	1.05775e+07	1.10843e+07	1.43592e+07	1.3924e+07	1.50037e+07	5.39662e+06	5.01488e+06	5.7845e+06	1.2103e+07	1.14021e+07	1.24237e+07	1.18248e+07	1.17531e+07	1.21171e+07	4.58947e+06	4.21326e+06	5.01641e+06	2.14778e+07	2.12747e+07	2.1627e+07	2.30848e+07	2.26966e+07	2.34841e+07	16116339	1.444e+07	1.65715e+07	1.86512e+07	1.7946e+07	1.88383e+07	2.31968e+07
102000000	8.8966e+06	8.44241e+06	9262278	9.53044e+06	9.36335e+06	9.77175e+06	9.47104e+06	8.37716e+06	1.46651e+07	1.27429e+07	1.24379e+07	1.28972e+07	1.07058e+07	1.06297e+07	1.07953e+07	1.05712e+07	9.42332e+06	1.09914e+07	1.06744e+07	1.05891e+07	1.10989e+07	1.43838e+07	1.39458e+07	1.50368e+07	5.40011e+06	5.0172e+06	5.78897e+06	1.21194e+07	1.14124e+07	1.24434e+07	1.18404e+07	1.17683e+07	1.21352e+07	4.59222e+06	4.21526e+06	5.02042e+06	2.15294e+07	2.13239e+07	2.16808e+07	2.31477e+07	2.27553e+07	2.35544e+07	1.61458e+07	1.44584e+07	1.66047e+07	1.86903e+07	1.79823e+07	1.88794e+07	2.32584e+07
103000000	8.9052e+06	8.44924e+06	9.27313e+06	9.53982e+06	9.37221e+06	9.78165e+06	9.48243e+06	8.38438e+06	1.47283e+07	1.27595e+07	1.245e+07	1.29156e+07	1.07167e+07	1.06398e+07	1.08061e+07	1.05835e+07	9.42989e+06	1.10052e+07	10686234	1.06004e+07	1.11133e+07	1.44079e+07	1.39672e+07	1.50696e+07	5.40354e+06	5.01947e+06	5793367	1.21356e+07	1.14225e+07	1.24628e+07	11855698	1.17832e+07	1.21529e+07	4.59491e+06	4.21722e+06	5.02437e+06	2.15802e+07	2.13725e+07	2.17338e+07	2.32098e+07	2.28132e+07	2.3624e+07	1.61748e+07	1.44763e+07	16637406	1.8729e+07	1.80181e+07	18919960	2.33191e+07
104000000	8.91365e+06	8.45594e+06	9283809	9.54904e+06	9.38092e+06	9.79137e+06	9.49362e+06	8.39148e+06	1.47911e+07	1.27758e+07	1.2462e+07	1.29338e+07	1.07274e+07	1.06496e+07	1.08168e+07	1.05956e+07	9436330	1.10188e+07	1.06979e+07	1.06116e+07	1.11274e+07	1.44317e+07	1.39883e+07	1.51019e+07	5.4069e+06	5.0217e+06	5.79769e+06	1.21514e+07	1.14325e+07	1.2482e+07	1.18708e+07	1.17979e+07	1.21705e+07	4597560	4219144	5.02824e+06	2.16303e+07	2.14204e+07	2.17861e+07	2.32711e+07	22870293	2.36928e+07	1.62033e+07	1.44936e+07	1.66696e+07	1.8767e+07	1.80533e+07	1.89599e+07	2.33791e+07
105000000	8921952	8.46253e+06	9.29432e+06	9558103	9.38947e+06	9.80093e+06	9504640	8.39845e+06	1.48535e+07	1.27919e+07	1.24737e+07	1.29518e+07	1.07379e+07	1.06593e+07	1.08273e+07	1.06074e+07	9.44264e+06	1.10322e+07	1.07094e+07	1.06226e+07	1.11414e+07	1.44551e+07	1.40091e+07	1.51339e+07	5.41021e+06	5.02389e+06	5.80193e+06	1.21671e+07	1.14423e+07	1.25008e+07	1.18857e+07	1.18123e+07	1.21877e+07	4.60016e+06	4.22103e+06	5.03205e+06	2.16798e+07	2.14673e+07	2.18377e+07	2.33312e+07	2.29266e+07	2.37608e+07	1.62315e+07	14510604	1.67014e+07	1.88045e+07	1.8088e+07	1.89993e+07	2.34383e+07
106000000	8.93012e+06	8.469e+06	9.30467e+06	9.56701e+06	9.39788e+06	9.81033e+06	9.51548e+06	8.4053e+06	1.49154e+07	1.28077e+07	1.24853e+07	1.29694e+07	1.07482e+07	10668753	1.08376e+07	1.06191e+07	9.44883e+06	1.10454e+07	1.07207e+07	1.06334e+07	1.11552e+07	1.44782e+07	1.40295e+07	1.51655e+07	5.41346e+06	5.02604e+06	5.8061e+06	1.21824e+07	1.14518e+07	1.25194e+07	11900295	1.18265e+07	1.22047e+07	4.60271e+06	4.22289e+06	5.0358e+06	21728498	2.15134e+07	2.18886e+07	2.33905e+07	22982227	2.38281e+07	1.62591e+07	1.45273e+07	1.67327e+07	1.88414e+07	1.81223e+07	1.90381e+07	2.34966e+07
107000000	8.93815e+06	8.47536e+06	9.31485e+06	9.57577e+06	9406144	9.81957e+06	9526143	8.41203e+06	1.4977e+07	1.28232e+07	1.24967e+07	1.29868e+07	1.07583e+07	1.06781e+07	1.08477e+07	10630526	9.45489e+06	11058349	1.07318e+07	1.0644e+07	1.11688e+07	1.45009e+07	1.40496e+07	1.51968e+07	5.41665e+06	5.02815e+06	5.8102e+06	1.21975e+07	1.14613e+07	1.25377e+07	1.19147e+07	11840458	1.22215e+07	4.60522e+06	4.22472e+06	5.03948e+06	2.17766e+07	2.15589e+07	2.19388e+07	2.3449e+07	2.30371e+07	2.38945e+07	1.62864e+07	1.45437e+07	1.67636e+07	1.88778e+07	1.8156e+07	19076349	2.35542e+07
108000000	8.94605e+06	8.48161e+06	9.32488e+06	9.58439e+06	9.41427e+06	9.82866e+06	9.53664e+06	8.41865e+06	1.50382e+07	1.28385e+07	1.25079e+07	1.30039e+07	1.07682e+07	10687235	1.08577e+07	1.06418e+07	9.46084e+06	1.10711e+07	10742709	1.06544e+07	1.11822e+07	1.45233e+07	1.40694e+07	1.5229e+07	5.41979e+06	5.03022e+06	5.81423e+06	1.22124e+07	1.14705e+07	1.25558e+07	1.19289e+07	1.18542e+07	1.2238e+07	4.60769e+06	4.22651e+06	5.04311e+06	2.1824e+07	2.16037e+07	2.19884e+07	23506743	2.30912e+07	23960308	1.63133e+07	14559803	1.6794e+07	1.89137e+07	1.81893e+07	1.91141e+07	2.36111e+07
109000000	8.95382e+06	8.48775e+06	9.33476e+06	9.59286e+06	9.42226e+06	9.8376e+06	9.54697e+06	8425156	1.5099e+07	1.28536e+07	12518879	1.30208e+07	1.0778e+07	1.06962e+07	10867509	1.06529e+07	9.46668e+06	1.10837e+07	1.07535e+07	1.06647e+07	1.11955e+07	1.45453e+07	1.40889e+07	1.52613e+07	5.42287e+06	5.03226e+06	5.81819e+06	1.22271e+07	1.14797e+07	1.25735e+07	1.19428e+07	1.18677e+07	1.22543e+07	4.61012e+06	4.22827e+06	5.04667e+06	2.18707e+07	21647906	2.20373e+07	2.35638e+07	2.31446e+07	2.40253e+07	1.63397e+07	1.45756e+07	1.68239e+07	1.89491e+07	1.82221e+07	1.91513e+07	2.36672e+07
110000000	8961465	8.49379e+06	9.34448e+06	9.60119e+06	9.43013e+06	9846396	9.55714e+06	8431581	15159396	12868443	1.25297e+07	1.30374e+07	1.07876e+07	1.07051e+07	1.08772e+07	1.06638e+07	9.4724e+06	1.1096e+07	1.0764e+07	1.06748e+07	1.12086e+07	1.45671e+07	1.41081e+07	1.52933e+07	5.4259e+06	5.03425e+06	5.82209e+06	1.22415e+07	1.14886e+07	1.25911e+07	1.19566e+07	1.1881e+07	1.22704e+07	4.6125e+06	4.23e+06	5.05018e+06	2.19169e+07	2.16915e+07	2.20856e+07	2.36201e+07	2.31973e+07	2.40897e+07	1.63658e+07	1.45912e+07	1.68535e+07	1.8984e+07	1.82545e+07	1.9188e+07	2.37226e+07
111000000	8.96899e+06	8.49972e+06	9.35406e+06	9.60939e+06	9.43786e+06	9.85505e+06	9.56715e+06	8.43793e+06	1.52194e+07	12883046	1.25404e+07	1.30538e+07	1.0797e+07	1.07138e+07	1.08867e+07	1.06746e+07	9.47802e+06	1.11082e+07	1.07744e+07	1.06847e+07	1.12215e+07	1.45885e+07	1.41271e+07	1.5325e+07	5.42888e+06	5.03622e+06	5.82592e+06	1.22557e+07	1.14974e+07	1.26084e+07	1.19701e+07	11894142	1.22862e+07	4.61484e+06	4.2317e+06	5.05362e+06	2.19624e+07	2.17345e+07	2.21332e+07	2.36757e+07	2.32494e+07	2.41533e+07	1.63915e+07	14606475	1.68826e+07	1.90184e+07	1.82864e+07	1.92242e+07	2.37773e+07
112000000	8.97639e+06	8.50556e+06	9.3635e+06	9.61745e+06	9.44546e+06	9.86356e+06	9.577e+06	8.44418e+06	15279123	12897425	1.25509e+07	1.307e+07	1.08063e+07	1.07223e+07	1.0896e+07	1.06851e+07	9483536	1.11201e+07	1.07847e+07	1.06945e+07	1.12343e+07	1.46096e+07	1.41457e+07	1.53563e+07	5.43181e+06	5.03815e+06	5.82969e+06	1.22697e+07	1.15061e+07	1.26255e+07	11983429	1.1907e+07	12301788	4.61715e+06	4.23337e+06	5.05702e+06	2.20073e+07	2.17769e+07	2.21803e+07	2.37306e+07	23300727	2.42163e+07	1.64168e+07	1.46215e+07	1.69114e+07	1.90523e+07	18317835	1.92599e+07	2.38313e+07
113000000	8.98369e+06	8.5113e+06	9.37279e+06	9.62539e+06	9.45295e+06	9.87194e+06	9.58671e+06	8.45033e+06	1.53432e+07	1.29116e+07	12561298	1.30859e+07	1.08154e+07	1.07307e+07	1.09052e+07	1.06955e+07	9.48895e+06	1.11319e+07	1.07948e+07	1.07041e+07	11246885	1.46304e+07	1.41641e+07	1.53874e+07	5.43469e+06	5.04004e+06	5.83344e+06	1.22835e+07	1.15146e+07	1.26423e+07	1.19965e+07	1.19198e+07	1.23172e+07	4619414	4.23502e+06	5.06036e+06	2.20516e+07	21818631	2.22267e+07	2.37848e+07	2.33514e+07	2.42786e+07	1.64417e+07	1.46363e+07	1.69397e+07	1.90857e+07	18348880	1.92952e+07	2.38846e+07
114000000	8.99093e+06	8.51695e+06	9.38196e+06	9.6332e+06	9.46031e+06	9.88018e+06	9.59627e+06	8.45638e+06	1.54075e+07	1.29255e+07	1.25715e+07	1.31017e+07	1.08244e+07	1.0739e+07	1.09142e+07	1.07058e+07	9.49426e+06	1.11435e+07	1.08048e+07	1.07136e+07	1.12593e+07	1.46509e+07	14182159	1.54182e+07	5.43753e+06	5.04191e+06	5.8374e+06	1.22971e+07	1.1523e+07	1.26589e+07	1.20095e+07	1.19323e+07	1.23324e+07	4.62164e+06	4.23663e+06	5.06365e+06	2.20954e+07	2.18598e+07	2.22725e+07	2.38383e+07	23401496	2.43402e+07	1.64663e+07	1.46508e+07	1.69676e+07	1.91185e+07	1.83795e+07	1.93299e+07	2.39373e+07
115000000	8.99805e+06	8.5225e+06	9.39098e+06	9.64089e+06	9.46756e+06	9.8883e+06	9.60568e+06	8.46233e+06	1.54714e+07	1.29393e+07	1.25811e+07	1.31172e+07	1.08332e+07	1.07471e+07	1.09231e+07	1.07159e+07	9.49948e+06	1.11549e+07	1.08145e+07	1.07229e+07	1.12716e+07	1.46711e+07	1.42e+07	1.54487e+07	5.44032e+06	5.04374e+06	5.8413e+06	1.23104e+07	1.15313e+07	1.26753e+07	1.20222e+07	1.19446e+07	1.23473e+07	4.62384e+06	4.23822e+06	5.06688e+06	2.21386e+07	2.19003e+07	2.23178e+07	2.38912e+07	2.34509e+07	2.44012e+07	1.64905e+07	1.46651e+07	16995167	1.91508e+07	18409717	1.93643e+07	2.39893e+07
116000000	9.00507e+06	8.52797e+06	9.39988e+06	9.64845e+06	9.4747e+06	9.89629e+06	9.61496e+06	8.46819e+06	1.5535e+07	12952802	1.25901e+07	1.31324e+07	1.08419e+07	1.07551e+07	1.09319e+07	10725803	9.5046e+06	1.11662e+07	10824199	1.07321e+07	1.12838e+07	1.4691e+07	1.42176e+07	1.54789e+07	5443064	5.04554e+06	5.84514e+06	1.23236e+07	11539404	1.26914e+07	1.20347e+07	1.19567e+07	1.23621e+07	4.62599e+06	4.23978e+06	5.07007e+06	2.21812e+07	2.19404e+07	2.23625e+07	2.39435e+07	23499737	2.44615e+07	16514419	1.46791e+07	1.70223e+07	1.9183e+07	1.84395e+07	1.93981e+07	2.40407e+07
117000000	9.01198e+06	8.53334e+06	9.40865e+06	9.6559e+06	9.48172e+06	9.90416e+06	9.62409e+06	8.47395e+06	1.55983e+07	1.29661e+07	1.2599e+07	1.31475e+07	1.08505e+07	1.07629e+07	1.09406e+07	1.07356e+07	9.50963e+06	11177281	1.08337e+07	1.07412e+07	1.12958e+07	1.47107e+07	1.42349e+07	1.55088e+07	5.44576e+06	5.04731e+06	5.84892e+06	1.23364e+07	1.15474e+07	1.27074e+07	1.20471e+07	1.19687e+07	1.23767e+07	4.62812e+06	4241323	5.0732e+06	2.22232e+07	2.19799e+07	2.24067e+07	2.39951e+07	2.35479e+07	2.45212e+07	16537973	1.4693e+07	1.70492e+07	1.92148e+07	1.84689e+07	19431526	2.40914e+07
118000000	9.01879e+06	8.53864e+06	9.41729e+06	9.66324e+06	9488636	9.9119e+06	9.6331e+06	8.47963e+06	1.56612e+07	1.29793e+07	1.26078e+07	1.31624e+07	1.0859e+07	1.07706e+07	10949054	10745221	9.51457e+06	1.11882e+07	1.08431e+07	1.07501e+07	1.13077e+07	1.47301e+07	1.42519e+07	15538472	5.44842e+06	5.04905e+06	5.85264e+06	1.23491e+07	1.15553e+07	1.27231e+07	1.20593e+07	1.19805e+07	1.23911e+07	4.63021e+06	4.24284e+06	5.07629e+06	2.22648e+07	2.20189e+07	2.24503e+07	2.40461e+07	2.35955e+07	2.45803e+07	1.65612e+07	1.47066e+07	1.70756e+07	1.92462e+07	1.8498e+07	1.94645e+07	2.41415e+07
119000000	9.02549e+06	8.54385e+06	9.42581e+06	9.67046e+06	9.49544e+06	9.91953e+06	9641968	8.48522e+06	1.57239e+07	1.29922e+07	1.26164e+07	1.3177e+07	1.08673e+07	1.07782e+07	1.09574e+07	1.07547e+07	9.51942e+06	1.1199e+07	1.08523e+07	1.07588e+07	11319411	1.47492e+07	1.42688e+07	1.55679e+07	5.45104e+06	5.05076e+06	5.8563e+06	1.23617e+07	1.1563e+07	1.27387e+07	1.20713e+07	1.19921e+07	12405246	4.63226e+06	4.24433e+06	5.07933e+06	2.23058e+07	2.20574e+07	2.24934e+07	2.40965e+07	2.36426e+07	2.46389e+07	1.65841e+07	1.47199e+07	17101711	1.92772e+07	1.85266e+07	1.94971e+07	2.4191e+07
120000000	9.03209e+06	8.54897e+06	9.43421e+06	9.67758e+06	9.50215e+06	9.92705e+06	9.65071e+06	8.49072e+06	1.57862e+07	1.3005e+07	1.26249e+07	1.31915e+07	1.08754e+07	1.07857e+07	1.09657e+07	1.07641e+07	9524194	1.12096e+07	1.08614e+07	1.07675e+07	11331008	1.4768e+07	1.42854e+07	1.55964e+07	5453614	5.05245e+06	5.85991e+06	1.2374e+07	1.15707e+07	1.2754e+07	1.20831e+07	1.20035e+07	1.24192e+07	4634289	4.24579e+06	5082328	22346271	2.20954e+07	2.2536e+07	2.41463e+07	2.3689e+07	2.46968e+07	1.66067e+07	14733088	1.71275e+07	1.93076e+07	18554871	1.95292e+07	2.42399e+07
121000000	9.0386e+06	8.55402e+06	9.4425e+06	9.68459e+06	9.50875e+06	9.93445e+06	9.65933e+06	8.49614e+06	15848218	1.30176e+07	1.26334e+07	13205795	1.08835e+07	1.07931e+07	1.09738e+07	10773275	9528881	1.122e+07	1.08703e+07	1.0776e+07	1.13425e+07	1.47866e+07	1.43017e+07	1.56232e+07	5.45615e+06	5.0541e+06	5.86347e+06	1.23861e+07	1.15782e+07	1.27691e+07	1.20947e+07	1.20148e+07	1.24331e+07	4.63628e+06	4.24723e+06	5085279	22386256	2.21328e+07	2.2578e+07	2.41956e+07	2.37349e+07	2.47541e+07	1.6629e+07	1.4746e+07	1.71529e+07	1.93376e+07	1.85828e+07	1.95609e+07	2.42883e+07
122000000	9.04501e+06	8558993	9.45066e+06	9.69149e+06	9.51526e+06	9.94174e+06	9.66782e+06	8.50148e+06	1.59099e+07	1.303e+07	1.26417e+07	1.32199e+07	10891437	10800294	1.09818e+07	1.07824e+07	9.53349e+06	1.12303e+07	1.08792e+07	1.07844e+07	1.13538e+07	1.4805e+07	1.43178e+07	15649625	5.45865e+06	5.05573e+06	5.86697e+06	1.23981e+07	11585593	1.27841e+07	12106236	1.20259e+07	1.24467e+07	4638245	4.24865e+06	5.08819e+06	2.24257e+07	2.21699e+07	2.26196e+07	2.42442e+07	2.37802e+07	2.48109e+07	1.66509e+07	1.47588e+07	1.7178e+07	1.93673e+07	1.86103e+07	1.95923e+07	2.43359e+07
123000000	9.05132e+06	8.56389e+06	9.45872e+06	9.69829e+06	9.52167e+06	9.94892e+06	9.67619e+06	8.50674e+06	1.59713e+07	1.30422e+07	12649896	1.32338e+07	1.08993e+07	1.08074e+07	10989689	1.07913e+07	9.53802e+06	1.12405e+07	1.08879e+07	1.07926e+07	11365015	1.48231e+07	1.43337e+07	15675822	5.4611e+06	5.05734e+06	5.87043e+06	1.24099e+07	1.15929e+07	1.27988e+07	1.21176e+07	1.20369e+07	1.24602e+07	4.64018e+06	4.25005e+06	5.09105e+06	2.24647e+07	2.22064e+07	2.26606e+07	24292286	2.3825e+07	2.48671e+07	1.66726e+07	1.47713e+07	17202729	1.93965e+07	1.86375e+07	1.96232e+07	2.43829e+07
124000000	9.05755e+06	8.56871e+06	9.46667e+06	9.70499e+06	9.52798e+06	9956003	9.68445e+06	8.51191e+06	1.60324e+07	1.30542e+07	12658005	1.32475e+07	1.0907e+07	1.08144e+07	1.09975e+07	1.08001e+07	9.54247e+06	1.12505e+07	1.08964e+07	1.08008e+07	1.13761e+07	1.4841e+07	1.43494e+07	1.57017e+07	5.46353e+06	5.05892e+06	5.87383e+06	1.24216e+07	1.16001e+07	1.28134e+07	1.21287e+07	1.20477e+07	1.24735e+07	4.64208e+06	4.25143e+06	5.09387e+06	2.25033e+07	2.22425e+07	2.27012e+07	2.43398e+07	2.38692e+07	2.49227e+07	1.6694e+07	1.47837e+07	1.72272e+07	1.94254e+07	1.86643e+07	1.96538e+07	2.44292e+07
125000000	9.06368e+06	8.57346e+06	9.47451e+06	9.71158e+06	9.5342e+06	9.96298e+06	9.69259e+06	8.51702e+06	1.60932e+07	1.30661e+07	12666015	1.32611e+07	1.09146e+07	1.08213e+07	1.10051e+07	1.08088e+07	9.54684e+06	1.12603e+07	1.09049e+07	1.08088e+07	1.13871e+07	1.48586e+07	1.43648e+07	15727412	5.46591e+06	5.06047e+06	5.87718e+06	12433093	1.16072e+07	1.28278e+07	12139748	1.20583e+07	1.24866e+07	4.64396e+06	4.25278e+06	5.09665e+06	2.25413e+07	2.22781e+07	2.27413e+07	2.43868e+07	2.3913e+07	2.49778e+07	1.67151e+07	14795846	1.72513e+07	1.9454e+07	1.86908e+07	1.96839e+07	2.44751e+07
126000000	9.06973e+06	8.57813e+06	9.48224e+06	9.71806e+06	9.54033e+06	9.96986e+06	9700615	8.52205e+06	1.61537e+07	1.30778e+07	1.26739e+07	1.32744e+07	10922031	1.08281e+07	11012665	10817374	9.55115e+06	1.12701e+07	1.09132e+07	1.08167e+07	1.13979e+07	1.4876e+07	1.43801e+07	1.57528e+07	5.46826e+06	5.062e+06	5880487	1.24444e+07	1.16141e+07	1.2842e+07	1.21506e+07	1.20688e+07	1.24996e+07	4.6458e+06	4.25412e+06	5.0994e+06	2.25791e+07	2.23133e+07	2.27809e+07	2.44332e+07	2.39562e+07	2.50324e+07	1.67359e+07	1.48078e+07	1.72751e+07	1.94821e+07	1.8717e+07	1.97137e+07	2.45204e+07
127000000	9075686	8.58274e+06	9.48987e+06	9724447	9.54637e+06	9.97663e+06	9.70853e+06	8.527e+06	1.62139e+07	1.30894e+07	1.26817e+07	13287640	1.09294e+07	1.08348e+07	1.10201e+07	1.08258e+07	9.55538e+06	1.12797e+07	1.09214e+07	1.08245e+07	1.14086e+07	14893154	14395105	1.5778e+07	5470575	5.06351e+06	5.88374e+06	1.24556e+07	11621020	1.2856e+07	1.21613e+07	1.20792e+07	1.25124e+07	4647623	4.25543e+06	5.1021e+06	2.26164e+07	2.2348e+07	2.28201e+07	2.44792e+07	2.39989e+07	2.50865e+07	1.67565e+07	1.48196e+07	1.72986e+07	1.95099e+07	1.87429e+07	1.97432e+07	2.45652e+07
128000000	9.08156e+06	8.58728e+06	9.4974e+06	9.73074e+06	9.55233e+06	9.98331e+06	9.71634e+06	8.53188e+06	1.62738e+07	13100793	1.26895e+07	1.33007e+07	1.09367e+07	10841417	1.10274e+07	1.08341e+07	9.55954e+06	1.12891e+07	1.09295e+07	1.08322e+07	1.14192e+07	1.49101e+07	1.44099e+07	1.58029e+07	5.47286e+06	5.06499e+06	5.88696e+06	1.24666e+07	1.16278e+07	1.28698e+07	1.21719e+07	1.20894e+07	1.2525e+07	4.64942e+06	4.25672e+06	5.10476e+06	2.26533e+07	2.23824e+07	2.28588e+07	2.4525e+07	2.40411e+07	2.514e+07	1.67768e+07	1.48312e+07	1.73219e+07	1.95374e+07	1.87684e+07	1.97723e+07	2.46094e+07
129000000	9087356	8.59176e+06	9.50483e+06	9.73695e+06	9.5582e+06	9.9899e+06	9.72404e+06	8.5367e+06	16333399	1.3112e+07	1.26982e+07	1.33136e+07	1.09439e+07	1.08479e+07	1.10347e+07	1.08424e+07	9.56364e+06	1.12984e+07	10937510	1.08398e+07	1.14297e+07	1.49268e+07	1.44246e+07	1.58275e+07	5.4751e+06	5.06645e+06	5.89012e+06	1.24775e+07	1.16345e+07	1.28835e+07	1.21823e+07	1.20995e+07	1.25375e+07	4.65118e+06	4.258e+06	5.10739e+06	2.26897e+07	2.24163e+07	2.2897e+07	2.45702e+07	2.40828e+07	2.5193e+07	1.67968e+07	1.48427e+07	1.73448e+07	1.95645e+07	1.87936e+07	1.9801e+07	2.46532e+07
130000000	9.09307e+06	8.59617e+06	9.51216e+06	9.74307e+06	9.56398e+06	9.9964e+06	9.73164e+06	8.54144e+06	1.63927e+07	1.31232e+07	1.27078e+07	1.33263e+07	10951008	1.08543e+07	11041798	1.08505e+07	9567664	1.13076e+07	1.09454e+07	1.08473e+07	1.14401e+07	1.49434e+07	1.4439e+07	1.58519e+07	5.47732e+06	5.06789e+06	5.89324e+06	1.24882e+07	1.16411e+07	1.28971e+07	12192600	1.21094e+07	1.25499e+07	4.65292e+06	4.25926e+06	5.10998e+06	2.27257e+07	2.24498e+07	2.29348e+07	2.46149e+07	2.4124e+07	2.52455e+07	1.68166e+07	1.48539e+07	1.73675e+07	1.95913e+07	1.88185e+07	19829384	2.46965e+07
131000000	9.0987e+06	8.60051e+06	9.5194e+06	9.74911e+06	9.56969e+06	1.00028e+07	9739132	8.54612e+06	16451762	13134127	1.27173e+07	1.33388e+07	1.0958e+07	1.08606e+07	1.10488e+07	1.08584e+07	9.57163e+06	1.13167e+07	1.09532e+07	1.08546e+07	1.14504e+07	1.49597e+07	1.44533e+07	1.58761e+07	5.4795e+06	5.06931e+06	5.89632e+06	1.24988e+07	1.16476e+07	1.29104e+07	1.22027e+07	1.21192e+07	1.2562e+07	4.65464e+06	4260495	5.11253e+06	2.27613e+07	2.24828e+07	2.29722e+07	2.46592e+07	2.41648e+07	2.52975e+07	1.68361e+07	1.4865e+07	1.73898e+07	1.96178e+07	1.88431e+07	1.98574e+07	2.47392e+07
132000000	9.10426e+06	8.60479e+06	9.52654e+06	9.75506e+06	9.57531e+06	1.00091e+07	9.74653e+06	8.55073e+06	1.65105e+07	13144948	1.27267e+07	1.33512e+07	1.0965e+07	1.08668e+07	1.10558e+07	1.08663e+07	9.57553e+06	11325671	1.09609e+07	1.08619e+07	1.14606e+07	1.49758e+07	1.44674e+07	1.59e+07	5.48165e+06	5.07071e+06	5.89936e+06	1.25093e+07	1.1654e+07	1.29236e+07	1.22128e+07	1.21289e+07	1.25741e+07	4.65633e+06	4.26172e+06	5.11505e+06	2.27965e+07	2.25155e+07	2.30092e+07	2.47029e+07	24205099	2.53491e+07	1.68553e+07	1.4876e+07	1.74119e+07	1.96439e+07	1.88673e+07	1.98851e+07	24781530
133000000	9.10974e+06	8.60898e+06	9.53359e+06	9.76093e+06	9580861	1.00153e+07	9.75382e+06	8.55528e+06	1.6569e+07	1.31556e+07	1.27359e+07	1.33635e+07	1.09718e+07	1.08729e+07	1.10626e+07	1.0874e+07	9.57937e+06	1.13345e+07	1.09685e+07	1.08691e+07	11470626	1.49917e+07	1.44813e+07	1.59237e+07	5.48377e+06	5.07208e+06	5.90235e+06	1.25197e+07	1.16603e+07	1.29366e+07	1.22226e+07	1.21385e+07	1.2586e+07	4.658e+06	4.26292e+06	5.11753e+06	2.28313e+07	2.25478e+07	2.30456e+07	2.47462e+07	2.42449e+07	2.54001e+07	1.68744e+07	1.48868e+07	1.74338e+07	1.96698e+07	1.88913e+07	1.99125e+07	2.48234e+07
134000000	9.11515e+06	8.61311e+06	9.54055e+06	9.76672e+06	9.58633e+06	1.00215e+07	9.76103e+06	8.55976e+06	1.66272e+07	1.31662e+07	1.2745e+07	1.33756e+07	1.09785e+07	1.08789e+07	11069343	1.08817e+07	9.58315e+06	1.13432e+07	1.0976e+07	1.08762e+07	1.14806e+07	1.50074e+07	1.4495e+07	1.59472e+07	5.48587e+06	5.07344e+06	5.90531e+06	1.25299e+07	1.16665e+07	1.29495e+07	1.22324e+07	1.21479e+07	1.25977e+07	4.65964e+06	4.2641e+06	5.11998e+06	2.28657e+07	2.25797e+07	2.30816e+07	2.47891e+07	2.42843e+07	2.54507e+07	1.68932e+07	1.48974e+07	1.74553e+07	1.96953e+07	1.8915e+07	1.99396e+07	2.48647e+07
135000000	9.12048e+06	8.61719e+06	9.54743e+06	9.77243e+06	9.59173e+06	1.00275e+07	9.76813e+06	8.56419e+06	1.66851e+07	1.31766e+07	1.2754e+07	1.33875e+07	1.09852e+07	1.08849e+07	1.1076e+07	1.08892e+07	9.58686e+06	1.13518e+07	10983370	1.08831e+07	11490450	15022885	1.45086e+07	1.59704e+07	5.48793e+06	5.07478e+06	5908222	12540075	1.16727e+07	1.29623e+07	12242018	1.21572e+07	1.26094e+07	4661265	4.26527e+06	5.1224e+06	2.28997e+07	2.26113e+07	2.31171e+07	2.48314e+07	2.43233e+07	25500857	16911698	1.49078e+07	1.74766e+07	1.97205e+07	1.89385e+07	1.99664e+07	2.49056e+07
136000000	9.12575e+06	8.6212e+06	9.55421e+06	9.77806e+06	9.59705e+06	1.00335e+07	9.77515e+06	8.56855e+06	1.67428e+07	1.31868e+07	1.27628e+07	1.33993e+07	1.09917e+07	1.08907e+07	11082560	1.08966e+07	9.59053e+06	1.13603e+07	1.09907e+07	1.089e+07	1.15002e+07	1.50382e+07	1.45219e+07	1.59935e+07	5.48996e+06	5076092	5.9111e+06	1.25501e+07	1.16787e+07	1.29749e+07	1.22515e+07	1.21664e+07	1.26208e+07	4.66286e+06	4.26642e+06	5.12479e+06	2.29333e+07	2.26424e+07	2.31523e+07	2.48733e+07	2.43618e+07	2.55505e+07	1.693e+07	1.49182e+07	1.74977e+07	1.97454e+07	1.89616e+07	1.99928e+07	2.49461e+07
137000000	9.13094e+06	8.62516e+06	9.56092e+06	9.78362e+06	9.6023e+06	1.00394e+07	9.78207e+06	8.57285e+06	1.68001e+07	1.3197e+07	1.27716e+07	1.3411e+07	1.09982e+07	1.08965e+07	1.1089e+07	1.0904e+07	9594131	1.13687e+07	1.09979e+07	1.08968e+07	1.15099e+07	1.50533e+07	1.45351e+07	1.60163e+07	5.49197e+06	5.07739e+06	5.91393e+06	1.256e+07	1.16847e+07	1.29873e+07	1.22609e+07	1.21754e+07	1.26322e+07	4.66444e+06	4.26756e+06	5.12714e+06	2.29666e+07	2.26732e+07	2.31871e+07	2.49148e+07	2.43999e+07	2.55997e+07	1.69481e+07	1.49283e+07	1.75185e+07	1.977e+07	1.89845e+07	2.00189e+07	2.49861e+07
138000000	9.13607e+06	8.62907e+06	9.56753e+06	9.7891e+06	9.60749e+06	1.00453e+07	9.78891e+06	8.5771e+06	1.68572e+07	1.3207e+07	1.27802e+07	1.34226e+07	1.10046e+07	1.09022e+07	1.10954e+07	1.09112e+07	9597681	1.1377e+07	1.1005e+07	10903518	1.15194e+07	1.50683e+07	1.45482e+07	16038859	5.49395e+06	5.07867e+06	5.91673e+06	1.25697e+07	1.16906e+07	1.29996e+07	1.22702e+07	1.21844e+07	12643408	4.666e+06	4.26868e+06	5.12946e+06	2.29996e+07	2.27037e+07	2.32215e+07	2.49558e+07	2.44376e+07	2.56485e+07	1.6966e+07	1.49384e+07	1.7539e+07	1.97944e+07	1.90071e+07	2.00448e+07	2.50257e+07
139000000	9.14112e+06	8.63293e+06	9574071	9.79451e+06	9.6126e+06	1.0051e+07	9.79566e+06	8.58129e+06	1.69141e+07	1.32169e+07	1.27887e+07	1.3434e+07	1.10109e+07	1.09079e+07	1.11017e+07	1.09184e+07	9.60118e+06	1.13851e+07	11011978	1.09101e+07	1.15289e+07	15083058	1.45611e+07	1.60612e+07	5.4959e+06	5.07993e+06	5.9195e+06	1.25794e+07	1.16965e+07	1.30117e+07	1.22793e+07	1.21932e+07	1.26545e+07	4.66753e+06	4.26979e+06	5.13175e+06	2.30321e+07	2.27338e+07	2.32556e+07	2.49964e+07	2.44749e+07	2.56969e+07	1.69836e+07	1.49482e+07	1.75594e+07	1.98184e+07	1.90294e+07	20070326	2.50648e+07
140000000	9.14612e+06	8636728	9.58053e+06	9.79985e+06	9.61764e+06	1.00567e+07	9.80232e+06	8.58542e+06	1.69707e+07	1.32266e+07	1.27971e+07	13445219	1.10171e+07	1.09135e+07	1.1108e+07	1.09255e+07	9.60462e+06	1.13932e+07	1.10189e+07	1.09167e+07	1.15388e+07	1.50977e+07	1.45738e+07	1.60834e+07	5.49782e+06	5.08117e+06	5.92222e+06	1.25889e+07	1.17022e+07	1.30238e+07	12288327	12201931	12665462	4.66904e+06	4.27088e+06	5.13401e+06	2.30643e+07	2.27635e+07	2.32892e+07	2.50366e+07	2.45117e+07	2.57448e+07	1.70011e+07	1.4958e+07	1.75794e+07	1.98422e+07	1.90515e+07	20095584	2.51035e+07
141000000	9.15105e+06	8.64048e+06	9.58691e+06	9.80512e+06	9.62262e+06	1.00623e+07	9.8089e+06	8.5895e+06	1.7027e+07	1.32363e+07	1.28054e+07	1.34564e+07	1.10232e+07	1.09191e+07	11114098	1.09324e+07	9.60801e+06	1.14012e+07	1.10257e+07	1.09231e+07	1.15497e+07	1.51121e+07	1.45864e+07	1.61054e+07	5.49972e+06	5.0824e+06	5.92491e+06	1.25983e+07	1.17079e+07	1.30356e+07	1.22972e+07	1.22105e+07	1.26763e+07	4.67054e+06	4271951	5.13624e+06	2.30962e+07	2.27929e+07	2.33225e+07	2.50763e+07	2.45482e+07	2.57923e+07	1.70183e+07	1.49676e+07	1.75993e+07	1.98657e+07	1.90733e+07	2.01206e+07	2.51419e+07
142000000	9.15591e+06	8.64418e+06	9.59321e+06	9.81032e+06	9.62753e+06	1.00678e+07	9.8154e+06	8.59353e+06	1.7083e+07	1.32458e+07	12813622	1.34674e+07	1.10292e+07	1.09246e+07	11120161	10939307	9.61135e+06	1.1409e+07	1.10325e+07	1.09295e+07	1.15604e+07	1.51263e+07	1.45988e+07	1.61272e+07	5.5016e+06	5.08361e+06	5.92757e+06	1.26075e+07	1.17135e+07	1.30474e+07	1.2306e+07	1.2219e+07	1.2687e+07	4.67201e+06	4.27301e+06	5.13845e+06	2.31277e+07	2.2822e+07	2.33555e+07	2.51156e+07	2.45843e+07	25839351	17035323	1.49771e+07	1.76189e+07	1.98889e+07	1.90949e+07	2.01453e+07	2.51798e+07
143000000	9.16071e+06	8.64783e+06	9.59943e+06	9.81546e+06	9.63238e+06	1.00732e+07	9.82181e+06	8.5975e+06	1.71388e+07	13255165	1.28217e+07	1.34782e+07	1.10352e+07	1.093e+07	1.11261e+07	1.09461e+07	9.61465e+06	1.14168e+07	11039147	1.09358e+07	1.15711e+07	1.51404e+07	1.4611e+07	1.61488e+07	5.50345e+06	5.0848e+06	5930192	1.26167e+07	1.1719e+07	1.3059e+07	1.23147e+07	1.22274e+07	1.26976e+07	4.67346e+06	4.27406e+06	5.14062e+06	2.31589e+07	2.28507e+07	2.33881e+07	2.51546e+07	2.46199e+07	2.5886e+07	1.70521e+07	1.49864e+07	1.76383e+07	1.99118e+07	1.91162e+07	2.01697e+07	2.52173e+07
144000000	9.16545e+06	8.65143e+06	9.60558e+06	9.82053e+06	9.63717e+06	1.00786e+07	9828152	8.60142e+06	1.71944e+07	1.32644e+07	1.28297e+07	1.3489e+07	11041118	1.09354e+07	1.11321e+07	1.09528e+07	9.61789e+06	1.14244e+07	1.10457e+07	1.0942e+07	1.15816e+07	1.51543e+07	1.46231e+07	1.61701e+07	5.50527e+06	5.08598e+06	5.93278e+06	1.26258e+07	1.17245e+07	1.30705e+07	1.23233e+07	1.22357e+07	1.27081e+07	4.6749e+06	4.27509e+06	5.14277e+06	2.31896e+07	2.28792e+07	2.34203e+07	2.51931e+07	2.46553e+07	2.59297e+07	1.70688e+07	1.49957e+07	1.76575e+07	1.99345e+07	19137301	2.01938e+07	2.52547e+07
145000000	9.17014e+06	8.65499e+06	9.61166e+06	9.82553e+06	9.6419e+06	1.00839e+07	9.83441e+06	8.60529e+06	1.72496e+07	13273617	12837582	1.34996e+07	1.10469e+07	1.09407e+07	1.11379e+07	1.09594e+07	9621085	1.1432e+07	1.10522e+07	1.09481e+07	1.15921e+07	1.51681e+07	1.46351e+07	1.61913e+07	5.50707e+06	5.08714e+06	5.93534e+06	1.26347e+07	1.17299e+07	1.30819e+07	12331812	12243917	1.27185e+07	4.67631e+06	4.27611e+06	5.14489e+06	2.322e+07	2.29073e+07	2.34522e+07	2.52312e+07	2.46902e+07	2.59719e+07	1.70852e+07	1.50048e+07	17676432	1.9957e+07	1.91581e+07	2.02177e+07	2.52917e+07
146000000	9.17476e+06	8.6585e+06	9.61766e+06	9.83047e+06	9.64656e+06	1.00892e+07	9.8406e+06	8.60911e+06	1.73047e+07	1.32827e+07	1.28454e+07	1.35102e+07	1.10527e+07	1.09459e+07	1.11436e+07	1.0966e+07	9.62423e+06	1.14395e+07	1.10586e+07	1.09541e+07	1.16025e+07	1.51817e+07	1.46469e+07	1.62124e+07	5.50885e+06	5.08828e+06	5.93786e+06	1.26435e+07	1.17352e+07	1.30931e+07	1.23402e+07	1.2252e+07	1.27287e+07	4677711	4.27711e+06	5.14698e+06	2.325e+07	2.29351e+07	2.34838e+07	25268996	2.47247e+07	2.60137e+07	1.71014e+07	1.50137e+07	1.76952e+07	1.99792e+07	1.91788e+07	2.02413e+07	25328413
147000000	9.17933e+06	8.66196e+06	9.6236e+06	9.83535e+06	9.65117e+06	1.00944e+07	9.8467e+06	8.61288e+06	1.73595e+07	1.32916e+07	1.28531e+07	1.35206e+07	1.10584e+07	1.0951e+07	11149337	1.09724e+07	9.62734e+06	1.14469e+07	1.1065e+07	1.09601e+07	1.16127e+07	1.51951e+07	14658628	1.62332e+07	5.51061e+06	5.08941e+06	5.94035e+06	1.26523e+07	1.17405e+07	1.31042e+07	1.23485e+07	1.226e+07	1.27389e+07	4.67909e+06	4.27811e+06	5.14905e+06	2.32797e+07	2.29626e+07	2.3515e+07	2.53064e+07	2.4759e+07	2.60551e+07	1.71175e+07	1.50226e+07	1.77137e+07	2.00011e+07	1.91991e+07	2.02647e+07	2.53647e+07
148000000	9.18384e+06	8.66538e+06	9.62946e+06	9.84017e+06	9.65572e+06	1.00995e+07	9.85274e+06	8.61661e+06	1.7414e+07	1.33005e+07	1.28607e+07	1.35309e+07	1.1064e+07	1.09561e+07	1.1155e+07	1.09788e+07	9.6304e+06	1.14542e+07	1.10712e+07	10966012	1.16229e+07	1.52084e+07	1.46702e+07	1.62538e+07	5512340	5.09053e+06	5.94282e+06	1.26609e+07	1.17456e+07	1.31152e+07	1.23567e+07	1.22679e+07	1.27489e+07	4.68045e+06	4.27908e+06	5.15109e+06	2.33091e+07	22989759	2.3546e+07	2.53434e+07	2.47928e+07	2.60961e+07	1.71333e+07	1.50313e+07	1.7732e+07	2.00228e+07	1.92193e+07	20287823	2.54007e+07
149000000	9.18829e+06	8.66876e+06	9.63526e+06	9.84493e+06	9.66021e+06	1.01045e+07	9.8587e+06	8.62029e+06	1.74683e+07	1.33092e+07	1.28682e+07	1.3541e+07	1.10695e+07	1.09611e+07	1.11605e+07	1.09851e+07	9.63342e+06	1.14614e+07	11077432	10971839	1.1633e+07	1.52215e+07	1.46816e+07	1.62743e+07	5.51405e+06	5091628	5.94525e+06	1.26694e+07	1.17508e+07	1.31261e+07	1.23647e+07	1.22757e+07	1.27588e+07	4.6818e+06	4.28005e+06	5.1531e+06	2.33381e+07	2.30167e+07	2.35766e+07	2.538e+07	2.48263e+07	2.61367e+07	1.7149e+07	1.504e+07	1.77502e+07	2.00443e+07	1.92392e+07	2.03107e+07	2.54362e+07
150000000	9192691	8.67209e+06	9.64099e+06	9.84963e+06	9.66465e+06	1.01095e+07	9.86459e+06	8.62392e+06	1.75223e+07	1.33178e+07	1.28756e+07	1.35511e+07	1.1075e+07	1.0966e+07	1.1166e+07	1.09913e+07	9.63639e+06	11468477	1.10835e+07	1.09776e+07	1.1643e+07	1.52345e+07	1.46929e+07	1.62945e+07	5.51574e+06	5.09271e+06	5.94765e+06	1.26778e+07	1.17558e+07	1.31368e+07	1.23727e+07	1.22834e+07	1.27686e+07	4.68312e+06	4.281e+06	5.1551e+06	2.33669e+07	2.30433e+07	23606842	2.54163e+07	2.48594e+07	2.6177e+07	1.71645e+07	15048483	1.77681e+07	2.00655e+07	1.92589e+07	2.03333e+07	2.54714e+07
151000000	9.19704e+06	8675386	9.64665e+06	9.85427e+06	9.66903e+06	1.01145e+07	9.87042e+06	8.62751e+06	1.75761e+07	1.33264e+07	1.28829e+07	1.3561e+07	11080363	1.09709e+07	1.11714e+07	1.09975e+07	9.63932e+06	1.14755e+07	1.10896e+07	1.09833e+07	1.16529e+07	1.52473e+07	1.4704e+07	1.63147e+07	5.51741e+06	5.09378e+06	5.95002e+06	1.26862e+07	1.17608e+07	1.31475e+07	12380618	12291019	1.27783e+07	4684435	4.28195e+06	5.15706e+06	2.33953e+07	2.30696e+07	2.36368e+07	2.54522e+07	2.48923e+07	2.62168e+07	1.71799e+07	15056885	1.77858e+07	2.00865e+07	1.92784e+07	2.03557e+07	2.55063e+07
152000000	9201332	8.67864e+06	9.65225e+06	9.85885e+06	9.67336e+06	1.01193e+07	9.87617e+06	8.63105e+06	1.76297e+07	1.33348e+07	1.28901e+07	1.35709e+07	1.10857e+07	1.09757e+07	1.11767e+07	1.10036e+07	9642214	1.14825e+07	1.10955e+07	1.09889e+07	1.16628e+07	1.526e+07	14715057	1.63346e+07	5.51905e+06	5.09484e+06	5.95237e+06	1.26944e+07	1.17658e+07	1.3158e+07	1.23884e+07	1.22985e+07	1.27879e+07	4.68573e+06	4.28288e+06	5.15901e+06	2.34235e+07	2.30956e+07	2.36665e+07	25487736	2.49247e+07	2.62563e+07	1.7195e+07	1.50652e+07	1.78033e+07	2.01073e+07	1.92977e+07	2.03778e+07	2.55408e+07
153000000	9.20557e+06	8.68185e+06	9.65779e+06	9.86338e+06	9.67764e+06	10124144	9.88186e+06	8.63455e+06	1.7683e+07	1.33431e+07	12897290	1.35806e+07	1.1091e+07	1.09805e+07	1.1182e+07	1.10096e+07	9.64507e+06	11489332	1.11014e+07	1.09944e+07	1.16725e+07	1.52726e+07	1.4726e+07	16354349	5.52068e+06	5.09589e+06	5.95468e+06	1.27025e+07	1.17707e+07	1.31684e+07	1.23961e+07	1.2306e+07	1.27974e+07	4.68701e+06	4.28379e+06	5.16093e+06	2.34514e+07	2.31214e+07	2.36959e+07	2.55229e+07	2.49569e+07	26295442	1.721e+07	1.50734e+07	1.78207e+07	2.01279e+07	1.93168e+07	2.03996e+07	25574970
154000000	9.20977e+06	8.68502e+06	9.66326e+06	9.86786e+06	9.68186e+06	10128899	9.88748e+06	8.63801e+06	1.77361e+07	1.33514e+07	1.29044e+07	1.35903e+07	1.10962e+07	1.09852e+07	1.11872e+07	1.10155e+07	9.64788e+06	1.14961e+07	1.11073e+07	10999932	1.16822e+07	1.5285e+07	1.47367e+07	1.63739e+07	5.52229e+06	5.09692e+06	5.95697e+06	1.27106e+07	1.17755e+07	1.31787e+07	1.24038e+07	1.23133e+07	1.28069e+07	4.68827e+06	4.2847e+06	5.16282e+06	2.3479e+07	2.31468e+07	2.37249e+07	2.55576e+07	2.49887e+07	26334203	1.72248e+07	1.50814e+07	1.78378e+07	2.01482e+07	1.93357e+07	2.04211e+07	2.56088e+07
155000000	9213910	8.68815e+06	9.66867e+06	9.87228e+06	9.68604e+06	1.01336e+07	9893032	8.64143e+06	17788924	1.33595e+07	1.29113e+07	1.35998e+07	1.11013e+07	1.09898e+07	1.11924e+07	1.10214e+07	9.65065e+06	1.15028e+07	1.1113e+07	1.10054e+07	1.16918e+07	1.52973e+07	1.47474e+07	1.63934e+07	5523874	5.09793e+06	5.95923e+06	1.27185e+07	1.17803e+07	1.31889e+07	12411286	1.23206e+07	12816169	4.68952e+06	4.2856e+06	5.1647e+06	2.35063e+07	2.31721e+07	2.37537e+07	2.55919e+07	2.50202e+07	2.63726e+07	1.72395e+07	1.50894e+07	1.78548e+07	2.01683e+07	1.93543e+07	2.04425e+07	2.56423e+07
156000000	9.218e+06	8.69124e+06	9.67402e+06	9876649	9.69016e+06	1.01382e+07	9.89852e+06	8644800	1.78415e+07	1.33676e+07	1.29182e+07	1.36092e+07	1.11064e+07	1.09944e+07	11197495	1.10272e+07	9.65339e+06	1.15095e+07	1.11187e+07	1.10107e+07	1.17013e+07	1.53094e+07	1.47579e+07	1.64126e+07	5.52544e+06	5.09894e+06	5.96146e+06	1.27264e+07	11784969	13199026	12418734	1.23278e+07	1.28254e+07	4.69075e+06	4.28648e+06	5.16655e+06	2.35333e+07	2.3197e+07	2.37822e+07	2.56258e+07	2.50514e+07	2.64107e+07	1.72539e+07	1.50973e+07	17871608	2.01882e+07	19372785	2.04635e+07	2.56755e+07
157000000	9222050	8.69429e+06	9.67932e+06	9.88097e+06	9694234	1.01428e+07	9.90395e+06	8.64813e+06	1.78939e+07	1.33755e+07	1.29251e+07	1.36186e+07	1.11114e+07	1.09989e+07	1.12025e+07	1.10329e+07	9.65609e+06	1.1516e+07	1.11244e+07	1.1016e+07	1.17107e+07	15321461	1.47683e+07	1.64317e+07	5526990	5.09993e+06	5963671	1.27341e+07	1.17896e+07	1.3209e+07	1.24261e+07	1.23349e+07	1.28345e+07	4.69197e+06	4.28735e+06	5168378	2.35601e+07	2.32217e+07	23810409	2.56595e+07	25082287	26448372	1.72683e+07	1.51051e+07	1.78882e+07	2.02079e+07	1.93911e+07	2.04844e+07	2.57083e+07
158000000	9226049	8.69731e+06	9.68455e+06	9.88523e+06	9.69826e+06	10147362	9909320	8.65143e+06	1.79461e+07	1.33834e+07	12931805	13627790	11116373	11003339	11207507	11038566	9.65875e+06	1.15225e+07	1.11299e+07	1.10212e+07	1.172e+07	15333346	1.47786e+07	1.64507e+07	5.52852e+06	5.10091e+06	5.96585e+06	1.27418e+07	11794227	1.32189e+07	1.24334e+07	1.23419e+07	1.28435e+07	4.69317e+06	4.28822e+06	5.17019e+06	2.35865e+07	2.32461e+07	2.38383e+07	2.56928e+07	2.51129e+07	2.64857e+07	1.72825e+07	1.51128e+07	1.79047e+07	2.02274e+07	1.94091e+07	20505072	25740830
159000000	9.23e+06	8.7003e+06	9.68973e+06	9.88945e+06	9.70224e+06	1.01518e+07	9.91463e+06	8.65469e+06	1.7998e+07	1.33912e+07	1.29385e+07	1.36369e+07	1.11213e+07	1.10077e+07	1.12124e+07	1.10442e+07	9.66138e+06	1.15289e+07	11135411	1.10264e+07	1.17293e+07	1.53451e+07	1.47888e+07	1.64695e+07	5.53003e+06	5.10188e+06	5.96801e+06	1.27494e+07	1.17988e+07	1.32287e+07	1.24406e+07	1.23489e+07	12852467	4.69436e+06	4.28907e+06	5.17197e+06	2.36128e+07	2.32703e+07	2.3866e+07	2.57258e+07	2.51431e+07	2.65228e+07	17296476	1.51204e+07	1.79209e+07	2.02466e+07	1.9427e+07	2.05255e+07	2.5773e+07
160000000	9.23391e+06	8.70324e+06	9.69485e+06	9.89362e+06	9.70617e+06	10156273	9.91987e+06	8.6579e+06	1.80497e+07	1.33989e+07	1.29451e+07	1.3646e+07	1.11261e+07	1.10121e+07	11217287	1.10497e+07	9.66397e+06	1.15352e+07	1.11408e+07	1.10315e+07	1.17385e+07	15356735	1.47989e+07	16488128	5.53153e+06	5.10283e+06	5.97014e+06	1.27569e+07	11803272	1.32384e+07	1.24477e+07	1.23557e+07	1.28613e+07	4.69553e+06	4.28991e+06	5.17374e+06	2.36387e+07	2.32938e+07	2.38934e+07	25758459	2.51731e+07	2.65595e+07	1.73103e+07	1.51279e+07	1.7937e+07	2.02657e+07	1.94447e+07	2.05458e+07	2.58049e+07
161000000	9.23777e+06	8.70615e+06	9.69991e+06	9.89774e+06	9.71006e+06	1.01607e+07	9.92506e+06	8.66108e+06	1.81012e+07	1.34065e+07	1.29516e+07	1.36549e+07	11130913	1.10164e+07	1.12221e+07	1.10552e+07	9.66653e+06	1.15415e+07	1.11462e+07	1.10366e+07	1.17476e+07	1.53682e+07	1.48089e+07	1.65066e+07	5.533e+06	5.10378e+06	5.97225e+06	1.27644e+07	1.18077e+07	1.3248e+07	1.24547e+07	1.23625e+07	1.28701e+07	4.69669e+06	4.29074e+06	5.17549e+06	23664405	2.33171e+07	2.39205e+07	2.57908e+07	2.52028e+07	2.65958e+07	1.73241e+07	1.51353e+07	17952958	2.02846e+07	19462245	2.05658e+07	2.58365e+07
162000000	9.24159e+06	8.70903e+06	9.70492e+06	9.90181e+06	9.7139e+06	10164980	9.93019e+06	8664227	1.81524e+07	1.3414e+07	1.2958e+07	1.36638e+07	1.11356e+07	1.10206e+07	11226843	1.10606e+07	9.66905e+06	1.15477e+07	1.11515e+07	1.10416e+07	1.17567e+07	1.53796e+07	1.48187e+07	1.6525e+07	5.53446e+06	5104709	5.97433e+06	1.27717e+07	1.18126e+07	1.32575e+07	1.24617e+07	12369214	1.28788e+07	4.69784e+06	4.29157e+06	5.17721e+06	2.36898e+07	2.33401e+07	2.39474e+07	2.58229e+07	2.52322e+07	2.66319e+07	1.73376e+07	1.51426e+07	1.79687e+07	2.03033e+07	1.94796e+07	2.05856e+07	2.58678e+07
163000000	9.24537e+06	8.71187e+06	9.70988e+06	9.90583e+06	9.7177e+06	1.01693e+07	9.93527e+06	8.66733e+06	1.82034e+07	1.34215e+07	1.29644e+07	1.36726e+07	1.11403e+07	1.10248e+07	1.12315e+07	1.10659e+07	9.67154e+06	1.15538e+07	1.11568e+07	1.10465e+07	1.17656e+07	1.53909e+07	1.48285e+07	16543140	5.5359e+06	5.10563e+06	5.97639e+06	1.2779e+07	1.18176e+07	1.32669e+07	1.24686e+07	1.23759e+07	1.28874e+07	4.69897e+06	4.29238e+06	5.17892e+06	2.3715e+07	2.33628e+07	2.3974e+07	2.58547e+07	2.52613e+07	2.66676e+07	1.73511e+07	1.51498e+07	1.79843e+07	2.03218e+07	1.94967e+07	2.06052e+07	25898841
164000000	9.2491e+06	8714684	9.71478e+06	9.90981e+06	9.72145e+06	1.01735e+07	9.94029e+06	8.67041e+06	1.82543e+07	1.34288e+07	1.29707e+07	1.36812e+07	1.11449e+07	1.1029e+07	1.12362e+07	11071205	9.674e+06	1.15599e+07	1.1162e+07	1.10514e+07	1.17745e+07	1.5402e+07	1.48381e+07	1.65612e+07	5.53733e+06	5.10654e+06	5.97843e+06	1.27862e+07	1.18225e+07	1.32762e+07	1.24754e+07	1.23824e+07	1.2896e+07	4.70009e+06	4.29318e+06	5.18061e+06	2.374e+07	23385352	2.40003e+07	2.58862e+07	25290150	26703045	1.73644e+07	1.51569e+07	1.79998e+07	20340110	1.95137e+07	2.06247e+07	2.59296e+07
165000000	9.25279e+06	8.71746e+06	9.71963e+06	9.91375e+06	9725167	1.01777e+07	9.94525e+06	8.67344e+06	1.83048e+07	13436103	1.29769e+07	1.36898e+07	1.11495e+07	1.10331e+07	1.12408e+07	1.10764e+07	9.67643e+06	1.15659e+07	1.11671e+07	1.10562e+07	1.17834e+07	15413078	1.48477e+07	1.65791e+07	5.53873e+06	5.10744e+06	5980441	1.27933e+07	1.18273e+07	1.32854e+07	1.24821e+07	1.23889e+07	12904537	4.7012e+06	4.29397e+06	5.18228e+06	2.37647e+07	2.34076e+07	2.40264e+07	25917352	2.53187e+07	2.67382e+07	17377514	1.5164e+07	1.80151e+07	2.03582e+07	19530535	2.06439e+07	2.596e+07
166000000	9.25644e+06	8.72021e+06	9.72443e+06	9.91764e+06	9.72884e+06	1.01818e+07	9.95016e+06	8.67644e+06	18355217	1.34433e+07	1.29831e+07	1.36983e+07	1.1154e+07	1.10371e+07	11245313	1.10816e+07	9.67883e+06	1.15718e+07	1.11722e+07	11060979	1.17921e+07	1.5424e+07	1.48571e+07	1.65968e+07	5540127	5.10833e+06	5982432	1.28003e+07	11832130	1.32945e+07	1.24888e+07	12395330	1.2913e+07	4.70229e+06	4.29476e+06	5.18393e+06	2.37891e+07	2.34297e+07	2.40523e+07	2.59483e+07	2.5347e+07	2.6773e+07	1.73905e+07	1.51709e+07	1.80302e+07	2.03763e+07	1.95472e+07	2.0663e+07	2.59901e+07
167000000	9.26005e+06	8.72292e+06	9.72918e+06	9.92149e+06	9.73247e+06	1.01859e+07	9955017	8.67941e+06	18405374	1.34504e+07	1.29892e+07	1.37068e+07	1.11584e+07	1.10411e+07	11249802	11086716	9.68119e+06	1.15776e+07	1.11772e+07	1.10657e+07	1.18008e+07	15434803	14866462	1.66145e+07	5.5415e+06	5.10921e+06	5984401	12807279	1.18369e+07	1.33036e+07	1.24954e+07	1.24017e+07	1.29213e+07	4.70337e+06	4.29553e+06	5.18556e+06	2.38134e+07	2.34515e+07	2.40779e+07	2.59789e+07	2.5375e+07	26807457	1.74034e+07	1.51778e+07	1.80452e+07	2.03942e+07	1.95636e+07	2.06818e+07	2.602e+07
168000000	9.26362e+06	8.72561e+06	9.73388e+06	9.92529e+06	9.73606e+06	1.01899e+07	9.95982e+06	8682348	1.84553e+07	1.34575e+07	1.29952e+07	1.37151e+07	1.11628e+07	1.10451e+07	1.12542e+07	1.10918e+07	9683530	1.15834e+07	1.11822e+07	1.10704e+07	1.18095e+07	1.54455e+07	1.48757e+07	1.66319e+07	5.54286e+06	5.11007e+06	5.98635e+06	1.28142e+07	1.18416e+07	13312503	1.25019e+07	1.2408e+07	1.29296e+07	4.70444e+06	4.2963e+06	5.18717e+06	2.38374e+07	2.34732e+07	2.41032e+07	2.60092e+07	2.54028e+07	2.68417e+07	1.74161e+07	1.51846e+07	1.806e+07	2.04119e+07	1.958e+07	2.07005e+07	2.60496e+07
169000000	9267153	8.72826e+06	9.73853e+06	9929055	9.7396e+06	1.01939e+07	9964575	8.68525e+06	1.8505e+07	13464459	1.30011e+07	1.37234e+07	1.11671e+07	11049001	1.12586e+07	1.10968e+07	9.68584e+06	1.15892e+07	1.11871e+07	11074985	11818024	1.54561e+07	14884856	16649278	5.54421e+06	5.11093e+06	5.98827e+06	1.2821e+07	1.18462e+07	1.33214e+07	1.25084e+07	1.24142e+07	1.29377e+07	4705499	4.29706e+06	5.18877e+06	2.38611e+07	2.34946e+07	2.41284e+07	2.60393e+07	2.54303e+07	2.68762e+07	1.74288e+07	1.51914e+07	1.80747e+07	2.04294e+07	1.95961e+07	2.0719e+07	2.60789e+07
170000000	9270646	8.73088e+06	9.74314e+06	9.93278e+06	9.74311e+06	1.01979e+07	9.96928e+06	8.68812e+06	1.85546e+07	1.34714e+07	1.3007e+07	1.37316e+07	1.11714e+07	1.10529e+07	1.1263e+07	11101723	9.68812e+06	1.15948e+07	1.1192e+07	1.10795e+07	1.18265e+07	1.54666e+07	1.48939e+07	1.66665e+07	5.54554e+06	5.11178e+06	5990179	1.28277e+07	1.18508e+07	1.33301e+07	1.25147e+07	1.24203e+07	1.29458e+07	4.70654e+06	4.29781e+06	5.19035e+06	2.38847e+07	2.35158e+07	2.41533e+07	2.60691e+07	2.54575e+07	2.69106e+07	1.74412e+07	1.5198e+07	1.80892e+07	2.04468e+07	1.96121e+07	2.07373e+07	2.61079e+07
171000000	9.2741e+06	8.73347e+06	9.74769e+06	9936457	9.74659e+06	1.02018e+07	9973931	8.69096e+06	1.86039e+07	1.34782e+07	13012877	1.37397e+07	1.11757e+07	11056655	1.12673e+07	1.11066e+07	9.69036e+06	1.16005e+07	1.11968e+07	1.10841e+07	1.1835e+07	1.54769e+07	1.49029e+07	1.66836e+07	5.54686e+06	5.11262e+06	5.99206e+06	1.28344e+07	1.18553e+07	1.33388e+07	1.25211e+07	1.24264e+07	1.29539e+07	4.70758e+06	4.29855e+06	5191910	2.3908e+07	2.35367e+07	2.41779e+07	2.60986e+07	2.54845e+07	2.69448e+07	1.74536e+07	1.52046e+07	1.81036e+07	20463939	1.96279e+07	2.07555e+07	2.61367e+07
172000000	9.27752e+06	8.73604e+06	9.7522e+06	9.9401e+06	9750019	1.02057e+07	9.97854e+06	8.69377e+06	1.8653e+07	1.34849e+07	1.30186e+07	1.37477e+07	11179879	1.10604e+07	1.12715e+07	1.11115e+07	9.69259e+06	1.1606e+07	1.12016e+07	1.10885e+07	1.18433e+07	1.54872e+07	1.49117e+07	1.67005e+07	5.54816e+06	5113445	5.99393e+06	1.2841e+07	1.18598e+07	1.33474e+07	1.25273e+07	1.24324e+07	1.29618e+07	4.7086e+06	4.29928e+06	5.19345e+06	2.39311e+07	2.35575e+07	2.42024e+07	2.61278e+07	2.55112e+07	26978661	1.74658e+07	1.52111e+07	1.81179e+07	20480960	1.96436e+07	2.07735e+07	2.61652e+07
173000000	9.2809e+06	8.73858e+06	9.75667e+06	9.9437e+06	9.75342e+06	1.02095e+07	9.98309e+06	8.69654e+06	1.87019e+07	1.34916e+07	1.30244e+07	1.37556e+07	1.1184e+07	1.10641e+07	1.12757e+07	1.11163e+07	9.69478e+06	1.16115e+07	1.12063e+07	1.10929e+07	1.18516e+07	1.54974e+07	1.49205e+07	1.67173e+07	5.54944e+06	5.11426e+06	5.99577e+06	1.28475e+07	11864288	1.3356e+07	1.25335e+07	1.24384e+07	1.29697e+07	4.70961e+06	4.3e+06	5.19498e+06	2.3954e+07	2.35781e+07	2.42266e+07	2.61568e+07	25537737	27012278	1.74779e+07	15218526	1.8132e+07	2.04978e+07	1.96591e+07	2.07912e+07	2.61935e+07
174000000	9.28425e+06	8.74108e+06	9.76108e+06	9.94726e+06	9.75677e+06	1.02133e+07	9.9876e+06	8.69929e+06	1.87506e+07	1.34983e+07	1.303e+07	13763489	1.11881e+07	1.10678e+07	1.12799e+07	1.1121e+07	9.69695e+06	1.16169e+07	1.12109e+07	1.10973e+07	1.18599e+07	15507440	1.49292e+07	1.6734e+07	5.55072e+06	5.11507e+06	5.9976e+06	1.2854e+07	11868689	1.33644e+07	1.25396e+07	1.24443e+07	1.29775e+07	4.71061e+06	4300717	5.19649e+06	2.39766e+07	2.35984e+07	2.42506e+07	2.61856e+07	2.5564e+07	2.70456e+07	1.74899e+07	1.52264e+07	1.8146e+07	2.05145e+07	1.96745e+07	2.08089e+07	2.62215e+07
175000000	9.28756e+06	8.74357e+06	9.76546e+06	9.95079e+06	9.7601e+06	1.02171e+07	9.99206e+06	8.70201e+06	1.87991e+07	1.35048e+07	13035597	1.37713e+07	11192208	1.10714e+07	11284015	1.11257e+07	9699091	1.16223e+07	1.12156e+07	1.11016e+07	1.1868e+07	1.55174e+07	14937802	16750564	5.55197e+06	5.11587e+06	5.9994e+06	1.28604e+07	1.1873e+07	1.33728e+07	1.25457e+07	12450133	12985230	4.7116e+06	4.30142e+06	5.19799e+06	2.39992e+07	2.36186e+07	2.42744e+07	2.62141e+07	2.559e+07	2.70787e+07	1.75018e+07	1.52341e+07	1.81598e+07	20531043	1.96897e+07	2.08263e+07	2.62492e+07
176000000	9.29083e+06	8.74602e+06	9.76979e+06	9.95427e+06	9.76339e+06	1.02208e+07	9.99648e+06	8.7047e+06	18847341	1.35113e+07	1.30411e+07	1.3779e+07	11196230	1.1075e+07	1.12881e+07	1.11303e+07	9.70121e+06	1.16276e+07	11220130	1.11059e+07	1.18762e+07	1.55273e+07	1.49463e+07	16766999	5.55322e+06	5.11667e+06	6.00119e+06	1.28667e+07	1.18774e+07	1.33811e+07	1.25517e+07	1.24559e+07	1.29929e+07	4.71258e+06	4.30212e+06	5.19947e+06	2.40215e+07	2.36386e+07	2.42979e+07	2.62423e+07	2.56158e+07	2.71115e+07	1.75135e+07	1.52418e+07	1.81735e+07	2.05474e+07	1.97047e+07	2.08436e+07	2.62767e+07
177000000	9.29407e+06	8.74845e+06	9.77407e+06	9.95772e+06	9.76664e+06	1.02244e+07	1.00008e+07	8.70735e+06	1.88954e+07	1.35177e+07	1.30466e+07	13786650	1.12002e+07	1.10786e+07	1.12921e+07	1.11349e+07	9.7033e+06	1.16329e+07	1.12246e+07	1.11102e+07	1.18842e+07	1.5537e+07	1.49547e+07	1.67833e+07	5.55445e+06	5117448	6.00295e+06	12873004	1.18816e+07	1.33893e+07	1.25576e+07	1.24616e+07	1.30005e+07	4.71355e+06	4.30282e+06	5.20093e+06	2.40436e+07	2.36584e+07	2.43213e+07	2.62703e+07	2.56413e+07	2.71441e+07	1.75252e+07	15249444	1.81871e+07	2.05636e+07	1.97197e+07	20860770	2.6304e+07
178000000	9.29728e+06	8750848	9.77832e+06	9.96114e+06	9.76986e+06	1.02281e+07	1.00052e+07	8709986	1.89433e+07	1.35241e+07	1.3052e+07	1.37942e+07	1.12041e+07	11082102	1.12961e+07	1.11395e+07	9705362	1.16381e+07	1.12291e+07	1.11143e+07	1.18922e+07	15546723	1.49631e+07	1.67995e+07	5.55567e+06	5118222	6.0047e+06	1.28792e+07	1.18858e+07	1.33974e+07	12563472	1.24673e+07	1.3008e+07	4.7145e+06	4303502	5.20238e+06	2.40655e+07	2.36779e+07	2.43444e+07	2.6298e+07	2.56666e+07	2.71764e+07	1.75367e+07	1.5257e+07	1.82005e+07	2.05797e+07	1.97345e+07	2.08777e+07	2.6331e+07
179000000	9.30045e+06	8.75322e+06	9.78252e+06	9.96452e+06	9773043	1.02317e+07	1.00095e+07	8.71259e+06	1.8991e+07	1.35303e+07	1.30574e+07	1.38017e+07	1.1208e+07	1.10856e+07	1.13001e+07	1.1144e+07	9.7074e+06	1.16433e+07	1.12335e+07	1.11185e+07	1.19002e+07	1.55563e+07	14971347	1.68156e+07	5.55687e+06	5.11899e+06	6.00643e+06	12885358	1.189e+07	1.34055e+07	1.25693e+07	1.24729e+07	1.30155e+07	4.71545e+06	4.30418e+06	5203816	2.40872e+07	2.36973e+07	2.43673e+07	2.63255e+07	2.56917e+07	2.72084e+07	1.75481e+07	1.52644e+07	1.82139e+07	2.05955e+07	1.97491e+07	2.08946e+07	26357814
180000000	9.3036e+06	8.75557e+06	9.78668e+06	9.96786e+06	9.77619e+06	1.02352e+07	10013696	8.71517e+06	1.90385e+07	1.35366e+07	1.30627e+07	1.38092e+07	1.12119e+07	1.1089e+07	1.1304e+07	1.11484e+07	9.70942e+06	1.16484e+07	1.12379e+07	1.11226e+07	1.19081e+07	1.55658e+07	1.49795e+07	1.68315e+07	5.55807e+06	5.11974e+06	6008144	1.28914e+07	1.18942e+07	1.34135e+07	1.2575e+07	1.24784e+07	1.30228e+07	4.71639e+06	4.30485e+06	5.20523e+06	2.41087e+07	2.37166e+07	2.43901e+07	2.63528e+07	2.57166e+07	2.72403e+07	1.75594e+07	1.52718e+07	1.82271e+07	2.06111e+07	1.97636e+07	2.09112e+07	26384368
181000000	9.3067e+06	8.7579e+06	9790804	9.97117e+06	9.77931e+06	1.02387e+07	1.00179e+07	8.71771e+06	1.90858e+07	1.35427e+07	1.30679e+07	13816533	1.12157e+07	1.10924e+07	1.13078e+07	1.11528e+07	9.71141e+06	1.16535e+07	1.12423e+07	1.11267e+07	1.19159e+07	1.55752e+07	1.49876e+07	16847357	5.55925e+06	5.12049e+06	6.00984e+06	1.28975e+07	1.18982e+07	1.34214e+07	1.25807e+07	1.24839e+07	1.30302e+07	4.71731e+06	4.30551e+06	5206639	2.413e+07	2.37356e+07	2.44126e+07	2.63798e+07	2.57412e+07	2.72722e+07	1.75706e+07	1.52791e+07	1.82401e+07	2.06265e+07	1.9778e+07	2.09277e+07	2.64107e+07
182000000	9309782	8.7602e+06	9.79488e+06	9.97444e+06	9.78239e+06	1.02422e+07	1.0022e+07	8.72024e+06	1.91329e+07	1.35488e+07	1.30731e+07	1.38238e+07	1.12195e+07	1.10958e+07	1.13116e+07	1.11572e+07	9.71338e+06	1.16585e+07	1.12466e+07	1.11307e+07	1.19237e+07	1.55845e+07	1.49956e+07	1.68631e+07	5.56041e+06	5121234	6.01152e+06	1.29034e+07	1.19023e+07	1.34292e+07	1.25864e+07	1.24893e+07	1.30374e+07	4.71823e+06	4.30617e+06	5.20803e+06	2.41512e+07	2.37544e+07	24434920	2.64066e+07	2.57657e+07	2.73039e+07	1.75817e+07	1.52864e+07	18253080	20641837	1.97922e+07	2.09441e+07	2.64368e+07
183000000	9.31283e+06	8.76248e+06	9798926	9.97768e+06	9.78544e+06	1.02457e+07	1.00262e+07	8.72273e+06	1.91798e+07	1.35549e+07	1.30783e+07	1.38311e+07	1.12232e+07	1.10991e+07	1.13154e+07	1.11615e+07	9.71533e+06	1.16634e+07	1.12508e+07	1.11347e+07	1.19314e+07	1.55937e+07	1.50036e+07	1.68787e+07	5.56157e+06	5.12197e+06	6.01318e+06	1.29093e+07	1.19063e+07	1.3437e+07	1.2592e+07	12494727	1.30446e+07	4.71914e+06	4.30682e+06	5.2094e+06	2.41721e+07	2.37731e+07	2.44571e+07	2.64332e+07	2.57899e+07	2.73354e+07	17592635	1.52936e+07	1.82659e+07	2.0657e+07	1.98063e+07	2.09603e+07	2.64627e+07
184000000	9.31584e+06	8.76473e+06	9.80293e+06	9.98089e+06	9.78846e+06	10249077	1.00302e+07	8.7252e+06	1.92265e+07	1.35609e+07	1.30834e+07	1.38382e+07	1.12269e+07	1.11024e+07	1.13192e+07	1.11658e+07	9.71725e+06	1.16683e+07	1.1255e+07	1.11386e+07	1.19391e+07	1.56029e+07	1.50115e+07	1.68942e+07	5.56271e+06	5.12269e+06	6.01482e+06	1.29152e+07	1.19103e+07	1.34447e+07	1.25975e+07	1.25001e+07	1.30518e+07	4.72004e+06	4.30746e+06	5.21077e+06	2.41929e+07	2.37916e+07	2.4479e+07	26459548	2.58139e+07	2.73666e+07	17603502	1.53007e+07	1.82786e+07	2.0672e+07	1.98203e+07	2.09764e+07	2.64883e+07
185000000	9.31883e+06	8766958	9.80689e+06	9.98407e+06	9.79145e+06	1.02525e+07	1.00343e+07	8.72765e+06	1.9273e+07	1.35668e+07	1.30884e+07	1.38453e+07	1.12306e+07	1.11056e+07	1.13229e+07	1.117e+07	9.71915e+06	1.16732e+07	1.12592e+07	1.11425e+07	11946665	1.56119e+07	15019239	1.69095e+07	5.56384e+06	5.12341e+06	6.01645e+06	1.2921e+07	1.19142e+07	1.34523e+07	1.2603e+07	1.25053e+07	1.30588e+07	4.72093e+06	4308095	5.21211e+06	2.42134e+07	2.38099e+07	2.45007e+07	2.64857e+07	2.58377e+07	2.73976e+07	1.76143e+07	1.53077e+07	1.82912e+07	20686898	1.98341e+07	2.09923e+07	26513733
186000000	9.32178e+06	8.76916e+06	9.81082e+06	9.98721e+06	9.79441e+06	1.02558e+07	1.00383e+07	8730071	1.93194e+07	1.35727e+07	1.30934e+07	1.38524e+07	1.12342e+07	1.11089e+07	1.13266e+07	1.11742e+07	9.72103e+06	1.1678e+07	1.12633e+07	1.11464e+07	1.19542e+07	1.56209e+07	15026953	1.69248e+07	5.56496e+06	5.12412e+06	6.01806e+06	1.29267e+07	1.19181e+07	1.34599e+07	1.26084e+07	1.25105e+07	1.30658e+07	4.72181e+06	4.30872e+06	5.21345e+06	2.42338e+07	23828101	2.45223e+07	2.65116e+07	25861241	2.74283e+07	1.76249e+07	1.53147e+07	1.83037e+07	2.07016e+07	1.98478e+07	2.10081e+07	2.65389e+07
187000000	9.32471e+06	8.77135e+06	9.81471e+06	9.99032e+06	9.79734e+06	1.02591e+07	1.00422e+07	8.73247e+06	19365519	1.35785e+07	1.30984e+07	1.38593e+07	1.12378e+07	1.1112e+07	1.13302e+07	1.11783e+07	9.72289e+06	1.16828e+07	1.12674e+07	1.11502e+07	1.19617e+07	1.56297e+07	1.50346e+07	1.694e+07	5.56607e+06	5.12482e+06	6.01965e+06	1.29324e+07	1.1922e+07	1.34674e+07	1.26138e+07	12515719	1.30728e+07	4.72268e+06	4309346	5.21477e+06	2.4254e+07	23846092	2.45437e+07	2.65373e+07	2.58846e+07	2.74589e+07	1.76355e+07	1.53216e+07	18316050	2.07163e+07	1.98614e+07	2.10237e+07	2.65639e+07
188000000	9.32761e+06	8.77351e+06	9818560	9.9934e+06	9800243	1.02624e+07	1.00461e+07	8.73484e+06	1.94115e+07	1.35842e+07	1.31033e+07	1.38663e+07	1.12413e+07	1.11151e+07	1.13338e+07	11182436	9.72473e+06	1.16875e+07	11271392	11153960	1.19692e+07	1.56385e+07	15042161	1.6955e+07	5.56717e+06	5.12551e+06	6.02123e+06	1.2938e+07	1.19258e+07	1.34748e+07	1.26191e+07	1.25208e+07	1.30797e+07	4.72354e+06	4.30996e+06	5.21608e+06	2.42741e+07	2.38639e+07	2.45649e+07	2.65627e+07	2.59078e+07	2.74892e+07	17645952	1.53284e+07	1.83283e+07	2.07307e+07	19874866	2.10392e+07	2.65887e+07
189000000	9.33047e+06	8.77565e+06	9.82238e+06	9.99645e+06	9.80311e+06	1.02656e+07	1.005e+07	8.73719e+06	1.94573e+07	1.359e+07	1.31081e+07	1.38731e+07	1.12448e+07	1.11182e+07	1.13374e+07	1.11865e+07	9.72655e+06	1.16921e+07	1.12754e+07	1.11577e+07	1.19766e+07	1.56473e+07	1.50497e+07	1.697e+07	5.56825e+06	5.1262e+06	6.02279e+06	1.29436e+07	1.19296e+07	1.34822e+07	1.26244e+07	1.25259e+07	1.30865e+07	4.72439e+06	4.31057e+06	5.21737e+06	2.42939e+07	2.38816e+07	24585902	2.6588e+07	2.59308e+07	2.75193e+07	1.76563e+07	15335194	1.83404e+07	2.07451e+07	1.98882e+07	2.10545e+07	2.66133e+07
190000000	9.33332e+06	8.77777e+06	9.82616e+06	9.99947e+06	9.80596e+06	1.02688e+07	1.00538e+07	8.73951e+06	1.95029e+07	1.35956e+07	1.31129e+07	1.38799e+07	1.12483e+07	1.11212e+07	1.13409e+07	1.11905e+07	9.72834e+06	1.16968e+07	1.12793e+07	1.11614e+07	1.19839e+07	1.56559e+07	1.50571e+07	1.69848e+07	5.56933e+06	5.12688e+06	6.02434e+06	1.29491e+07	1.19333e+07	1.34895e+07	1.26296e+07	1.25309e+07	1.30932e+07	4.72524e+06	4.31117e+06	5.21865e+06	24313604	2.38991e+07	2.46067e+07	2.6613e+07	2.59536e+07	2.75491e+07	17666586	1.53419e+07	1.83525e+07	2.07593e+07	1.99014e+07	21069769	2.66377e+07
191000000	9.33613e+06	8.77986e+06	9829902	1.00025e+07	9.80877e+06	1.0272e+07	1.00577e+07	8.74181e+06	19548263	1.36012e+07	1.31177e+07	1.38866e+07	1.12517e+07	1.11242e+07	1.13444e+07	1.11945e+07	9.73012e+06	1.17013e+07	1.12832e+07	1.11651e+07	1.19912e+07	1.56645e+07	1.50644e+07	16999554	5.57039e+06	5.12756e+06	6.02587e+06	1.29546e+07	1.1937e+07	1.34967e+07	1.26348e+07	1.25359e+07	1.31e+07	4.72607e+06	4.31177e+06	5.21992e+06	2.43331e+07	2.39164e+07	2.46274e+07	2.66379e+07	2.59762e+07	27578775	17676760	1.53486e+07	1.83644e+07	2.07734e+07	1.99145e+07	2.10849e+07	2.66619e+07
192000000	9.33891e+06	8.78194e+06	9.83361e+06	1.00054e+07	9.81156e+06	1.02752e+07	1.00614e+07	8.74409e+06	1.95935e+07	1.36068e+07	1.31224e+07	1.38933e+07	11255145	1.11271e+07	1.13478e+07	11198463	9.73188e+06	1.17059e+07	1.12871e+07	1.11687e+07	11998486	15672932	1.50717e+07	1.70142e+07	5571446	5128222	6.02739e+06	1.296e+07	1.19407e+07	1.35039e+07	1.26399e+07	1.25408e+07	13106607	4.7269e+06	4.31236e+06	5.22118e+06	2.43524e+07	2.39336e+07	2.46479e+07	2.66625e+07	2.59986e+07	2.76082e+07	1.76868e+07	1.53551e+07	1.83762e+07	2.07874e+07	1.99275e+07	21099814	2.66858e+07
193000000	9.34167e+06	8.78399e+06	9837289	1.00084e+07	9.81432e+06	1.02783e+07	1.00652e+07	8746350	1.96385e+07	1.36123e+07	1.31271e+07	13899920	11258518	1.113e+07	1.13513e+07	1.12024e+07	9.73362e+06	1.17104e+07	1.12909e+07	1.11723e+07	1.20057e+07	1.56813e+07	1.50789e+07	1.70287e+07	5572489	5.12888e+06	6.0289e+06	1.29654e+07	1.19443e+07	1.3511e+07	1.26449e+07	1.25457e+07	1.31132e+07	4.72772e+06	4.31295e+06	5.22243e+06	24371463	2.39506e+07	2.46682e+07	26686973	2.60208e+07	2.76374e+07	1.76968e+07	1.53617e+07	1.83879e+07	2.08012e+07	1.99404e+07	2.11146e+07	2.67096e+07
194000000	9344403	8.78603e+06	9.84093e+06	1.00113e+07	9.81705e+06	10281388	1.00688e+07	8.74858e+06	1.96834e+07	1.36178e+07	1.31317e+07	1.39065e+07	1.12619e+07	1.11329e+07	1.13547e+07	1.12062e+07	9.73533e+06	1.17148e+07	1.12947e+07	1.11759e+07	1.20128e+07	15689659	1.50861e+07	1.70432e+07	5.57352e+06	5.12953e+06	6.03038e+06	1.29707e+07	1.19479e+07	1.35181e+07	1.265e+07	1.25505e+07	1.31197e+07	4.72853e+06	4.31353e+06	5.22366e+06	2.43904e+07	2.39675e+07	2.46883e+07	2.67112e+07	26042807	2.76664e+07	1.77067e+07	1.53681e+07	1.83995e+07	2.08149e+07	1.99531e+07	2.11293e+07	26733144
195000000	9.34711e+06	8.78804e+06	9.84454e+06	1.00141e+07	9.81976e+06	10284448	1.00725e+07	8.7508e+06	1.97281e+07	1.36232e+07	1.31363e+07	1.3913e+07	11265166	1.11357e+07	1.1358e+07	11210082	9.73703e+06	1.17192e+07	1.12985e+07	1.11794e+07	1.20199e+07	1.56979e+07	1.50932e+07	1.70575e+07	5.57454e+06	5.13018e+06	6.03186e+06	1.29759e+07	11951496	1.35251e+07	12654950	12555335	1.31262e+07	4.72934e+06	4314101	5.22488e+06	2.44092e+07	2.39843e+07	24708324	2.67353e+07	2.60647e+07	2.76953e+07	1.77165e+07	15374527	1.8411e+07	2.08285e+07	19965764	2.11439e+07	2.67564e+07
196000000	9.34979e+06	8.79003e+06	9.84812e+06	1.0017e+07	9.82244e+06	1.02875e+07	1.00761e+07	8.75299e+06	1.97726e+07	1.36285e+07	1.31408e+07	1.39194e+07	1.12684e+07	1.11386e+07	11361341	1.12139e+07	9.73872e+06	11723600	1.13022e+07	1.11829e+07	1.2027e+07	1.57061e+07	15100209	1.70717e+07	5.57556e+06	5.13082e+06	6.03332e+06	1.29811e+07	11955031	1.3532e+07	1.26599e+07	1.25601e+07	1.31327e+07	4.73013e+06	4.31467e+06	5.22609e+06	2.44278e+07	24000838	2.47281e+07	2.67591e+07	2.60863e+07	2.77239e+07	1.77263e+07	1.53809e+07	1.84224e+07	2.0842e+07	19978292	21158526	2.67795e+07
197000000	9.35244e+06	8.79201e+06	9.85166e+06	1.00198e+07	9.82509e+06	1.02905e+07	1.00797e+07	8.75516e+06	1.9817e+07	1.36339e+07	1.31453e+07	1.39258e+07	1.12717e+07	1.11414e+07	1.13646e+07	11217645	9.74038e+06	1.17279e+07	1.13059e+07	1.11864e+07	1.2034e+07	1.57142e+07	1.51072e+07	1.70859e+07	5.57656e+06	5.13145e+06	6.03476e+06	1.29863e+07	1.19585e+07	1.35389e+07	1.26648e+07	1.25648e+07	1.3139e+07	4.73092e+06	4.31523e+06	5227288	2.44462e+07	2.40173e+07	2.47478e+07	2.67828e+07	2.61078e+07	2.77523e+07	1.77359e+07	15387161	1.84337e+07	2.08554e+07	1.99907e+07	21173093	2.68024e+07
198000000	9.35507e+06	8.79397e+06	9.85517e+06	1.00226e+07	9.82772e+06	1.02935e+07	1.00833e+07	8.75731e+06	1.98611e+07	1.36391e+07	1.31497e+07	1.39321e+07	1.12749e+07	1.11441e+07	1.13679e+07	1.12214e+07	9.74202e+06	1.17322e+07	1.13096e+07	1.11898e+07	1.2041e+07	1.57222e+07	1.51141e+07	1.70999e+07	5.57755e+06	5.13208e+06	6.0362e+06	1.29914e+07	11962002	1.35457e+07	12669607	1.25694e+07	1.31454e+07	4.7317e+06	4.31579e+06	5.22847e+06	2.44646e+07	2.40336e+07	2.47673e+07	2.68062e+07	2.61291e+07	2.77805e+07	1.77454e+07	1.53934e+07	1.84449e+07	2.08686e+07	2.0003e+07	2.11875e+07	26825141
199000000	9.35768e+06	8.7959e+06	9.85866e+06	1.00254e+07	9.83033e+06	1.02964e+07	10086823	8.75944e+06	1.99051e+07	1.36443e+07	1.31542e+07	1.39384e+07	1.12781e+07	1.11469e+07	11371134	1.12251e+07	9743651	1.17365e+07	1.13132e+07	1.11932e+07	1.20479e+07	1.57302e+07	1.51209e+07	1.71139e+07	5.57854e+06	5.1327e+06	6.03762e+06	1.29965e+07	11965439	1.35524e+07	1.26744e+07	1.2574e+07	1.31516e+07	4.73247e+06	4.31634e+06	5229650	2.44827e+07	2.40497e+07	2.47866e+07	2.68295e+07	2.61502e+07	2.78085e+07	1.77549e+07	1.53996e+07	1.84561e+07	20881762	2.00152e+07	2.12019e+07	2.68477e+07
200000000	9.36026e+06	8.79782e+06	9.86211e+06	1.00281e+07	9.8329e+06	10299317	10090319	8.76155e+06	1.99489e+07	1.36495e+07	1.31585e+07	13944670	1.12812e+07	1.11496e+07	1.13743e+07	1.12287e+07	9.74526e+06	1.17407e+07	1.13168e+07	1.11966e+07	1.20548e+07	1.57381e+07	1.51277e+07	1.71279e+07	5.57951e+06	5.13332e+06	6.03902e+06	1.30015e+07	1.19688e+07	13559144	1.26792e+07	1.25786e+07	1.31579e+07	4.73324e+06	4.31689e+06	5.23081e+06	2.45007e+07	2.40657e+07	2.48058e+07	2.68526e+07	2.61712e+07	2.78363e+07	17764265	1.54057e+07	1.84671e+07	2.08948e+07	2.00273e+07	2.12161e+07	2.687e+07
201000000	9.36281e+06	8.79972e+06	9.86552e+06	1.00308e+07	9835460	1.03022e+07	1.00938e+07	8.76364e+06	1.99926e+07	1.36546e+07	1.31628e+07	1.39509e+07	1.12844e+07	1.11522e+07	1.13775e+07	1.12324e+07	9.74685e+06	1.17448e+07	1.13204e+07	1.11999e+07	1.20616e+07	1.57459e+07	1.51344e+07	1.71418e+07	5.58047e+06	5133924	6040415	1.30065e+07	1.19722e+07	1.35658e+07	1.26839e+07	1.25831e+07	1.3164e+07	4.734e+06	4.31743e+06	5.23197e+06	2.45186e+07	2.40816e+07	2.48248e+07	26875538	2.6192e+07	2.78639e+07	1.77736e+07	1.54118e+07	1.8478e+07	2.09077e+07	2.00393e+07	2.12302e+07	26892203
202000000	9.36535e+06	8.8016e+06	9.86891e+06	1.00335e+07	9.83799e+06	1.03051e+07	1.00972e+07	8.7657e+06	2.0036e+07	1.36597e+07	1.31671e+07	1.3957e+07	11287452	1.11549e+07	1.13807e+07	1.12359e+07	9.74843e+06	1.1749e+07	1.13239e+07	1.12033e+07	1.20684e+07	1.57537e+07	1.5141e+07	1.71556e+07	5.58143e+06	5.13453e+06	6.04179e+06	1.30115e+07	1.19756e+07	1.35724e+07	1.26885e+07	1.25876e+07	1.31702e+07	4.73475e+06	4.31796e+06	5.23311e+06	24536260	2.40973e+07	2.48437e+07	2.68983e+07	2.62126e+07	2.78913e+07	1.77828e+07	1.54178e+07	1.84888e+07	2.09205e+07	2.00512e+07	2.12441e+07	2.69142e+07
203000000	9.36786e+06	8.80346e+06	9.87227e+06	1.00362e+07	9.8405e+06	1.03079e+07	1.01006e+07	8.76775e+06	2.00793e+07	1.36647e+07	1.31714e+07	1.39631e+07	1.12905e+07	1.11575e+07	11383767	1.12395e+07	9.74999e+06	1.17531e+07	1.13274e+07	1.12065e+07	1.20752e+07	1.57613e+07	1.51476e+07	1.71693e+07	5582376	5.13512e+06	6.04316e+06	1.30164e+07	11978874	1.35789e+07	1.26932e+07	1.25921e+07	13176244	4.73549e+06	4.31849e+06	5.23424e+06	24553794	2.41129e+07	2.48624e+07	2.69208e+07	2.62331e+07	2.79185e+07	1.77919e+07	1.54237e+07	1.84995e+07	2.09332e+07	2.0063e+07	2.1258e+07	2.6936e+07
204000000	9.37034e+06	8.80531e+06	9.8756e+06	1.00388e+07	9842983	1.03107e+07	1.0104e+07	8.76978e+06	2.01225e+07	1.36697e+07	1.31756e+07	13969144	1.12936e+07	1.11601e+07	1.13869e+07	1.1243e+07	9.75153e+06	1.17571e+07	11330849	1.12098e+07	1.20819e+07	1.5769e+07	1.51542e+07	1.71829e+07	5.58331e+06	5.13571e+06	6.04452e+06	1.30212e+07	1.19822e+07	1.35854e+07	1.26977e+07	12596472	1.31823e+07	4.73623e+06	4319017	5.23536e+06	2.45712e+07	2.41284e+07	2.48809e+07	2.69432e+07	2.62533e+07	2.79456e+07	17800953	1.54296e+07	1.85102e+07	2.09458e+07	2.00747e+07	2.12717e+07	2.69577e+07
205000000	9.37281e+06	8807139	9.8789e+06	1.00414e+07	9.84544e+06	1.03135e+07	1.01073e+07	8.7718e+06	2.01655e+07	1.36746e+07	1.31798e+07	1.39751e+07	1.12966e+07	11162691	1.13899e+07	1.12465e+07	9.75306e+06	1.17611e+07	1.13343e+07	1.1213e+07	1.20885e+07	15776513	1.51606e+07	17196447	5.58424e+06	5.1363e+06	6.04586e+06	1.3026e+07	1.19854e+07	1.35918e+07	12702282	1.26008e+07	1.31882e+07	4.73696e+06	4.31954e+06	5.23648e+06	2.45884e+07	2.41437e+07	2.48993e+07	2.69654e+07	2.62735e+07	2.79727e+07	17809926	1.54355e+07	1.85207e+07	2.09584e+07	2.00863e+07	2.12853e+07	2.69792e+07
206000000	9.37525e+06	8.80895e+06	9.88217e+06	1.0044e+07	9.84788e+06	1.03163e+07	1.01106e+07	8.77379e+06	2.02083e+07	1.36795e+07	1.31839e+07	1.39811e+07	1.12995e+07	1.11652e+07	1.13929e+07	1.125e+07	9.75457e+06	1.17651e+07	1.13377e+07	1.12162e+07	1.20951e+07	1.5784e+07	1.51671e+07	1.72099e+07	5.58516e+06	5136879	6047188	1.30308e+07	1.19886e+07	1.35982e+07	1.27068e+07	1.26052e+07	1.31942e+07	4737679	4.32005e+06	5.23758e+06	2.46055e+07	2.41589e+07	2.49176e+07	2.69875e+07	2.62934e+07	2.79996e+07	1.78188e+07	1.54413e+07	18531207	2.09708e+07	20097759	2.12989e+07	2.70005e+07
207000000	9.37767e+06	8810745	9885418	1.00466e+07	9.8503e+06	1.0319e+07	1.01139e+07	8.77576e+06	2.02509e+07	1.36844e+07	1.3188e+07	1.3987e+07	1.13025e+07	1.11678e+07	1.13959e+07	1.12534e+07	9.75607e+06	1.17691e+07	11341048	1.12193e+07	1.21017e+07	1.57914e+07	1.51734e+07	1.72232e+07	5.58607e+06	5137453	6.04851e+06	13035505	1.19918e+07	1.36045e+07	1.27112e+07	1.26095e+07	1.32001e+07	4.7384e+06	4.32056e+06	5.23867e+06	24622400	24173985	2.49357e+07	2.70093e+07	2.63132e+07	2.80264e+07	1.78276e+07	1.5447e+07	1.85416e+07	2.09831e+07	2.01092e+07	2.13123e+07	27021604
208000000	9380065	8.81252e+06	9.88863e+06	1.00491e+07	9.85269e+06	1.03217e+07	1.01172e+07	8.77772e+06	20293369	1.36892e+07	1.31921e+07	1.39928e+07	1.13054e+07	1.11703e+07	1.13989e+07	1.12568e+07	9.75755e+06	1.1773e+07	1.13444e+07	1.12225e+07	1.21082e+07	1.57988e+07	1.51797e+07	1.72365e+07	5.58698e+06	5.13802e+06	6.04981e+06	13040187	1.1995e+07	1.36108e+07	1.27157e+07	1.26137e+07	1.32059e+07	4.7391e+06	4.32107e+06	5.23975e+06	2.46392e+07	2.41889e+07	2.49537e+07	2.7031e+07	2.63329e+07	28052945	17836384	1.54527e+07	1.85519e+07	2.09954e+07	20120453	2.13256e+07	2.70426e+07
209000000	9382441	8.81428e+06	9.89182e+06	1.00517e+07	9.85507e+06	1.03244e+07	1.01204e+07	8.77966e+06	2.03357e+07	1.36939e+07	1.31961e+07	1.39986e+07	1.13083e+07	1.11727e+07	11401861	1.12602e+07	9.75902e+06	1.17769e+07	1.13477e+07	1.12256e+07	1.21147e+07	1.58061e+07	15185981	1.72497e+07	5.58787e+06	5.13858e+06	6.05111e+06	1.30448e+07	1.19981e+07	1.3617e+07	1.27201e+07	1.26179e+07	1.32117e+07	4.73981e+06	4.32157e+06	5.24082e+06	2.46559e+07	2.42038e+07	2.49716e+07	2.70525e+07	2.63524e+07	2.80793e+07	1.78451e+07	1.54584e+07	1.85621e+07	2.10075e+07	2.01317e+07	2.13388e+07	2.70634e+07
210000000	9.3848e+06	8.81603e+06	9.89498e+06	1.00542e+07	9857417	10327053	1.01236e+07	8.78158e+06	20377829	1.36987e+07	1.32001e+07	1.40044e+07	1.13112e+07	1.11752e+07	1.14048e+07	1.12635e+07	9760466	11780695	1.1351e+07	1.12286e+07	1.21212e+07	1.58133e+07	1.51922e+07	1.72628e+07	5.58876e+06	5.13914e+06	6.05239e+06	1.30494e+07	1.20012e+07	1.36232e+07	1.27244e+07	12622093	13217437	4.7405e+06	4.32207e+06	5.24188e+06	2.46724e+07	2.42184e+07	2.49893e+07	2.70739e+07	2.63717e+07	2.81067e+07	1.78536e+07	1.5464e+07	1.85722e+07	2.10195e+07	2.01428e+07	2.13518e+07	2.70841e+07
211000000	9.38713e+06	8.81776e+06	9.89812e+06	1.00566e+07	9.85975e+06	1.03297e+07	1.01268e+07	8.78349e+06	2.04198e+07	1.37033e+07	1.3204e+07	1.40101e+07	1.1314e+07	1.11776e+07	1.14077e+07	11266833	9.7619e+06	1.17845e+07	1.13542e+07	1.12317e+07	1.21276e+07	1.58205e+07	1.51983e+07	17275823	5.58964e+06	5.1397e+06	6.05366e+06	1.3054e+07	1.20043e+07	13629334	1.27287e+07	1.26262e+07	1.32231e+07	4.74119e+06	4.32256e+06	5.24294e+06	24688822	2.4233e+07	2.50068e+07	2.70951e+07	2.63909e+07	2.81346e+07	1.78622e+07	1.54695e+07	1.85822e+07	21031429	2.01538e+07	2.13648e+07	27104549
212000000	9389443	8.81947e+06	9.90122e+06	1.00591e+07	9862056	1.03323e+07	1.01299e+07	8.78537e+06	2.04616e+07	1.3708e+07	1.3208e+07	1.40157e+07	1.13169e+07	1.118e+07	1.14105e+07	1.12701e+07	9.76332e+06	1.17883e+07	1.13575e+07	1.12347e+07	1.2134e+07	1.58276e+07	1.52044e+07	1.72888e+07	5.59051e+06	5.14024e+06	6.05492e+06	1.30585e+07	1.20074e+07	1.36354e+07	1.2733e+07	1.26303e+07	1.32288e+07	4.74188e+06	4.32305e+06	5.24398e+06	2.47051e+07	2.42475e+07	2.50242e+07	2.71162e+07	2.641e+07	2.81623e+07	1.78706e+07	1.54751e+07	1.85922e+07	2.10433e+07	2.01647e+07	2.13777e+07	2.71249e+07
213000000	9.39174e+06	8.82117e+06	9.90431e+06	1.00615e+07	9.86434e+06	1.03349e+07	1.0133e+07	8.78724e+06	2.05033e+07	1.37126e+07	1.32118e+07	14021365	1.13197e+07	1.11824e+07	1.14134e+07	1.12734e+07	9.76473e+06	1.1792e+07	1.13606e+07	1.12377e+07	1.21403e+07	1.58347e+07	1.52105e+07	1.73016e+07	5.59137e+06	5.14079e+06	6.05617e+06	1.3063e+07	1.20104e+07	1.36414e+07	1.27372e+07	1.26344e+07	1.32344e+07	4.74256e+06	4.32353e+06	5.24501e+06	2.47212e+07	2.42618e+07	2.50415e+07	2.7137e+07	2.64289e+07	2.81898e+07	1.7879e+07	1.54805e+07	1.86021e+07	2.1055e+07	2.01756e+07	2.13905e+07	2.71451e+07
214000000	9.39401e+06	8.82285e+06	9.90736e+06	1.00639e+07	9.86661e+06	1.03375e+07	10136103	8.7891e+06	2.05448e+07	1.37172e+07	1.32157e+07	1.40269e+07	1.13224e+07	1.11847e+07	1.14162e+07	1.12766e+07	9.76612e+06	1.17957e+07	1.13638e+07	1.12407e+07	1.21466e+07	15841691	1.52165e+07	1.73144e+07	5.59222e+06	5141323	6.05741e+06	1.30674e+07	1.20134e+07	1.36474e+07	1.27414e+07	1.26384e+07	1.324e+07	4.74323e+06	4.32401e+06	5.24604e+06	2.47373e+07	2.42759e+07	2.50587e+07	2.71578e+07	2.64476e+07	2.82172e+07	1.78873e+07	1.54859e+07	1.86119e+07	2.10666e+07	2.01863e+07	2.14032e+07	2.71651e+07
215000000	9.39626e+06	8.82452e+06	9.91039e+06	1.00663e+07	9.86886e+06	1.034e+07	10139163	8.79093e+06	2.05862e+07	13721678	1.32195e+07	14032467	1.13252e+07	1.11871e+07	1.1419e+07	1.12798e+07	9.7675e+06	11799414	11366951	1.12436e+07	1.21529e+07	1.58486e+07	1.52224e+07	1.73271e+07	5.59307e+06	5.14186e+06	6.05863e+06	1.30718e+07	1.20164e+07	1.36534e+07	1.27456e+07	1.26424e+07	1.32455e+07	4.74389e+06	4.32448e+06	5.24705e+06	24753163	2.429e+07	25075728	2.71783e+07	2.64662e+07	2.82444e+07	1.78956e+07	1.54913e+07	1.86216e+07	2.10782e+07	2.0197e+07	2.14157e+07	2.7185e+07
216000000	9.39849e+06	8.82617e+06	9.9134e+06	1.00687e+07	9871089	10342531	1.01422e+07	8.79275e+06	2.06274e+07	13726164	1.32233e+07	1.4038e+07	1.13279e+07	1.11894e+07	1.14218e+07	1.1283e+07	9.76887e+06	1.18031e+07	1.13701e+07	1.12465e+07	1.21591e+07	1.58555e+07	1.52283e+07	1.73397e+07	5.59391e+06	5.14238e+06	6.05985e+06	13076218	1.20193e+07	1.36592e+07	1.27497e+07	1.26464e+07	1.32504e+07	4744553	4.32495e+06	5.24806e+06	2.47689e+07	2.43039e+07	2.50926e+07	2.71988e+07	26484695	2.82714e+07	1.79037e+07	1.54966e+07	1.86312e+07	2.10896e+07	2.02075e+07	2.14282e+07	2.72047e+07
217000000	9.40071e+06	8.82781e+06	9.91638e+06	1.0071e+07	9.8733e+06	1.0345e+07	10145205	8.79456e+06	2.06684e+07	1.37306e+07	13227048	1.40434e+07	1.13306e+07	1.11917e+07	1.14245e+07	1.12861e+07	9.77022e+06	1.18067e+07	11373149	1.12494e+07	1.21653e+07	15862351	1.52341e+07	1.73522e+07	5.59474e+06	5142906	6.06105e+06	1.30806e+07	1.20223e+07	1.36651e+07	1.27538e+07	1.26503e+07	1.32553e+07	4.74521e+06	4325417	5249060	2.47846e+07	2.43177e+07	2.51094e+07	2.7219e+07	2.6503e+07	2.82983e+07	17911830	1.55019e+07	1.86408e+07	2.1101e+07	2.0218e+07	2.14406e+07	2.72243e+07
218000000	9.4029e+06	8.82943e+06	9.91933e+06	10073366	9.87549e+06	1.03475e+07	1.01482e+07	8.79635e+06	20709300	1.3735e+07	1.32308e+07	1.40488e+07	11333314	1.1194e+07	1.14272e+07	1.12892e+07	9.77156e+06	1.18103e+07	1.13762e+07	1.12523e+07	1.21714e+07	1.58691e+07	1.52399e+07	1.73647e+07	5.59557e+06	5.14342e+06	6.06225e+06	1.30848e+07	1.20252e+07	1.36709e+07	1.27578e+07	1.26542e+07	1.32601e+07	4.74585e+06	4.32588e+06	5.25005e+06	2.48001e+07	2.43314e+07	2.5126e+07	2.72392e+07	2.65212e+07	2.8325e+07	1.79199e+07	1.55072e+07	1.86503e+07	2.11123e+07	2.02284e+07	2.14529e+07	2.72437e+07
219000000	9.40508e+06	8.83104e+06	9.92226e+06	10075674	9.87766e+06	1.035e+07	1.01511e+07	8.79812e+06	2.075e+07	1.37394e+07	13234459	1.40542e+07	11335981	1.11962e+07	1.14299e+07	1.12923e+07	9.77289e+06	1.18138e+07	1.13792e+07	1.12551e+07	1.21775e+07	1.58758e+07	15245677	1.73771e+07	5.59639e+06	5.14394e+06	6.06343e+06	1.30891e+07	1.20281e+07	1.36766e+07	1.27619e+07	1.26581e+07	1.32649e+07	4.7465e+06	4.32634e+06	5.25103e+06	2.48155e+07	2.4345e+07	25142556	2.72591e+07	2.65392e+07	2.83515e+07	1.79278e+07	1.55123e+07	1.86597e+07	2.11234e+07	2.02387e+07	2.14651e+07	2.7263e+07
220000000	9.40724e+06	8.83264e+06	9.92517e+06	1.0078e+07	9.87981e+06	1.03524e+07	1.01541e+07	8.79988e+06	2.07906e+07	13743734	1.32381e+07	1.40595e+07	11338625	11198428	1.14326e+07	1.12954e+07	9774202	1.18173e+07	1.13822e+07	11257951	1.21836e+07	1.58825e+07	1.52514e+07	1.73894e+07	5.5972e+06	5.14445e+06	6.06461e+06	1.30933e+07	1.20309e+07	13682338	12765863	1.26619e+07	1.32697e+07	4747134	4.32679e+06	5.252e+06	2.48308e+07	2.43585e+07	2.51589e+07	2.72789e+07	2.65572e+07	2.83779e+07	1.79357e+07	1.55175e+07	1.8669e+07	2.11345e+07	2.0249e+07	2.14772e+07	2.72821e+07
221000000	9.40938e+06	8.83422e+06	9.92805e+06	1.00802e+07	9.88194e+06	1.03548e+07	1.0157e+07	8.80162e+06	2.0831e+07	1.3748e+07	1.32417e+07	14064750	1.13412e+07	1.12006e+07	1.14353e+07	1.12984e+07	9.7755e+06	1.18208e+07	1.13852e+07	1.12607e+07	1.21896e+07	1.58891e+07	1.5257e+07	1.74016e+07	5.598e+06	5.14495e+06	6.06577e+06	1.30975e+07	1.20337e+07	1.3688e+07	1.27698e+07	1.26657e+07	1.32744e+07	4.74777e+06	4.32724e+06	5.25297e+06	2.4846e+07	2.43719e+07	2.51752e+07	2.72986e+07	2.65749e+07	2.84041e+07	1.79436e+07	1.55226e+07	1.86782e+07	2.11455e+07	2.02591e+07	2.14892e+07	2.73011e+07
222000000	9.4115e+06	8.83579e+06	9.93091e+06	1.00825e+07	9.88406e+06	10357218	1.01599e+07	8803349	2.08713e+07	1.37523e+07	1.32453e+07	1.407e+07	1.13438e+07	1.12028e+07	1.14379e+07	1.13014e+07	9.77679e+06	1.18243e+07	1.13882e+07	1.12635e+07	1.21956e+07	1.58957e+07	15262634	1.74138e+07	5.5988e+06	5.14545e+06	6.06693e+06	13101682	12036537	13693622	1.27737e+07	1.26695e+07	1.32791e+07	4.74839e+06	4327684	5.25392e+06	2.4861e+07	2.43851e+07	2.51914e+07	2.73182e+07	2.65926e+07	2.84302e+07	1.79514e+07	1.55277e+07	18687434	2.11565e+07	20269192	2.15011e+07	2.732e+07
223000000	9.4136e+06	8837340	9.93375e+06	1.00847e+07	9.88615e+06	1.03596e+07	1.01627e+07	8805062	2.09114e+07	1.37565e+07	1.32489e+07	1.40752e+07	1.13464e+07	1.1205e+07	11440494	1.13044e+07	9.77807e+06	1.18277e+07	1.13911e+07	11266259	12201591	1.59022e+07	1.52682e+07	17425865	5.59959e+06	5.14595e+06	6.06807e+06	1.31058e+07	1.20393e+07	1.36992e+07	1.27776e+07	1.26732e+07	1.32837e+07	4.74901e+06	4.32813e+06	5.25487e+06	2.4876e+07	2.43983e+07	2.52074e+07	2.73376e+07	2.66101e+07	2.84561e+07	1.79591e+07	1.55327e+07	1.86965e+07	2.11673e+07	20279186	2.15129e+07	2.73387e+07
224000000	9.41569e+06	8.83888e+06	9.93656e+06	1.00869e+07	9.88823e+06	1.03619e+07	1.01656e+07	8.80676e+06	20951427	1.37607e+07	1.32524e+07	1.40803e+07	1.1349e+07	1.12071e+07	1.14431e+07	11307341	9.77933e+06	1.18311e+07	1.1394e+07	1.1269e+07	1.22075e+07	1.59086e+07	1.52737e+07	1.74379e+07	5.60037e+06	5.14644e+06	6.06921e+06	1.31099e+07	12042077	13704735	1.27815e+07	1.26769e+07	1.32883e+07	4749626	4.32856e+06	5.25581e+06	2.48908e+07	2.44114e+07	2.52233e+07	2.73568e+07	2.66275e+07	2.84819e+07	1.79667e+07	15537684	1.87056e+07	2.1178e+07	2.02891e+07	2.15246e+07	2.73573e+07
225000000	9.41775e+06	8840407	9.93935e+06	1.00891e+07	9.8903e+06	1.03643e+07	1.01684e+07	8.80844e+06	2.09913e+07	1.37649e+07	1.3256e+07	14085459	1.13515e+07	1.12093e+07	1.14456e+07	11310275	9.78058e+06	1.18345e+07	1.13969e+07	1.12717e+07	1.22134e+07	1.5915e+07	1.52792e+07	1.74498e+07	5.60114e+06	5.14692e+06	6.07034e+06	1.31139e+07	1.20448e+07	1.37102e+07	1.27853e+07	1.26806e+07	1.32929e+07	4.75024e+06	4.329e+06	5.25674e+06	2.49055e+07	2.44243e+07	25239103	2.73759e+07	2.66447e+07	2.85075e+07	1.79743e+07	1.55426e+07	1.87146e+07	2.11887e+07	2.02989e+07	2.15363e+07	2.73758e+07
226000000	9.41981e+06	8.84192e+06	9.94212e+06	1.00913e+07	9.89234e+06	1.03666e+07	1.01712e+07	8.81011e+06	2.10309e+07	1.3769e+07	1.32594e+07	1.40905e+07	1.1354e+07	1.12114e+07	1.14482e+07	1.13132e+07	9.78182e+06	1.18379e+07	1.13998e+07	1.12744e+07	1.22193e+07	1.59214e+07	1.52846e+07	1.74617e+07	5.60191e+06	5.14741e+06	6.07145e+06	1.3118e+07	1.20475e+07	13715681	1.27891e+07	1.26843e+07	1.32974e+07	4.75084e+06	4.32943e+06	5.25767e+06	2.49201e+07	2.44372e+07	2.52548e+07	2.73949e+07	2.66618e+07	2.8533e+07	1.79819e+07	1.55475e+07	18723465	2.11993e+07	2.03087e+07	2.15478e+07	2.73941e+07
227000000	9421839	8.84342e+06	9.94487e+06	1.00934e+07	9.89437e+06	1.03689e+07	1.01739e+07	8.81177e+06	2.10705e+07	1.37731e+07	1.32629e+07	1.40956e+07	1.13565e+07	11213448	1.14507e+07	1.13161e+07	9.78305e+06	1.18412e+07	1.14026e+07	1.1277e+07	1.22251e+07	1.59277e+07	1.529e+07	1.74735e+07	5602676	5.14788e+06	6072559	1.3122e+07	1.20502e+07	1.37211e+07	1.27929e+07	1.26879e+07	1.33019e+07	4.75144e+06	4.32985e+06	5.25859e+06	2.49346e+07	2.44499e+07	2.52703e+07	2.74137e+07	2.66788e+07	2.85583e+07	1.79894e+07	1.55524e+07	18732299	21209785	2.03184e+07	2.15593e+07	2.74123e+07
228000000	9423856	8.84491e+06	9.94759e+06	1.00956e+07	9.89638e+06	1.03712e+07	1.01767e+07	8.81341e+06	2.11099e+07	1.37772e+07	1.32663e+07	1.41006e+07	1.1359e+07	1.12155e+07	1.14532e+07	1.13189e+07	9.78427e+06	1.18445e+07	1.14054e+07	1.12796e+07	12230908	1.5934e+07	1.52953e+07	1.74852e+07	5.60343e+06	5.14836e+06	6073657	1.31259e+07	1.20529e+07	1.37265e+07	1.27966e+07	1.26915e+07	1.33064e+07	4.75203e+06	4.33028e+06	5.25949e+06	2.4949e+07	2.44626e+07	2.52858e+07	2.74324e+07	26695709	2.85835e+07	1.79968e+07	15557228	1.87411e+07	2.12202e+07	2.0328e+07	2.15707e+07	2.74303e+07
229000000	9.42586e+06	8.84639e+06	9950298	1.00977e+07	9.89837e+06	1.03734e+07	1.01794e+07	8.81504e+06	2.11491e+07	1.37812e+07	1.32697e+07	1.41056e+07	1.13614e+07	1.12176e+07	1.14557e+07	1.13218e+07	9.78547e+06	1.18478e+07	11408214	1.12823e+07	1.22367e+07	1.59402e+07	1.53006e+07	1.74969e+07	5.60418e+06	5.14883e+06	6074746	1.31298e+07	1.20555e+07	1.37318e+07	1.28003e+07	1.2695e+07	1.33108e+07	4.75262e+06	4.3307e+06	5.2604e+06	2.49633e+07	2.44751e+07	2.53011e+07	2.7451e+07	2.67125e+07	2.86085e+07	1.80041e+07	15562017	1.87498e+07	2.12305e+07	2.03375e+07	2.1582e+07	2.74482e+07
230000000	9.42784e+06	8.84785e+06	9.95298e+06	1.00998e+07	9900346	1.03757e+07	1.01821e+07	8.81665e+06	2.11882e+07	1.37852e+07	1.32731e+07	1.41105e+07	1.13639e+07	1.12196e+07	1.14581e+07	1.13246e+07	9.78667e+06	1.1851e+07	1.1411e+07	1.12848e+07	12242401	1.59463e+07	1.53059e+07	1.75085e+07	5604926	5.14929e+06	6.07583e+06	1.31337e+07	1.20582e+07	1.37371e+07	1.2804e+07	1.26985e+07	1.33152e+07	4.75321e+06	4.33111e+06	5.26129e+06	2.49775e+07	24487575	2.53164e+07	2.74695e+07	2.67291e+07	2.86333e+07	1.80114e+07	1.55668e+07	1.87584e+07	2.12408e+07	2.0347e+07	2.15932e+07	2.7466e+07
231000000	9.42981e+06	8.8493e+06	9955642	1.01019e+07	9.90231e+06	1.03779e+07	1.01848e+07	8818255	2.12272e+07	1.37892e+07	1.32764e+07	1.41154e+07	1.13663e+07	1.12216e+07	11460575	1.13274e+07	9.78785e+06	1.18542e+07	1.14137e+07	1.12874e+07	1.22481e+07	1.59524e+07	1.53111e+07	1.752e+07	5.60566e+06	5.14976e+06	6.0769e+06	1.31376e+07	12060762	1.37423e+07	1.28076e+07	1.2702e+07	1.33196e+07	4.75379e+06	4.33152e+06	5.26218e+06	2.49916e+07	2.44999e+07	25331473	2.74878e+07	26745597	2.86581e+07	1.80187e+07	1.55715e+07	1.8767e+07	2.1251e+07	2.03564e+07	21604341	2.74837e+07
232000000	9.43176e+06	8850738	9.95828e+06	1.0104e+07	9.90425e+06	1.03801e+07	1.01874e+07	8.81984e+06	2.1266e+07	1.37931e+07	1.32797e+07	1.41202e+07	1.13687e+07	1.12236e+07	1.1463e+07	1.13301e+07	9.78902e+06	1.18574e+07	1.14165e+07	1.129e+07	1.22538e+07	1.59585e+07	1.53163e+07	1.75314e+07	5.60639e+06	5.15021e+06	6.07796e+06	1.31414e+07	1.20633e+07	1.37476e+07	1.28113e+07	1.27055e+07	13323894	4.75436e+06	4.33193e+06	5.26306e+06	2.50055e+07	2.45122e+07	25346481	2.7506e+07	2.6762e+07	2.86827e+07	18025854	1.55762e+07	1.87755e+07	2.12611e+07	2.03657e+07	2.16154e+07	2.75012e+07
233000000	9.4337e+06	8.85216e+06	9.9609e+06	1.0106e+07	9.90618e+06	1.03823e+07	1.01901e+07	8.82142e+06	2.13047e+07	1.3797e+07	1.3283e+07	1.41251e+07	11371029	1.12256e+07	1.14654e+07	1.13329e+07	9.79019e+06	1.18606e+07	11419152	1.12925e+07	12259398	1.59645e+07	1.53214e+07	17542829	5.60712e+06	5.15067e+06	6.07901e+06	1.31452e+07	12065908	1.37527e+07	1.28149e+07	1.2709e+07	1.33282e+07	4.75493e+06	4.33234e+06	5.26393e+06	2.50194e+07	2.45244e+07	2.53614e+07	2.7524e+07	2.67783e+07	2.87071e+07	1.8033e+07	1.55808e+07	18783904	2.12711e+07	2.0375e+07	2.16264e+07	2.75187e+07
234000000	9.43562e+06	8.85358e+06	9.9635e+06	1.0108e+07	9.90809e+06	1.03844e+07	10192694	8.82298e+06	2.13432e+07	1.38009e+07	1.32863e+07	1.41298e+07	1.13734e+07	1.12275e+07	1.14678e+07	1.13356e+07	9.79134e+06	1.18637e+07	1.14218e+07	1.1295e+07	1.2265e+07	1.59705e+07	1.53265e+07	1.75542e+07	5.60784e+06	5.15112e+06	6.08006e+06	1.3149e+07	1.20685e+07	1.37579e+07	1.28184e+07	1.27124e+07	1.33324e+07	4755496	4.33274e+06	5.26479e+06	2.50332e+07	2.45364e+07	2.53762e+07	2.75419e+07	2.67944e+07	2.87314e+07	1.80401e+07	1.55854e+07	1.87923e+07	2.12811e+07	2.03841e+07	2.16373e+07	2.7536e+07
235000000	9.43752e+06	8.85498e+06	9.96608e+06	1.01101e+07	9.90999e+06	1.03866e+07	10195289	8.82453e+06	2.13816e+07	13804711	1.32895e+07	1.41346e+07	1.13757e+07	1.12295e+07	1.14701e+07	1.13383e+07	9.79248e+06	1.18669e+07	1.14245e+07	1.12975e+07	1.22706e+07	1.59764e+07	1.53315e+07	1.75654e+07	5.60855e+06	5.15156e+06	6081096	1.31528e+07	1.2071e+07	1.3763e+07	1.28219e+07	1.27158e+07	13336667	4.75606e+06	4.33314e+06	5.26565e+06	2.50468e+07	2.45484e+07	2.53909e+07	27559750	2.68105e+07	2.87556e+07	1.80471e+07	1.559e+07	1.88006e+07	2.1291e+07	2.03933e+07	2.16481e+07	2.75531e+07
236000000	9.43941e+06	8.85637e+06	9.96864e+06	1.01121e+07	9.91187e+06	1.03887e+07	1.01979e+07	8.82607e+06	2.14199e+07	13808522	1.32927e+07	1.41393e+07	1.1378e+07	1.12314e+07	1.14725e+07	1.1341e+07	9.79361e+06	11869945	1.14271e+07	1.13e+07	1.22761e+07	1.59822e+07	1.53366e+07	1.75766e+07	5.60926e+06	5.15201e+06	6.08212e+06	1.31565e+07	1.20735e+07	13768034	1.28254e+07	1.27191e+07	1.33409e+07	4.75661e+06	4.33353e+06	5.2665e+06	2.50604e+07	2.45603e+07	2.54055e+07	2.75774e+07	2.68264e+07	2.87797e+07	1.80541e+07	1.55945e+07	1.88088e+07	2.13008e+07	2.04023e+07	2.16588e+07	2.75702e+07
237000000	9.44129e+06	8857755	9.97118e+06	1.0114e+07	9.91374e+06	1.03908e+07	1.02004e+07	8.82759e+06	2.1458e+07	1.38123e+07	1.32959e+07	1.4144e+07	1.13803e+07	1.12333e+07	1.14748e+07	1.13437e+07	9.79473e+06	1.1873e+07	1.14297e+07	1.13024e+07	1.22816e+07	1.59881e+07	1.53415e+07	1.75877e+07	5609962	5.15245e+06	6.08315e+06	13160154	1.2076e+07	1.37731e+07	1.28289e+07	1.27225e+07	1.3345e+07	4.75716e+06	4.33393e+06	5.26735e+06	2.50739e+07	24572136	2.54199e+07	2.7595e+07	2.68422e+07	2.88036e+07	1.8061e+07	1.5599e+07	1.8817e+07	2.13105e+07	2.04113e+07	2.16695e+07	2.75871e+07
238000000	9.44315e+06	8.85912e+06	9.9737e+06	1.0116e+07	9.91559e+06	1.03929e+07	1.0203e+07	8.8291e+06	2.1496e+07	1.38161e+07	13299053	1.41487e+07	11382593	11235214	1.14771e+07	1.13463e+07	9.79584e+06	1.18761e+07	1.14323e+07	1.13048e+07	1.22871e+07	1.59939e+07	1.53465e+07	1.75988e+07	5610658	5.15288e+06	6.08416e+06	1.31638e+07	1.20784e+07	1.37781e+07	1.28324e+07	1.27258e+07	1.33491e+07	4.75771e+06	4.33431e+06	5.26819e+06	2.50873e+07	2.45839e+07	2.54343e+07	2.76124e+07	26857892	28827326	1.80678e+07	1.56035e+07	1.88252e+07	2.13202e+07	20420179	21680031	2.76039e+07
239000000	9.44499e+06	8.86048e+06	9.97621e+06	1.0118e+07	9.91743e+06	1.0395e+07	1.02055e+07	8830602	2.15338e+07	1.38198e+07	1.33022e+07	1.41533e+07	1.13849e+07	1.12371e+07	11479378	1.13489e+07	9.79694e+06	1.18791e+07	1.14349e+07	1.13072e+07	1.22925e+07	1.59996e+07	1.53514e+07	1.76098e+07	5.61135e+06	5.15331e+06	6.08516e+06	1.31674e+07	12080863	1.3783e+07	1.28358e+07	1.27291e+07	1.33532e+07	4.75825e+06	4.3347e+06	5.26902e+06	2.51006e+07	2.45955e+07	2.54486e+07	2.76298e+07	2.68735e+07	28850963	1.80746e+07	1.56079e+07	1.88332e+07	2.13298e+07	2.0429e+07	2.16905e+07	2.76206e+07
240000000	9.44682e+06	8.86183e+06	9.97869e+06	1.01199e+07	9919248	1.03971e+07	1.0208e+07	8.83209e+06	21571512	1.38235e+07	1.33053e+07	1.41579e+07	1.13871e+07	1.1239e+07	1.14816e+07	1.13515e+07	9.79803e+06	1.18821e+07	1.14375e+07	1.13096e+07	1.2298e+07	1.60053e+07	1.53562e+07	1.76207e+07	5.61203e+06	5.15374e+06	6.08616e+06	1.3171e+07	1.20833e+07	1.37879e+07	1.28392e+07	1.27323e+07	1.33573e+07	4.75879e+06	4335082	5.26984e+06	2.51138e+07	24607025	2.54628e+07	2.7647e+07	2.6889e+07	2.88745e+07	18081399	15612291	1.88412e+07	2.13393e+07	2.04378e+07	2.1701e+07	2.76372e+07
241000000	9.44864e+06	8.86317e+06	9.98115e+06	1.01218e+07	9.92106e+06	1.03991e+07	1.02104e+07	8833566	2.16091e+07	1.38271e+07	1.33084e+07	1.41624e+07	1.13893e+07	1.12408e+07	1.14839e+07	1.13541e+07	9.79911e+06	1.1885e+07	1.144e+07	1.1312e+07	1.23034e+07	1.60109e+07	1.53611e+07	1.76316e+07	5.61271e+06	5.15417e+06	6.08715e+06	1.31745e+07	1.20857e+07	1.37928e+07	1.28426e+07	1.27356e+07	1.33614e+07	4.75932e+06	4.33546e+06	5.27066e+06	2.51269e+07	2.46185e+07	2.54769e+07	2.7664e+07	2.69043e+07	2.88978e+07	1.80881e+07	1.56167e+07	1.88492e+07	2.13488e+07	2.04465e+07	2.17113e+07	27653665
242000000	9.45044e+06	8.86449e+06	9.9836e+06	1.01237e+07	9.92285e+06	1.04012e+07	1.02129e+07	8.83503e+06	2.16465e+07	1.38308e+07	1.33114e+07	1.41669e+07	1.13915e+07	1.12426e+07	1.14861e+07	1.13567e+07	9.80018e+06	1.1888e+07	1.14425e+07	1.13144e+07	1.23087e+07	16016558	1.53659e+07	1.76424e+07	5.61339e+06	5.15459e+06	6.08813e+06	1.31781e+07	1.20881e+07	1.37977e+07	1.28459e+07	1.27388e+07	1.33654e+07	4.75985e+06	4.33584e+06	5.27147e+06	2.514e+07	2.46299e+07	2.54908e+07	2.7681e+07	2.69196e+07	2.89211e+07	1.80948e+07	1.5621e+07	1.88571e+07	2.13582e+07	2.04552e+07	2.17216e+07	2.767e+07
243000000	9.45223e+06	8.86581e+06	9.98603e+06	1.01256e+07	9.92463e+06	1.04032e+07	1.02153e+07	8.83648e+06	2.16838e+07	13834388	1.33145e+07	1.41714e+07	1.13937e+07	1.12444e+07	1.14883e+07	1.13592e+07	9.80124e+06	1.18909e+07	1.1445e+07	1.13168e+07	1.23141e+07	1.60221e+07	1.53706e+07	1.76532e+07	5.61406e+06	5.155e+06	6.0891e+06	13181567	1.20904e+07	1.38025e+07	1.28492e+07	1.2742e+07	1.33693e+07	4.76038e+06	4.33621e+06	5.27228e+06	2.51529e+07	24641142	2.55047e+07	2.76979e+07	2.69348e+07	2.89442e+07	1.81014e+07	15625280	1.88649e+07	2.13675e+07	2.04637e+07	2.17318e+07	2.76863e+07
244000000	9.454e+06	8867110	9.98844e+06	1.01275e+07	9.92639e+06	1.04052e+07	1.02178e+07	8.83792e+06	2.1721e+07	1.3838e+07	1.33175e+07	14175872	1.13959e+07	1.12462e+07	1.14905e+07	1.13617e+07	9.8023e+06	1.18938e+07	1.14475e+07	1.13191e+07	1.23194e+07	1.60277e+07	1.53753e+07	1.76639e+07	5.61472e+06	5.15542e+06	6.09007e+06	13185040	1.20928e+07	1.38073e+07	1.28525e+07	1.27451e+07	1.33733e+07	4.7609e+06	4.33658e+06	5.27308e+06	2.51657e+07	2.46523e+07	2.55185e+07	27714602	2.69498e+07	2.89672e+07	1.81079e+07	1.56295e+07	1.88727e+07	2.13767e+07	20472269	2.17419e+07	2.77024e+07
245000000	9.45576e+06	8868404	9.99083e+06	1.01294e+07	9.92815e+06	1.04072e+07	1.02202e+07	8.83935e+06	2.1758e+07	1.38415e+07	1.33205e+07	1.41803e+07	1.1398e+07	1.1248e+07	1.14927e+07	1.13642e+07	9.80334e+06	1.18967e+07	1.145e+07	1.13214e+07	1.23246e+07	1.60331e+07	1.538e+07	1.76745e+07	5.61538e+06	5.15583e+06	6.09102e+06	1.31885e+07	1.20951e+07	1.3812e+07	1.28558e+07	1.27483e+07	1.33772e+07	4.76142e+06	4.33695e+06	5.27387e+06	25178504	2.46635e+07	2.55322e+07	27731230	2.69648e+07	2.89901e+07	1.81144e+07	1.56338e+07	1.88804e+07	2.13859e+07	2.04807e+07	2.1752e+07	2.77184e+07
246000000	9.45751e+06	8.86969e+06	9.9932e+06	1.01312e+07	9.92988e+06	1.04092e+07	1.02225e+07	8.84077e+06	2.1795e+07	1.38451e+07	1.33235e+07	1.41847e+07	1.14002e+07	1.12498e+07	1.14949e+07	1.13667e+07	9.80438e+06	1.18996e+07	1.14524e+07	1.13237e+07	12329877	1.60386e+07	1.53847e+07	1.76851e+07	5.61603e+06	5.15624e+06	6091975	1.31919e+07	1.20974e+07	1.38167e+07	1.2859e+07	1.27514e+07	1.33811e+07	4.76193e+06	4337313	5.27466e+06	2.51912e+07	2.46745e+07	2.55458e+07	2.77477e+07	2.69796e+07	2.90128e+07	1.81209e+07	1.5638e+07	1.88881e+07	2.1395e+07	2.04891e+07	2.1762e+07	2.77343e+07
247000000	9.45924e+06	8.87096e+06	9.99556e+06	1.01331e+07	9.93161e+06	1.04111e+07	1.02249e+07	8.84218e+06	2.18317e+07	1.38486e+07	1.33264e+07	1.41891e+07	1.14023e+07	1.12515e+07	1.1497e+07	1.13691e+07	9.8054e+06	1.19024e+07	1.14548e+07	1.1326e+07	1.23351e+07	1.6044e+07	1.53893e+07	1.76956e+07	5.61668e+06	5.15664e+06	6.09292e+06	1.31953e+07	1.20997e+07	1.38214e+07	1.28623e+07	1.27545e+07	1.3385e+07	4.76244e+06	4.33767e+06	5.27544e+06	2.52037e+07	2.46855e+07	25559331	2.77642e+07	2.69944e+07	29035423	1.81273e+07	1.56421e+07	1.88957e+07	2.14041e+07	2.04975e+07	21771926	2.77501e+07
248000000	9.46096e+06	8.87223e+06	9.9979e+06	1.01349e+07	9.93332e+06	1.04131e+07	1.02273e+07	8.84358e+06	2.18684e+07	1.3852e+07	1.33293e+07	1.41934e+07	1.14044e+07	1.12533e+07	1.14992e+07	1.13716e+07	9.80642e+06	1.19052e+07	1.14572e+07	11328281	1.23403e+07	1.60494e+07	1.53938e+07	1.77061e+07	5.61732e+06	5.15704e+06	6.09385e+06	1.31987e+07	1.2102e+07	1.38261e+07	1.28655e+07	12757530	1.33888e+07	4.76294e+06	4.33803e+06	5.27621e+06	2.52162e+07	2.46964e+07	2.55728e+07	2.77805e+07	27009014	2.90579e+07	18133695	15646289	1.89032e+07	21413093	2.05058e+07	2.17818e+07	2.77658e+07
249000000	9.46267e+06	8.87348e+06	1.00002e+07	1.01367e+07	9935018	1.0415e+07	10229580	8.84497e+06	2.19049e+07	1.38555e+07	1.33322e+07	1.41977e+07	1.14065e+07	1.1255e+07	1.15013e+07	11374015	9.80743e+06	1.1908e+07	1.14596e+07	1.13305e+07	1.23455e+07	16054711	1.53984e+07	17716470	5.61796e+06	5.15744e+06	6.09478e+06	1.3202e+07	1.21043e+07	13830687	1.28686e+07	1.27606e+07	1.33926e+07	4.76345e+06	4.33839e+06	5.27698e+06	2.52286e+07	2.47072e+07	2.55861e+07	2.77966e+07	2.70236e+07	29080292	1.814e+07	15650398	1.89108e+07	2.1422e+07	2.0514e+07	2.17916e+07	2.77814e+07
250000000	9.46437e+06	8.87472e+06	1.00025e+07	1.01385e+07	9.9367e+06	1.04169e+07	1.02319e+07	8.84634e+06	2.19413e+07	1.38589e+07	1.33351e+07	1.4202e+07	1.14085e+07	1.12567e+07	1.15034e+07	11376420	9808426	1.19108e+07	1.1462e+07	11332765	1.23506e+07	1.606e+07	1.54029e+07	1.77268e+07	5.61859e+06	5.15784e+06	6.09571e+06	13205339	1.21065e+07	1.38353e+07	1.28718e+07	1.27636e+07	1.33964e+07	4.76394e+06	4.33874e+06	5.27775e+06	2.5241e+07	2.47179e+07	25599318	27812723	2.7038e+07	2.91025e+07	1.81463e+07	1.56545e+07	1.89182e+07	2.14309e+07	2.05221e+07	2.18013e+07	2.77969e+07
251000000	9.46605e+06	8.87596e+06	1.00048e+07	10140268	9.93838e+06	10418788	1.02342e+07	8847706	2.19776e+07	1.38623e+07	1.3338e+07	1.42062e+07	1.14106e+07	1.12584e+07	1.15054e+07	1.13788e+07	9.80942e+06	1.19135e+07	1.14643e+07	1.1335e+07	1.23557e+07	1.60653e+07	1.54074e+07	1.77371e+07	5.61922e+06	5.15823e+06	6.09662e+06	1.32086e+07	1.21088e+07	1.38398e+07	1.28749e+07	1.27666e+07	1.34001e+07	4.76444e+06	4.33909e+06	5.2785e+06	2.52532e+07	2.47285e+07	2.56125e+07	2.78287e+07	2.70524e+07	2.91247e+07	1.81525e+07	15658526	1.89256e+07	2.14397e+07	2.05302e+07	2.18109e+07	2.78123e+07
252000000	9.46772e+06	8.87718e+06	1.00071e+07	1.0142e+07	9.94004e+06	1.04207e+07	10236466	8.84906e+06	2.20137e+07	1.38657e+07	1.33408e+07	1.42104e+07	1.14126e+07	1.12601e+07	1.15075e+07	1.13812e+07	9.8104e+06	1.19163e+07	11466653	1.13372e+07	12360781	1.60705e+07	1.54118e+07	1.77473e+07	5.61984e+06	5.15862e+06	6.09753e+06	1.32119e+07	1.2111e+07	1.38444e+07	12878010	1.27696e+07	1.34038e+07	4764925	4.33944e+06	5.27926e+06	2.52653e+07	2.47391e+07	2.56255e+07	2.78446e+07	2.70666e+07	2.91467e+07	1.81587e+07	1.56625e+07	1.89329e+07	2.14484e+07	2.05383e+07	2.18205e+07	2.78276e+07
253000000	9.46937e+06	8.8784e+06	10009343	1.01438e+07	9.94168e+06	1.04225e+07	1.02387e+07	8.85041e+06	2.20497e+07	13869039	1.33436e+07	1.42146e+07	1.14147e+07	1.12617e+07	11509556	1.13835e+07	9.81137e+06	1.1919e+07	1.1469e+07	1.13394e+07	1.23658e+07	1.60757e+07	1.54162e+07	1.77575e+07	5.62046e+06	5.159e+06	6.09843e+06	1.32152e+07	1.21132e+07	1.38488e+07	12881090	1.27725e+07	1.34075e+07	4.76541e+06	4.33979e+06	5.28e+06	2.52774e+07	24749605	2.56385e+07	2.78603e+07	2.70808e+07	2.91686e+07	1.81649e+07	1.56665e+07	18940242	2.14571e+07	2.05463e+07	2.18301e+07	2.78428e+07
254000000	9.47102e+06	8.87961e+06	1.00116e+07	1.01455e+07	9.94332e+06	1.04244e+07	1.0241e+07	8.85174e+06	2.20856e+07	13872365	1.33464e+07	1.42188e+07	1.14167e+07	1.12634e+07	1.15116e+07	11385861	9.81234e+06	1.19217e+07	1.14713e+07	1.13415e+07	1.23709e+07	1.60808e+07	1.54206e+07	17767638	5.62107e+06	5.15938e+06	6.09933e+06	1.32184e+07	12115349	1.38533e+07	1.28841e+07	1.27755e+07	1.34112e+07	4.76589e+06	4.34013e+06	5.28074e+06	2.52894e+07	2.476e+07	2.56514e+07	2.7876e+07	2.70948e+07	2.91904e+07	1.8171e+07	1.56705e+07	1.89475e+07	2.14657e+07	2.05542e+07	2.18395e+07	2.78579e+07
255000000	9.47265e+06	8.8808e+06	10013806	1.01473e+07	9.94494e+06	1.04262e+07	1.02432e+07	8.85306e+06	2.21213e+07	1.38757e+07	1.33492e+07	1.42229e+07	1.14187e+07	1.1265e+07	1.15136e+07	1.13882e+07	9.8133e+06	1.19244e+07	11473545	1.13437e+07	1.23759e+07	1.60859e+07	15424972	1.77777e+07	5.62168e+06	5.15976e+06	6.10021e+06	1.32216e+07	1.21175e+07	1.38577e+07	1.28872e+07	1.27784e+07	1.34148e+07	4.76637e+06	4.34047e+06	5.28148e+06	2.53013e+07	2.47704e+07	2.56642e+07	2.78916e+07	2.71088e+07	2.9212e+07	1.8177e+07	1.56744e+07	1.89547e+07	2.14743e+07	2.05621e+07	2.18489e+07	2.78728e+07
256000000	9474270	8.88199e+06	1.0016e+07	1.0149e+07	9.94655e+06	10428061	10245413	8.85438e+06	2.2157e+07	1.38789e+07	1.33519e+07	14227019	1.14206e+07	1.12667e+07	1.15156e+07	1.13905e+07	9.81425e+06	1.1927e+07	1.14758e+07	1.13458e+07	1.23809e+07	1.6091e+07	1.54293e+07	1.77877e+07	5.62229e+06	5.16014e+06	6.10109e+06	1.32248e+07	1.21197e+07	1.38622e+07	1.28902e+07	1.27813e+07	1.34185e+07	4.76685e+06	4.3408e+06	5.28221e+06	2.53131e+07	2.47807e+07	2.56769e+07	2.7907e+07	2.71227e+07	2.92336e+07	18183019	15678336	1.89618e+07	2.14828e+07	2.05699e+07	2.18582e+07	27887634
257000000	9.47588e+06	8.88317e+06	1.00182e+07	1.01507e+07	9.94815e+06	1.04299e+07	1.02476e+07	8.85568e+06	22192485	1.38822e+07	1.33547e+07	1.42311e+07	11422609	1.12683e+07	1.15176e+07	1.13928e+07	9.81519e+06	1.19297e+07	1.14781e+07	1.13479e+07	1.23858e+07	1.6096e+07	1.54336e+07	1.77977e+07	5.62289e+06	5.16051e+06	6.10197e+06	1.32279e+07	1.21218e+07	1.38665e+07	1.28932e+07	1.27841e+07	1.34221e+07	4767317	4.34114e+06	5.28293e+06	2.53249e+07	2.47909e+07	2.56895e+07	2.79224e+07	2.71365e+07	2.9255e+07	1.8189e+07	15682213	1.89689e+07	2.14912e+07	2.05777e+07	2.18675e+07	2.79022e+07
258000000	9.47747e+06	8.88434e+06	10020382	10152358	9.94973e+06	1.04317e+07	1.02498e+07	8.85698e+06	2.22279e+07	13885430	1.33574e+07	1.42351e+07	1.14246e+07	1.12699e+07	1.15196e+07	11395025	9.81613e+06	1.19323e+07	1.14803e+07	1.135e+07	1.23907e+07	1.6101e+07	15437837	1.78076e+07	5.62348e+06	5.16089e+06	6.10284e+06	1.3231e+07	12123909	1.38709e+07	1.28962e+07	1.2787e+07	1.34256e+07	4.76778e+06	4.34147e+06	5.28365e+06	2.53365e+07	2.48013e+07	2.57021e+07	2.79377e+07	2.71502e+07	29276369	1.81949e+07	1.56861e+07	1.8976e+07	2.14996e+07	2.05854e+07	2.18767e+07	2.79167e+07
259000000	9.47906e+06	8885501	1.00225e+07	1.0154e+07	9.95131e+06	10433461	1.0252e+07	8.85826e+06	2.22631e+07	1.38886e+07	1.33601e+07	1.42392e+07	1.14265e+07	1.12715e+07	1.15215e+07	1.13973e+07	9.81705e+06	1.19349e+07	1.14825e+07	1.13521e+07	1.23956e+07	1.6106e+07	1.54421e+07	1.78174e+07	5.62407e+06	5.16125e+06	6.1037e+06	1.32342e+07	1.2126e+07	1.38752e+07	1.28991e+07	12789804	1.34292e+07	4.76825e+06	4.3418e+06	5.28436e+06	2.53481e+07	2.48122e+07	2.57146e+07	2.79528e+07	2.71638e+07	2.92976e+07	1.82008e+07	1.56899e+07	1.8983e+07	2.15079e+07	2.05931e+07	2.18859e+07	27931053
260000000	9.48063e+06	8.88665e+06	1.00247e+07	10155698	9.95287e+06	1.04352e+07	1.02541e+07	8.85954e+06	2.22983e+07	1.38918e+07	1.33628e+07	1.42432e+07	1.14284e+07	1.1273e+07	1.15235e+07	1.13995e+07	9.81797e+06	1.19374e+07	11484699	1.13542e+07	1.24005e+07	1.61109e+07	1.54463e+07	17827246	5.62466e+06	5.16162e+06	6.10456e+06	1.32372e+07	1.21281e+07	1.38795e+07	1.2902e+07	1.27926e+07	1.34327e+07	4.76871e+06	4.34213e+06	5.28507e+06	2.53596e+07	24823018	25726960	2.79679e+07	2.71773e+07	2.93187e+07	1.82066e+07	1.56937e+07	1.89899e+07	2.15162e+07	2.06007e+07	2.18949e+07	2.79453e+07
261000000	9.48219e+06	8.8878e+06	1.00268e+07	1.01573e+07	9954423	1.0437e+07	1.02562e+07	8.8608e+06	2.23333e+07	1.3895e+07	1.33654e+07	1.42471e+07	1.14303e+07	11274608	1.15254e+07	1.14017e+07	9.81888e+06	1.194e+07	1.14869e+07	1.13563e+07	1.24054e+07	1.61158e+07	1.54504e+07	17836997	5.62524e+06	5.16198e+06	6105405	13240306	1.21302e+07	1.38837e+07	1.29049e+07	1.27954e+07	1.34362e+07	4.76917e+06	4.34245e+06	5.28577e+06	25371084	2.48337e+07	2.57393e+07	2.79829e+07	2.71907e+07	2.93397e+07	1.82124e+07	15697448	1.89968e+07	2.15244e+07	2.06082e+07	2.1904e+07	2.79595e+07
262000000	9483743	8.88893e+06	1.00289e+07	1.0159e+07	9.95596e+06	1.04387e+07	1.02584e+07	8.86206e+06	22368208	1.38981e+07	1.3368e+07	1.42511e+07	1.14322e+07	1.12762e+07	11527330	1.14039e+07	9819788	1.19425e+07	1.1489e+07	1.13583e+07	1.24102e+07	1.61207e+07	1.54546e+07	1.78467e+07	5.62582e+06	5.16234e+06	6.10625e+06	1.32433e+07	1.21322e+07	1.3888e+07	1.29078e+07	1.27982e+07	1.34396e+07	4.76962e+06	4.34277e+06	5.28647e+06	2.53824e+07	2.48444e+07	2.57515e+07	2.79977e+07	2.72041e+07	2.93606e+07	1.82182e+07	1.57012e+07	1.90037e+07	2.15326e+07	20615736	2.19129e+07	2.79736e+07
263000000	9485282	8.89006e+06	1.0031e+07	10160617	9.95749e+06	1.04405e+07	1.02605e+07	8.86331e+06	2.2403e+07	1.39012e+07	1.33707e+07	1.4255e+07	1.14341e+07	1.12777e+07	1.15292e+07	1.14061e+07	9820685	1.19451e+07	1.14912e+07	1.13603e+07	12415004	1.61255e+07	15458678	1.78563e+07	5.62639e+06	5.1627e+06	6.10709e+06	1.32464e+07	1.21343e+07	1.38922e+07	1.29107e+07	1.28009e+07	1.34431e+07	4.77007e+06	4.34309e+06	5.28716e+06	2.53937e+07	2.4855e+07	2.57636e+07	2.80125e+07	2.72173e+07	2.93814e+07	1.82239e+07	1.57049e+07	1.90105e+07	2.15407e+07	2.06232e+07	2.19218e+07	2.79876e+07
264000000	9.48681e+06	8.89118e+06	1.00331e+07	1.01622e+07	9.95901e+06	10442201	1.02625e+07	8.86455e+06	2.24377e+07	1.39043e+07	1.33733e+07	1.42589e+07	1.1436e+07	1.12792e+07	1.15311e+07	1.14083e+07	9.82157e+06	1.19476e+07	1.14933e+07	1.13623e+07	1.24198e+07	1.61303e+07	15462759	17865944	5.62696e+06	5.16305e+06	6.10792e+06	1.32494e+07	1.21363e+07	1.38963e+07	1.29135e+07	1.28036e+07	1.34465e+07	4.77052e+06	4.34341e+06	5287852	2.54049e+07	2.48655e+07	2.57757e+07	2.80272e+07	2.72305e+07	2.9402e+07	1.82296e+07	1.57086e+07	1.90172e+07	2.15487e+07	2.06306e+07	2.19307e+07	2.80016e+07
265000000	9.48833e+06	8.89229e+06	1.00352e+07	1.01638e+07	9.96052e+06	1.04439e+07	1.02646e+07	8.86578e+06	2.24722e+07	1.39074e+07	13375846	1.42628e+07	1.14378e+07	1.12807e+07	1.1533e+07	1.14104e+07	9.82246e+06	1.19501e+07	1.14955e+07	1.13643e+07	1.24245e+07	1.61351e+07	1.54668e+07	1.78755e+07	5.62753e+06	5.1634e+06	6108742	1.32524e+07	1.21383e+07	1.39005e+07	1.29164e+07	1.28064e+07	1.34499e+07	4.77096e+06	4.34373e+06	5.28853e+06	2.54161e+07	2.4876e+07	2.57877e+07	2.80418e+07	2.72436e+07	2.94226e+07	1.82353e+07	1.57123e+07	1.90239e+07	2.15567e+07	2.0638e+07	21939467	2.80154e+07
266000000	9489833	8893393	10037255	1.01654e+07	9.96201e+06	1.04456e+07	1.02667e+07	8.867e+06	2.25066e+07	1.39105e+07	1.33784e+07	1.42666e+07	1.14397e+07	1.12822e+07	1.15349e+07	1.14126e+07	9823333	1.19525e+07	1.14976e+07	1.13663e+07	1.24293e+07	1.61398e+07	1.54708e+07	1.7885e+07	5.62809e+06	5163753	6.10956e+06	1.32553e+07	1.21403e+07	1.39046e+07	1.29192e+07	1.2809e+07	1.34533e+07	4.7714e+06	4.34404e+06	5.28921e+06	2.54271e+07	2.48863e+07	2.57996e+07	2.80563e+07	2.72566e+07	2.94431e+07	1.82409e+07	1.57159e+07	1.90306e+07	2.15647e+07	2.06453e+07	2.19482e+07	2.80291e+07
267000000	9.49133e+06	8.89449e+06	10039299	1.0167e+07	9.9635e+06	1.04473e+07	10268724	8.86821e+06	2.25409e+07	1.39135e+07	1.3381e+07	1.42704e+07	1.14415e+07	11283728	1.15367e+07	1.14147e+07	9.8242e+06	1.1955e+07	1.14997e+07	1.13683e+07	1.2434e+07	1.61445e+07	1.54748e+07	17894441	5628644	5.1641e+06	6.11037e+06	1.32583e+07	1.21423e+07	1.39087e+07	1.2922e+07	1.28117e+07	1.34566e+07	4.77184e+06	4.34435e+06	5.28989e+06	2.54381e+07	2.48966e+07	2.58115e+07	2.80707e+07	2.72695e+07	2.94634e+07	1.82464e+07	1.57195e+07	1.90372e+07	2.15725e+07	2.06525e+07	21956872	2.80428e+07
268000000	9.49281e+06	8.89557e+06	1.00413e+07	1.01686e+07	9.96497e+06	1.0449e+07	1.02708e+07	8.86941e+06	22575132	1.39165e+07	1.33835e+07	1.42742e+07	1.14433e+07	1.12852e+07	1.15385e+07	1.14168e+07	9.82506e+06	1.19574e+07	1.15017e+07	1.13703e+07	12438674	1.61492e+07	1.54788e+07	17903842	5.6292e+06	5.16444e+06	6.11118e+06	1.32612e+07	1.21443e+07	1.39128e+07	1.29247e+07	1.28144e+07	1.346e+07	4.77227e+06	4344657	5.29055e+06	2.54491e+07	2.49069e+07	2.58232e+07	2.80851e+07	2.72823e+07	2.94837e+07	1.8252e+07	1.57231e+07	1.90438e+07	2.15804e+07	2.06597e+07	2.19655e+07	2.80564e+07
269000000	9.49429e+06	8.89665e+06	1.00433e+07	1.01701e+07	9.96644e+06	1.04506e+07	1.02728e+07	8.87061e+06	2.26092e+07	1.39195e+07	13385988	1.4278e+07	1.14451e+07	1.12867e+07	1.15404e+07	1.14189e+07	9.82592e+06	1.19598e+07	1.15038e+07	1.13722e+07	1.24433e+07	1.61538e+07	1.54827e+07	1.79132e+07	5.62975e+06	5.16478e+06	6.11198e+06	1.32641e+07	1.21462e+07	1.39168e+07	1.29275e+07	1.2817e+07	1.34633e+07	4.77271e+06	4.34496e+06	5.29122e+06	2.54599e+07	2.49171e+07	2.58349e+07	2.80993e+07	2.72951e+07	2.95038e+07	1.82575e+07	1.57267e+07	1.90504e+07	2.15882e+07	20666878	2.19741e+07	2.80698e+07
270000000	9.49575e+06	8.89772e+06	1.00453e+07	1.01717e+07	9.96789e+06	1.04523e+07	1.02748e+07	8.87179e+06	2.26432e+07	1.39225e+07	1.33885e+07	1.42817e+07	1.14469e+07	1.12881e+07	1.15422e+07	11420972	9.82677e+06	1.19622e+07	1.15058e+07	1.13741e+07	1.2448e+07	1.61584e+07	1.54867e+07	1.79225e+07	5.63029e+06	5.16512e+06	6.11278e+06	1.32669e+07	1.21482e+07	1.39208e+07	1.29302e+07	1.28196e+07	1.34665e+07	4773134	4.34527e+06	5.29188e+06	2.54707e+07	2.49272e+07	2.58465e+07	2.81135e+07	2.73077e+07	2.95239e+07	1.82629e+07	1.57302e+07	1.90569e+07	2.15959e+07	2.0674e+07	2.19826e+07	2.80832e+07
271000000	9.49721e+06	8.89879e+06	1.00473e+07	1.01732e+07	9.96933e+06	1.04539e+07	1.02768e+07	8.87297e+06	2.2677e+07	1.39254e+07	1.3391e+07	1.42854e+07	1.14487e+07	1.12896e+07	1.1544e+07	1.1423e+07	9.82761e+06	1.19646e+07	1.15079e+07	1.13761e+07	1.24526e+07	1.6163e+07	1.54905e+07	1.79318e+07	5.63083e+06	5.16546e+06	6.11357e+06	1.32698e+07	1.21501e+07	1.39248e+07	1.29329e+07	1.28222e+07	1.34698e+07	4773559	4345568	5.29253e+06	2.54814e+07	2.49372e+07	2.58581e+07	2.81275e+07	2.73203e+07	2.95438e+07	1.82683e+07	1.57337e+07	1.90633e+07	21603583	2.06811e+07	2.1991e+07	2.80965e+07
272000000	9.49865e+06	8.89984e+06	1.00493e+07	1.01748e+07	9.97077e+06	1.04555e+07	10278736	8.87414e+06	2.27108e+07	1.39283e+07	13393410	1.42891e+07	1.14504e+07	1.1291e+07	1.15458e+07	1.14251e+07	9.82844e+06	1.1967e+07	1.15099e+07	1.1378e+07	1.24572e+07	1.61675e+07	1.54944e+07	1.7941e+07	5.63137e+06	5.16579e+06	6.11436e+06	1.32726e+07	1.2152e+07	1.39288e+07	1.29356e+07	1.28248e+07	13473050	4773981	4.34587e+06	5.29318e+06	2.54921e+07	2.49472e+07	2.58696e+07	2.81415e+07	2.73329e+07	2.95637e+07	18273710	1.57372e+07	1.90697e+07	2.16112e+07	2.06881e+07	2.19994e+07	2.81098e+07
273000000	9.50008e+06	8.90089e+06	1.00513e+07	1.01763e+07	9.97219e+06	1.04572e+07	1.02807e+07	8.8753e+06	2.27444e+07	1.39312e+07	1.33958e+07	1.42928e+07	1.14522e+07	1.12924e+07	1.15475e+07	1.14271e+07	9829271	1.19693e+07	1.15119e+07	1.13798e+07	1.24618e+07	1.6172e+07	1.54982e+07	1.79501e+07	5.6319e+06	5.16613e+06	6.11514e+06	1.32755e+07	1.21539e+07	1.39327e+07	1.29383e+07	1.28274e+07	1.34763e+07	4774400	4.34616e+06	5.29383e+06	2.55026e+07	24957116	2.5881e+07	2.81554e+07	2.73453e+07	2.95834e+07	1.82791e+07	1.57407e+07	19076098	2.16188e+07	2.0695e+07	22007755	2.81229e+07
274000000	9.50151e+06	8.90193e+06	1.00532e+07	10177771	9.9736e+06	1.04588e+07	1.02826e+07	8.87646e+06	2.27779e+07	1.39341e+07	1.33983e+07	1.42965e+07	1.14539e+07	11293843	11549291	1.14291e+07	9830093	1.19717e+07	1.15139e+07	1.13817e+07	1.24663e+07	1.61765e+07	1.55021e+07	1.79592e+07	5.63243e+06	5.16645e+06	6.11591e+06	1.32783e+07	1.21558e+07	1.39366e+07	1.29409e+07	1.28299e+07	1.34795e+07	4774816	4.34646e+06	5294467	2.55132e+07	2.4967e+07	2.58923e+07	2.81692e+07	2.73576e+07	2.96031e+07	1.82844e+07	1.57441e+07	1.90824e+07	2.16263e+07	2.0702e+07	2.2016e+07	2.8136e+07
275000000	9.50292e+06	8.90296e+06	1.00552e+07	1.01793e+07	9.97501e+06	1.04604e+07	1.02846e+07	8.8776e+06	2.28113e+07	13937006	1.34007e+07	14300090	1.14556e+07	1.12952e+07	1.1551e+07	1.14311e+07	9.83091e+06	1.1974e+07	1.15159e+07	1.13836e+07	1.24709e+07	1.6181e+07	1.55058e+07	1.79683e+07	5.63296e+06	5.16678e+06	6.11668e+06	1.3281e+07	1.21577e+07	1.39405e+07	1.29436e+07	1.28324e+07	1.34826e+07	4.77523e+06	4.34675e+06	5.2951e+06	2.55236e+07	2.49768e+07	2.59036e+07	2.81829e+07	2.73699e+07	2.96227e+07	1.82896e+07	1.57475e+07	1.90887e+07	2.16338e+07	2.07089e+07	2.20243e+07	28148966
276000000	9.50432e+06	8.90399e+06	1.00571e+07	1.01807e+07	9.9764e+06	1.04619e+07	1.02865e+07	8.87874e+06	22844560	1.39399e+07	1.34031e+07	1.43037e+07	1.14573e+07	1.12966e+07	1.15528e+07	1.14331e+07	9.83172e+06	1.19763e+07	1.15178e+07	1.13854e+07	1.24754e+07	1.61854e+07	1.55096e+07	1.79773e+07	5.63348e+06	5167106	6.11744e+06	1.32838e+07	12159533	1.39444e+07	1.29462e+07	1.28349e+07	1.34858e+07	4.77564e+06	4.34704e+06	5.29574e+06	2.5534e+07	2.49865e+07	2.59147e+07	2.81966e+07	2.73821e+07	2.96421e+07	18294879	1.57509e+07	1.9095e+07	2.16412e+07	2.07157e+07	2.20325e+07	2.81619e+07
277000000	9.50572e+06	8.90501e+06	1.0059e+07	1.01822e+07	9.97778e+06	1.04635e+07	10288409	8.87986e+06	2.28777e+07	1.39427e+07	13405443	14307277	1.1459e+07	11298015	1.15545e+07	1.14351e+07	9.83252e+06	1.19786e+07	1.15198e+07	1.13873e+07	1.24798e+07	1.61898e+07	1.55133e+07	1.79863e+07	5.634e+06	5.16743e+06	6.1182e+06	1.32866e+07	12161384	1.39482e+07	1.29488e+07	1.28374e+07	1.34889e+07	4.77605e+06	4.34733e+06	5.29636e+06	2.55443e+07	2.49962e+07	2.59259e+07	2.82101e+07	2.73942e+07	2.96615e+07	1.83001e+07	1.57543e+07	1.91012e+07	2.16486e+07	2.07225e+07	2.20406e+07	2.81747e+07
278000000	9.5071e+06	8.90602e+06	10060893	1.01837e+07	9.97916e+06	1.04651e+07	1.02903e+07	8.88098e+06	2.29108e+07	1.39455e+07	1.34078e+07	1.43108e+07	1.14607e+07	1.12994e+07	11556208	1.14371e+07	9.83332e+06	1.19809e+07	1.15217e+07	1.13891e+07	1.24843e+07	1.61942e+07	1.5517e+07	1.79953e+07	5.63451e+06	5.16775e+06	6118955	1.32893e+07	1.21632e+07	1.39521e+07	1.29514e+07	1.28399e+07	1.3492e+07	4776451	4.34762e+06	5.29699e+06	2.55545e+07	2.50058e+07	2.59369e+07	2.82236e+07	2.74063e+07	2.96808e+07	1.83053e+07	1.57577e+07	1.91073e+07	2.1656e+07	2.07292e+07	2.20487e+07	28187438
279000000	9.50848e+06	8.90703e+06	1.00628e+07	1.01851e+07	9.98052e+06	1.04666e+07	1.02922e+07	8.8821e+06	2.29437e+07	1.39483e+07	1.34101e+07	1.43144e+07	1.14624e+07	1.13007e+07	1.15579e+07	1.1439e+07	9.83411e+06	11983110	11523640	1.13909e+07	1.24888e+07	1.61985e+07	1.55207e+07	1.80041e+07	5.63502e+06	5.16807e+06	6119703	1.3292e+07	1.2165e+07	1.39558e+07	1.29539e+07	12842363	1.34951e+07	4.77685e+06	4.3479e+06	5.2976e+06	25564722	2.50153e+07	2.59479e+07	28236982	2.74183e+07	2.96999e+07	1.83104e+07	15761008	1.91135e+07	2.16633e+07	2.07359e+07	2.20567e+07	2.82001e+07
280000000	9.50984e+06	8.90802e+06	1.00647e+07	1.01866e+07	9.98188e+06	1.04682e+07	1.02941e+07	8.8832e+06	2.29766e+07	1.39511e+07	1.34125e+07	1.43179e+07	1.14641e+07	1.13021e+07	1.15596e+07	1.1441e+07	9.83489e+06	1.19854e+07	1.15256e+07	1.13927e+07	1.24932e+07	1.62028e+07	1.55244e+07	1.8013e+07	5.63553e+06	5.16838e+06	6.12045e+06	1.32947e+07	1.21669e+07	1.39596e+07	1.29565e+07	1.28448e+07	1.34982e+07	4.77725e+06	4.34819e+06	5.29822e+06	2.55748e+07	2.50248e+07	2.59588e+07	2.82503e+07	2.74302e+07	2.9719e+07	1.83155e+07	1.57643e+07	1.91195e+07	2.16705e+07	2.07426e+07	2.20647e+07	2.82127e+07
281000000	9.5112e+06	8.90901e+06	1.00665e+07	1.0188e+07	9.98322e+06	1.04697e+07	1.02959e+07	8.8843e+06	2.30093e+07	1.39538e+07	1.34148e+07	14321385	1.14657e+07	1.13034e+07	11561272	1.14429e+07	9.83567e+06	1.19876e+07	1.15274e+07	1.13945e+07	1.24976e+07	1.62071e+07	1.5528e+07	1.80218e+07	5.63604e+06	5.16869e+06	6.12118e+06	1.32973e+07	1.21687e+07	1.39634e+07	1.2959e+07	1.28472e+07	1.35013e+07	4.77765e+06	4.34847e+06	5.29883e+06	2.55849e+07	25034215	2.59697e+07	2.82635e+07	2.7442e+07	2.9738e+07	1.83206e+07	1.57676e+07	19125585	2.16777e+07	2.07492e+07	2.20726e+07	2.82252e+07
282000000	9512548	8.91e+06	1.00684e+07	1.01894e+07	9.98456e+06	1.04712e+07	10297760	8.88539e+06	23041945	1.39566e+07	1.34171e+07	1.43249e+07	11467369	1.13048e+07	1.15629e+07	1.14448e+07	9.83645e+06	1.19898e+07	1.15293e+07	1.13963e+07	12501963	1.62113e+07	15531636	1.80306e+07	5.63654e+06	5.169e+06	6.12192e+06	1.33e+07	1.21705e+07	1.39671e+07	1.29615e+07	1.28496e+07	1.35043e+07	4.77804e+06	4348746	5.29944e+06	2.55949e+07	2.50436e+07	2.59805e+07	2.82767e+07	2.74538e+07	2.97569e+07	1.83256e+07	1.57709e+07	1.91316e+07	2.16849e+07	2.07558e+07	2.20805e+07	2.82376e+07
283000000	9.51389e+06	8.91098e+06	1.00702e+07	10190855	9.98589e+06	1.04727e+07	10299593	8.88647e+06	23074462	13959276	1.34194e+07	1.43283e+07	1.1469e+07	1.13061e+07	1.15646e+07	1.14467e+07	9.83721e+06	1.1992e+07	1.15312e+07	1.1398e+07	1.25063e+07	1.62156e+07	1.55352e+07	1.80393e+07	5.63703e+06	5.16931e+06	6.12264e+06	1.33026e+07	1.21722e+07	1.39709e+07	1.2964e+07	1.2852e+07	1.35073e+07	4.77843e+06	4.34902e+06	5.30004e+06	2.56048e+07	2.50529e+07	2.59912e+07	2.82898e+07	2.74655e+07	2.97757e+07	1.83306e+07	1.57741e+07	1.91376e+07	2.1692e+07	2.07623e+07	2.20884e+07	2.825e+07
284000000	9.51522e+06	8.91195e+06	1.0072e+07	1.01923e+07	9.98721e+06	1.04742e+07	1.03014e+07	8.88755e+06	2.31069e+07	1.3962e+07	13421617	14331740	1.14706e+07	1.13074e+07	1.15662e+07	1.14486e+07	9837974	1.19942e+07	1.15331e+07	1.13998e+07	12510665	1.62198e+07	15538790	1.80479e+07	5.63753e+06	5.16962e+06	6.12337e+06	1.33053e+07	1.2174e+07	1.39746e+07	1.29665e+07	1.28544e+07	13510292	4.77882e+06	4.3493e+06	5.30064e+06	2.56147e+07	2.50621e+07	2.60018e+07	2.83028e+07	2.74771e+07	2.97944e+07	1.83356e+07	1.57773e+07	1.91435e+07	2.1699e+07	20768812	2.20962e+07	2.82623e+07
285000000	9.51654e+06	8.91291e+06	1.00738e+07	1.01937e+07	9.98852e+06	1.04757e+07	1.03032e+07	8.88861e+06	2.31392e+07	1.39647e+07	1.34239e+07	1.43351e+07	11472233	1.13087e+07	1.15679e+07	1.14505e+07	9.83873e+06	1.19963e+07	11534917	1.14015e+07	1.2515e+07	1.62239e+07	1.55423e+07	1.80566e+07	5.63802e+06	5.16992e+06	6.12409e+06	1.33079e+07	1.21758e+07	1.39783e+07	1.2969e+07	1.28568e+07	1.35133e+07	4.7792e+06	4349571	5.30123e+06	2.56245e+07	2.50713e+07	2.60124e+07	2.83157e+07	2.74886e+07	2.9813e+07	1.83405e+07	1.57805e+07	19149393	21706065	2.07753e+07	22103897	2.82745e+07
286000000	9.51785e+06	8.91387e+06	1.00756e+07	1.0195e+07	9.98982e+06	1.04772e+07	1.0305e+07	8889675	23171372	1.39673e+07	1.34261e+07	1.43385e+07	1.14738e+07	1.131e+07	1.15695e+07	1.14523e+07	9.83948e+06	1.19985e+07	11536753	1.14033e+07	1.25193e+07	1.62281e+07	1.55459e+07	1.80652e+07	5.63851e+06	5.17023e+06	6.1248e+06	1.33104e+07	12177493	1.39821e+07	1.29714e+07	1.28591e+07	1.35162e+07	4.77959e+06	4.34984e+06	5.30182e+06	2.56343e+07	25080472	2.60229e+07	2.83285e+07	2.75001e+07	2.98316e+07	1.83454e+07	1.57837e+07	1.91553e+07	2.1713e+07	20781674	2.21116e+07	2.82866e+07
287000000	9.51915e+06	8914817	1.00774e+07	1.01964e+07	9991111	1.04787e+07	1.03068e+07	8.89073e+06	2.32035e+07	1.397e+07	1.34283e+07	1.43419e+07	1.14754e+07	11311265	1.15711e+07	1.14542e+07	9.84022e+06	1.20006e+07	1.15386e+07	1.1405e+07	1.25236e+07	1.62322e+07	1.55493e+07	1.80737e+07	5638990	5.17053e+06	6125508	1.3313e+07	1.21792e+07	1.39858e+07	1.29739e+07	1.28615e+07	1.35192e+07	4.77997e+06	4.35011e+06	5.30241e+06	2.5644e+07	2.50896e+07	2.60334e+07	2.83413e+07	27511506	2.985e+07	18350300	1.57869e+07	1.91611e+07	2.172e+07	2.0788e+07	2.21192e+07	2.82987e+07
288000000	9520446	8.91576e+06	1.00792e+07	1.01978e+07	9.99239e+06	10480109	1.03086e+07	8.89177e+06	2.32354e+07	1.39726e+07	1.34305e+07	1.43453e+07	1.1477e+07	1.13125e+07	1.15727e+07	1.1456e+07	9.84096e+06	1.20028e+07	1.15404e+07	1.14067e+07	1.25278e+07	1.62363e+07	1.55528e+07	1.80822e+07	5.63947e+06	5.17082e+06	6.12621e+06	1.33156e+07	1.21809e+07	1.39894e+07	1.29763e+07	1.28638e+07	1.35221e+07	4.78035e+06	4.35038e+06	5.30299e+06	2.56536e+07	2.50986e+07	2.60438e+07	2.8354e+07	27522845	2.98684e+07	1.83551e+07	1.579e+07	19166859	2.17269e+07	2.07944e+07	22126836	28310707
289000000	9.52173e+06	8.9167e+06	1.0081e+07	1.01991e+07	9993670	1.04816e+07	1.03103e+07	8.89281e+06	2.32673e+07	1.39752e+07	1.34327e+07	1.43486e+07	1.14786e+07	1.13138e+07	1.15743e+07	1.14579e+07	9.8417e+06	1.20049e+07	1.15422e+07	1.14084e+07	1.25321e+07	1.62404e+07	1.55563e+07	1.80907e+07	5639948	5.17112e+06	6.12691e+06	13318098	1.21827e+07	1.39931e+07	1.29787e+07	1.28661e+07	1.3525e+07	4.78072e+06	4.35064e+06	5.30357e+06	2.56632e+07	2.51075e+07	2.60542e+07	2.83666e+07	2.75341e+07	2.98867e+07	1.836e+07	1.57931e+07	1.91726e+07	2.17337e+07	2.08007e+07	2.21344e+07	2.83226e+07
290000000	9.52301e+06	8.91763e+06	1.00827e+07	1.02005e+07	9.99494e+06	1.0483e+07	1.03121e+07	8.89385e+06	2.32991e+07	1.39778e+07	1.34349e+07	1.43519e+07	1.14801e+07	11315054	1.15759e+07	1.14597e+07	9.84243e+06	1.2007e+07	1.1544e+07	1.14101e+07	1.25363e+07	1.62444e+07	1.55597e+07	1.80991e+07	5.64042e+06	5.17141e+06	6.12761e+06	1.33206e+07	12184349	1.39967e+07	1.29811e+07	1.28684e+07	1.35279e+07	4.78109e+06	4.35091e+06	5.30414e+06	2.56727e+07	2.51165e+07	26064431	2.83792e+07	2.75453e+07	2.99048e+07	1.83647e+07	1.57962e+07	1.91783e+07	2.17405e+07	2.08069e+07	2.21419e+07	28334484
291000000	9.52428e+06	8.91856e+06	1.00845e+07	10201833	9.9962e+06	1.04844e+07	1.03138e+07	8.89487e+06	2.33308e+07	1.39804e+07	1.34371e+07	1.43552e+07	1.14817e+07	1.13163e+07	1.15774e+07	1.14615e+07	9.84315e+06	1.2009e+07	1.15458e+07	1.14117e+07	1.25405e+07	1.62484e+07	1.55631e+07	1.81075e+07	5.64089e+06	5.17171e+06	6.1283e+06	1.33231e+07	1.2186e+07	1.40003e+07	1.29834e+07	1.28706e+07	13530715	4.78146e+06	4.35117e+06	5.30471e+06	2.56822e+07	2.51253e+07	2.60746e+07	2.83916e+07	27556458	29922933	1.83695e+07	1.57993e+07	19184001	2.17473e+07	20813130	2.21494e+07	2.83463e+07
292000000	9.52554e+06	8919475	1.00862e+07	1.02032e+07	9.99745e+06	1.04858e+07	1.03156e+07	8.89589e+06	2.33624e+07	1.3983e+07	1.34392e+07	1.43584e+07	1.14832e+07	1.13175e+07	1.1579e+07	1.14633e+07	9.84387e+06	1.20111e+07	1.15475e+07	1.14134e+07	1.25447e+07	1.62524e+07	1.55665e+07	1.81158e+07	5.64136e+06	5171997	6.12898e+06	1.33256e+07	1.21877e+07	1.40039e+07	1.29858e+07	1.28729e+07	1.35336e+07	4.78183e+06	4.35143e+06	5.30528e+06	2.56916e+07	2.51341e+07	2.60848e+07	2.8404e+07	2.75675e+07	2.99409e+07	1.83742e+07	15802392	1.91896e+07	2.1754e+07	2.08193e+07	22156778	2.8358e+07
293000000	9526792	8920388	1.00879e+07	1.02045e+07	9.99869e+06	1.04873e+07	1.03173e+07	8.8969e+06	2.33938e+07	13985514	1.34413e+07	1.43617e+07	1.14847e+07	1.13188e+07	11580533	11465047	9.84458e+06	1.20132e+07	1.15493e+07	1.14151e+07	1.25488e+07	1.62564e+07	1.55699e+07	1.81241e+07	5641826	5.17229e+06	6.12966e+06	13328077	1.21894e+07	14007441	1.29881e+07	1.28751e+07	1.35364e+07	4.7822e+06	4351690	5.30584e+06	2.57009e+07	2.51429e+07	26094904	2.84164e+07	2.75785e+07	2.99589e+07	1.83789e+07	1.58054e+07	1.91953e+07	2.17607e+07	2.08254e+07	2.21642e+07	2.83696e+07
294000000	9.52804e+06	8.92129e+06	1.00896e+07	1.02058e+07	9.99992e+06	1.04887e+07	10318981	8.89791e+06	2.34252e+07	13988046	1.34435e+07	14364929	1.14863e+07	1.132e+07	11582070	1.14668e+07	9.84529e+06	1.20152e+07	1.1551e+07	1.14167e+07	1.2553e+07	1.62603e+07	1.55732e+07	1.81324e+07	5.64229e+06	5.17257e+06	6.13034e+06	1.33305e+07	1.2191e+07	1.4011e+07	12990452	1.28774e+07	1.35392e+07	4.78256e+06	4.35195e+06	5.3064e+06	2.57102e+07	2.51516e+07	2.61049e+07	2.84286e+07	27589477	2.99767e+07	1.83836e+07	1.58085e+07	1.92008e+07	2.17673e+07	2.08315e+07	2.21715e+07	2.83812e+07
295000000	9529273	8.9222e+06	1.00913e+07	1.02071e+07	1.00011e+07	1.04901e+07	1.03207e+07	8.89891e+06	23456457	1.39906e+07	1.34456e+07	1.43681e+07	1.14878e+07	11321190	11583597	1.14686e+07	9.84599e+06	1.20172e+07	1.15527e+07	1.14183e+07	1.25571e+07	1.62643e+07	1.55765e+07	1.81406e+07	5.64275e+06	5.17286e+06	6.13101e+06	1.3333e+07	1.21927e+07	1.40145e+07	1.29928e+07	1.28796e+07	1.3542e+07	4.78292e+06	4.3522e+06	5.30696e+06	2.57194e+07	2.51602e+07	2.61149e+07	2.84408e+07	2.76004e+07	2.99945e+07	1.83882e+07	1.58115e+07	1.92064e+07	21773920	2.08376e+07	2.21788e+07	2.83927e+07
296000000	9.5305e+06	8.92309e+06	1.0093e+07	1.02084e+07	1.00024e+07	1.04914e+07	1.03224e+07	8.8999e+06	2.34876e+07	13993062	1.34477e+07	1.43713e+07	1.14893e+07	1.13224e+07	1.15851e+07	1.14703e+07	9.84669e+06	12019266	1.15545e+07	1.14199e+07	1.25612e+07	1.62681e+07	1.55798e+07	1.81488e+07	5643202	5.17314e+06	6.13168e+06	1.33354e+07	1.21943e+07	1.4018e+07	1.29951e+07	1.28818e+07	1.35448e+07	4.78328e+06	4.35246e+06	5.30751e+06	2.57286e+07	2.51688e+07	2.61248e+07	2.84529e+07	2.76112e+07	3.00122e+07	1.83928e+07	1.58144e+07	19211875	21780479	2.08436e+07	2.2186e+07	2.84042e+07
297000000	9.53172e+06	8923980	1.00947e+07	1.02097e+07	10003574	1.04928e+07	10324034	8.90089e+06	2.35187e+07	1.39955e+07	1.34497e+07	1.43745e+07	1.14907e+07	1.13236e+07	1.15866e+07	1.1472e+07	9.84738e+06	1.20213e+07	1.15562e+07	1.14216e+07	12565312	1.6272e+07	1.55831e+07	1.8157e+07	5.64365e+06	5.17342e+06	6.13234e+06	1.33378e+07	1.21959e+07	1.40215e+07	1.29973e+07	1.2884e+07	1.35475e+07	4.78363e+06	4.35271e+06	5.30806e+06	2.57377e+07	2.51774e+07	2.61347e+07	2.8465e+07	2.76219e+07	3.00297e+07	1.83974e+07	15817413	1.92173e+07	2.1787e+07	2.08496e+07	2.21932e+07	28415529
298000000	9.53293e+06	8.92486e+06	1.00964e+07	1.0211e+07	10004776	1.04942e+07	10325697	8.90187e+06	2.35497e+07	1.3998e+07	1.34518e+07	1.43777e+07	1.14922e+07	1.13248e+07	1.15881e+07	1.14738e+07	9.84806e+06	1.20233e+07	1.15579e+07	1.14232e+07	1.25694e+07	1.62759e+07	1.55864e+07	1.81651e+07	5.6441e+06	5.1737e+06	6133003	1.33402e+07	1.21975e+07	1.40249e+07	1.29996e+07	1.28861e+07	1.35503e+07	4.78399e+06	4.35296e+06	5308608	2.57468e+07	2.51859e+07	2.61445e+07	2.8477e+07	2.76326e+07	3.00473e+07	1.8402e+07	15820361	1.92228e+07	2.17935e+07	2.08556e+07	2.22004e+07	2.84268e+07
299000000	9.53414e+06	8.92574e+06	1.0098e+07	1.02122e+07	1.0006e+07	1.04955e+07	1.03273e+07	8.90284e+06	2.35805e+07	1.40005e+07	1.34539e+07	1.43808e+07	11493689	1.13259e+07	1.15896e+07	1.14755e+07	9848747	1.20253e+07	1.15596e+07	11424743	1.25734e+07	1.62797e+07	1.55896e+07	1.81731e+07	5.64455e+06	5.17397e+06	6.13366e+06	1.33426e+07	1.21991e+07	1.40284e+07	1.30019e+07	1.28883e+07	1.3553e+07	4.78434e+06	4.35321e+06	5309150	2.57558e+07	2.51943e+07	2.61543e+07	2.84889e+07	2.76432e+07	3.00647e+07	1.84065e+07	1.58233e+07	1.92282e+07	2.17999e+07	2.08615e+07	2.22075e+07	2.84381e+07
300000000	9.53534e+06	8.92661e+06	1.00997e+07	1.02135e+07	1.00072e+07	10496882	1.0329e+07	8.90381e+06	23611282	1.40029e+07	1.34559e+07	1.43839e+07	1.14951e+07	11327112	1.15911e+07	1.14772e+07	9.84942e+06	1.20273e+07	1.15612e+07	1.14263e+07	1.25775e+07	1.62835e+07	1.55928e+07	1.81812e+07	5.645e+06	5.17425e+06	6.13431e+06	13344941	1.22007e+07	1.40318e+07	1.30041e+07	1.28904e+07	1.35557e+07	4784685	4.35345e+06	5.30969e+06	2.57648e+07	2.52027e+07	2.6164e+07	2.85007e+07	2.76538e+07	3.0082e+07	1.8411e+07	1.58262e+07	1.92336e+07	21806322	2.08674e+07	2.22146e+07	28449263
301000000	9536527	8.92748e+06	1.01013e+07	1.02148e+07	1.00083e+07	1.04982e+07	1.03306e+07	8.90477e+06	2.36419e+07	1.40053e+07	1.34579e+07	1.4387e+07	1.14966e+07	1.13283e+07	1.15926e+07	1.14789e+07	9.8501e+06	1.20293e+07	1.15629e+07	1.14279e+07	1.25815e+07	1.62873e+07	1.5596e+07	1.81892e+07	5.64544e+06	5.17452e+06	6.13496e+06	1.33473e+07	1.22023e+07	1.40352e+07	1.30063e+07	12892571	13558375	4.78503e+06	4.3537e+06	5.31022e+06	2.57737e+07	25211071	2.61736e+07	2.85125e+07	2.76643e+07	3.00993e+07	1.84154e+07	1.58291e+07	1.92389e+07	2.18127e+07	2.08732e+07	2.22216e+07	2.84604e+07
302000000	9.53771e+06	8.92834e+06	1.0103e+07	1.0216e+07	1.00095e+07	1.04996e+07	1.03322e+07	8.90572e+06	2.36725e+07	1.40077e+07	13459945	1.43901e+07	1.1498e+07	1.13294e+07	1.1594e+07	1.14806e+07	9.85077e+06	1.20313e+07	1.15646e+07	1.14294e+07	1.25855e+07	1.6291e+07	1.55992e+07	1.81971e+07	5.64587e+06	5.17479e+06	6135599	1.33496e+07	1.22039e+07	1.40386e+07	1.30085e+07	1.28947e+07	1.3561e+07	4.78538e+06	4.35394e+06	5.31076e+06	2.57826e+07	2.52194e+07	2.61832e+07	2.85242e+07	2.76747e+07	3.01165e+07	1.84199e+07	1.5832e+07	1.92442e+07	2.1819e+07	2.0879e+07	2.22286e+07	2.84714e+07
303000000	9538884	8.92919e+06	1.01046e+07	10217255	1.00107e+07	1.05009e+07	1.03339e+07	8.90667e+06	2.3703e+07	1.40101e+07	1.34619e+07	1.43932e+07	1.14995e+07	1.13306e+07	1.15955e+07	1.14822e+07	9.85143e+06	1.20332e+07	1.15662e+07	1.1431e+07	1.25895e+07	1.62947e+07	1.56024e+07	1.8205e+07	5.64631e+06	5.17506e+06	6.13624e+06	1.33519e+07	12205446	14041932	1.30107e+07	1.28968e+07	1.35637e+07	4.78572e+06	4.35418e+06	5.31128e+06	2.57914e+07	2.52276e+07	2.61927e+07	28535860	2.76851e+07	3.01336e+07	1.84243e+07	1.58348e+07	1.92495e+07	2.18253e+07	2.08848e+07	2.22355e+07	2.84824e+07
304000000	9.54005e+06	8.93004e+06	1.01062e+07	1.02185e+07	1.00118e+07	1.05022e+07	1.03355e+07	8.90761e+06	2.37334e+07	1.40125e+07	1.34639e+07	1.43962e+07	1.15009e+07	1.13317e+07	1.15969e+07	1.14839e+07	9.85206e+06	1.20352e+07	1.15678e+07	1.14325e+07	1.25934e+07	1.62985e+07	1.56055e+07	1.82129e+07	5.64674e+06	5175330	6.13687e+06	1.33543e+07	12206998	1.40453e+07	1.30129e+07	1.28989e+07	1.35663e+07	4.78606e+06	4354425	5.31181e+06	2.58002e+07	2.52358e+07	2.62022e+07	2.85474e+07	2.76954e+07	3.01507e+07	1.84287e+07	1.58377e+07	1.92548e+07	2.18316e+07	2.08905e+07	2.22424e+07	28493346
305000000	9.54121e+06	8.93089e+06	1.01078e+07	1.02197e+07	10012977	1.05035e+07	1.03371e+07	8.90855e+06	2.37636e+07	1.40149e+07	1.34659e+07	1.43992e+07	1.15023e+07	1.13328e+07	1.15983e+07	1.14855e+07	9852690	1.20371e+07	1.15695e+07	1.14341e+07	1.25974e+07	16302138	15608635	1.82208e+07	5647172	5175596	6.1375e+06	1.33565e+07	1.22085e+07	1.40486e+07	1.30151e+07	1.2901e+07	1.3569e+07	4.7864e+06	4354664	5.31233e+06	2.58089e+07	2.5244e+07	2.62116e+07	2.8559e+07	27705713	3.01676e+07	18433033	1.58405e+07	1.926e+07	2.18378e+07	2.08962e+07	2.22493e+07	2.85042e+07
306000000	9.54236e+06	8.93173e+06	1.01094e+07	1.02209e+07	1.00141e+07	10504795	10338632	8.90948e+06	2.37938e+07	1.40172e+07	1.34679e+07	1.44023e+07	1.15037e+07	1.1334e+07	1.15998e+07	1.14872e+07	9.85331e+06	1.2039e+07	1.15711e+07	1.14356e+07	1.26013e+07	1.63058e+07	1.56117e+07	1.82286e+07	5.6476e+06	5.17586e+06	6138130	1.33588e+07	1.22101e+07	1.40519e+07	1.30172e+07	1.2903e+07	1.35716e+07	4.78673e+06	4.3549e+06	5312849	2.58175e+07	2.52521e+07	2.6221e+07	2.85704e+07	2.77159e+07	30184506	1.84374e+07	1.58433e+07	1.92652e+07	2.18439e+07	2.09019e+07	2.22561e+07	2.8515e+07
307000000	9543510	8932560	1.0111e+07	1.02221e+07	1.00153e+07	10506085	1.03402e+07	8.9104e+06	2.38239e+07	14019554	1.34698e+07	1.44053e+07	1.15051e+07	1.13351e+07	1.16012e+07	1.14888e+07	9.85393e+06	12040942	11572686	1.14371e+07	1.26052e+07	1.63094e+07	1.56148e+07	18236354	5.64802e+06	5.17612e+06	6.13875e+06	1.33611e+07	1.22116e+07	1.40552e+07	1.30194e+07	1.29051e+07	1.35742e+07	4.78706e+06	4.35514e+06	5.31336e+06	25826143	2.52601e+07	2.62303e+07	2.85818e+07	2.77261e+07	3.02013e+07	1.84417e+07	1.58461e+07	1.92703e+07	2.18501e+07	20907533	2.22629e+07	2.85258e+07
308000000	9.54465e+06	8933388	1.01125e+07	1.02233e+07	1.00164e+07	1.05074e+07	1.03418e+07	8.91132e+06	2.38539e+07	1.40219e+07	1.34718e+07	1.44082e+07	1.15065e+07	1.13362e+07	1.16026e+07	1.14904e+07	9.85455e+06	1.20428e+07	1.15743e+07	1.14386e+07	1.26091e+07	16313064	1.56179e+07	1.82441e+07	5.64845e+06	5.17638e+06	6.13937e+06	1.33633e+07	1.22131e+07	1.40584e+07	1.30215e+07	1.29071e+07	1.35768e+07	4.7874e+06	4355372	5.31388e+06	2.58347e+07	2.52681e+07	2.62396e+07	28593131	2.77362e+07	3.0218e+07	1.8446e+07	1.58489e+07	1.92754e+07	2.18562e+07	2.09131e+07	2.22697e+07	2.85364e+07
309000000	9545780	8.93421e+06	1.01141e+07	1.02245e+07	1.00175e+07	1.05086e+07	1.03433e+07	8.91224e+06	2.38838e+07	1.40242e+07	1.34737e+07	1.44112e+07	1.15079e+07	1.13373e+07	1.1604e+07	1.1492e+07	9.85516e+06	12044730	1.15759e+07	1.14401e+07	1.2613e+07	1.63167e+07	1.56209e+07	1.82518e+07	5.64886e+06	5.17664e+06	6139987	1.33656e+07	12214615	1.40617e+07	1.30236e+07	1.29092e+07	13579315	4.78772e+06	4355605	5.31439e+06	2.58432e+07	2.52761e+07	26248761	2.86044e+07	2.77462e+07	3.02347e+07	1.84502e+07	1.58516e+07	1.92805e+07	2.18623e+07	2.09187e+07	2.22764e+07	2.85471e+07
310000000	9.5469e+06	8.93503e+06	1.01156e+07	1.02257e+07	1.00186e+07	10509907	1.03449e+07	8.91314e+06	2.39136e+07	14026473	1.34756e+07	1.44141e+07	1.15092e+07	1.13384e+07	1.16054e+07	11493611	9.85576e+06	1.20466e+07	1.15774e+07	11441572	1.26169e+07	1.63202e+07	1.5624e+07	1.82595e+07	5.64928e+06	5.1769e+06	6.1406e+06	1.33678e+07	1.22161e+07	1.40649e+07	1.30257e+07	1.29112e+07	1.35819e+07	4.78805e+06	4.35584e+06	5.31489e+06	2.58517e+07	2.5284e+07	2.62579e+07	2.86156e+07	2.77562e+07	3.02513e+07	1.84544e+07	1.58544e+07	1.92856e+07	2.18683e+07	20924247	2.22831e+07	2.85576e+07
311000000	9.54802e+06	8935841	1.01172e+07	10226900	1.00197e+07	1.05112e+07	1.03464e+07	8.91404e+06	2.39433e+07	1.40288e+07	1.34775e+07	1.44171e+07	1.15106e+07	1.13394e+07	1.16067e+07	1.14952e+07	9.85636e+06	1.20485e+07	1.1579e+07	1.1443e+07	1.26207e+07	1.63238e+07	1.5627e+07	1.82671e+07	5.64969e+06	5.17716e+06	6.14121e+06	1.337e+07	1.22176e+07	1.40681e+07	1.30278e+07	1.29132e+07	1.35844e+07	4.78838e+06	4.35607e+06	5.31539e+06	2.58601e+07	25291912	2.6267e+07	2.86267e+07	2.77661e+07	3.02678e+07	1.84586e+07	1.58571e+07	1.92906e+07	2.18743e+07	2.09298e+07	2.22897e+07	2.85681e+07
312000000	9549133	8.93665e+06	1.01187e+07	1.02281e+07	1.00208e+07	1.05124e+07	1.03479e+07	8.91494e+06	2.39729e+07	1.4031e+07	1.34794e+07	1.442e+07	1.15119e+07	1.13405e+07	1.16081e+07	1.14968e+07	9.85696e+06	12050330	1.15806e+07	11444510	1.26245e+07	1.63273e+07	1.563e+07	1.82747e+07	5.65011e+06	5.17741e+06	6.14181e+06	1.33722e+07	1.22191e+07	1.40713e+07	1.30299e+07	1.29152e+07	1.35869e+07	4.7887e+06	4.3563e+06	5.31589e+06	2.58685e+07	2.52997e+07	2.62761e+07	2.86378e+07	2.7776e+07	3.02842e+07	1.84628e+07	15859784	1.92956e+07	2.18803e+07	2.09352e+07	2.22963e+07	2.85786e+07
313000000	9.55024e+06	8.93745e+06	1.01203e+07	1.02292e+07	1.00219e+07	1.05137e+07	1.03494e+07	8.91583e+06	2.40025e+07	1.40333e+07	1.34813e+07	1.44229e+07	1.15133e+07	1.13416e+07	1.16095e+07	1.14983e+07	9.85755e+06	1.20522e+07	1.15821e+07	1.1446e+07	1.26284e+07	1.63308e+07	1.56329e+07	1.82823e+07	5.65051e+06	5.17766e+06	6142410	1.33744e+07	1.22205e+07	1.40745e+07	1.3032e+07	1.29171e+07	1.35894e+07	4.78902e+06	4.35652e+06	5.31639e+06	2.58768e+07	2.53075e+07	2.62851e+07	28648840	2.77858e+07	3.03006e+07	1.8467e+07	1.58625e+07	1.93006e+07	21886193	2.09407e+07	2.23029e+07	2.8589e+07
314000000	9.55133e+06	8.93825e+06	1.01218e+07	1.02304e+07	1.0023e+07	1.05149e+07	1.03509e+07	8.91672e+06	24031892	1.40355e+07	1.34832e+07	1.44258e+07	1.15146e+07	11342644	1.16108e+07	1.14999e+07	9.85814e+06	1.2054e+07	1.15836e+07	1.14474e+07	1.26321e+07	1.63343e+07	1.56359e+07	1.82898e+07	5.65092e+06	5.17791e+06	6.14301e+06	1.33766e+07	12221982	1.40777e+07	1.3034e+07	12919114	1.35919e+07	4.78934e+06	4.35675e+06	5.31688e+06	2.58851e+07	2.53153e+07	2.6294e+07	2.86598e+07	2.77955e+07	3.03169e+07	1.84711e+07	1.58651e+07	1.93056e+07	2.18921e+07	2.09461e+07	2.23094e+07	2.85993e+07
315000000	9.55242e+06	8.93904e+06	1.01233e+07	1.02315e+07	1.00241e+07	1.05161e+07	1.03524e+07	8.9176e+06	2.40612e+07	1.40377e+07	1.3485e+07	1.44286e+07	1.1516e+07	1.13437e+07	1.16122e+07	1.15015e+07	9.85873e+06	1.20558e+07	11585177	11448850	1.26359e+07	1.63378e+07	1.56388e+07	1.82973e+07	5.65132e+06	5.17816e+06	6.1436e+06	1.33787e+07	12223414	1.40808e+07	1.30361e+07	12921070	1.35944e+07	4.78966e+06	4.35697e+06	5317373	2.58933e+07	2.5323e+07	2.6303e+07	2.86707e+07	2.78052e+07	3.03331e+07	18475217	1.58678e+07	1.93105e+07	2.1898e+07	2.09515e+07	2.23159e+07	2.86096e+07
316000000	9.55351e+06	8.93983e+06	1.01248e+07	1.02327e+07	1.00252e+07	1.05173e+07	1.03539e+07	8.91847e+06	2.40905e+07	1.40399e+07	1.34869e+07	1.44315e+07	1.15173e+07	1.13447e+07	1.16135e+07	1.1503e+07	9.85931e+06	1.20576e+07	1.15867e+07	1.14503e+07	1.26397e+07	1.63413e+07	1.56418e+07	1.83048e+07	5651725	5.17841e+06	6.14419e+06	1.33809e+07	1.22248e+07	1.40839e+07	13038115	1.2923e+07	1.35968e+07	4.78997e+06	4.3572e+06	5.31786e+06	2.59015e+07	2.53306e+07	2.63118e+07	2.86815e+07	2.78149e+07	3.03492e+07	1.84793e+07	1.58704e+07	1.93154e+07	2.19038e+07	2.09568e+07	2.23223e+07	2.86198e+07
317000000	9.55459e+06	8.94061e+06	1.01263e+07	1.02338e+07	1.00262e+07	1.05186e+07	1.03554e+07	8.91934e+06	2.41196e+07	1.40421e+07	1.34887e+07	1.44343e+07	1.15186e+07	1.13458e+07	1.16148e+07	1.15045e+07	9.85989e+06	1.20594e+07	1.15882e+07	1.14517e+07	1.26434e+07	1.63447e+07	1.56447e+07	1.83122e+07	5.65212e+06	5.17866e+06	6.14477e+06	1.3383e+07	1.22263e+07	1.4087e+07	1.30401e+07	12924947	13599279	4.79028e+06	4357417	5.31834e+06	2.59096e+07	2.53382e+07	2.63206e+07	28692325	2.78245e+07	3.03653e+07	1.84834e+07	1.58731e+07	1.93202e+07	2.19096e+07	2.09621e+07	22328755	28629935
318000000	9.55566e+06	8.94139e+06	1.01277e+07	1.0235e+07	1.00273e+07	1.05198e+07	10356881	8.9202e+06	2.41487e+07	1.40443e+07	13490554	1.44371e+07	1.15199e+07	1.13468e+07	1.16162e+07	1.1506e+07	9.86046e+06	1.20612e+07	1.15897e+07	1.14531e+07	1.26472e+07	1.63481e+07	1.56476e+07	1.83196e+07	5.65252e+06	5178903	6.14536e+06	1.33851e+07	1.22277e+07	14090114	13042140	1.29269e+07	1.36017e+07	4.7906e+06	4.35764e+06	5.31883e+06	2.59177e+07	2.53458e+07	2.63294e+07	28703050	2.7834e+07	3.03813e+07	1.84874e+07	1.58757e+07	1.93251e+07	2.19153e+07	2.09674e+07	2.23351e+07	2.864e+07
319000000	9.55672e+06	8.94216e+06	10129214	10236079	1.00283e+07	1.0521e+07	1.03583e+07	8.92106e+06	2.41777e+07	14046496	1.34924e+07	1.44399e+07	1.15212e+07	1.13478e+07	1.16175e+07	11507555	9.86103e+06	1.2063e+07	1.15912e+07	1.14545e+07	1.26509e+07	1.63515e+07	1.56504e+07	1.8327e+07	5.65291e+06	5.17915e+06	6.14594e+06	1.33873e+07	1.22291e+07	1.40932e+07	1.30441e+07	12928778	1.36041e+07	4.79091e+06	4.35786e+06	5.3193e+06	2.59257e+07	2.53533e+07	2.63381e+07	2.87137e+07	2.78435e+07	3.03972e+07	1.84914e+07	1.58783e+07	1.93299e+07	2.19211e+07	2.09727e+07	2.23415e+07	2.86501e+07
320000000	9.55778e+06	8.94293e+06	1.01307e+07	1.02372e+07	1.00294e+07	1.05221e+07	1.03598e+07	8.92192e+06	2.42066e+07	1.40487e+07	1.34942e+07	1.44427e+07	1.15225e+07	1.13489e+07	1.16188e+07	11509058	9.8616e+06	1.20648e+07	1.15927e+07	1.14559e+07	1.26546e+07	1.63549e+07	1.56533e+07	1.83343e+07	5653305	5.17939e+06	6.14651e+06	1.33894e+07	1.22304e+07	1.40962e+07	1.30461e+07	1.29307e+07	1.36065e+07	4.79121e+06	4.35807e+06	5.31978e+06	2.59337e+07	25360815	2.63468e+07	2.87243e+07	2.78529e+07	3.04131e+07	1.84954e+07	1.58809e+07	1.93347e+07	2.19268e+07	2.09779e+07	2.23478e+07	2.86601e+07
321000000	9.55883e+06	8943694	1.01321e+07	1.02383e+07	1.00304e+07	1.05233e+07	1.03612e+07	8.92276e+06	2.42354e+07	1.40508e+07	1.3496e+07	1.44455e+07	1.15238e+07	1.13499e+07	11620083	1.15106e+07	9.86216e+06	1.20665e+07	1.15942e+07	1.14573e+07	1.26583e+07	1.63582e+07	1.56561e+07	1.83416e+07	5.65369e+06	5.17963e+06	6.14708e+06	1.33914e+07	1.22318e+07	1.40993e+07	1.30481e+07	1.29326e+07	1.36089e+07	4.79152e+06	4.35829e+06	5.32025e+06	25941701	25368258	2.63554e+07	2.87349e+07	2.78623e+07	3.04289e+07	18499359	1.58834e+07	1.93394e+07	2.19324e+07	2.09831e+07	2.23541e+07	2.867e+07
322000000	9.55988e+06	8.94445e+06	1.01336e+07	1.02394e+07	1.00315e+07	1.05245e+07	1.03627e+07	8.92361e+06	2.42641e+07	1.40529e+07	1.34978e+07	1.44482e+07	1.1525e+07	1.13509e+07	11621373	1.1512e+07	9.86272e+06	1.20683e+07	1.15956e+07	1.14587e+07	1.26619e+07	1.63616e+07	15658944	1.83489e+07	5.65408e+06	5.17987e+06	6.14765e+06	1.33935e+07	1.22332e+07	1.41023e+07	1.305e+07	12934440	1.36113e+07	4.79182e+06	4.3585e+06	5.32072e+06	2.59496e+07	2.53757e+07	2.6364e+07	2.87454e+07	2.78717e+07	3.04446e+07	1.85033e+07	15885983	1.93441e+07	21938068	20988261	2.23603e+07	2.86799e+07
323000000	9.56092e+06	8.94521e+06	10135018	1.02405e+07	1.00325e+07	1.05257e+07	1.03641e+07	8.92444e+06	2.42927e+07	1.40551e+07	1.34995e+07	1.4451e+07	1.15263e+07	1.13519e+07	1.16227e+07	1.15135e+07	9.86327e+06	1.207e+07	1.15971e+07	1.146e+07	1.26656e+07	1.63649e+07	1.56617e+07	1.83561e+07	5654465	5.1801e+06	6.14822e+06	1.33956e+07	1.22346e+07	1.41053e+07	1.3052e+07	1.29363e+07	13613652	4.79212e+06	4.35872e+06	5.32119e+06	2.59575e+07	2.5383e+07	2.63725e+07	2.87558e+07	2.7881e+07	3.04603e+07	1.85072e+07	1.58885e+07	1.93488e+07	2.19437e+07	2.09934e+07	22366515	2.86897e+07
324000000	9.56195e+06	8.94596e+06	1.01364e+07	10241594	1.00335e+07	1.05268e+07	1.03655e+07	8.92528e+06	2.43212e+07	1.40572e+07	1.35013e+07	1.44537e+07	1.15275e+07	1.13529e+07	11623930	1.1515e+07	9.86382e+06	1.20718e+07	1.15985e+07	1.14614e+07	1.26692e+07	1.63682e+07	1.56645e+07	1.83633e+07	5654847	5.18034e+06	6.14878e+06	1.33976e+07	1.22359e+07	1.41083e+07	1.30539e+07	1.29382e+07	1.3616e+07	4.79242e+06	4.35893e+06	5.32166e+06	2.59653e+07	2.53903e+07	2.6381e+07	2.87662e+07	2.78902e+07	3.04758e+07	1.85111e+07	1.5891e+07	1.93535e+07	2.19492e+07	2.09985e+07	2.23727e+07	2.86995e+07
325000000	9562977	8.9467e+06	1.01379e+07	1.02427e+07	1.00345e+07	1.0528e+07	1.03669e+07	8.92611e+06	2.43497e+07	1.40593e+07	1.3503e+07	1.44564e+07	1.15288e+07	1.13539e+07	1.16252e+07	1.15164e+07	9.86437e+06	1.20735e+07	1.16e+07	1.14628e+07	1.26729e+07	1.63715e+07	1.56673e+07	1.83705e+07	5.65523e+06	5.18057e+06	6.14934e+06	1.33997e+07	1.22373e+07	1.41113e+07	1.30559e+07	1.294e+07	1.36183e+07	4.79272e+06	4.35914e+06	5.32212e+06	2.59731e+07	25397621	2.63894e+07	2.87765e+07	2.78994e+07	3.04914e+07	1.8515e+07	1.58935e+07	1.93582e+07	2.19548e+07	21003590	2.23788e+07	2.87093e+07
326000000	9.564e+06	8.94744e+06	1.01393e+07	1.02438e+07	1.00355e+07	10529148	1.03683e+07	8.92693e+06	2.4378e+07	1.40614e+07	1.35048e+07	1.44591e+07	1.153e+07	1.13548e+07	1.16265e+07	1.15179e+07	9864914	1.20752e+07	1.16014e+07	1.14641e+07	1.26765e+07	1.63747e+07	1.56701e+07	1.83776e+07	5.6556e+06	5.18081e+06	6.14989e+06	1.34017e+07	1.22386e+07	1.41142e+07	1.30578e+07	1.29418e+07	1.36207e+07	4.79302e+06	4.35935e+06	5.32258e+06	2.59808e+07	2.54049e+07	2.63978e+07	2.87868e+07	2.79085e+07	3.05068e+07	1.85188e+07	15896042	19362791	2.19603e+07	2.10086e+07	2.23849e+07	2.87189e+07
327000000	9.56501e+06	8.94818e+06	1.01407e+07	1.02448e+07	1.00365e+07	1.05303e+07	1.03697e+07	8.92775e+06	2.44063e+07	1.40634e+07	1.35065e+07	1.44618e+07	1.15313e+07	1.13558e+07	1.16277e+07	1.15193e+07	9.86545e+06	1.20769e+07	1.16028e+07	1.14654e+07	1.26801e+07	1.6378e+07	1.56728e+07	1.83847e+07	5.65598e+06	5.18104e+06	6.15044e+06	1.34037e+07	1.22399e+07	1.41172e+07	1.30597e+07	1.29437e+07	1.3623e+07	4.79331e+06	4.35956e+06	5.32303e+06	2.59885e+07	2.54121e+07	2.64061e+07	2.8797e+07	2.79176e+07	3.05222e+07	1.85227e+07	1.58985e+07	1.93674e+07	2.19658e+07	2.10137e+07	2.2391e+07	2.87286e+07
328000000	9.56602e+06	8.94891e+06	1.01421e+07	1.02459e+07	1.00375e+07	1.05314e+07	1.03711e+07	8.92856e+06	2.44345e+07	1.40655e+07	13508242	1.44645e+07	1.15325e+07	1.13568e+07	1.1629e+07	1.15208e+07	9.86599e+06	1.20786e+07	1.16042e+07	1.14668e+07	1.26837e+07	1.63812e+07	1.56755e+07	1.83918e+07	5.65635e+06	5.18127e+06	6.15099e+06	1.34057e+07	1.22413e+07	1.41201e+07	1.30616e+07	1.29455e+07	1.36253e+07	4.79361e+06	4.35977e+06	5.32349e+06	2.59962e+07	2.54192e+07	2.64144e+07	2.88072e+07	2.79266e+07	3.05375e+07	18526489	1.5901e+07	19371959	2.19712e+07	2.10187e+07	2.2397e+07	2.87381e+07
329000000	9.56703e+06	8.94964e+06	1.01435e+07	1.02469e+07	1.00385e+07	1.05326e+07	1.03725e+07	8.92937e+06	2.44626e+07	14067534	1.351e+07	1.44671e+07	1.15337e+07	11357749	1.16302e+07	1.15222e+07	9.86652e+06	1.20803e+07	1.16056e+07	11468101	1.26872e+07	1.63844e+07	1.56782e+07	1.83988e+07	5656723	5.1815e+06	6.15154e+06	1.34077e+07	1.22426e+07	1.4123e+07	1.30635e+07	12947271	1.36275e+07	4.7939e+06	4.35997e+06	5.32394e+06	26003812	2.54263e+07	2.64227e+07	2.88173e+07	2.79356e+07	3.05528e+07	1.85303e+07	1.59034e+07	19376505	2.19766e+07	2.10236e+07	2.24031e+07	2.87476e+07
330000000	9.56802e+06	8.95036e+06	1.01449e+07	1.0248e+07	1.00395e+07	1.05337e+07	1.03739e+07	8.93017e+06	24490590	1.40696e+07	1.35117e+07	1.44697e+07	1.15349e+07	1.13587e+07	1.16314e+07	1.15236e+07	9.86705e+06	1.20819e+07	1.1607e+07	1.14694e+07	1.26908e+07	1.63876e+07	15680941	1.84059e+07	5.65709e+06	5181726	6.15208e+06	1.34097e+07	1.22439e+07	1.41259e+07	1.30653e+07	1.29491e+07	1.36298e+07	4794187	4.36018e+06	5.32439e+06	2.60114e+07	2.54334e+07	2.64309e+07	28827390	2.79446e+07	3.0568e+07	1.8534e+07	1.59059e+07	1.9381e+07	2.1982e+07	2.10286e+07	2.2409e+07	2.87571e+07
331000000	9.56901e+06	8.95108e+06	1.01462e+07	10249045	1.00405e+07	1.05348e+07	1.03752e+07	8.93097e+06	2.45185e+07	14071598	13513350	1.44724e+07	1.15361e+07	1.13597e+07	1.16326e+07	1.1525e+07	9.86758e+06	1.20836e+07	1.16084e+07	1.14707e+07	1.26943e+07	1.63908e+07	1.56836e+07	1.84128e+07	5657458	5.18195e+06	6.15262e+06	1.34117e+07	1.22452e+07	1.41288e+07	1.30672e+07	1.29508e+07	1.36321e+07	4.79447e+06	4.36038e+06	5.32483e+06	2.60189e+07	2.54405e+07	2.64391e+07	2.88374e+07	2.79535e+07	30583093	1.85378e+07	1.59083e+07	1.93855e+07	2.19874e+07	2.10335e+07	2.2415e+07	2.87665e+07
332000000	9.57e+06	8.9518e+06	1.01476e+07	1.02501e+07	1.00415e+07	10535903	1.03766e+07	8.93177e+06	2.45464e+07	1.40736e+07	1.3515e+07	1.4475e+07	1.15373e+07	1.13606e+07	1.16339e+07	1.15264e+07	9.8681e+06	1.20852e+07	11609816	1.1472e+07	1.26978e+07	1.63939e+07	1.56863e+07	1.84198e+07	5.65782e+06	5.18218e+06	6.15315e+06	1.34136e+07	1.22465e+07	1.41316e+07	1.3069e+07	12952613	1.36343e+07	4.79476e+06	4.36058e+06	5.32527e+06	2.60264e+07	2.54475e+07	2.64472e+07	2.88474e+07	27962315	3.05982e+07	18541515	1.59107e+07	1.939e+07	2.19927e+07	2.10384e+07	2.24209e+07	2.87759e+07
333000000	9.57098e+06	8.95251e+06	1.0149e+07	1.02511e+07	1.00424e+07	1.0537e+07	1.03779e+07	8.93256e+06	2.45741e+07	1.40756e+07	1.35167e+07	1.44776e+07	1.15385e+07	1.13615e+07	1.16351e+07	1.15278e+07	9.86862e+06	1.20869e+07	1.16112e+07	1.14733e+07	1.27013e+07	16397049	1.56889e+07	1.84267e+07	5.65818e+06	5.1824e+06	6153686	1.34156e+07	1.22478e+07	1.41345e+07	1.30709e+07	1.29544e+07	1.36365e+07	4.79505e+06	4.36078e+06	5.32572e+06	2.60339e+07	2.54545e+07	2.64553e+07	2.88573e+07	2.79711e+07	3.06132e+07	1.85452e+07	1.59131e+07	1.93944e+07	21998013	2.10432e+07	2.24268e+07	2.87852e+07
334000000	9.57196e+06	8.95322e+06	1.01503e+07	10252146	1.00434e+07	1.05381e+07	1.03793e+07	8.93334e+06	24601792	1.40776e+07	1.35184e+07	1.44802e+07	11539722	1.13625e+07	1.16363e+07	1.15292e+07	9.86914e+06	1.20885e+07	1.16126e+07	1.14746e+07	1.27048e+07	16400167	1.56916e+07	1.84336e+07	5.65854e+06	5.18262e+06	6.15422e+06	1.34175e+07	1.22491e+07	1.41373e+07	1.30727e+07	1.29561e+07	1.36388e+07	4795328	4.36098e+06	5.32615e+06	2.60413e+07	2.54614e+07	2.64633e+07	2.88671e+07	2.79799e+07	3.06281e+07	1.85489e+07	1.59155e+07	1.93989e+07	2.20033e+07	2.10481e+07	22432605	2.87945e+07
335000000	9572925	8.95392e+06	1.01517e+07	1.02532e+07	1.00444e+07	1.05392e+07	1.03806e+07	8.93412e+06	2.46294e+07	1.40796e+07	1.352e+07	1.44827e+07	1.15409e+07	1.13634e+07	11637467	11530572	9.86965e+06	12090132	1.16139e+07	1.14759e+07	1.27083e+07	1.64033e+07	1.56942e+07	18440498	5.6589e+06	5182843	6.15474e+06	1.34194e+07	1.22503e+07	1.41401e+07	1.30745e+07	1.29579e+07	1.3641e+07	4.79561e+06	4.36118e+06	5.32659e+06	2.60487e+07	2.54683e+07	2.64713e+07	2.88769e+07	27988580	3.0643e+07	1.85526e+07	1.59179e+07	1.94033e+07	2.20085e+07	21052871	2.24384e+07	2.88037e+07
336000000	9.57389e+06	8.95462e+06	1.0153e+07	1.02542e+07	1.00453e+07	1.05403e+07	1.03819e+07	8.9349e+06	2.46569e+07	1.40816e+07	1.35217e+07	1.44853e+07	1.15421e+07	1.13643e+07	1.16387e+07	1.15319e+07	9.87016e+06	12091745	11615268	1.14771e+07	1.27118e+07	1.64064e+07	1.56968e+07	1.84473e+07	5659258	5.18306e+06	6.15527e+06	1.34213e+07	1.22516e+07	1.41429e+07	1.30763e+07	12959595	1.36432e+07	4.79589e+06	4.36138e+06	5.32702e+06	2.6056e+07	25475137	2.64793e+07	2.88867e+07	2.79972e+07	3.06578e+07	1.85562e+07	15920208	1.94076e+07	2.20137e+07	2.10577e+07	2.24442e+07	28812914
337000000	9.57485e+06	8.95531e+06	1.01543e+07	1.02552e+07	1.00463e+07	1.05414e+07	10383255	8.93567e+06	2.46843e+07	14083517	1.35233e+07	1.44878e+07	1.15432e+07	1.13652e+07	1.16398e+07	1.15333e+07	9870666	1.20933e+07	1.16166e+07	1.14784e+07	1.27152e+07	1.64094e+07	15699386	1.84541e+07	5.65961e+06	5.18328e+06	6.15579e+06	1.34233e+07	1.22529e+07	14145730	1.30781e+07	1.29613e+07	1.36453e+07	4.79617e+06	4.36158e+06	5.32745e+06	26063297	2.5482e+07	2.64872e+07	2.88964e+07	2.80059e+07	3.06725e+07	1.85598e+07	1.59226e+07	1.9412e+07	2.20189e+07	2.10624e+07	2.245e+07	2.8822e+07
338000000	9.5758e+06	8.956e+06	1.01556e+07	1.02562e+07	1.00472e+07	1.05424e+07	1.03846e+07	8.93644e+06	2.47117e+07	1.40855e+07	1.35249e+07	1.44904e+07	1.15444e+07	1.13661e+07	1.1641e+07	1.15347e+07	9871169	1.20949e+07	1.16179e+07	11479669	1.27187e+07	1.64125e+07	1.5702e+07	1.84609e+07	5.65996e+06	5.1835e+06	6.1563e+06	1.34251e+07	1.22541e+07	14148505	1.30799e+07	1.2963e+07	1.36475e+07	4.79644e+06	4.36177e+06	5.32788e+06	2.60706e+07	2.54887e+07	2.64951e+07	28906052	2.80144e+07	3.06872e+07	1.85634e+07	1.59249e+07	1.94163e+07	2.20241e+07	2.10671e+07	2.24557e+07	2.88311e+07
339000000	9.57675e+06	8.95669e+06	1.0157e+07	1.02572e+07	1.00481e+07	1.05435e+07	1.03859e+07	8.9372e+06	2.47389e+07	1.40874e+07	1.35266e+07	1.44929e+07	1.15455e+07	1.1367e+07	1.16422e+07	1.1536e+07	9.87167e+06	1.20965e+07	1.16193e+07	11480918	1.27221e+07	1.64155e+07	1.57045e+07	1.84677e+07	5.66031e+06	5.18371e+06	6.15682e+06	1.3427e+07	1.22554e+07	1.41513e+07	1.30817e+07	1.29647e+07	1.36497e+07	4.79672e+06	4.36197e+06	5.32831e+06	2.60778e+07	2.54955e+07	2.65029e+07	2.89157e+07	2.8023e+07	30701831	1.8567e+07	1.59272e+07	19420619	2.20292e+07	2.10718e+07	22461382	2.88402e+07
340000000	9.57769e+06	8957369	1.01583e+07	1.02582e+07	1.00491e+07	1.05446e+07	1.03872e+07	8.93796e+06	2.47661e+07	1.40893e+07	1.35282e+07	1.44954e+07	1.15467e+07	1.13679e+07	1.16433e+07	11537339	9.87217e+06	1.20981e+07	1.16206e+07	1.14822e+07	1.27255e+07	1.64185e+07	1.57071e+07	1.84744e+07	5.66066e+06	5.18393e+06	6.15733e+06	1.34289e+07	1.22566e+07	1.4154e+07	13083459	1.29664e+07	1.36518e+07	4.79699e+06	4.36216e+06	5.32873e+06	2.6085e+07	2.55022e+07	26510701	2.89252e+07	2.80314e+07	3.07164e+07	1.85706e+07	1.59295e+07	1.94249e+07	2.20343e+07	21076515	2.2467e+07	2.88492e+07
341000000	9578625	8.95805e+06	1.01596e+07	1.02592e+07	1.005e+07	1.05456e+07	1.03885e+07	8.93871e+06	2.47932e+07	1.40912e+07	1.35298e+07	1.44979e+07	1.15478e+07	1.13688e+07	1.16445e+07	1.15387e+07	9872659	1.20997e+07	1.16219e+07	1.14834e+07	1.27289e+07	16421520	1.57096e+07	1.84811e+07	5.66101e+06	5.18414e+06	6.15784e+06	1.34308e+07	1.22578e+07	1.41567e+07	1.30852e+07	1.29681e+07	1.3654e+07	4797262	4.36235e+06	5.32915e+06	2.60921e+07	2.55089e+07	2.65185e+07	2.89347e+07	2.80399e+07	3.07309e+07	1.85741e+07	1.59317e+07	1.94292e+07	2.20394e+07	2.10812e+07	22472682	2.88581e+07
342000000	9.57956e+06	8.95872e+06	1.01609e+07	1.02602e+07	1.00509e+07	1.05467e+07	1.03897e+07	8.93946e+06	2.48202e+07	1.40931e+07	1.35313e+07	1.45004e+07	11548964	1.13697e+07	1.16456e+07	1.154e+07	9.87315e+06	1.21012e+07	1.16232e+07	1.14846e+07	1.27323e+07	1.64245e+07	1.57121e+07	18487771	5.66135e+06	5.18435e+06	6.15835e+06	1.34326e+07	1.22591e+07	1.41595e+07	1.3087e+07	1.29698e+07	1.36561e+07	4797532	4.36254e+06	5.32957e+06	2.60992e+07	2.55155e+07	26526169	2.89442e+07	2.80483e+07	3.07453e+07	1.85776e+07	1.5934e+07	1.94334e+07	2.20444e+07	21085795	2.24783e+07	2.8867e+07
343000000	9.58048e+06	8.95939e+06	1.01621e+07	1.02611e+07	1.00518e+07	1.05477e+07	1.0391e+07	8940208	2.48471e+07	1.4095e+07	1.35329e+07	1.45028e+07	1.15501e+07	1.13706e+07	1.16468e+07	1.15413e+07	9.87364e+06	1.21028e+07	11624517	11485844	1.27357e+07	1.64275e+07	1.57146e+07	1.84944e+07	5.66169e+06	5.18456e+06	6.15885e+06	1.34345e+07	1.22603e+07	1.41622e+07	1.30887e+07	1.29714e+07	1.36582e+07	4.7978e+06	4.36273e+06	5.32999e+06	2.61063e+07	2.55221e+07	2.65338e+07	2.89536e+07	2.80566e+07	3.07597e+07	1.85812e+07	1.59362e+07	1.94376e+07	2.20495e+07	2.10904e+07	2.24839e+07	2.88758e+07
344000000	9.5814e+06	8.96006e+06	10163426	1.02621e+07	1.00528e+07	1.05487e+07	1.03923e+07	8.94095e+06	2.4874e+07	1.40969e+07	1.35345e+07	1.45053e+07	1.15512e+07	1.13715e+07	1.16479e+07	1.15426e+07	9.87412e+06	1.21043e+07	11625809	1.14871e+07	1.2739e+07	1.64304e+07	15717127	1.8501e+07	5.66203e+06	5.18477e+06	6.15935e+06	1.34363e+07	1.22615e+07	1.41649e+07	1.30904e+07	1.29731e+07	1.36603e+07	4.79807e+06	4.36292e+06	5.3304e+06	26113321	2.55287e+07	2.65415e+07	2.8963e+07	2.80649e+07	3.07741e+07	1.85846e+07	1.59383e+07	1.94418e+07	2.20545e+07	2.1095e+07	22489412	2.88846e+07
345000000	9.58232e+06	8.96072e+06	1.01647e+07	1.02631e+07	1.00537e+07	10549762	1.03935e+07	8.94169e+06	2.49008e+07	1.40988e+07	1.35361e+07	1.45077e+07	1.15523e+07	1.13723e+07	1.16491e+07	1.15439e+07	9.8746e+06	1.21059e+07	1.16271e+07	1.14883e+07	1.27424e+07	1.64334e+07	1.57196e+07	1.85076e+07	5.66237e+06	5.18498e+06	6.15985e+06	1.34381e+07	1.22627e+07	1.41675e+07	1.30922e+07	1.29747e+07	1.36624e+07	4.79833e+06	4.36311e+06	5.33081e+06	2.61203e+07	2.55353e+07	2.65491e+07	2.89723e+07	2.80732e+07	3.07883e+07	1.85881e+07	1.59405e+07	1.9446e+07	2.20594e+07	2.10995e+07	22494931	2.88934e+07
346000000	9.58323e+06	8.96138e+06	10165964	1.0264e+07	1.00546e+07	1.05508e+07	1.03948e+07	8942420	2.49275e+07	1.41007e+07	1.35376e+07	1.45101e+07	1.15534e+07	1.13732e+07	11650173	1.15452e+07	9.87508e+06	1.21074e+07	1.16284e+07	1.14895e+07	1.27457e+07	1.64363e+07	1.57221e+07	1.85142e+07	5.66271e+06	5.18519e+06	6.16034e+06	1.34399e+07	1.22639e+07	1.41702e+07	1.30939e+07	1.29764e+07	1.36645e+07	4.7986e+06	4.36329e+06	5331220	2.61273e+07	25541760	2.65566e+07	2.89816e+07	2.80814e+07	3.08025e+07	1.85916e+07	1.59427e+07	1.94501e+07	2.20644e+07	2.11041e+07	2.25004e+07	2.89021e+07
347000000	9.58414e+06	8.96204e+06	1.01672e+07	1.0265e+07	1.00555e+07	1.05518e+07	1.0396e+07	8943149	2.49541e+07	1.41025e+07	1.35392e+07	1.45126e+07	1.15545e+07	1.13741e+07	1.16513e+07	1.15465e+07	9.87556e+06	12108904	1.16296e+07	1.14907e+07	1.2749e+07	16439188	1.57245e+07	1.85207e+07	5.66304e+06	5.18539e+06	6.16084e+06	1.34417e+07	1.22651e+07	1.41728e+07	1.30956e+07	1.2978e+07	1.36665e+07	4798859	4.36348e+06	5331627	26134208	2.55482e+07	2.65642e+07	2.89908e+07	2.80896e+07	3.08167e+07	1.8595e+07	1.59448e+07	1.94542e+07	22069297	2.11086e+07	2.25059e+07	2.89108e+07
348000000	9.58504e+06	8.96269e+06	1.01685e+07	1.02659e+07	10056344	1.05528e+07	10397274	8.94387e+06	2.49806e+07	1.41044e+07	1.35407e+07	1.4515e+07	1.15556e+07	1.13749e+07	1.16524e+07	1.15478e+07	9.87603e+06	1.21104e+07	11630906	1.14918e+07	1.27523e+07	1.64421e+07	1.5727e+07	1.85272e+07	5.66337e+06	5185598	6.16133e+06	1.34435e+07	1.22663e+07	1.41755e+07	1.30973e+07	1.29796e+07	1.36686e+07	4799120	4.36366e+06	5.33203e+06	2.61411e+07	2.55547e+07	2.65716e+07	2.9e+07	28097771	3.08308e+07	1.85984e+07	1.5947e+07	1.94583e+07	2.20742e+07	2.1113e+07	2.25113e+07	28919427
349000000	9.58593e+06	8.96334e+06	1.01697e+07	1.02669e+07	1.00572e+07	1.05538e+07	1.03985e+07	8944595	2.50071e+07	1.41062e+07	1.35422e+07	1.45174e+07	1.15567e+07	1.13758e+07	11653504	1.15491e+07	9.8765e+06	1.21119e+07	1.16322e+07	1.1493e+07	1.27556e+07	1.6445e+07	1.57294e+07	1.85337e+07	5.6637e+06	5.1858e+06	6.16182e+06	1.34453e+07	1.22674e+07	1.41781e+07	1.30989e+07	1.29812e+07	1.36706e+07	4.79938e+06	4.36385e+06	5.33243e+06	2.6148e+07	2.55611e+07	2.65791e+07	2.90091e+07	2.81059e+07	3.08448e+07	1.86018e+07	1.59491e+07	1.94624e+07	2.20791e+07	2.11175e+07	2.25167e+07	2.8928e+07
350000000	9.58682e+06	8.96398e+06	1.0171e+07	1.02678e+07	1.00581e+07	1.05548e+07	10399733	8945312	2.50335e+07	1.4108e+07	1.35438e+07	1.45197e+07	1.15578e+07	1.13766e+07	1.16546e+07	1.15503e+07	9.87696e+06	1.21134e+07	1.16334e+07	1.14942e+07	1.27589e+07	1.64478e+07	1.57318e+07	1.85401e+07	5.66403e+06	5.186e+06	6.16231e+06	1.34471e+07	1.22686e+07	1.41807e+07	1.31006e+07	1.29828e+07	1.36727e+07	4.79964e+06	4.36403e+06	5.33283e+06	2.61548e+07	2.55674e+07	2.65865e+07	29018202	28113933	3.08588e+07	1.86052e+07	1.59512e+07	1.94665e+07	2.20839e+07	2.11219e+07	2.25221e+07	2.89366e+07
351000000	9.58771e+06	8.96462e+06	1.01722e+07	1.02688e+07	1.0059e+07	1.05558e+07	1.0401e+07	8946025	2.50598e+07	1.41098e+07	1.35453e+07	1.45221e+07	1.15589e+07	1.13775e+07	1.16557e+07	1.15516e+07	9.87743e+06	1.21149e+07	1.16347e+07	1.14954e+07	1.27621e+07	1.64507e+07	1.57342e+07	1.85466e+07	5.66436e+06	5186205	6.1628e+06	1.34488e+07	1.22698e+07	1.41833e+07	1.31023e+07	1.29844e+07	1.36747e+07	4.79989e+06	4.36421e+06	5.33323e+06	2.61616e+07	2.55738e+07	2.65939e+07	2.90272e+07	28121953	3.08727e+07	1.86085e+07	1.59534e+07	1.94705e+07	2.20887e+07	2.11264e+07	22527454	2.89451e+07
352000000	9.58859e+06	8.96526e+06	1.01734e+07	1.02697e+07	1.00599e+07	1.05568e+07	1.04022e+07	8.94673e+06	25085998	1.41116e+07	1.35468e+07	1.45245e+07	1.15599e+07	11378287	1.16568e+07	1.15528e+07	9.87789e+06	1.21164e+07	1.16359e+07	1.14965e+07	1.27654e+07	16453485	1.57366e+07	1.85529e+07	5.66468e+06	5186405	6.16328e+06	1.34506e+07	1.22709e+07	1.41859e+07	1.31039e+07	1.2986e+07	1.36767e+07	4.80015e+06	4364392	5.33363e+06	2.61683e+07	2.55801e+07	2.66012e+07	2.90362e+07	2.81299e+07	3.08866e+07	1.86119e+07	1.59555e+07	1.94745e+07	2.20935e+07	21130741	22532778	2.89535e+07
353000000	9.58947e+06	8.96589e+06	1.01746e+07	1.02706e+07	1.00607e+07	10557801	1.04034e+07	8.94744e+06	2.51121e+07	14113429	1.35483e+07	1.45268e+07	1.1561e+07	11379116	1.16579e+07	1.15541e+07	9.87835e+06	1.21178e+07	1.16371e+07	1.14977e+07	1.27686e+07	1.64563e+07	1.5739e+07	1.85593e+07	5.66501e+06	5186604	6.16376e+06	1.34524e+07	12272087	1.41885e+07	1.31056e+07	12987590	1.36787e+07	4800403	4.36457e+06	5.33402e+06	26175029	2.55864e+07	2.66085e+07	2.90452e+07	2.81379e+07	3.09004e+07	1.86152e+07	1.59575e+07	1.94785e+07	2.20983e+07	2.11351e+07	2.25381e+07	2.89619e+07
354000000	9.59034e+06	8.96653e+06	1.01758e+07	10271521	1.00616e+07	1.05588e+07	1.04046e+07	8.94814e+06	2.51382e+07	1.41152e+07	1.35498e+07	1.45291e+07	1.15621e+07	1.13799e+07	1.16589e+07	1.15553e+07	9.8788e+06	1.21193e+07	1.16383e+07	1.14988e+07	1.27719e+07	16459099	1.57413e+07	1.85657e+07	5.66533e+06	5.1868e+06	6.16424e+06	1.34541e+07	1.22732e+07	1.4191e+07	1.31072e+07	1.29892e+07	1.36807e+07	4.80066e+06	4.36475e+06	5.33441e+06	2.61817e+07	25592616	2.66157e+07	2.90541e+07	2.81458e+07	30914135	1.86185e+07	1.59596e+07	1.94825e+07	2.2103e+07	2.11394e+07	2.25433e+07	2.89703e+07
355000000	9.5912e+06	8967152	1.01771e+07	1.02724e+07	1.00624e+07	1.05598e+07	1.04058e+07	8.94884e+06	2.51642e+07	1.4117e+07	1.35512e+07	14531460	1.15631e+07	1.13808e+07	1.166e+07	1.15565e+07	9.87926e+06	1.21207e+07	1.16396e+07	1.15e+07	1.27751e+07	16461884	1.57437e+07	1.8572e+07	5665646	5.187e+06	6.16471e+06	1.34558e+07	12274373	14193565	1.31088e+07	1.29907e+07	1.36827e+07	4.80091e+06	4.36493e+06	5.3348e+06	2.61884e+07	2.55988e+07	2.6623e+07	2.9063e+07	2.81536e+07	3.09278e+07	1.86218e+07	1.59617e+07	1.94865e+07	2.21077e+07	2.11438e+07	22548589	2.89786e+07
356000000	9.59207e+06	8.96778e+06	1.01783e+07	1.02733e+07	10063292	1.05607e+07	1.0407e+07	8.94953e+06	2.51901e+07	1.41188e+07	13552720	1.45338e+07	1.15642e+07	1.13816e+07	1.16611e+07	1.15578e+07	9.87971e+06	1.21222e+07	1.16408e+07	1.15011e+07	1.27783e+07	1.64647e+07	1.5746e+07	1.85783e+07	5.66596e+06	5.18719e+06	6.16518e+06	1.34575e+07	1.22755e+07	1.41961e+07	1.31105e+07	1.29923e+07	1.36846e+07	4.80116e+06	4.3651e+06	5.33519e+06	2.6195e+07	2.5605e+07	2.66302e+07	29071815	28161454	30941478	1.86251e+07	1.59637e+07	1.94904e+07	2.21124e+07	2.11481e+07	2.25538e+07	2.89869e+07
357000000	9.59292e+06	8.9684e+06	1.01794e+07	1.02742e+07	1.00641e+07	1.05617e+07	1.04081e+07	8.95022e+06	2.5216e+07	1.41205e+07	1.35542e+07	1.45361e+07	1.15652e+07	1.13824e+07	1.16621e+07	1.1559e+07	9.88015e+06	1.21236e+07	1.1642e+07	1.15022e+07	1.27815e+07	1.64674e+07	1.57483e+07	1.85845e+07	5.66628e+06	5.18739e+06	6.16565e+06	1.34593e+07	1.22766e+07	1.41986e+07	1.31121e+07	1.29938e+07	1.36866e+07	4.8014e+06	4.36528e+06	5335576	2.62016e+07	25611157	2.66373e+07	2.90806e+07	2.81692e+07	3.09551e+07	1.86283e+07	15965778	1.94943e+07	22117087	2.11523e+07	2.2559e+07	2.89952e+07
358000000	9.59378e+06	8.96901e+06	1.01806e+07	1.02751e+07	10064982	1.05626e+07	1.04093e+07	8.95091e+06	2.52418e+07	1.41223e+07	1.35556e+07	1.45384e+07	1.15662e+07	1.13832e+07	1.16632e+07	1.15602e+07	9.8806e+06	1.21251e+07	1.16432e+07	11503374	1.27847e+07	1.64702e+07	1.57507e+07	1.85908e+07	5.66659e+06	5187582	6.16612e+06	1.3461e+07	1.22778e+07	14201124	1.31137e+07	1.29953e+07	1.36886e+07	4801651	4365453	5.33596e+06	2.62081e+07	25617275	2.66444e+07	29089339	2.8177e+07	3.09686e+07	1.86315e+07	1.59678e+07	1.94982e+07	2.21217e+07	21156599	2.25642e+07	29003376
359000000	9.59463e+06	8.96963e+06	10181817	1.0276e+07	1.00658e+07	1.05636e+07	1.04105e+07	8.95159e+06	2.52674e+07	1.4124e+07	1.35571e+07	1.45406e+07	1.15673e+07	1.1384e+07	1.16642e+07	1.15614e+07	9.88104e+06	1.21265e+07	1.16444e+07	1.15045e+07	1.27878e+07	1.64729e+07	1.5753e+07	1.8597e+07	5.66691e+06	5.18777e+06	6.16659e+06	1.34627e+07	1.22789e+07	1.42036e+07	1.31153e+07	1.29969e+07	1.36905e+07	4.8019e+06	4.36563e+06	5.33634e+06	26214627	2.56234e+07	2.66515e+07	2.9098e+07	2.81847e+07	3.09821e+07	1.86348e+07	1.59698e+07	1.95021e+07	2.21264e+07	2.11608e+07	2.25693e+07	29011544
360000000	9.59547e+06	8.97024e+06	1.0183e+07	1.02769e+07	1.00667e+07	1.05646e+07	10411638	8952269	2.52931e+07	1.41257e+07	1.35585e+07	14542893	1.15683e+07	1.13848e+07	1.16653e+07	1.15626e+07	9.88148e+06	1.21279e+07	1.16455e+07	1.15056e+07	1.2791e+07	1.64756e+07	1.57552e+07	1.86032e+07	5.66722e+06	5.18797e+06	6.16705e+06	1.34644e+07	1.228e+07	1.42061e+07	1.31169e+07	12998386	13692422	4.80214e+06	4.3658e+06	5.33672e+06	2.62211e+07	25629419	2.66586e+07	2.91067e+07	2.81924e+07	3.09955e+07	1.8638e+07	1.59718e+07	1.95059e+07	2.2131e+07	2.1165e+07	2.25744e+07	2.90197e+07
361000000	9.59631e+06	8.97084e+06	1.01842e+07	1.02778e+07	1.00675e+07	10565496	10412794	8.95294e+06	2.53186e+07	1.41274e+07	1.356e+07	14545146	1.15693e+07	1.13856e+07	1.16663e+07	1.15638e+07	9.88192e+06	1.21293e+07	1.16467e+07	1.15067e+07	1.27941e+07	1.64783e+07	15757518	1.86094e+07	5.66753e+06	5.18816e+06	6.16751e+06	1.3466e+07	1.22811e+07	1.42086e+07	1.31184e+07	1.29999e+07	1.36943e+07	4.80238e+06	4.36597e+06	5.3371e+06	26227564	2.56354e+07	2.66656e+07	2.91153e+07	2.82e+07	31008889	1.86412e+07	1.59738e+07	1.95098e+07	2.21355e+07	2.11692e+07	2.25795e+07	29027760
362000000	9.59714e+06	8.97145e+06	1.01853e+07	10278691	1.00683e+07	1.05664e+07	1.04139e+07	8.95362e+06	2.53441e+07	1.41292e+07	1.35614e+07	14547388	1.15703e+07	1.13864e+07	1.16673e+07	1.1565e+07	9.88235e+06	1.21307e+07	1.16479e+07	1.15078e+07	1.27973e+07	1.6481e+07	1.57598e+07	1.86155e+07	5.66783e+06	5.18835e+06	6.16797e+06	1.34677e+07	1.22822e+07	1.4211e+07	1.312e+07	1.30014e+07	1.36963e+07	4.80263e+06	4.36614e+06	5.33747e+06	2.6234e+07	2.56414e+07	2.66725e+07	2.91239e+07	28207577	3.10222e+07	1.86443e+07	1.59758e+07	1.95136e+07	2.21401e+07	2.11734e+07	2.25846e+07	2.90358e+07
363000000	9.59797e+06	8.97205e+06	1.01865e+07	1.02796e+07	1.00691e+07	1.05674e+07	1.04151e+07	8.95428e+06	2.53695e+07	1.41309e+07	1.35628e+07	1.45496e+07	1.15713e+07	1.13871e+07	1.16683e+07	1.15662e+07	9.88278e+06	1.21321e+07	1.16491e+07	1.15089e+07	1.28004e+07	1.64837e+07	1.5762e+07	1.86216e+07	5.66814e+06	5.18853e+06	6.16842e+06	1.34694e+07	1.22833e+07	1.42135e+07	1.31216e+07	1.30029e+07	1.36982e+07	4.80287e+06	4.36631e+06	5.33784e+06	2.62404e+07	2.56474e+07	2.66795e+07	2.91324e+07	2.82151e+07	3.10355e+07	1.86475e+07	1.59778e+07	1.95174e+07	2.21446e+07	2.11775e+07	2.25896e+07	2.90438e+07
364000000	9.5988e+06	8.97264e+06	1.01876e+07	1.02804e+07	1.00699e+07	1.05683e+07	1.04162e+07	8.95495e+06	2.53948e+07	1.41325e+07	1.35642e+07	1.45518e+07	11572349	1.13879e+07	1.16694e+07	1.15673e+07	9.88321e+06	1.21335e+07	1.16502e+07	1.151e+07	12803497	1.64863e+07	1.57643e+07	1.86277e+07	5.66844e+06	5.18872e+06	6.16887e+06	1.3471e+07	1.22844e+07	1.42159e+07	1.31231e+07	1.30044e+07	1.37e+07	4.8031e+06	4.36648e+06	5.33822e+06	2.62467e+07	2.56533e+07	2.66864e+07	2.91409e+07	2.82227e+07	3.10487e+07	1.86506e+07	1.59798e+07	1.95212e+07	2.21491e+07	2.11817e+07	2.25946e+07	2.90518e+07
365000000	9.59962e+06	8.97324e+06	1.01888e+07	1.02813e+07	1.00708e+07	1.05692e+07	1.04174e+07	8.95561e+06	2.54201e+07	1.41342e+07	1.35656e+07	1.4554e+07	11573347	1.13887e+07	1.16704e+07	1.15685e+07	9.88364e+06	1.21349e+07	1.16514e+07	1.15111e+07	1.28066e+07	1.6489e+07	1.57665e+07	1.86338e+07	5668747	5.18891e+06	6.16932e+06	1.34727e+07	1.22854e+07	1.42183e+07	1.31247e+07	13005856	1.37019e+07	4803342	4.36665e+06	5.33858e+06	2.62531e+07	2.56593e+07	2.66933e+07	2.91494e+07	2.82301e+07	31061866	1.86537e+07	1.59817e+07	1.95249e+07	2.21536e+07	21185776	2.25996e+07	2.90597e+07
366000000	9.60044e+06	8.97383e+06	1.01899e+07	1.02822e+07	1.00716e+07	1.05701e+07	1.04185e+07	8.95627e+06	2.54452e+07	1.41359e+07	1.3567e+07	1.45562e+07	1.15743e+07	1.13895e+07	11671382	1.15697e+07	9.88406e+06	1.21362e+07	1.16525e+07	1.15122e+07	1.28097e+07	16491586	1.57687e+07	1.86398e+07	5669048	5.18909e+06	6.16977e+06	1.34743e+07	1.22865e+07	1.42207e+07	1.31262e+07	1.30073e+07	13703796	4.80358e+06	4.36681e+06	5338952	2.62594e+07	2.56651e+07	2.67001e+07	2.91578e+07	2.82376e+07	3.1075e+07	1.86568e+07	1.59837e+07	1.95287e+07	2.21581e+07	2.11899e+07	2.26046e+07	2.90676e+07
367000000	9.60125e+06	8.97441e+06	1.01911e+07	1.0283e+07	1.00724e+07	1.05711e+07	10419604	8.95692e+06	2.54704e+07	1.41376e+07	1.35684e+07	1.45584e+07	1.15753e+07	1.13902e+07	1.16724e+07	1.15708e+07	9884482	1.21376e+07	1.16537e+07	1.15132e+07	1.28128e+07	1.64942e+07	1.57709e+07	1.86459e+07	5.66935e+06	5.18928e+06	6.17022e+06	13475925	1.22876e+07	14223144	1.31277e+07	1.30088e+07	1.37057e+07	4.80381e+06	4.36698e+06	5.33932e+06	2.62656e+07	2.5671e+07	26706934	2.91661e+07	2.8245e+07	3.1088e+07	1.86599e+07	1.59856e+07	1.95324e+07	2.21625e+07	2.11939e+07	2.26095e+07	2.90755e+07
368000000	9.60206e+06	8.975e+06	1.01922e+07	1.02839e+07	1.00732e+07	1.0572e+07	1.04207e+07	8.95757e+06	2.54954e+07	1.41392e+07	1.35698e+07	1.45606e+07	1.15763e+07	1.1391e+07	1.16734e+07	1.1572e+07	9.8849e+06	1.21389e+07	1.16548e+07	1.15143e+07	1.28158e+07	1.64968e+07	1.57731e+07	1.86519e+07	5.66965e+06	5.18946e+06	6.17066e+06	1.34775e+07	12288652	1.42255e+07	13129263	1.30102e+07	1.37075e+07	4.80405e+06	4.36715e+06	5.33968e+06	2.62718e+07	2.56768e+07	2.67137e+07	2.91745e+07	2.82524e+07	3.11011e+07	1.8663e+07	1.59876e+07	1.95361e+07	2.21669e+07	21197967	22614426	2.90833e+07
369000000	9.60287e+06	8.97558e+06	1.01933e+07	1.02847e+07	10073959	1.05729e+07	1.04218e+07	8.95822e+06	2.55204e+07	1.41409e+07	1.35712e+07	1.45628e+07	1.15773e+07	11391737	1.16744e+07	1.15731e+07	9.88532e+06	1.21403e+07	1.16559e+07	1.15154e+07	12818868	1.64994e+07	1.57753e+07	1.86578e+07	5.66994e+06	5189641	6.1711e+06	1.34792e+07	1.22897e+07	14227908	1.31308e+07	1.30117e+07	1.37094e+07	4.80428e+06	4.36731e+06	5340042	2.62781e+07	2.56826e+07	2.67205e+07	2.91828e+07	2.82597e+07	3.1114e+07	1.86661e+07	1.59895e+07	19539779	2.21713e+07	21201990	2.26193e+07	2.90912e+07
370000000	9.60367e+06	8.97616e+06	1.01944e+07	1.02856e+07	1.00747e+07	1.05738e+07	1.04229e+07	8.95886e+06	2.55452e+07	1.41425e+07	1.35725e+07	1.45649e+07	1.15783e+07	1.13925e+07	1.16754e+07	1.15742e+07	9.88573e+06	1.21416e+07	1.16571e+07	1.15164e+07	1.28219e+07	1.6502e+07	1.57775e+07	1.86638e+07	5670236	5.18982e+06	6.17154e+06	1.34808e+07	1.22908e+07	1.42303e+07	1.31323e+07	1.30131e+07	1.37112e+07	4.80451e+06	4.36747e+06	5.3404e+06	2.62842e+07	2.56884e+07	2.67272e+07	2.9191e+07	2.8267e+07	3.11269e+07	1.86691e+07	1.59914e+07	1.95434e+07	2.21757e+07	2.1206e+07	2.26242e+07	2.90991e+07
371000000	9.60446e+06	8.97673e+06	1.01955e+07	1.02864e+07	1.00755e+07	1.05747e+07	1.0424e+07	8.9595e+06	2.55701e+07	14144158	1.35739e+07	1.45671e+07	1.15792e+07	1.13932e+07	1.16763e+07	1.15754e+07	9.88614e+06	12142969	1.16582e+07	1.15175e+07	12824937	1.65045e+07	1.57796e+07	1.86697e+07	5.67053e+06	5.19e+06	6.17197e+06	1.34824e+07	1.22918e+07	1.42326e+07	1.31338e+07	1.30146e+07	1.3713e+07	4.80474e+06	4.36764e+06	5.34076e+06	2.62904e+07	2.56941e+07	2.67339e+07	2.91992e+07	2.82743e+07	3.11398e+07	1.86721e+07	1.59933e+07	1.95471e+07	2.218e+07	2.121e+07	2.2629e+07	2.91069e+07
372000000	9605254	8.9773e+06	1.01966e+07	1.02872e+07	1.00763e+07	1.05756e+07	1.04251e+07	8.96014e+06	2.55948e+07	1.41458e+07	1.35753e+07	1.45692e+07	1.15802e+07	11393976	1.16773e+07	1.15765e+07	9.88655e+06	1.21443e+07	1.16593e+07	1.15185e+07	1.2828e+07	1.65071e+07	1.57818e+07	1.86756e+07	5.67082e+06	5.19018e+06	6.17241e+06	1.34839e+07	1.22929e+07	1.4235e+07	1.31353e+07	1.3016e+07	1.37148e+07	4.80497e+06	4.3678e+06	5341115	26296481	2.56998e+07	2.67405e+07	2.92074e+07	2.82815e+07	3.11526e+07	1.86751e+07	1.59952e+07	1.95507e+07	2.21844e+07	2.12139e+07	2.26339e+07	2.91147e+07
373000000	9.60604e+06	8977873	1.01977e+07	1.02881e+07	1.00771e+07	1.05764e+07	1.04262e+07	8.96077e+06	2.56195e+07	1.41474e+07	1.35766e+07	1.45713e+07	1.15811e+07	1.13947e+07	11678285	1.15776e+07	9.88696e+06	1.21456e+07	1.16604e+07	1.15195e+07	1.2831e+07	1.65096e+07	1.57839e+07	1.86815e+07	5.67111e+06	5.19036e+06	6172840	1.34855e+07	1.22939e+07	1.42373e+07	1.31368e+07	13017411	1.37166e+07	4.8052e+06	4.36796e+06	5341469	2.63026e+07	2.57055e+07	26747122	2.92155e+07	2.82887e+07	3.11654e+07	1.86781e+07	1.59971e+07	1.95543e+07	2.21887e+07	2.12179e+07	2.26386e+07	2.91225e+07
374000000	9606826	8.97844e+06	1.01988e+07	10288889	10077870	1.05773e+07	1.04273e+07	8.9614e+06	2.56441e+07	1.4149e+07	1.35779e+07	1.45735e+07	1.15821e+07	1.13954e+07	1.16793e+07	1.15787e+07	9887365	1.21469e+07	1.16615e+07	1.15206e+07	1.2834e+07	1.65122e+07	1.57861e+07	1.86874e+07	5.6714e+06	5.19054e+06	6.17327e+06	1.34871e+07	1.22949e+07	1.42396e+07	1.31382e+07	1.30188e+07	1.37184e+07	4.80543e+06	4.36812e+06	5.34182e+06	2.63086e+07	2.57111e+07	2.67537e+07	2.92236e+07	2.82959e+07	3.11781e+07	1.86811e+07	1.59989e+07	1.95579e+07	2.2193e+07	2.12218e+07	2.26434e+07	2.91302e+07
375000000	9607606	8.979e+06	1.01999e+07	1.02897e+07	1.00786e+07	1.05782e+07	1.04284e+07	8.96203e+06	2.56686e+07	1.41506e+07	1.35793e+07	1.45756e+07	1.1583e+07	11396177	1.16802e+07	11579846	9.88777e+06	1.21482e+07	1.16626e+07	11521609	1.28369e+07	1.65147e+07	1.57882e+07	1.86932e+07	5.67169e+06	5.19071e+06	6.1737e+06	1.34886e+07	1.22959e+07	1.42419e+07	1.31397e+07	1.30202e+07	1.37202e+07	4.80565e+06	4.36828e+06	5.34217e+06	26314645	2.57168e+07	2.67603e+07	2.92317e+07	2.8303e+07	3.11907e+07	18684093	1.60008e+07	1.95615e+07	22197217	2.12257e+07	2.26482e+07	2.91379e+07
376000000	9.60838e+06	8979562	1.0201e+07	1.02905e+07	1.00794e+07	1.05791e+07	1.04294e+07	8.96265e+06	2.56931e+07	1.41522e+07	13580608	14577665	1.1584e+07	1.13969e+07	1.16812e+07	1.15809e+07	9.88817e+06	1.21495e+07	1.16637e+07	1.15226e+07	1.28399e+07	1.65172e+07	1.57903e+07	1.8699e+07	5.67197e+06	5.19089e+06	6.17412e+06	1.34902e+07	12296969	1.42442e+07	1.31412e+07	1.30216e+07	1.3722e+07	4.80587e+06	4.36844e+06	5342520	2.63206e+07	2.57224e+07	2.67668e+07	2.92397e+07	28310096	3.12034e+07	1.8687e+07	1.60026e+07	1.95651e+07	2.22015e+07	2.12296e+07	2.26529e+07	2.91456e+07
377000000	9.60915e+06	8.98012e+06	1.02021e+07	1.02913e+07	1.00802e+07	1.05799e+07	1.04305e+07	8.96327e+06	2.57175e+07	1.41538e+07	13581928	1.45798e+07	1.15849e+07	1.13976e+07	1.16821e+07	1.1582e+07	9.88857e+06	1.21508e+07	1.16648e+07	1.15237e+07	1.28429e+07	1.65197e+07	1.57924e+07	1.87048e+07	5.67226e+06	5.19106e+06	6.17454e+06	1.34917e+07	1.2298e+07	1.42465e+07	1.31426e+07	1.3023e+07	1.37238e+07	4806098	4.36859e+06	5.34287e+06	2.63266e+07	2.57279e+07	2.67733e+07	2.92477e+07	2.83172e+07	3.12159e+07	1.869e+07	1.60045e+07	1.95686e+07	2.22057e+07	2.12335e+07	2.26576e+07	29153215
378000000	9609922	8.98067e+06	1.02031e+07	1.02921e+07	1.00809e+07	10580802	1.04316e+07	8963889	2.57419e+07	1.41554e+07	1.35832e+07	1.45818e+07	1.15859e+07	1.13983e+07	1.16831e+07	1.15831e+07	9.88896e+06	1.21521e+07	1.16658e+07	1.15247e+07	12845831	1.65222e+07	1.57945e+07	1.87106e+07	5.67254e+06	5191237	6.17497e+06	1.34933e+07	1.2299e+07	1.42488e+07	1.31441e+07	1.30244e+07	1.37255e+07	4.80632e+06	4.36875e+06	5.34321e+06	2.63325e+07	2.57335e+07	2.67797e+07	2.92557e+07	2.83242e+07	3.12285e+07	1.86929e+07	1.60063e+07	1.95721e+07	22209891	2.12373e+07	2.26623e+07	2.91608e+07
379000000	9.61069e+06	8.98122e+06	1.02042e+07	1.0293e+07	1.00817e+07	10581661	1.04326e+07	8.9645e+06	2.57661e+07	1.41569e+07	1.35845e+07	1.45839e+07	1.15868e+07	1.13991e+07	1.1684e+07	1.15842e+07	9.88935e+06	1.21534e+07	1.16669e+07	1.15257e+07	1.28488e+07	1.65246e+07	1.57966e+07	1.87163e+07	5.67282e+06	5.19141e+06	6.17538e+06	1.34948e+07	1.23e+07	1.42511e+07	1.31455e+07	1.30258e+07	1.37273e+07	4.80654e+06	4.36891e+06	5.34355e+06	2.63385e+07	25738989	2.67862e+07	2.92636e+07	2.83312e+07	3.12409e+07	1.86958e+07	1.60082e+07	1.95756e+07	2.22141e+07	2.12411e+07	2.2667e+07	2.91684e+07
380000000	9.61145e+06	8.98177e+06	1.02053e+07	10293754	1.00824e+07	1.05825e+07	1.04337e+07	8965114	2.57903e+07	1.41585e+07	1.35858e+07	1.4586e+07	1.15877e+07	1.13998e+07	1.16849e+07	1.15853e+07	9.88975e+06	1.21547e+07	1.1668e+07	1.15267e+07	1.28517e+07	1.65271e+07	1.57986e+07	1.87221e+07	5673099	5.19158e+06	6.1758e+06	13496342	1.2301e+07	1.42533e+07	1.31469e+07	1.30271e+07	1.3729e+07	4.80676e+06	4369061	5.3439e+06	2.63443e+07	2.57445e+07	2.67926e+07	2.92714e+07	2.83381e+07	3.12534e+07	1.86987e+07	1.601e+07	1.95791e+07	2.22182e+07	2.1245e+07	2.26716e+07	2.91759e+07
381000000	9.6122e+06	8.98232e+06	1.02063e+07	1.02946e+07	1.00832e+07	1.05834e+07	1.04347e+07	8.96572e+06	2.58144e+07	1.416e+07	1.35871e+07	1.4588e+07	1.15886e+07	1.14005e+07	1.16859e+07	1.15864e+07	9.89013e+06	1.2156e+07	1.1669e+07	1.15277e+07	1.28546e+07	1.65295e+07	1.58007e+07	1.87278e+07	5.67338e+06	5.19175e+06	6.17621e+06	1.34979e+07	1.2302e+07	1.42556e+07	1.31484e+07	13028503	1.37308e+07	4.80698e+06	4.36922e+06	5.34424e+06	2.63502e+07	2.57499e+07	2.6799e+07	2.92793e+07	2.83451e+07	3.12657e+07	1.87016e+07	1.60118e+07	1.95826e+07	2.22224e+07	2.12487e+07	2.26762e+07	2.91834e+07
382000000	9.61296e+06	8.98286e+06	1.02074e+07	1.02953e+07	1.00839e+07	1.05842e+07	1.04357e+07	8.96633e+06	2.58385e+07	1.41616e+07	13588429	1.459e+07	1.15895e+07	1.14012e+07	1.16868e+07	1.15874e+07	9.89052e+06	1.21572e+07	1.16701e+07	1.15287e+07	1.28575e+07	1.65319e+07	1.58027e+07	1.87334e+07	5673654	5.19192e+06	6.17663e+06	1.34994e+07	1.2303e+07	1.42578e+07	1.31498e+07	1.30299e+07	1.37325e+07	4.8072e+06	4.36937e+06	5.34457e+06	26356027	2.57554e+07	2.68053e+07	2.92871e+07	2.8352e+07	3.12781e+07	1.87045e+07	1.60136e+07	1.95861e+07	2.22265e+07	2.12525e+07	2.26808e+07	2.91908e+07
383000000	9.6137e+06	8.9834e+06	1.02084e+07	10296131	1.00847e+07	1.05851e+07	1.04368e+07	8.96693e+06	2.58625e+07	1.41631e+07	1.35897e+07	1.45921e+07	1.15904e+07	1.14019e+07	1.16877e+07	1.15885e+07	9.89091e+06	1.21585e+07	11671151	1.15297e+07	1.28604e+07	1.65344e+07	1.58048e+07	1.87391e+07	5.67393e+06	5.19209e+06	6.17704e+06	13500867	1.2304e+07	1.426e+07	1.31512e+07	1.30312e+07	1.37342e+07	4.80741e+06	4.36952e+06	5.34491e+06	2.63618e+07	2.57608e+07	2.68116e+07	2.92949e+07	28358846	3.12904e+07	1.87073e+07	16015362	1.95895e+07	2.22306e+07	2.12563e+07	2.26854e+07	29198249
384000000	9.61445e+06	8.98394e+06	1.02095e+07	1.02969e+07	1.00854e+07	10585891	1.04378e+07	8.96753e+06	2.58864e+07	1.41647e+07	1.3591e+07	14594085	1.15914e+07	1.14026e+07	11688640	1.15896e+07	9.89129e+06	1.21597e+07	1.16722e+07	1.15306e+07	1.28633e+07	1.65368e+07	1.58068e+07	1.87447e+07	5.6742e+06	5.19226e+06	6177445	1.35024e+07	1.2305e+07	1.42622e+07	1.31526e+07	1.30325e+07	1.37359e+07	4.80763e+06	4.36967e+06	5345245	2.63676e+07	2.57662e+07	2.68179e+07	2.93026e+07	2.83657e+07	3.13026e+07	1.87101e+07	1.60171e+07	1.95929e+07	22234693	2.126e+07	22689934	2.92056e+07
385000000	9.61519e+06	8.98447e+06	1.02105e+07	1.02977e+07	1.00861e+07	1.05867e+07	1.04388e+07	8.96812e+06	2.59103e+07	1.41662e+07	1.35923e+07	1.45961e+07	1.15923e+07	1.14033e+07	1.16896e+07	1.15906e+07	9891669	1.2161e+07	1.16732e+07	1.15316e+07	1.28662e+07	1.65392e+07	1.58088e+07	18750364	5.67448e+06	5.19243e+06	6.17785e+06	1.35038e+07	1.23059e+07	1.42644e+07	1.3154e+07	1.30339e+07	1.37376e+07	4.80784e+06	4.36982e+06	5.34558e+06	2.63733e+07	2.57715e+07	2.68242e+07	2.93103e+07	2.83725e+07	3.13148e+07	1.8713e+07	1.60189e+07	19596331	2.22388e+07	2.12637e+07	2.26945e+07	2.9213e+07
386000000	9.61593e+06	8.98501e+06	10211542	1.02985e+07	1.00869e+07	1.05876e+07	1.04398e+07	8.96871e+06	2.59341e+07	1.41677e+07	1.35935e+07	1.45981e+07	1.15931e+07	1.14039e+07	1.16905e+07	1.15917e+07	9.89205e+06	1.21622e+07	1.16743e+07	1.15326e+07	1.28691e+07	1.65415e+07	1.58108e+07	1.8756e+07	5.67475e+06	5.19259e+06	6.17826e+06	1.35053e+07	1.23069e+07	1.42666e+07	1.31554e+07	1.30352e+07	1.37393e+07	4.80805e+06	4.36997e+06	5.34591e+06	2.63791e+07	2.57769e+07	26830384	2.9318e+07	2.83793e+07	3.13269e+07	1.87158e+07	1.60207e+07	1.95997e+07	2.22428e+07	21267428	2.2699e+07	2.92203e+07
387000000	9.61666e+06	8.98553e+06	1.02126e+07	1.02992e+07	1.00876e+07	1.05884e+07	1.04408e+07	8.9693e+06	2.59578e+07	1.41692e+07	1.35948e+07	14600087	1.1594e+07	1.14046e+07	1.16914e+07	1.15927e+07	9.89242e+06	1.21634e+07	1.16753e+07	1.15336e+07	12871928	1.65439e+07	1.58128e+07	1.87615e+07	5.67502e+06	5.19276e+06	6.17866e+06	13506797	1.23079e+07	1.42688e+07	1.31568e+07	1.30365e+07	1.3741e+07	4.80827e+06	4.37012e+06	5.34624e+06	26384758	2.57822e+07	2.68366e+07	2.93256e+07	2.8386e+07	3.1339e+07	1.87186e+07	1.60224e+07	1.96031e+07	2.22468e+07	2.12711e+07	2.27035e+07	2.92276e+07
388000000	9.61739e+06	8.98606e+06	1.02136e+07	1.03e+07	1.00883e+07	1.05892e+07	1.04419e+07	8969891	2.59815e+07	1.41707e+07	1.3596e+07	1.46021e+07	1.15949e+07	1.14053e+07	1.16923e+07	1.15938e+07	9.8928e+06	1.21647e+07	1.16763e+07	1.15345e+07	1.28748e+07	1.65463e+07	1.58148e+07	1.87671e+07	5.67529e+06	5.19292e+06	6.17906e+06	1.35083e+07	1.23088e+07	1.4271e+07	1.31581e+07	1.30379e+07	1.37427e+07	4.80848e+06	4370273	5.34657e+06	26390424	25787486	2.68428e+07	29333172	2.83927e+07	3.13511e+07	1.87214e+07	1.60242e+07	1.96065e+07	2.22508e+07	2.12748e+07	2.27079e+07	2.92348e+07
389000000	9.61812e+06	8.98659e+06	1.02146e+07	1.03008e+07	1.0089e+07	1.059e+07	1.04429e+07	8.97047e+06	2.6005e+07	1.41722e+07	1.35973e+07	1.4604e+07	1.15958e+07	1.1406e+07	1.16932e+07	1.15948e+07	9.89317e+06	1.21659e+07	1.16774e+07	1.15355e+07	1.28776e+07	1.65486e+07	15816775	1.87726e+07	5.67555e+06	5.19309e+06	6.17946e+06	1.35097e+07	1.23098e+07	1.42731e+07	1.31595e+07	1.30392e+07	1.37444e+07	4.80869e+06	4.37042e+06	5.34689e+06	2.63961e+07	2.57927e+07	2.68489e+07	2.93407e+07	28399383	31363113	1.87241e+07	1.60259e+07	1.96098e+07	2.22548e+07	2.12784e+07	2.27124e+07	2.92421e+07
390000000	9.61884e+06	8.98711e+06	1.02156e+07	1.03015e+07	1.00897e+07	1.05908e+07	1.04439e+07	8.97106e+06	2.60286e+07	1.41737e+07	1.35985e+07	1.4606e+07	1.15967e+07	1.14066e+07	1.1694e+07	1.15958e+07	9.89354e+06	1.21671e+07	1.16784e+07	1.15364e+07	1.28804e+07	16550964	1.58187e+07	1.87781e+07	5.67582e+06	5.19325e+06	6.17985e+06	1.35112e+07	1.23107e+07	1.42753e+07	1.31609e+07	1.30405e+07	1.3746e+07	4.8089e+06	4.37057e+06	5.34722e+06	2.64017e+07	2.5798e+07	2.6855e+07	2.93483e+07	2.8406e+07	3.13745e+07	1.87269e+07	16027643	1.96131e+07	2.22588e+07	2.12821e+07	2.27168e+07	2.92492e+07
391000000	9.61956e+06	8.98763e+06	1.02166e+07	10302297	1.00904e+07	1.05916e+07	10444848	8.97163e+06	2.6052e+07	1.41751e+07	13599729	1.4608e+07	1.15976e+07	11407314	1.16949e+07	1.15968e+07	9.89391e+06	1.21683e+07	1.16794e+07	1.15374e+07	1.28833e+07	1.65533e+07	1.58207e+07	1.87836e+07	5.67608e+06	5.19341e+06	6.18025e+06	1.35126e+07	1.23117e+07	14277443	1.31622e+07	1.30418e+07	1.37477e+07	4.8091e+06	4370715	5.34754e+06	2.64073e+07	2.58032e+07	2.68611e+07	2.93557e+07	2.84126e+07	3.13852e+07	18729632	1.60294e+07	1.96164e+07	2.22627e+07	2.12857e+07	2.27212e+07	2.92564e+07
392000000	9.62028e+06	8.98814e+06	1.02176e+07	1.03031e+07	1.00911e+07	1.05924e+07	1.04458e+07	8.97221e+06	2.60754e+07	1.41766e+07	1.3601e+07	1.46099e+07	1.15984e+07	1.1408e+07	11695817	1.15979e+07	9.89427e+06	1.21695e+07	1.16804e+07	1.15383e+07	1.28861e+07	1.65556e+07	1.58226e+07	1.87891e+07	5.67635e+06	5193575	6.18064e+06	1.3514e+07	1.23126e+07	1.42796e+07	1.31636e+07	1.3043e+07	1.37493e+07	4.80931e+06	4.37086e+06	5.34786e+06	2.64128e+07	25808390	2.68672e+07	2.93632e+07	28419235	3.13959e+07	1.87324e+07	1.60311e+07	1.96197e+07	2.22667e+07	2.12893e+07	2.27256e+07	2.92635e+07
393000000	9.62099e+06	8.98865e+06	1.02186e+07	1.03038e+07	1.00918e+07	1.05932e+07	1.04468e+07	8.97278e+06	2.60988e+07	1.41781e+07	1.36022e+07	1.46118e+07	1.15993e+07	1.14086e+07	1.16967e+07	11598865	9.89464e+06	1.21707e+07	1.16814e+07	1.15393e+07	1.28886e+07	1.65579e+07	1.58246e+07	1.87945e+07	5.67661e+06	5.19374e+06	6.18103e+06	1.35155e+07	1.23136e+07	1.42817e+07	1.31649e+07	1.30443e+07	1.3751e+07	4.80952e+06	4.37101e+06	5.34818e+06	2.64184e+07	2.58136e+07	2.68732e+07	2.93706e+07	28425792	3.14066e+07	1.87351e+07	1.60328e+07	1.9623e+07	2.22706e+07	2.12928e+07	2.273e+07	2.92706e+07
394000000	9621699	8.98917e+06	1.02196e+07	1.03045e+07	1.00925e+07	1.0594e+07	1.04478e+07	8.97335e+06	2.6122e+07	14179540	1.36034e+07	14613775	1.16001e+07	1.14093e+07	1.16976e+07	1.15999e+07	9.895e+06	1.21719e+07	1.16824e+07	11540193	1.28905e+07	1.65602e+07	1.58265e+07	18799979	5.67687e+06	5.1939e+06	6.18142e+06	1.35169e+07	1.23145e+07	1.42838e+07	1.31662e+07	1.30456e+07	1.37526e+07	4.80972e+06	4.37115e+06	5.3485e+06	2.64239e+07	2.58187e+07	2.68792e+07	2.9378e+07	2.84323e+07	3.14172e+07	1.87378e+07	1.60345e+07	1.96263e+07	2.22745e+07	2.12964e+07	2.27343e+07	2.92777e+07
395000000	9.6224e+06	8.98967e+06	1.02206e+07	1.03053e+07	1.00932e+07	10594832	1.04488e+07	8.97392e+06	26145240	1.4181e+07	1.36046e+07	1.46157e+07	1.1601e+07	1.14099e+07	1.16984e+07	1.16009e+07	9.89536e+06	1.21731e+07	1.16834e+07	1.15411e+07	1.28924e+07	1.65625e+07	1.58284e+07	1.88054e+07	5.67713e+06	5.19405e+06	6.1818e+06	1.35183e+07	12315426	1.42859e+07	1.31676e+07	1.30469e+07	13754206	4.80992e+06	4.37129e+06	5.34882e+06	2.64294e+07	2.58238e+07	2.68852e+07	2.93854e+07	2.84388e+07	31427707	1.87405e+07	1.60362e+07	1.96295e+07	2.22784e+07	2.13e+07	2.27386e+07	2.92847e+07
396000000	9.62311e+06	8.99018e+06	10221585	1.0306e+07	1.00939e+07	10595621	1.04497e+07	8.97448e+06	26168381	1.41824e+07	1.36058e+07	1.46176e+07	1.16019e+07	1.14106e+07	1.16993e+07	1.16019e+07	9.89572e+06	1.21742e+07	1.16844e+07	1.1542e+07	1.28943e+07	1.65648e+07	1.58304e+07	1.88108e+07	5.67739e+06	5.19421e+06	6.18219e+06	1.35197e+07	1.23164e+07	1.4288e+07	1.31689e+07	1.30481e+07	1.37558e+07	4.81013e+06	4.37144e+06	5.34913e+06	2.64348e+07	2.58289e+07	2.68911e+07	2.93927e+07	2.84453e+07	31438219	1.87432e+07	1.60378e+07	1.96328e+07	2.22822e+07	2.13035e+07	2.27429e+07	2.92917e+07
397000000	9.62381e+06	8.99068e+06	1.02226e+07	1.03068e+07	1.00946e+07	1.05964e+07	1.04507e+07	8.97504e+06	2.61915e+07	1.41839e+07	1.3607e+07	1.46195e+07	1.16027e+07	1.14112e+07	1.17002e+07	1.16029e+07	9896074	1.21754e+07	1.16853e+07	1.1543e+07	1.28962e+07	1.6567e+07	1.58323e+07	1.88162e+07	5.67764e+06	5.19437e+06	6.18257e+06	1.35211e+07	1.23173e+07	1.42901e+07	1.31702e+07	13049405	1.37574e+07	4.81033e+06	4.37158e+06	5.34945e+06	2.64403e+07	2.5834e+07	2.6897e+07	2.94e+07	2.84517e+07	31448689	1.87458e+07	1.60395e+07	1.9636e+07	2.22861e+07	2.1307e+07	2.27472e+07	2.92986e+07
398000000	9.6245e+06	8.99118e+06	1.02235e+07	1.03075e+07	1.00953e+07	1.05972e+07	1.04517e+07	8.9756e+06	2.62145e+07	1.41853e+07	1.36082e+07	1.46214e+07	1.16035e+07	11411889	1.1701e+07	1.16039e+07	9.89643e+06	12176588	1.16863e+07	1.15439e+07	1.28981e+07	1.65693e+07	1.58341e+07	1.88215e+07	5.6779e+06	5.19453e+06	6.18295e+06	1.35225e+07	1.23182e+07	1.42922e+07	13171523	13050658	1.3759e+07	4.81053e+06	4.37172e+06	5.34976e+06	2.64457e+07	2.5839e+07	2.69029e+07	2.94073e+07	2.84581e+07	3.14591e+07	1.87485e+07	1.60412e+07	1.96392e+07	2.22899e+07	2.13105e+07	22751495	2.93056e+07
399000000	9.62519e+06	8991682	1.02245e+07	1.03082e+07	1.0096e+07	1.0598e+07	1.04526e+07	8.97615e+06	2.62374e+07	1.41867e+07	1.36094e+07	1.46233e+07	1.16044e+07	1.14125e+07	1.17019e+07	1.16048e+07	9.89678e+06	1.21777e+07	1.16873e+07	1.15448e+07	12899946	16571510	1.5836e+07	1.88268e+07	5.67815e+06	5.19468e+06	6.18333e+06	1.35239e+07	1.23191e+07	1.42942e+07	1.31728e+07	13051905	13760620	4.81073e+06	4.37186e+06	5.35007e+06	2.64511e+07	25844053	2.69088e+07	2.94145e+07	2.84645e+07	3.14695e+07	1.87511e+07	1.60428e+07	1.96424e+07	2.22937e+07	2.1314e+07	2.27557e+07	2.93125e+07
400000000	9.62588e+06	8.99218e+06	1.02255e+07	1.03089e+07	1.00967e+07	1.05987e+07	1.04536e+07	8.97671e+06	2.62603e+07	1.41881e+07	13610541	1.46252e+07	1.16052e+07	11413165	1.17027e+07	1.16058e+07	9.89713e+06	1.21789e+07	1.16883e+07	1.15457e+07	12901802	1.65737e+07	1.58379e+07	1.88321e+07	5.6784e+06	5.19484e+06	6.18371e+06	1.35253e+07	1.232e+07	1.42963e+07	1.31741e+07	1.30531e+07	1.37622e+07	4.81093e+06	4.372e+06	5.35038e+06	2.64564e+07	2.58491e+07	2.69146e+07	2.94217e+07	2.84709e+07	3.14798e+07	18753743	1.60445e+07	1.96455e+07	2.22975e+07	21317441	2.276e+07	2.93193e+07
401000000	9.62657e+06	8.99267e+06	1.02264e+07	1.03097e+07	1.00974e+07	1.05995e+07	1.04545e+07	8.97726e+06	26283138	1.41895e+07	1.36117e+07	14627037	1.16061e+07	1.14138e+07	1.17036e+07	1.16068e+07	9.89748e+06	1.21801e+07	1.16892e+07	1.15466e+07	1.29036e+07	1.6576e+07	1.58398e+07	1.88374e+07	5678656	5.19499e+06	6.18408e+06	1.35267e+07	1.23209e+07	1.42984e+07	1.31754e+07	1.30544e+07	13763782	4811125	4372141	5.35069e+06	26461752	25854034	26920465	2.94289e+07	2.84772e+07	3.14902e+07	1.87564e+07	16046121	1.96487e+07	2.23012e+07	2.13209e+07	22764180	2.93262e+07
402000000	9.62725e+06	8.99316e+06	1.02274e+07	1.03104e+07	1.0098e+07	1.06003e+07	10455455	8.9778e+06	2.63059e+07	1.41909e+07	1.36129e+07	1.46289e+07	1.16069e+07	1.14144e+07	1.17044e+07	1.16078e+07	9.89783e+06	1.21812e+07	1.16902e+07	1.15475e+07	1.29055e+07	1.65782e+07	1.58416e+07	1.88427e+07	5.67891e+06	5.19515e+06	6.18446e+06	1.3528e+07	1.23218e+07	1.43004e+07	1.31767e+07	1.30556e+07	1.37654e+07	4.81132e+06	4.37228e+06	5.35099e+06	2.64671e+07	2.5859e+07	2.69263e+07	2.9436e+07	2.84835e+07	3.15004e+07	1.8759e+07	1.60478e+07	1.96519e+07	2.2305e+07	2.13243e+07	2.27684e+07	29332978
403000000	9.62793e+06	8.99365e+06	1.02283e+07	1.03111e+07	1.00987e+07	1.0601e+07	1.04564e+07	8.97835e+06	2.63286e+07	1.41923e+07	13614042	1.46308e+07	1.16077e+07	1.14151e+07	11705234	1.16087e+07	9.89817e+06	1.21823e+07	1.16911e+07	1.15484e+07	1.29073e+07	1.65804e+07	1.58435e+07	1.8848e+07	5.67916e+06	5.1953e+06	6.18483e+06	1.35294e+07	1.23227e+07	1.43024e+07	1.3178e+07	1.30568e+07	1.37669e+07	4.81152e+06	4.37242e+06	5351297	2.64724e+07	2.58639e+07	2.6932e+07	2.94431e+07	2.84898e+07	3.15106e+07	18761555	1.60494e+07	1.9655e+07	22308738	2.13277e+07	2.27725e+07	2.93398e+07
404000000	9.6286e+06	8.99414e+06	1.02293e+07	10311811	1.00994e+07	1.06018e+07	1.04573e+07	8.97889e+06	2.63512e+07	1.41937e+07	1.36152e+07	1.46326e+07	1.16085e+07	1.14157e+07	1.17061e+07	1.16097e+07	9.89851e+06	1.21835e+07	1.16921e+07	1.15493e+07	1.29091e+07	1.65826e+07	1.58453e+07	1.88532e+07	5.6794e+06	5.19545e+06	6.1852e+06	1.35308e+07	1.23236e+07	1.43044e+07	1.31793e+07	13058037	1.37685e+07	4.81171e+06	4.37256e+06	5.3516e+06	2.64776e+07	2.58688e+07	2.69378e+07	2.94502e+07	2.8496e+07	3.15208e+07	1.87641e+07	1.6051e+07	1.96581e+07	2.23125e+07	21331139	2.27767e+07	2.93465e+07
405000000	9.62927e+06	8.99462e+06	1.02302e+07	1.03125e+07	1.01e+07	1.06026e+07	1.04583e+07	8.97943e+06	2.63738e+07	1.41951e+07	1.36163e+07	1.46344e+07	1.16093e+07	1.14163e+07	1.17069e+07	1.16106e+07	9.89886e+06	1.21846e+07	1.1693e+07	1.15502e+07	1.2911e+07	1.65847e+07	1.58472e+07	1.88584e+07	5.67965e+06	5.1956e+06	6185565	13532104	12324472	1.43065e+07	1.31805e+07	1.30592e+07	1.377e+07	4.81191e+06	4372692	5.3519e+06	2.64829e+07	2.58737e+07	2.69435e+07	2.94572e+07	2.85022e+07	3.1531e+07	1.87667e+07	1.60526e+07	1.96612e+07	2.23162e+07	2.13345e+07	2.27808e+07	2.93532e+07
406000000	9.62994e+06	8.9951e+06	1.02312e+07	1.03132e+07	1.01007e+07	1.06033e+07	1.04592e+07	8.97997e+06	2.63963e+07	1.41965e+07	1.36175e+07	14636260	1.16101e+07	1.14169e+07	1.17077e+07	1.16116e+07	9.8992e+06	1.21857e+07	1.1694e+07	1.15511e+07	12912766	1.65869e+07	1.5849e+07	1.88636e+07	5679896	5.19575e+06	6.18593e+06	1.35334e+07	12325353	1.43085e+07	1.31818e+07	1.30604e+07	1.37716e+07	4812099	4372828	5.3522e+06	2.64881e+07	25878558	2.69492e+07	2.94642e+07	2.85084e+07	31541072	1.87693e+07	1.60542e+07	1.96643e+07	2.23198e+07	2.13379e+07	2.27849e+07	2.93599e+07
407000000	9.63061e+06	8.99558e+06	1.02321e+07	1.03139e+07	1.01013e+07	1.06041e+07	1.04601e+07	8.9805e+06	26418795	1.41979e+07	1.36186e+07	1.46381e+07	11610957	1.14175e+07	1.17085e+07	1.16125e+07	9.89953e+06	1.21868e+07	1.16949e+07	1.15519e+07	1.29146e+07	1.65891e+07	1.58508e+07	1.88688e+07	5.68014e+06	5.1959e+06	6.1863e+06	1.35348e+07	1.23262e+07	1.43105e+07	1.3183e+07	13061644	13773093	4.81229e+06	4.37296e+06	5.3525e+06	2.64933e+07	25883392	2.69548e+07	2.94712e+07	2.85146e+07	31551136	1.87718e+07	1.60558e+07	1.96674e+07	2.23235e+07	2.13412e+07	2.2789e+07	2.93666e+07
408000000	9.63127e+06	8.99606e+06	1.0233e+07	1.03146e+07	1.0102e+07	1.06048e+07	10461010	8.98103e+06	2.64412e+07	14199218	1.36198e+07	1.46399e+07	1.16118e+07	1.14181e+07	1.17094e+07	1.16135e+07	9.89987e+06	1.2188e+07	1.16958e+07	1.15528e+07	1.29164e+07	1.65912e+07	1.58526e+07	1.88739e+07	5.68038e+06	5.19605e+06	6186659	1.35361e+07	1.23271e+07	1.43124e+07	1.31843e+07	1.30628e+07	1.37746e+07	4812482	4.3731e+06	5.3528e+06	2.64985e+07	2.58882e+07	2.69605e+07	2.94781e+07	2.85207e+07	3.15612e+07	1.87743e+07	1.60574e+07	1.96704e+07	2.23272e+07	2.13446e+07	2.27931e+07	2.93732e+07
409000000	9.63193e+06	8.99653e+06	10233950	1.03153e+07	1.01026e+07	1.06055e+07	1.04619e+07	8.98156e+06	2.64635e+07	1.42006e+07	13620896	1.46417e+07	1.16126e+07	1.14187e+07	1.17102e+07	1.16144e+07	9.9002e+06	1.21891e+07	1.16968e+07	1.15537e+07	1.29181e+07	1.65933e+07	1.58544e+07	18879083	5.68063e+06	5196200	6.18702e+06	1.35374e+07	1.2328e+07	1.43144e+07	1.31855e+07	1.3064e+07	1.37761e+07	4.81267e+06	4.37323e+06	5353095	2.65036e+07	2.5893e+07	2.69661e+07	2.94851e+07	2.85268e+07	3.15711e+07	1.87769e+07	1.6059e+07	1.96735e+07	2.23308e+07	2.13479e+07	2.27972e+07	2.93798e+07
410000000	9.63259e+06	8.99701e+06	1.02349e+07	1.0316e+07	1.01033e+07	1.06063e+07	1.04628e+07	8.98209e+06	2.64858e+07	1.42019e+07	1.3622e+07	1.46435e+07	1.16134e+07	1.14193e+07	1.1711e+07	1.16153e+07	9.90054e+06	1.21902e+07	1.16977e+07	1.15546e+07	1.29199e+07	1.65955e+07	1.58562e+07	1.88842e+07	5.68087e+06	5.19635e+06	6.18738e+06	1.35388e+07	1.23288e+07	1.43164e+07	1.31868e+07	1.30652e+07	1.37777e+07	4.81286e+06	4.37337e+06	5.35339e+06	2.65087e+07	2.58978e+07	2.69717e+07	2.9492e+07	2.85329e+07	3.15811e+07	1.87794e+07	1.60605e+07	1.96765e+07	2.23344e+07	21351220	2.28012e+07	2.93864e+07
411000000	9.63324e+06	8.99748e+06	10235787	1.03167e+07	1.01039e+07	1.0607e+07	1.04637e+07	8.98261e+06	2.6508e+07	1.42033e+07	13623138	1.46453e+07	1.16141e+07	1.14199e+07	1.17118e+07	1.16163e+07	9.90087e+06	1.21913e+07	1.16986e+07	1.15554e+07	1.29217e+07	1.65976e+07	1.5858e+07	18889308	5.68111e+06	5.19649e+06	6.18774e+06	1.35401e+07	1.23297e+07	1.43184e+07	1.3188e+07	13066375	1.37792e+07	4.81305e+06	4.3735e+06	5353683	2.65138e+07	2.59025e+07	26977249	2.94988e+07	2.85389e+07	3.1591e+07	1.87819e+07	16062105	1.96795e+07	2.2338e+07	2.13545e+07	2.28052e+07	2.93929e+07
412000000	9.63389e+06	8.99794e+06	1.02367e+07	1.03174e+07	1.01046e+07	1.06077e+07	1.04646e+07	8.98314e+06	2.65302e+07	1.42046e+07	1.36243e+07	1.46471e+07	1.16149e+07	1.14205e+07	1.17126e+07	1.16172e+07	9.9012e+06	12192356	1.16995e+07	1.15563e+07	1.29234e+07	1.65997e+07	1.58597e+07	18894393	5.68135e+06	5.19664e+06	6.18809e+06	1.35414e+07	12330553	1.43203e+07	1.31892e+07	1.30675e+07	1.37807e+07	4.81324e+06	4.37363e+06	5353975	2.65189e+07	2.59072e+07	2.69828e+07	2.95056e+07	28544936	3.16009e+07	1.87843e+07	1.60637e+07	19682534	2.23416e+07	2.13578e+07	2.28093e+07	2.93994e+07
413000000	9.63454e+06	8.99841e+06	1.02376e+07	1.03181e+07	1.01052e+07	1.06085e+07	1.04655e+07	8.98366e+06	2.65523e+07	1.42059e+07	1.36254e+07	1.46488e+07	1.16157e+07	1.14211e+07	1.17134e+07	1.16181e+07	9.90152e+06	12193443	1.17004e+07	11557125	1.29252e+07	1.66018e+07	15861507	1.88995e+07	5.68158e+06	5.19679e+06	6.18845e+06	1.35427e+07	1.23314e+07	1.43222e+07	1.31905e+07	1.30687e+07	1.37821e+07	4.81342e+06	4.37376e+06	5.35427e+06	2.6524e+07	2.59119e+07	2.69883e+07	2.95124e+07	2.85509e+07	3.16107e+07	1.87868e+07	1.60652e+07	1.96855e+07	2.23452e+07	2.13611e+07	2.28132e+07	2.94059e+07
414000000	9635183	8.99887e+06	1.02385e+07	1.03187e+07	1.01058e+07	1.06092e+07	1.04664e+07	8.98417e+06	2.65743e+07	1.42073e+07	1.36265e+07	1.46506e+07	1.16165e+07	1.14217e+07	1.17142e+07	1.1619e+07	9.90185e+06	12194525	1.17013e+07	1.1558e+07	12926942	16603894	1.58633e+07	1.89045e+07	5.68182e+06	5.19693e+06	6.1888e+06	1.3544e+07	1.23323e+07	1.43242e+07	1.31917e+07	1.30699e+07	1.37836e+07	4.81361e+06	4.37389e+06	5.35455e+06	2.6529e+07	2.59166e+07	26993805	2.95192e+07	28556905	3.16205e+07	1.87893e+07	1.60668e+07	1.96885e+07	2.23487e+07	2.13643e+07	2.28172e+07	29412392
415000000	9.63582e+06	8.99933e+06	1.02394e+07	10319409	1.01065e+07	1.06099e+07	1.04673e+07	8.98469e+06	26596280	1.42086e+07	1.36276e+07	1.46524e+07	11617281	1.14223e+07	1.1715e+07	1.16199e+07	9.90217e+06	12195602	1.17022e+07	1.15588e+07	1.29287e+07	16605975	1.5865e+07	1.89095e+07	5.68205e+06	5.19708e+06	6.18915e+06	1.35453e+07	1.23331e+07	1.43261e+07	1.31929e+07	1.3071e+07	13785114	4.81379e+06	4.37402e+06	5.35484e+06	2.6534e+07	2.59213e+07	26999276	2.9526e+07	2.85629e+07	3.16303e+07	1.87917e+07	1.60683e+07	1.96915e+07	2.23523e+07	2.13675e+07	2.28212e+07	2.94188e+07
416000000	9.63646e+06	8.99979e+06	1.02403e+07	1.03201e+07	1.01071e+07	1.06106e+07	1.04682e+07	8.9852e+06	2.66182e+07	1.42099e+07	1.36287e+07	1.46541e+07	1.16181e+07	1.14229e+07	1.17157e+07	1.16209e+07	9.90249e+06	12196674	1.17031e+07	1.15597e+07	1.29304e+07	1.6608e+07	1.58668e+07	1.89146e+07	5.68229e+06	5.19722e+06	6.1895e+06	1.35465e+07	1.23339e+07	14328027	1.31941e+07	13072166	1.37866e+07	4813978	4.37415e+06	5.35513e+06	2.6539e+07	2.59259e+07	2.70047e+07	2.95327e+07	2.85688e+07	3.164e+07	1.87942e+07	1.60698e+07	1.96944e+07	2.23558e+07	2.13708e+07	2.28251e+07	2.94252e+07
417000000	9.6371e+06	9.00025e+06	1.02412e+07	1.03207e+07	1.01077e+07	1.06113e+07	1.04691e+07	8.98571e+06	2.66401e+07	1.42112e+07	1.36297e+07	1.46559e+07	1.16188e+07	1.14235e+07	1.17165e+07	1.16218e+07	9.90282e+06	1.21977e+07	11704024	1.15605e+07	1.29321e+07	1.66101e+07	1.58685e+07	1.89195e+07	5.68252e+06	5.19736e+06	6.18985e+06	1.35478e+07	1.23348e+07	1.43299e+07	1.31953e+07	1.30733e+07	1.37881e+07	4.81416e+06	4.37428e+06	5.35541e+06	2.6544e+07	2.59306e+07	2.70101e+07	2.95394e+07	2.85747e+07	3.16497e+07	1.87966e+07	16071346	1.96974e+07	2.23593e+07	2.1374e+07	2.2829e+07	2.94316e+07
418000000	9.63773e+06	9.00071e+06	1.02421e+07	1.03214e+07	1.01084e+07	1.06121e+07	10469929	8986216	2.66619e+07	1.42125e+07	1.36308e+07	1.46576e+07	1.16196e+07	1.14241e+07	1.17173e+07	1.16227e+07	9.90313e+06	1.21988e+07	11704913	1.15613e+07	1.29338e+07	1.66122e+07	1.58702e+07	1.89245e+07	5.68275e+06	5.1975e+06	6190196	13549091	1.23356e+07	1.43318e+07	1.31965e+07	1.30744e+07	1.37895e+07	4.81434e+06	4.37441e+06	5.3557e+06	26548940	2.59352e+07	2.70155e+07	2.9546e+07	2.85805e+07	3.16593e+07	1.8799e+07	1.60729e+07	1.97003e+07	2.23628e+07	2.13772e+07	2.28329e+07	2.9438e+07
419000000	9.63836e+06	9.00116e+06	1.0243e+07	1.03221e+07	10108979	1.06128e+07	1.04708e+07	8.98672e+06	2.66836e+07	1.42138e+07	1.36319e+07	1.46593e+07	1.16204e+07	1.14246e+07	11718074	1.16235e+07	9.90345e+06	1.21999e+07	1.17058e+07	1.15622e+07	1.29356e+07	1.66142e+07	1.58719e+07	1.89295e+07	5.68298e+06	5.19765e+06	6.19054e+06	1.35504e+07	1.23364e+07	1.43337e+07	1.31977e+07	1.30756e+07	1.3791e+07	4.81452e+06	4.37454e+06	5.35598e+06	2.65539e+07	2.59398e+07	2.70209e+07	2.95527e+07	2.85864e+07	3.16689e+07	1.88014e+07	1.60744e+07	1.97032e+07	2.23663e+07	2.13803e+07	2.28368e+07	2.94443e+07
420000000	9.63899e+06	9.00161e+06	1.02438e+07	1.03227e+07	1.01096e+07	1.06135e+07	10471664	8.98722e+06	2.67053e+07	1.42151e+07	1.3633e+07	1.4661e+07	1.16211e+07	1.14252e+07	11718845	1.16244e+07	9.90377e+06	1.22009e+07	1.17067e+07	1.1563e+07	1.29373e+07	1.66162e+07	1.58736e+07	1.89344e+07	5.68321e+06	5197786	6.19088e+06	1.35516e+07	1.23373e+07	1.43356e+07	1.31988e+07	1.30767e+07	1.37924e+07	4.81471e+06	4.37467e+06	5356262	2.65588e+07	2.59443e+07	2.70263e+07	2.95593e+07	2.85922e+07	3.16785e+07	1.88038e+07	1.60759e+07	1.97061e+07	2.23697e+07	2.13835e+07	2.28407e+07	2.94506e+07
421000000	9.63961e+06	9002057	1.02447e+07	1.03234e+07	1.01102e+07	1.06142e+07	1.04725e+07	8.98772e+06	2.67269e+07	1.42164e+07	1.3634e+07	1.46628e+07	1.16219e+07	1.14258e+07	1.17196e+07	1.16253e+07	9.90408e+06	1.2202e+07	1.17076e+07	1.15638e+07	1.29389e+07	1.66183e+07	1.58753e+07	1.89394e+07	5.68344e+06	5.19793e+06	6.19123e+06	1.35529e+07	1.23381e+07	1.43375e+07	1.32e+07	1.30778e+07	1.37938e+07	4.81488e+06	4.37479e+06	5.35654e+06	2.65637e+07	2.59489e+07	2.70316e+07	2.95658e+07	2.8598e+07	3.1688e+07	1.88062e+07	1.60774e+07	1.9709e+07	2.23732e+07	2.13867e+07	2.28445e+07	2.94569e+07
422000000	9.64023e+06	9.0025e+06	1.02456e+07	1.0324e+07	1.01108e+07	1.06149e+07	1.04734e+07	8.98822e+06	2.67485e+07	1.42177e+07	1.36351e+07	1.46645e+07	1.16226e+07	1.14264e+07	1.17204e+07	11626209	9.90439e+06	1.2203e+07	1.17084e+07	1.15646e+07	1.29406e+07	1.66203e+07	1.5877e+07	1.89443e+07	5.68367e+06	5.19807e+06	6.19157e+06	1.35541e+07	1.23389e+07	1.43394e+07	1.32012e+07	1.30789e+07	1.37953e+07	4.81506e+06	4.37492e+06	5.35682e+06	2.65685e+07	2.59534e+07	2.70369e+07	2.95724e+07	2.86038e+07	3.16975e+07	1.88086e+07	1.60789e+07	1.97119e+07	2.23766e+07	2.13898e+07	2.28484e+07	2.94631e+07
423000000	9.64085e+06	9.00295e+06	1.02465e+07	1.03247e+07	1.01114e+07	1.06156e+07	10474237	8.98872e+06	2.677e+07	1.42189e+07	1.36362e+07	1.46662e+07	1.16234e+07	1.14269e+07	1.17211e+07	1.16271e+07	9.90471e+06	1.2204e+07	1.17093e+07	1.15654e+07	1.29423e+07	1.66223e+07	15878724	1.89492e+07	5.6839e+06	5.1982e+06	6.1919e+06	1.35554e+07	1.23397e+07	1.43412e+07	1.32024e+07	1.30801e+07	1.37967e+07	4.81524e+06	4.37504e+06	5357098	2.65734e+07	2.59579e+07	2.70422e+07	2.95789e+07	2.86095e+07	3.1707e+07	18810965	1.60803e+07	1.97147e+07	22380027	2.13929e+07	2.28522e+07	2.94693e+07
424000000	9.64146e+06	9.00339e+06	10247329	1.03253e+07	1.0112e+07	1.06162e+07	1.04751e+07	8.98921e+06	2.67915e+07	14220190	1.36372e+07	1.46678e+07	1.16241e+07	1.14275e+07	1.17219e+07	1.1628e+07	9.90501e+06	1.22051e+07	1.17102e+07	11566257	1.2944e+07	1.66243e+07	1.58804e+07	1.8954e+07	5.68412e+06	5.19834e+06	6.19224e+06	1.35566e+07	12340528	14343082	1.32035e+07	1.30812e+07	1.37981e+07	4.81542e+06	4.37517e+06	5.35737e+06	2.65782e+07	2.59624e+07	2.70475e+07	2.95854e+07	2.86152e+07	3.17164e+07	1.88133e+07	1.60818e+07	1.97176e+07	22383428	2.1396e+07	2.2856e+07	29475503
425000000	9.64208e+06	9.00383e+06	1.02482e+07	1.0326e+07	10112642	1.06169e+07	10475933	8.9897e+06	2.68129e+07	1.42215e+07	1.36383e+07	1.46695e+07	1.16248e+07	11428044	1.17226e+07	1.16288e+07	9.90532e+06	1.22061e+07	1.1711e+07	1.15671e+07	1.29457e+07	1.66263e+07	1.58821e+07	1.89589e+07	5.68435e+06	5.19848e+06	6.19258e+06	1.35578e+07	1.23413e+07	1.43449e+07	1.32047e+07	1.30823e+07	1.37995e+07	4.8156e+06	4.37529e+06	5.35765e+06	2.6583e+07	2.59668e+07	2.70527e+07	2.95919e+07	28620918	3.17258e+07	1.88157e+07	1.60833e+07	1.97204e+07	2.23868e+07	2.13991e+07	2.28598e+07	2.94817e+07
426000000	9.64269e+06	9004268	1.0249e+07	1.03266e+07	1.01132e+07	1.06176e+07	1.04768e+07	8.99019e+06	26834206	1.42227e+07	1.36393e+07	1.46712e+07	1.16256e+07	1.14286e+07	1.17234e+07	1.16297e+07	9905629	1.22071e+07	1.17119e+07	1.15679e+07	1.29473e+07	1.66283e+07	1.58837e+07	1.89637e+07	5.68457e+06	5.19862e+06	6.19291e+06	1.35591e+07	1.23421e+07	1.43468e+07	1.32058e+07	1.30834e+07	1.38009e+07	4.81577e+06	4.37542e+06	5.35792e+06	2.65878e+07	2.59711e+07	2.70579e+07	2.95983e+07	2.86266e+07	3.17351e+07	18817999	1.60847e+07	1.97232e+07	2.23902e+07	2.14022e+07	2.28636e+07	2.94878e+07
427000000	9.64329e+06	9.0047e+06	1.02499e+07	1.03273e+07	1.01138e+07	1.06183e+07	1.04776e+07	8990677	2.68555e+07	1.4224e+07	1.36403e+07	1.46729e+07	1.16263e+07	1.14292e+07	1.17241e+07	1.16306e+07	9.90593e+06	12208148	1.17127e+07	1.15687e+07	12948961	1.66302e+07	1.58854e+07	1.89685e+07	5.68479e+06	5.19875e+06	6.19324e+06	13560274	1.23429e+07	14348597	1.3207e+07	1.30844e+07	1.38024e+07	4.81595e+06	4.37554e+06	5.35819e+06	2.65925e+07	2.59753e+07	2.70631e+07	2.96047e+07	2.86322e+07	3.17445e+07	18820323	1.60862e+07	1.9726e+07	2.23935e+07	2.14053e+07	2.28673e+07	29493921
428000000	9.6439e+06	9.00514e+06	1.02507e+07	1.03279e+07	10114436	1.0619e+07	1.04784e+07	8.99116e+06	2.68767e+07	1.42252e+07	1.36414e+07	1.46745e+07	1.1627e+07	1.14297e+07	1.17249e+07	1.16314e+07	9.90624e+06	12209163	1.17136e+07	1.15695e+07	1.29506e+07	1.66322e+07	1.5887e+07	1.89733e+07	5.68501e+06	5.19889e+06	6193573	1.35615e+07	1.23437e+07	1.43504e+07	1.32081e+07	1.30855e+07	1.38037e+07	4.81612e+06	4.37566e+06	5358466	2.65973e+07	2.59796e+07	2.70683e+07	29611091	2.86379e+07	3.17538e+07	1.88226e+07	1.60876e+07	1.97288e+07	2.23969e+07	2.14083e+07	2.28711e+07	29500009
429000000	9.6445e+06	9.00557e+06	1.02516e+07	1.03285e+07	1.0115e+07	1.06197e+07	1.04793e+07	8.99164e+06	2.68979e+07	1.42264e+07	1.36424e+07	1.46762e+07	1.16278e+07	1.14303e+07	1.17256e+07	1.16323e+07	9.90654e+06	1.22102e+07	1.17144e+07	1.15703e+07	1.29522e+07	1.66342e+07	1.58887e+07	1.89781e+07	5.68524e+06	5.19902e+06	6.1939e+06	1.35627e+07	1.23445e+07	1.43522e+07	1.32093e+07	1.30866e+07	1.38051e+07	4.81629e+06	4375785	5.35874e+06	2.6602e+07	2.59838e+07	2.70735e+07	2.96174e+07	2.86435e+07	3.1763e+07	1.88249e+07	16089091	1.97316e+07	2.24002e+07	2.14114e+07	2.28748e+07	2.95061e+07
430000000	9.6451e+06	9.006e+06	10252434	1.03292e+07	1.01156e+07	1.06203e+07	1.04801e+07	8.99212e+06	2.6919e+07	1.42277e+07	1.36434e+07	1.46779e+07	1.16285e+07	11430800	1.17264e+07	1.16331e+07	9.90684e+06	1.22112e+07	1.17153e+07	1.1571e+07	1.29539e+07	1.66361e+07	1.58903e+07	1.89829e+07	5.68545e+06	5.19916e+06	6.19423e+06	1.35639e+07	1.23453e+07	1.4354e+07	13210385	1.30877e+07	1.38065e+07	4.81646e+06	4.37591e+06	5.359e+06	2.66067e+07	2.5988e+07	2.70786e+07	2.96238e+07	28649037	3.17722e+07	1.88272e+07	1.60905e+07	1.97344e+07	22403526	2.14144e+07	2.28785e+07	2.95121e+07
431000000	9.64569e+06	9.00643e+06	1.02533e+07	1.03298e+07	1.01162e+07	1.0621e+07	1.04809e+07	8.9926e+06	2.69401e+07	1.42289e+07	1.36445e+07	14679495	1.16292e+07	1.14313e+07	1.17271e+07	1.1634e+07	9907138	1.22122e+07	1.17161e+07	1.15718e+07	1.29555e+07	1.6638e+07	1.5892e+07	1.89877e+07	5.68567e+06	5.19929e+06	6.19456e+06	1.35651e+07	1.23461e+07	1.43558e+07	1.32115e+07	1.30888e+07	1.38079e+07	4.81664e+06	4.37603e+06	5.35927e+06	2.66114e+07	2.59921e+07	2.70837e+07	2.96301e+07	2.86546e+07	3.17814e+07	18829517	1.6092e+07	1.97372e+07	2.24068e+07	2.14174e+07	2.28822e+07	2.95181e+07
432000000	9.64629e+06	9.00685e+06	1.02541e+07	1.03304e+07	1.01168e+07	1.06217e+07	1.04818e+07	8.99308e+06	2.69611e+07	1.42301e+07	1.36455e+07	14681131	1.16299e+07	1.14319e+07	1.17278e+07	1.16348e+07	9.90744e+06	1.22132e+07	1.17169e+07	1.15726e+07	1.29571e+07	1.664e+07	15893572	1.89924e+07	5.68589e+06	5.19942e+06	6.19488e+06	1.35663e+07	1.23469e+07	1.43576e+07	1.32126e+07	1.30898e+07	1.38093e+07	4816807	4.37615e+06	5.35954e+06	2.6616e+07	2.59963e+07	2.70888e+07	2.96364e+07	2.86601e+07	3.17906e+07	1.88318e+07	1.60934e+07	1.97399e+07	2.24101e+07	2.14204e+07	2.28859e+07	2.95241e+07
433000000	9646876	9.00728e+06	1.02549e+07	1.0331e+07	1.01174e+07	1.06223e+07	1.04826e+07	8.99355e+06	2.69821e+07	1.42313e+07	1.36465e+07	1.46828e+07	1.16306e+07	1.14324e+07	1.17286e+07	1.16357e+07	9.90773e+06	1.22142e+07	1.17178e+07	1.15734e+07	12958723	1.66419e+07	1.58952e+07	1.89971e+07	5.68611e+06	5199557	6.1952e+06	1.35675e+07	1.23477e+07	1.43594e+07	1.32137e+07	1.30909e+07	1.38106e+07	4816977	4.37627e+06	5.3598e+06	2.66207e+07	2.60004e+07	2.70939e+07	2.96426e+07	2.86656e+07	3.17997e+07	1.88341e+07	1.60948e+07	1.97427e+07	2.24134e+07	2.14234e+07	2.28895e+07	2.95301e+07
434000000	9647464	9.0077e+06	1.02558e+07	1.03317e+07	1.0118e+07	1.0623e+07	1.04834e+07	8.99402e+06	2.7003e+07	1.42325e+07	1.36475e+07	1.46844e+07	1.16313e+07	1.1433e+07	1.17293e+07	1.16365e+07	9.90803e+06	1.22152e+07	1.17186e+07	1.15742e+07	1.29603e+07	1.66438e+07	1.58968e+07	1.90018e+07	5.68632e+06	5.19969e+06	6.19553e+06	1.35687e+07	1.23484e+07	1.43612e+07	1.32149e+07	1.3092e+07	1.3812e+07	4.81715e+06	4.37639e+06	5.36007e+06	2.66253e+07	2.60046e+07	2.70989e+07	2.96489e+07	2.86711e+07	3.18087e+07	1.88363e+07	1.60962e+07	19745399	2.24166e+07	2.14264e+07	2.28932e+07	2.9536e+07
435000000	9.64805e+06	9.00812e+06	1.02566e+07	1.03323e+07	1.01185e+07	1.06236e+07	1.04842e+07	8.99449e+06	2.70238e+07	1.42337e+07	1.36485e+07	1.4686e+07	11632042	1.14335e+07	1.173e+07	1.16373e+07	9.90832e+06	1.22161e+07	1.17194e+07	1.15749e+07	1.29619e+07	16645707	1.58984e+07	1.90065e+07	5.68654e+06	5.19982e+06	6.19585e+06	1.35698e+07	12349206	1.4363e+07	1.3216e+07	13093007	1.38133e+07	4.81731e+06	4.37651e+06	5360330	2.66299e+07	2.60087e+07	2.71039e+07	29655056	2.86766e+07	3.18178e+07	1.88386e+07	1.60976e+07	19748116	2.24199e+07	2.14293e+07	2.28968e+07	2.95419e+07
436000000	9.64863e+06	9.00854e+06	1.02574e+07	1.03329e+07	1.01191e+07	1.06243e+07	1.0485e+07	8.99496e+06	2.70446e+07	1.42349e+07	1.36495e+07	1.46876e+07	1.16327e+07	1.1434e+07	1.17307e+07	1.16382e+07	9.90861e+06	1.22171e+07	11720243	1.15757e+07	1.29635e+07	1.66476e+07	1.59e+07	1.90112e+07	5.68675e+06	5.19995e+06	6.19617e+06	1.3571e+07	12349974	1.43647e+07	13217064	1.30941e+07	1.38147e+07	4.81748e+06	4.37662e+06	5.36059e+06	2.66345e+07	2.60127e+07	2.71089e+07	2.96612e+07	2.8682e+07	3.18268e+07	1.88408e+07	16099013	1.97508e+07	2.24231e+07	2.14323e+07	2.29004e+07	2.95478e+07
437000000	9.64921e+06	9.00896e+06	1.02582e+07	1.03335e+07	1.01197e+07	1.06249e+07	1.04858e+07	8.99542e+06	27065331	1.42361e+07	1.36505e+07	1.46892e+07	1.16334e+07	1.14345e+07	11731426	1.1639e+07	9.9089e+06	1.22181e+07	11721059	1.15765e+07	1.29651e+07	1.66495e+07	1.59016e+07	1.90159e+07	5.68696e+06	5.20008e+06	6.19648e+06	1.35722e+07	1.23507e+07	1.43665e+07	1.32182e+07	1.30951e+07	1.3816e+07	4.81765e+06	4.37674e+06	5360852	2.66391e+07	2.60168e+07	2.71139e+07	2.96674e+07	2.86874e+07	3.18358e+07	18843010	1.61004e+07	1.97535e+07	2.24263e+07	2.14352e+07	2.2904e+07	2.95537e+07
438000000	9.64979e+06	9.00937e+06	1.0259e+07	1.03341e+07	1.01202e+07	1.06256e+07	1.04866e+07	8.99589e+06	2.7086e+07	1.42373e+07	1.36515e+07	1.46908e+07	1.16341e+07	11435071	1.17321e+07	1.16398e+07	9.90919e+06	1.22191e+07	1.17219e+07	1.15772e+07	1.29667e+07	1.66514e+07	1.59031e+07	1.90205e+07	5.68717e+06	5.20021e+06	6.1968e+06	1.35733e+07	1.23515e+07	1.43682e+07	1.32193e+07	13096139	1.38174e+07	4.81782e+06	4.37686e+06	5.36111e+06	2.66436e+07	2.60209e+07	2.71189e+07	2.96735e+07	2.86928e+07	3.18447e+07	1.88452e+07	1.61018e+07	1.97562e+07	2.24295e+07	2.14381e+07	2.29076e+07	2.95595e+07
439000000	9.65036e+06	9.00978e+06	1.02598e+07	1.03347e+07	1.01208e+07	1.06262e+07	1.04874e+07	8996347	2.71066e+07	1.42384e+07	1.36525e+07	1.46924e+07	1.16348e+07	1.14356e+07	1.17328e+07	1.16406e+07	9.90948e+06	1.222e+07	1.17227e+07	1.1578e+07	12968245	1.66532e+07	1.59047e+07	1.90251e+07	5.68739e+06	5.20034e+06	6.19712e+06	1.35745e+07	1.23523e+07	1.437e+07	13220338	1.30972e+07	1.38187e+07	4.81798e+06	4.37698e+06	5.36137e+06	2.66481e+07	2.60249e+07	2.71238e+07	2.96796e+07	2.86982e+07	3.18537e+07	1.88474e+07	1.61032e+07	1.97589e+07	2.24327e+07	2.1441e+07	2.29112e+07	2.95653e+07
440000000	9.65094e+06	9010196	10260650	1.03353e+07	1.01214e+07	1.06269e+07	1.04882e+07	8.99681e+06	2.71272e+07	1.42396e+07	1.36534e+07	1.4694e+07	1.16355e+07	11436113	11733548	1.16414e+07	9.90976e+06	1.2221e+07	1.17235e+07	1.15788e+07	1.29698e+07	1.66551e+07	1.59063e+07	1.90297e+07	5.68759e+06	5.20047e+06	6197429	1.35757e+07	1.2353e+07	1.43717e+07	1.32214e+07	1.30982e+07	1.382e+07	4.81815e+06	4.37709e+06	5.36163e+06	2.66526e+07	2.60289e+07	2.71288e+07	2.96857e+07	2.87035e+07	3.18625e+07	1.88496e+07	1.61045e+07	1.97615e+07	2.24359e+07	2.14439e+07	2.29147e+07	2.95711e+07
441000000	9.65151e+06	9.01061e+06	1.02615e+07	1.03359e+07	1.01219e+07	1.06275e+07	1.0489e+07	8.99726e+06	2.71477e+07	1.42408e+07	1.36544e+07	1.46956e+07	1.16362e+07	1.14366e+07	1.17342e+07	1.16422e+07	9.91005e+06	12221955	1.17243e+07	1.15795e+07	1.29714e+07	1.6657e+07	15907844	1.90343e+07	5.6878e+06	5.2006e+06	6.19774e+06	13576804	1.23538e+07	1.43734e+07	1.32225e+07	1.30992e+07	1.38213e+07	4.81831e+06	4.37721e+06	5361882	2.66571e+07	2.60329e+07	2.71337e+07	2.96918e+07	2.87089e+07	3.18714e+07	1.88518e+07	1.61059e+07	19764177	2.24391e+07	2.14468e+07	2.29183e+07	2.95769e+07
442000000	9652075	9.01101e+06	1.02623e+07	1.03365e+07	1.01225e+07	1.06282e+07	10489754	8.99772e+06	2.71682e+07	1.42419e+07	1.36554e+07	1.46971e+07	1.16369e+07	1.14371e+07	1.17349e+07	1.1643e+07	9.91033e+06	12222909	1.17251e+07	11580251	1.29729e+07	1.66588e+07	1.59094e+07	1.90389e+07	5.68801e+06	5.20072e+06	6198052	1.35779e+07	1.23545e+07	1.43752e+07	1.32236e+07	1.31003e+07	1.38227e+07	4818473	4.37732e+06	5.36214e+06	2.66616e+07	26036888	27138557	2.96977e+07	2.87142e+07	3.18802e+07	1.8854e+07	1.61073e+07	1.97668e+07	2.24422e+07	2.14497e+07	2.29218e+07	2.95826e+07
443000000	9652640	9.01142e+06	1.0263e+07	1.03371e+07	1.01231e+07	10628798	1.04905e+07	8.99817e+06	2.71886e+07	1.42431e+07	13656357	1.46987e+07	1.16376e+07	1.14377e+07	1.17356e+07	1.16438e+07	9.91061e+06	1.22239e+07	1.17259e+07	1.1581e+07	12974464	1.66607e+07	1.59109e+07	1.90435e+07	5.68822e+06	5.20085e+06	6.19836e+06	13579084	1.23553e+07	1.43769e+07	1.32246e+07	1.31013e+07	13823963	4.81864e+06	4.37744e+06	5.36239e+06	2.6666e+07	2.60409e+07	2.71434e+07	2.97037e+07	2.87195e+07	3.1889e+07	1.88562e+07	1.61086e+07	1.97694e+07	2.24453e+07	2.14526e+07	22925287	2.95884e+07
444000000	9.6532e+06	9.01182e+06	1.02638e+07	1.03377e+07	1.01236e+07	1.06294e+07	1.04913e+07	8.99862e+06	2.7209e+07	1.42442e+07	1.36573e+07	1.47002e+07	1.16383e+07	1.14382e+07	11736334	1.16446e+07	9.91089e+06	1.22248e+07	1.17267e+07	1.15817e+07	1.2976e+07	1.66625e+07	15912479	1.9048e+07	5.68842e+06	5.20097e+06	6.19867e+06	1.35802e+07	12355998	1.43786e+07	1.32257e+07	1.31023e+07	13825265	4.8188e+06	4.37755e+06	5.36264e+06	2.66705e+07	2.60448e+07	2.71483e+07	2.97096e+07	28724718	3.18977e+07	1.88583e+07	1.611e+07	1.97721e+07	2.24485e+07	2.14554e+07	2.29288e+07	2.95941e+07
445000000	9.65376e+06	9.01222e+06	1.02646e+07	1.03383e+07	1.01242e+07	1.06301e+07	1.04921e+07	8999070	2.72293e+07	1.42454e+07	1.36583e+07	1.47018e+07	1.16389e+07	1.14387e+07	1.1737e+07	1.16454e+07	9.91117e+06	1.22257e+07	1.17275e+07	1.15825e+07	1.29775e+07	1.66643e+07	1.5914e+07	1.90526e+07	5.68863e+06	5.2011e+06	6.19898e+06	1.35813e+07	1.23567e+07	1.43803e+07	1.32268e+07	1.31033e+07	1.38266e+07	4.81896e+06	4377664	5.36289e+06	2.66749e+07	2.60487e+07	2.71531e+07	2.97155e+07	2.873e+07	3.19065e+07	1.88605e+07	1.61113e+07	1.97747e+07	2.24516e+07	2.14583e+07	2.29323e+07	2.95997e+07
446000000	9.65432e+06	9.01262e+06	1.02654e+07	1.03389e+07	1.01247e+07	1.06307e+07	10492859	8.99952e+06	2.72496e+07	1.42465e+07	1.36592e+07	1.47033e+07	1.16396e+07	1.14392e+07	1.17377e+07	1.16462e+07	9911449	1.22267e+07	1.17282e+07	1.15832e+07	1.29791e+07	1.66661e+07	1.59155e+07	1.90571e+07	5.68883e+06	5.20123e+06	6.19928e+06	1.35825e+07	1.23575e+07	1.4382e+07	1.32278e+07	1.31043e+07	1.38279e+07	4.81912e+06	4377777	5.36314e+06	26679295	2.60527e+07	2.71579e+07	2.97214e+07	2.87352e+07	31915149	1.88626e+07	1.61127e+07	1.97773e+07	2.24547e+07	2.14611e+07	2.29357e+07	2.96054e+07
447000000	9.65488e+06	9.01302e+06	1.02662e+07	1.03394e+07	1.01253e+07	1.06313e+07	1.04936e+07	8.99996e+06	27269789	1.42477e+07	1.36602e+07	1.47049e+07	1.16403e+07	1.14397e+07	1.17384e+07	1.1647e+07	9.91173e+06	1.22276e+07	1.1729e+07	1.15839e+07	1.29806e+07	1.66679e+07	1.59171e+07	1.90616e+07	5.68904e+06	5.20135e+06	6.19959e+06	1.35836e+07	1.23582e+07	1.43837e+07	1.32289e+07	1.31053e+07	13829138	4.81928e+06	4.37789e+06	5.36339e+06	2.66837e+07	26056554	2.71627e+07	2.97273e+07	2.87404e+07	3.19238e+07	18864737	1.6114e+07	1.97798e+07	2.24577e+07	2.14639e+07	2.29392e+07	2.9611e+07
448000000	9.65543e+06	9.01342e+06	1.0267e+07	1.034e+07	1.01258e+07	1.06319e+07	1.04944e+07	9.0004e+06	27289947	1.42488e+07	1.36611e+07	1.47064e+07	1.16409e+07	1.14402e+07	1.17391e+07	1.16478e+07	9.912e+06	12228547	1.17298e+07	1.15847e+07	1.29821e+07	1.66697e+07	1.59186e+07	19066089	5.68924e+06	5.20147e+06	6.19989e+06	1.35847e+07	1.23589e+07	1.43853e+07	1.32299e+07	13106288	1.38304e+07	4.81944e+06	4.378e+06	5.36364e+06	2.6688e+07	2.60604e+07	2.71675e+07	2.97331e+07	2.87456e+07	3.19324e+07	1.88669e+07	16115335	1.97824e+07	2.24608e+07	2.14667e+07	2.29426e+07	2.96166e+07
449000000	9655979	9.01381e+06	1.02677e+07	1.03406e+07	1.01263e+07	1.06325e+07	1.04952e+07	9.00085e+06	2.73101e+07	1.42499e+07	1.36621e+07	1.47079e+07	1.16416e+07	1.14407e+07	1.17397e+07	1.16486e+07	9.91227e+06	1.22295e+07	1.17306e+07	1.15854e+07	1.29836e+07	1.66715e+07	1.59201e+07	1.90706e+07	5.68944e+06	5.2016e+06	6.20019e+06	1.35858e+07	1.23597e+07	1.4387e+07	1.32309e+07	13107279	1.38317e+07	4.8196e+06	4.37811e+06	5.36389e+06	2.66924e+07	2.60643e+07	2.71722e+07	2.9739e+07	2.87507e+07	3.1941e+07	1.8869e+07	1.61167e+07	1.9785e+07	2.24639e+07	2.14695e+07	2.29461e+07	2.96222e+07
450000000	9.65653e+06	9014208	1.02685e+07	1.03412e+07	1.01269e+07	1.06332e+07	10495911	9001285	2.73301e+07	1.42511e+07	1.3663e+07	1.47095e+07	1.16423e+07	1.14412e+07	1.17404e+07	1.16494e+07	9.91255e+06	1.22304e+07	1.17313e+07	1.15861e+07	1.29851e+07	1.66733e+07	1.59216e+07	1.9075e+07	5.68964e+06	5.20172e+06	6200490	1.35869e+07	1.23604e+07	1.43887e+07	1.3232e+07	1.31083e+07	1.3833e+07	4.81975e+06	4.37822e+06	5.36413e+06	2.66967e+07	26068159	2.71769e+07	2.97447e+07	2.87558e+07	31949596	18871077	1.6118e+07	1.97875e+07	2.24669e+07	2.14723e+07	2.29495e+07	2.96278e+07
451000000	9.65707e+06	9.0146e+06	1.02693e+07	1.03418e+07	1.01274e+07	1.06338e+07	1.04967e+07	9.00172e+06	2.73501e+07	1.42522e+07	1.3664e+07	1.4711e+07	1.16429e+07	1.14417e+07	1.17411e+07	1.16501e+07	9.91282e+06	1.22313e+07	1.17321e+07	1.15868e+07	12986604	1.66751e+07	1.59231e+07	1.90795e+07	5.68984e+06	5.20184e+06	6.20079e+06	13588011	1.23611e+07	1.43903e+07	1.3233e+07	1.31092e+07	1.38342e+07	4.81991e+06	4.37833e+06	5.36438e+06	2.6701e+07	2.6072e+07	2.71816e+07	2.97505e+07	2.8761e+07	3.19581e+07	1.88732e+07	1.61193e+07	19790060	2.247e+07	2.14751e+07	2.29529e+07	29633336
452000000	9.65762e+06	9.01499e+06	1.02701e+07	10342323	1.0128e+07	1.06344e+07	1.04974e+07	9.00216e+06	2.73701e+07	1.42533e+07	1.36649e+07	1.47125e+07	1.16436e+07	1.14422e+07	1.17418e+07	11650920	9.91309e+06	1.22322e+07	1.17329e+07	1.15876e+07	1.29881e+07	1.66769e+07	1.59246e+07	1.90839e+07	5.69004e+06	5.20196e+06	6.20109e+06	1.35891e+07	1.23618e+07	1.4392e+07	1.3234e+07	1.31102e+07	1.38355e+07	4.82007e+06	4.37844e+06	5.36462e+06	2.67053e+07	2.60758e+07	2.71863e+07	2.97563e+07	2.87661e+07	3.19666e+07	1.88753e+07	1.61206e+07	1.97926e+07	2.2473e+07	2.14778e+07	2.29562e+07	2.96389e+07
453000000	9.65816e+06	9.01538e+06	1.02708e+07	1.03429e+07	1.01285e+07	1.0635e+07	10498166	9002591	2.739e+07	14254394	13665810	1.4714e+07	1.16442e+07	1.14426e+07	1.17424e+07	1.16517e+07	9.91336e+06	1.22331e+07	1.17336e+07	1.15883e+07	1.29896e+07	1.66786e+07	1.5926e+07	1.90883e+07	5.69024e+06	5.20208e+06	6.20138e+06	1.35902e+07	1.23625e+07	1.43936e+07	13235067	1.31112e+07	1.38367e+07	4.82022e+06	4.37855e+06	5.36487e+06	2.67096e+07	2.60796e+07	27191000	2.9762e+07	2.87711e+07	3.19751e+07	1.88773e+07	1.61219e+07	1.97951e+07	2.2476e+07	2.14806e+07	2.29596e+07	2.96444e+07
454000000	9.6587e+06	9.01576e+06	1.02716e+07	1.03435e+07	1.0129e+07	1.06356e+07	1.04989e+07	9.00302e+06	2.74098e+07	1.42555e+07	1.36667e+07	1.47155e+07	1.16449e+07	1.14431e+07	1.17431e+07	1.16525e+07	9.91362e+06	1.2234e+07	1.17344e+07	1.1589e+07	12991057	1.66804e+07	15927508	1.90927e+07	5.69044e+06	5.2022e+06	6.20168e+06	1.35913e+07	1.23632e+07	1.43953e+07	1.32361e+07	13112171	13837987	4.82038e+06	4.37866e+06	5.36511e+06	26713835	2.60834e+07	2.71957e+07	2.97677e+07	28776182	3.19836e+07	1.88794e+07	1.61232e+07	1.97976e+07	2.2479e+07	2.14833e+07	2.2963e+07	2.96498e+07
455000000	9.65923e+06	9.01615e+06	1.02723e+07	1.0344e+07	10129543	1.06362e+07	1.04997e+07	9.00345e+06	2.74296e+07	1.42566e+07	1.36677e+07	1.4717e+07	1.16455e+07	1.14436e+07	1.17437e+07	1.16532e+07	9.91389e+06	1.22349e+07	1.17352e+07	1.15897e+07	1.29925e+07	1.66821e+07	1.5929e+07	1.90971e+07	5.69063e+06	5.20232e+06	6.20197e+06	13592362	1.23639e+07	1.43969e+07	1.32371e+07	1.31131e+07	1.38392e+07	4.82053e+06	4.37877e+06	5.36535e+06	2.67181e+07	2.60872e+07	2.72003e+07	2.97734e+07	2.87812e+07	31991965	1.88815e+07	1.61245e+07	19800116	2.2482e+07	2.1486e+07	2.29663e+07	2.96553e+07
456000000	9.65977e+06	9.01653e+06	1.02731e+07	1.03446e+07	10130069	1.06368e+07	1.05004e+07	9.00388e+06	2.74494e+07	1.42577e+07	13668568	1.47185e+07	1.16462e+07	1.14441e+07	1.17444e+07	1.1654e+07	9.91416e+06	1.22358e+07	1.17359e+07	11590395	1.2994e+07	1.66839e+07	1.59304e+07	1.91015e+07	5.69083e+06	5.20244e+06	6.20226e+06	1.35934e+07	1.23647e+07	1.43985e+07	1.32381e+07	13114099	1.38405e+07	4.82068e+06	4.37888e+06	5.36559e+06	2.67223e+07	2.60909e+07	2.72049e+07	2.9779e+07	2.87862e+07	3.20003e+07	1.88835e+07	1.61258e+07	1.98026e+07	2.24849e+07	2.14887e+07	2.29696e+07	2.96607e+07
457000000	9.6603e+06	9.01691e+06	1.02738e+07	1.03451e+07	1.01306e+07	1.06374e+07	1.05011e+07	9.00431e+06	2.74691e+07	1.42588e+07	1.36695e+07	1.47199e+07	1.16468e+07	1.14446e+07	1.17451e+07	1.16547e+07	9.91442e+06	1.22367e+07	1.17367e+07	1.15911e+07	1.29955e+07	1.66856e+07	1.59319e+07	1.91058e+07	5.69102e+06	5.20256e+06	6.20256e+06	1.35945e+07	1.23654e+07	1.44001e+07	1.32391e+07	1.31151e+07	13841701	4.82084e+06	4.37899e+06	5365827	2.67265e+07	2.60947e+07	2.72095e+07	2.97847e+07	2.87912e+07	3.20087e+07	1.88856e+07	1.6127e+07	1.98051e+07	2.24879e+07	2.14914e+07	2.2973e+07	2.96661e+07
458000000	9.66083e+06	9.01729e+06	10274583	1.03457e+07	1.01311e+07	1.0638e+07	1.05019e+07	9.00473e+06	2.74887e+07	1.42599e+07	1.36704e+07	1.47214e+07	1.16474e+07	1.14451e+07	1.17457e+07	1.16555e+07	9.91468e+06	1.22376e+07	1.17374e+07	11591795	1.29969e+07	1.66874e+07	1.59333e+07	1.91102e+07	5.69122e+06	5.20268e+06	6.20285e+06	1.35956e+07	1.23661e+07	14401758	1.32401e+07	1.3116e+07	1.38429e+07	4820990	4.3791e+06	5.36606e+06	2.67307e+07	2.60984e+07	2.72141e+07	2.97903e+07	28796196	3.2017e+07	1.88876e+07	1.61283e+07	1.98076e+07	2.24908e+07	2.14941e+07	2.29763e+07	2.96715e+07
459000000	9.66136e+06	9.01767e+06	1.02753e+07	1.03463e+07	1.01316e+07	1.06386e+07	1.05026e+07	9005153	2.75083e+07	1.42609e+07	1.36713e+07	1.47229e+07	1.16481e+07	11445532	1.17464e+07	1.16562e+07	9.91494e+06	1.22385e+07	1.17381e+07	1.15925e+07	1.29984e+07	1.66891e+07	1.59348e+07	1.91145e+07	5.69141e+06	5.2028e+06	6.20313e+06	1.35966e+07	1.23667e+07	1.44034e+07	1.32411e+07	1.3117e+07	1.38442e+07	4.82114e+06	4.3792e+06	5.3663e+06	2.67349e+07	2.61021e+07	2.72186e+07	29795879	2.88011e+07	3.20253e+07	1.88896e+07	1.61296e+07	1.981e+07	22493769	2.14968e+07	2.29796e+07	2.96769e+07
460000000	9661881	9.01805e+06	1.02761e+07	1.03468e+07	1.01322e+07	10639174	1.05033e+07	9.00557e+06	2.75279e+07	14262024	1.36722e+07	1.47243e+07	1.16487e+07	1.1446e+07	11747006	1.1657e+07	9915203	12239398	1.17389e+07	1.15932e+07	1.29998e+07	1.66908e+07	1.59362e+07	1.91188e+07	5.6916e+06	5202917	6.20342e+06	1.35977e+07	1.23674e+07	1.4405e+07	1.32421e+07	1.31179e+07	1.38454e+07	4.82129e+06	4.37931e+06	5366537	2.6739e+07	2.61058e+07	2.72232e+07	2.98014e+07	2.88061e+07	3.20336e+07	1.88916e+07	1.61308e+07	1.98125e+07	2.24967e+07	2.14995e+07	2.29828e+07	29682239
461000000	9662404	9.01842e+06	10276805	1.03474e+07	1.01327e+07	1.06398e+07	1.0504e+07	9.00599e+06	2.75474e+07	1.42631e+07	1.36731e+07	1.47258e+07	1.16493e+07	1.14465e+07	11747649	1.16577e+07	9.91546e+06	1.22403e+07	1.17396e+07	11593873	1.30012e+07	1.66925e+07	1.59377e+07	1.91231e+07	5.69179e+06	5.20303e+06	6.20371e+06	1.35988e+07	1.23681e+07	1.44066e+07	1.32431e+07	1.31188e+07	13846582	4.82144e+06	4.37941e+06	5.36677e+06	2.67432e+07	2.61095e+07	2.72277e+07	2.9807e+07	2.8811e+07	3.20418e+07	1.88937e+07	1.61321e+07	1.98149e+07	2.24996e+07	2.15021e+07	2.29861e+07	2.96876e+07
462000000	9.66292e+06	9.0188e+06	1.02775e+07	1.03479e+07	1.01332e+07	1.06403e+07	10504762	9.00641e+06	2.75668e+07	1.42642e+07	1.3674e+07	1.47272e+07	1.165e+07	11446944	1.17483e+07	1.16585e+07	9.91572e+06	1.22412e+07	1.17404e+07	1.15946e+07	1.30027e+07	1.66942e+07	1.59391e+07	1.91274e+07	5.69198e+06	5.20315e+06	6.20399e+06	13599803	1.23688e+07	1.44081e+07	1.32441e+07	1.31198e+07	1.38478e+07	4.82159e+06	4.37952e+06	5.36701e+06	2.67473e+07	2.61131e+07	2.72322e+07	2.98125e+07	2.88159e+07	3.205e+07	1.88957e+07	1.61334e+07	1.98173e+07	2.25025e+07	2.15048e+07	2.29893e+07	2.96929e+07
463000000	9.66344e+06	9.01917e+06	1.02783e+07	1.03484e+07	1.01337e+07	1.06409e+07	1.05055e+07	9.00682e+06	2.75862e+07	1.42652e+07	13674869	14728687	1.16506e+07	1.14474e+07	11748927	1.16592e+07	9915976	1.2242e+07	1.17411e+07	1.15952e+07	1.30041e+07	16695895	1.59405e+07	1.91317e+07	5.69217e+06	5.20327e+06	6.20428e+06	1.36008e+07	1.23695e+07	1.44097e+07	1.32451e+07	1.31207e+07	1.3849e+07	4.82174e+06	4.37962e+06	5.36724e+06	2.67514e+07	2.61168e+07	2.72367e+07	2.9818e+07	2.88208e+07	3.20582e+07	1.88977e+07	1.61346e+07	1.98197e+07	2.25054e+07	2.15074e+07	2.29926e+07	2.96982e+07
464000000	9.66396e+06	9.01954e+06	1.0279e+07	1.0349e+07	1.01342e+07	10641508	1.05062e+07	9.00724e+06	2.76056e+07	1.42663e+07	1.36758e+07	1.47301e+07	1.16512e+07	1.14479e+07	1.17496e+07	1.16599e+07	9.91623e+06	1.22429e+07	1.17418e+07	11595925	1.30055e+07	1.66976e+07	1.59419e+07	1.91359e+07	5692362	5.20338e+06	6.20456e+06	1.36019e+07	1.23702e+07	1.44113e+07	1.3246e+07	1.31217e+07	1.38502e+07	4.82189e+06	4.37973e+06	5.36747e+06	2.67555e+07	2.61204e+07	2.72412e+07	2.98235e+07	2.88256e+07	3.20664e+07	1.88996e+07	1.61358e+07	19822150	2.25083e+07	2.151e+07	2.29958e+07	2.97034e+07
465000000	9.66447e+06	9.01991e+06	1.02797e+07	1.03495e+07	1.01347e+07	1.06421e+07	1.05069e+07	9.00765e+06	2.76249e+07	1.42673e+07	1.36766e+07	1.47316e+07	1.16518e+07	1.14483e+07	1.17502e+07	1.16607e+07	9.91649e+06	12243760	11742531	1.15966e+07	13006941	1.66993e+07	1.59433e+07	19140184	5.69255e+06	5.2035e+06	6.20484e+06	1.36029e+07	1.23709e+07	1.44129e+07	1.3247e+07	1.31226e+07	1.38514e+07	4.82204e+06	4.37983e+06	5.3677e+06	2.67595e+07	2.6124e+07	2.72456e+07	2.9829e+07	2.88305e+07	32074481	1.89016e+07	1.61371e+07	19824549	2.25111e+07	2.15127e+07	22999022	29708670
466000000	9.66499e+06	9.02027e+06	1.02804e+07	1.03501e+07	1.01352e+07	1.06427e+07	1.05076e+07	9.00806e+06	2.76442e+07	1.42684e+07	1.36775e+07	1.4733e+07	1.16524e+07	1.14488e+07	1.17508e+07	1.16614e+07	9.91674e+06	1.22446e+07	1.17433e+07	1.15973e+07	1.30084e+07	1.67009e+07	1.59447e+07	1.91444e+07	5.69274e+06	5.20361e+06	6.20512e+06	1.3604e+07	1.23715e+07	14414437	1.3248e+07	1.31235e+07	1.38526e+07	4.82218e+06	4.37994e+06	5.36793e+06	2.67636e+07	26127638	2.72501e+07	2.98344e+07	2.88353e+07	3.20826e+07	1.89036e+07	1.61383e+07	1.98269e+07	2.2514e+07	2.15153e+07	2.30022e+07	2.97139e+07
467000000	9.6655e+06	9.02064e+06	1.02812e+07	1.03506e+07	1.01357e+07	1.06432e+07	1.05083e+07	9.00847e+06	2.76634e+07	1.42694e+07	1.36784e+07	1.47344e+07	1.16531e+07	1.14493e+07	1.17515e+07	1.16621e+07	9.91699e+06	1.22455e+07	1.1744e+07	1.1598e+07	1.30098e+07	1.67026e+07	1.59461e+07	1.91486e+07	5.69292e+06	5203725	6.2054e+06	1.3605e+07	1.23722e+07	1.4416e+07	1.32489e+07	1.31244e+07	1.38538e+07	4.82233e+06	4.38004e+06	5.36816e+06	26767646	2.61312e+07	27254508	2.98398e+07	2.88401e+07	3.20906e+07	1.89055e+07	1.61395e+07	1.98293e+07	2.25168e+07	2.15179e+07	2.30054e+07	2.97191e+07
468000000	9.666e+06	9.021e+06	1.02819e+07	10351138	1.01362e+07	10643803	1.0509e+07	9.00888e+06	27682550	1.42705e+07	1.36793e+07	1.47358e+07	1.16537e+07	1.14497e+07	1.17521e+07	1.16628e+07	9.91724e+06	12246334	1.17447e+07	1.15986e+07	1.30112e+07	16704261	1.59475e+07	1.91528e+07	5.69311e+06	5.20384e+06	6.20568e+06	1.3606e+07	1.23729e+07	1.44175e+07	1.32499e+07	1.31253e+07	1.38549e+07	4.82248e+06	4.38014e+06	5368387	2.67717e+07	2.61348e+07	2.72589e+07	2.98452e+07	2.88449e+07	3.20987e+07	1.89075e+07	1.61408e+07	1.98317e+07	2.25197e+07	2.15204e+07	23008584	29724284
469000000	9.66651e+06	9.02137e+06	1.02826e+07	1.03517e+07	1.01367e+07	1.06444e+07	1.05097e+07	9.00928e+06	2.77017e+07	1.42715e+07	1.36801e+07	14737236	1.16543e+07	1.14502e+07	1.17527e+07	1.16636e+07	9.91749e+06	12247185	1.17454e+07	1.15993e+07	13012550	16705914	1.59489e+07	1.9157e+07	5.69329e+06	5.20395e+06	6.20596e+06	1.3607e+07	1.23735e+07	1.44191e+07	1.32509e+07	1.31262e+07	1.38561e+07	4.82262e+06	4.38025e+06	5368614	2.67757e+07	26138360	2.72633e+07	29850629	2.88496e+07	3.21067e+07	18909444	1.6142e+07	1.9834e+07	2.25225e+07	2.1523e+07	2.30117e+07	2.97294e+07
470000000	9.66701e+06	9.02173e+06	1.02833e+07	1.03522e+07	1.01372e+07	1.06449e+07	1.05104e+07	9.00968e+06	2.77207e+07	14272546	1.3681e+07	1.47386e+07	1.16549e+07	11450616	1.17533e+07	1.16643e+07	9.91774e+06	1.2248e+07	1.17461e+07	1.16e+07	1.30139e+07	1.67076e+07	1.59503e+07	1.91612e+07	5.69348e+06	5204064	6.20623e+06	1.3608e+07	1.23742e+07	1.44206e+07	1.32518e+07	1.31272e+07	1.38573e+07	4.82277e+06	4.38035e+06	5368840	2.67797e+07	2.61419e+07	2.72677e+07	29855989	2.88544e+07	3.21147e+07	1.89114e+07	1.61432e+07	1.98364e+07	2.25253e+07	2.15256e+07	2.30149e+07	2.97346e+07
471000000	9.66752e+06	9.02209e+06	1.0284e+07	1.03527e+07	1.01377e+07	1.06455e+07	1.05111e+07	9.01009e+06	2.77398e+07	1.42736e+07	1.36818e+07	14740042	1.16555e+07	1.14511e+07	1.17539e+07	1.1665e+07	9.91799e+06	1.22489e+07	1.17468e+07	1.16006e+07	1.30153e+07	1.67092e+07	1.59517e+07	19165371	5.69366e+06	5204176	6.20651e+06	1.36091e+07	1.23749e+07	1.44222e+07	1.32528e+07	1.31281e+07	1.38584e+07	4.82291e+06	4.38045e+06	5369065	2.67837e+07	2.61454e+07	2.7272e+07	2.98613e+07	2.88591e+07	3.21226e+07	1.89133e+07	16144399	1.98387e+07	2.25281e+07	2.15281e+07	2.3018e+07	2.97397e+07
472000000	9.66802e+06	9.02245e+06	1.02847e+07	1.03533e+07	1.01382e+07	1.06461e+07	1.05118e+07	9.01049e+06	2.77587e+07	1.42746e+07	1.36827e+07	14741437	1.16561e+07	1.14515e+07	1.17545e+07	1.16657e+07	9.91823e+06	12249717	1.17475e+07	1.16013e+07	1.30167e+07	1.67108e+07	1.5953e+07	1.91695e+07	5.69385e+06	5.20429e+06	6.20678e+06	1.36101e+07	1.23755e+07	1.44237e+07	1.32537e+07	1.3129e+07	13859601	4.82305e+06	4.38055e+06	5.36929e+06	2.67876e+07	2.6149e+07	2.72764e+07	2.98666e+07	2.88638e+07	3.21305e+07	1.89152e+07	1.61456e+07	1.98411e+07	2.25309e+07	2.15307e+07	2.30212e+07	2.97448e+07
473000000	9.66851e+06	9.0228e+06	1.02854e+07	1.03538e+07	1.01387e+07	1.06466e+07	1.05125e+07	9.01088e+06	2.77777e+07	1.42756e+07	1.36836e+07	1.47428e+07	1.16567e+07	11451959	1.17552e+07	1.16664e+07	9.91848e+06	1.22506e+07	1.17482e+07	1.16019e+07	1.30181e+07	16712460	1.59544e+07	1.91737e+07	5.69403e+06	5.2044e+06	6.20705e+06	13611070	1.23762e+07	1.44252e+07	1.32547e+07	1.31299e+07	1.38608e+07	4.8232e+06	4.38065e+06	5.36951e+06	2.67916e+07	26152459	2.72807e+07	2.98719e+07	2.88685e+07	3.21384e+07	1.89171e+07	1.61468e+07	1.98434e+07	2.25336e+07	2.15332e+07	23024273	2.97499e+07
474000000	9.66901e+06	9.02316e+06	1.02861e+07	1.03543e+07	1.01392e+07	10647175	10513243	9.01128e+06	2.77965e+07	1.42766e+07	1.36844e+07	1.47442e+07	1.16573e+07	1.14524e+07	1.17558e+07	1.16671e+07	9.91872e+06	1.22514e+07	1.17489e+07	1.16026e+07	13019441	1.67141e+07	1.59558e+07	1.91778e+07	5.69421e+06	5.20451e+06	6.20732e+06	1.36121e+07	1.23768e+07	14426728	1.32556e+07	1.31307e+07	1.38619e+07	4823340	4.38075e+06	5.36973e+06	2.67955e+07	26155949	2.7285e+07	2.98772e+07	28873174	3.21463e+07	1.89191e+07	1.6148e+07	1.98457e+07	2.25364e+07	2.15357e+07	2.30274e+07	2.9755e+07
475000000	9.6695e+06	9.02351e+06	1.02868e+07	1.03548e+07	1.01397e+07	1.06477e+07	1.05139e+07	9.01168e+06	2.78154e+07	1.42776e+07	1.36853e+07	14745590	1.16579e+07	1.14528e+07	1.17564e+07	1.16678e+07	9.91896e+06	1.22522e+07	1.17496e+07	1.16032e+07	1.30208e+07	16715694	1.59571e+07	1.91819e+07	5.69439e+06	5.20462e+06	6.20759e+06	1.36131e+07	1.23775e+07	14428238	1.32565e+07	1.31316e+07	1.38631e+07	4.82348e+06	4.38085e+06	5.36996e+06	2.67994e+07	2.61594e+07	2.72893e+07	29882485	2.88778e+07	3.21542e+07	1.8921e+07	1.61492e+07	1.9848e+07	2.25392e+07	2.15382e+07	2.30305e+07	29760024
476000000	9.66999e+06	9.02386e+06	1.02875e+07	1.03553e+07	1.01401e+07	1.06483e+07	1.05146e+07	9.01207e+06	2.78342e+07	1.42787e+07	1.36861e+07	1.4747e+07	1.16585e+07	1.14533e+07	1.1757e+07	1.16685e+07	9.91921e+06	1.2253e+07	1.17503e+07	1.16039e+07	1.30222e+07	1.67173e+07	15958451	1.9186e+07	5.69457e+06	5.20473e+06	6.20786e+06	1.36141e+07	12378137	1.44297e+07	1.32575e+07	1.31325e+07	1.38642e+07	4.82362e+06	4.38095e+06	5.37018e+06	2.68033e+07	2.61629e+07	2.72935e+07	2.98877e+07	2.88825e+07	3.2162e+07	1.89228e+07	1.61504e+07	19850316	2.25419e+07	2.15407e+07	2.30335e+07	2.97651e+07
477000000	9.67048e+06	9.02421e+06	10288208	1.03558e+07	1.01406e+07	1.06488e+07	1.05153e+07	9.01246e+06	2.78529e+07	1.42797e+07	1.36869e+07	1.47483e+07	11659061	1.14537e+07	1.17576e+07	1.16692e+07	9.91945e+06	1.22539e+07	1.1751e+07	1.16045e+07	1.30235e+07	1.67189e+07	1.59598e+07	1.91901e+07	5.69475e+06	5.20484e+06	6.20813e+06	1.3615e+07	1.23788e+07	1.44312e+07	1.32584e+07	1.31334e+07	1.38653e+07	4.82376e+06	4.38105e+06	5.3704e+06	2.68072e+07	2.61663e+07	2.72978e+07	2.98929e+07	2.88871e+07	3.21698e+07	1.89247e+07	1.61515e+07	1.98526e+07	2.25446e+07	2.15432e+07	2.30366e+07	2.97701e+07
478000000	9.67097e+06	9024562	1.02889e+07	1.03564e+07	1.01411e+07	1.06494e+07	1.0516e+07	9.01285e+06	2.78716e+07	1.42807e+07	13687771	14749696	1.16596e+07	1.14542e+07	1.17582e+07	1.16699e+07	9.91969e+06	1.22547e+07	1.17517e+07	1.16052e+07	1.30249e+07	1.67205e+07	1.59611e+07	1.91942e+07	5.69493e+06	5.20495e+06	6.2084e+06	1.3616e+07	1.23794e+07	1.44327e+07	1.32593e+07	1.31343e+07	1.38665e+07	4.8239e+06	4.38115e+06	5.37061e+06	2.68111e+07	2.61698e+07	2.7302e+07	2.98981e+07	2.88917e+07	32177538	1.89266e+07	1.61527e+07	1.98549e+07	2.25474e+07	2.15457e+07	2.30397e+07	2.97751e+07
479000000	9.67146e+06	9.02491e+06	1.02896e+07	1.03569e+07	1.01416e+07	1.06499e+07	1.05167e+07	9.01324e+06	27890252	1.42817e+07	1.36886e+07	1.47511e+07	1.16602e+07	1.14546e+07	1.17588e+07	1.16706e+07	9.91993e+06	1.22555e+07	1.17524e+07	1.16058e+07	1.30262e+07	1.67221e+07	1.59625e+07	1.91982e+07	5.6951e+06	5.20506e+06	6.20866e+06	1.3617e+07	1.23801e+07	1.44342e+07	13260227	1.31352e+07	13867591	4.82404e+06	4.38125e+06	5.37083e+06	2.68149e+07	2.61732e+07	2.73063e+07	2.99033e+07	2.88963e+07	3.21853e+07	1.89285e+07	16153883	1.98572e+07	2.25501e+07	2.15482e+07	2.30427e+07	2.978e+07
480000000	9.67194e+06	9025256	1.02903e+07	1.03574e+07	1.01421e+07	1.06505e+07	1.05174e+07	9.01363e+06	2.79089e+07	1.42826e+07	1.36894e+07	1.47524e+07	1.16608e+07	1.1455e+07	1.17594e+07	1.16713e+07	9.92016e+06	1.22563e+07	1.1753e+07	1.16064e+07	1.30275e+07	1.67237e+07	1.59638e+07	1.92023e+07	5.69528e+06	5.20516e+06	6.20893e+06	1.3618e+07	1.23807e+07	1.44357e+07	1.32611e+07	1.3136e+07	1.38687e+07	4.82418e+06	4381343	5.37105e+06	2.68188e+07	2.61766e+07	2.73105e+07	2.99085e+07	2.89008e+07	3.2193e+07	1.89303e+07	1.6155e+07	1.98594e+07	22552760	2.15506e+07	2.30457e+07	2.9785e+07
481000000	9.67242e+06	9.0256e+06	1.02909e+07	1.03579e+07	1.01425e+07	1.0651e+07	1.05181e+07	9.01401e+06	2.79274e+07	1.42836e+07	1.36903e+07	1.47538e+07	1.16614e+07	1.14555e+07	1.176e+07	1.1672e+07	9.9204e+06	1.22571e+07	1.17537e+07	1.16071e+07	1.30289e+07	1.67252e+07	1.59651e+07	1.92063e+07	5.69546e+06	5.20527e+06	6.20919e+06	1.3619e+07	12381339	1.44372e+07	1.32621e+07	1.31369e+07	1.38698e+07	4.82432e+06	4.38144e+06	5.37127e+06	26822604	2.618e+07	2.73147e+07	2.99136e+07	2.89054e+07	3.22007e+07	1.89322e+07	1.61562e+07	1.98617e+07	2.25554e+07	2.15531e+07	2.30488e+07	2.97899e+07
482000000	9.6729e+06	9.02594e+06	1.02916e+07	1.03584e+07	1.0143e+07	1.06515e+07	1.05187e+07	9.0144e+06	2.79459e+07	1.42846e+07	1.36911e+07	1.47551e+07	1.1662e+07	1.14559e+07	1.17606e+07	1.16726e+07	9.92063e+06	1.22579e+07	11754391	11607716	1.30302e+07	1.67268e+07	15966422	1.92103e+07	5.69563e+06	5.20538e+06	6.20946e+06	1.36199e+07	1.2382e+07	1.44386e+07	1.3263e+07	1.31378e+07	13870948	4.82446e+06	4.38154e+06	5.37148e+06	2.68264e+07	2.61834e+07	2.73188e+07	2.99187e+07	2.89099e+07	3.22083e+07	1.8934e+07	1.61574e+07	1.98639e+07	2.25581e+07	21555545	2.30518e+07	2.97948e+07
483000000	9673378	9.02629e+06	1.02923e+07	1.03589e+07	1.01435e+07	1.06521e+07	1.05194e+07	9014778	2.79644e+07	1.42856e+07	1.36919e+07	1.47564e+07	11662546	1.14563e+07	11761139	1.16733e+07	9920869	1.22587e+07	1.17551e+07	11608346	1.30315e+07	16728377	1.59677e+07	1.92143e+07	5.69581e+06	5.20548e+06	6.20972e+06	1.36209e+07	1.23826e+07	1.44401e+07	1.32639e+07	1.31386e+07	1.38721e+07	4.82459e+06	4.38163e+06	5371695	2.68302e+07	26186753	2.7323e+07	2.99239e+07	2.89144e+07	32215968	1.89359e+07	1.61585e+07	19866141	2.25608e+07	2.1558e+07	2.30548e+07	2.97997e+07
484000000	9.67385e+06	9.02663e+06	1.0293e+07	1.03594e+07	1.01439e+07	1.06526e+07	1.05201e+07	9.01516e+06	2.79828e+07	1.42866e+07	1.36927e+07	1.47578e+07	1.16631e+07	1.14567e+07	1.17617e+07	1.1674e+07	9.9211e+06	1.22595e+07	1.17557e+07	1.1609e+07	1.30328e+07	1.67299e+07	15969037	1.92183e+07	5.69598e+06	5.20559e+06	6.20998e+06	1.36218e+07	1.23832e+07	1.44416e+07	1.32648e+07	1.31395e+07	13873164	4.82473e+06	4381730	5.37191e+06	26834000	2.61901e+07	2.73271e+07	29928936	2.89189e+07	3.22236e+07	1.89377e+07	1.61597e+07	1.98684e+07	2.25635e+07	21560405	2.30577e+07	2.98046e+07
485000000	9.67433e+06	9.02697e+06	1.02936e+07	1.03599e+07	1.01444e+07	1.06531e+07	1.05208e+07	9015538	2.80012e+07	1.42875e+07	13693528	14759098	11663689	1.14572e+07	1.17623e+07	1.16747e+07	9.92133e+06	1.22603e+07	1.17564e+07	1.16096e+07	1.30341e+07	1.67315e+07	1.59703e+07	1.92223e+07	5.69615e+06	5.2057e+06	6.21024e+06	1.36228e+07	1.23839e+07	1.4443e+07	13265665	1.31403e+07	1.38743e+07	4.82487e+06	4.38183e+06	5.37212e+06	2.68378e+07	2.61935e+07	2.73313e+07	2.9934e+07	2.89234e+07	3.22312e+07	1.89395e+07	1.61608e+07	1.98706e+07	2.25661e+07	2.15628e+07	2.30607e+07	2.98095e+07
486000000	9.6748e+06	9.0273e+06	1.02943e+07	1.03604e+07	1.01449e+07	1.06537e+07	10521429	9.01592e+06	2.80195e+07	14288517	1.36943e+07	1.47604e+07	11664257	1.14576e+07	1.17629e+07	1.16753e+07	9921566	1.22611e+07	11757065	1.16102e+07	1.30355e+07	1.6733e+07	1.59716e+07	1.92263e+07	5.69633e+06	5.2058e+06	6.2105e+06	1.36238e+07	1.23845e+07	14444475	1.32666e+07	1.31412e+07	1.38754e+07	4.825e+06	4.38192e+06	5.37233e+06	2.68415e+07	2.61968e+07	27335376	2.9939e+07	2.89279e+07	3.22387e+07	18941357	1.61619e+07	1.98728e+07	2.25687e+07	2.15652e+07	2.30637e+07	29814304
487000000	9.67527e+06	9.02764e+06	1.0295e+07	1.03609e+07	1.01453e+07	1.06542e+07	1.05221e+07	9.01629e+06	28037816	1.42895e+07	1.36951e+07	1.47617e+07	1.16648e+07	1.1458e+07	11763464	1.1676e+07	9.9218e+06	1.22619e+07	1.17577e+07	1.16108e+07	1.30368e+07	1.67346e+07	1.59729e+07	1.92302e+07	5.6965e+06	5.20591e+06	6.21075e+06	1.36247e+07	1.23851e+07	14445918	1.32674e+07	1.3142e+07	1.38765e+07	4.82514e+06	4.38202e+06	5.37254e+06	2.68453e+07	2.62001e+07	2.73395e+07	2.99441e+07	2.89323e+07	3.22462e+07	1.89432e+07	1.61631e+07	1.9875e+07	2.25714e+07	2.15676e+07	2.30666e+07	2.98191e+07
488000000	9.67574e+06	9.02798e+06	1.02956e+07	1.03614e+07	1.01458e+07	1.06547e+07	1.05228e+07	9.01667e+06	2.80561e+07	1.42904e+07	1.36959e+07	1.47631e+07	1.16654e+07	1.14584e+07	1.1764e+07	1.16767e+07	9.92203e+06	1.22627e+07	1.17584e+07	1.16115e+07	1.30381e+07	1.67361e+07	1.59742e+07	1.92342e+07	5.69667e+06	5.20601e+06	6.21101e+06	1.36256e+07	1.23857e+07	1.44474e+07	1.32683e+07	1.31429e+07	1.38775e+07	4825271	4.38211e+06	5.37275e+06	2.6849e+07	2.62034e+07	2.73436e+07	2.99491e+07	2.89367e+07	3.22538e+07	1.8945e+07	1.61642e+07	19877184	2.2574e+07	2.157e+07	2.30696e+07	29823935
489000000	9.6762e+06	9.02831e+06	1.02963e+07	1.03619e+07	1.01462e+07	10655252	1.05234e+07	9.01704e+06	2.80743e+07	1.42914e+07	1.36967e+07	1.47644e+07	1.16659e+07	1.14588e+07	1.17646e+07	1.16773e+07	9922254	1.22635e+07	1.1759e+07	1.16121e+07	1.30393e+07	1.67376e+07	1.59755e+07	1.92381e+07	5.69684e+06	5.20611e+06	6211265	1.36266e+07	1.23863e+07	14448788	1.32692e+07	1.31437e+07	1.38786e+07	4.8254e+06	4.3822e+06	5.37296e+06	2.68527e+07	2.62067e+07	27347622	2.99541e+07	28941161	3.22612e+07	1.89468e+07	1.61653e+07	1.98794e+07	2.25766e+07	2.15724e+07	2.30725e+07	2.98287e+07
490000000	9676669	9.02864e+06	1.0297e+07	1.03623e+07	1.01467e+07	1.06558e+07	10524072	9.01741e+06	2.80924e+07	1.42924e+07	1.36975e+07	1.47657e+07	1.16665e+07	1.14592e+07	1.17652e+07	1.1678e+07	9.92248e+06	1.22643e+07	1.17597e+07	1.16127e+07	1.30406e+07	1.67392e+07	1.59768e+07	1.9242e+07	5.69701e+06	5.20622e+06	6.21152e+06	13627529	1.23869e+07	14450215	1.32701e+07	1.31446e+07	1.38797e+07	4.82554e+06	4.3823e+06	5.37317e+06	2.68564e+07	26209981	2.73517e+07	2.9959e+07	2.89456e+07	3.22687e+07	1.89486e+07	1.61664e+07	1.98815e+07	2.25792e+07	2.15748e+07	2.30754e+07	2.98335e+07
491000000	9.67713e+06	9.02897e+06	1.02976e+07	1.03628e+07	1.01472e+07	1.06563e+07	1.05247e+07	9.01778e+06	2.81105e+07	14293303	1.36983e+07	1.4767e+07	1.16671e+07	1.14597e+07	1.17658e+07	1.16787e+07	9.92271e+06	1.22651e+07	1.17603e+07	1.16133e+07	1.30419e+07	16740669	1.5978e+07	1.92459e+07	5.69718e+06	5.20632e+06	6.21177e+06	1.36285e+07	1.23876e+07	1.44516e+07	1.3271e+07	1.31454e+07	1.38808e+07	4.82567e+06	4.38239e+06	5.37338e+06	2.68601e+07	2.62132e+07	2.73557e+07	2.9964e+07	2.89499e+07	3.22761e+07	1.89503e+07	1.61676e+07	1.98837e+07	2.25818e+07	2.15771e+07	2.30783e+07	2.98382e+07
492000000	9.67759e+06	9.0293e+06	1.02983e+07	1.03633e+07	1.01476e+07	1.06568e+07	10525378	9.01815e+06	2.81286e+07	14294249	1.36991e+07	1.47683e+07	1.16676e+07	1.14601e+07	1.17663e+07	1.16793e+07	9.92293e+06	1.22658e+07	1.1761e+07	1.16139e+07	1.30432e+07	1.67422e+07	1.59793e+07	1.92498e+07	5.69735e+06	5206424	6212025	1.36294e+07	1.23882e+07	1.44531e+07	1.32718e+07	1.31462e+07	1.38819e+07	4.8258e+06	4.38249e+06	5.37359e+06	2.68638e+07	2.62165e+07	2.73597e+07	2.9969e+07	2.89543e+07	3.22835e+07	18952120	1.61687e+07	19885867	2.25844e+07	2.15795e+07	2.30812e+07	2.9843e+07
493000000	9.67805e+06	9029632	1.02989e+07	1.03638e+07	1.01481e+07	10657325	1.0526e+07	9.01852e+06	2.81466e+07	1.42952e+07	1.36999e+07	1.47695e+07	1.16682e+07	1.14605e+07	1.17669e+07	11679969	9.92316e+06	1.22666e+07	1.17616e+07	1.16145e+07	1.30445e+07	16743683	1.59806e+07	1.92537e+07	5.69751e+06	5.20653e+06	6.21228e+06	1.36303e+07	1.23888e+07	1.44545e+07	1.32727e+07	1.3147e+07	1.38829e+07	4.82593e+06	4382578	5.37379e+06	26867421	2.62197e+07	27363739	2.9974e+07	2.89587e+07	3.22909e+07	1.89539e+07	1.61698e+07	1.9888e+07	2.25869e+07	2.15818e+07	2.30841e+07	2.98477e+07
494000000	9.67851e+06	9.02996e+06	1.02996e+07	1.03643e+07	1.01485e+07	1.06578e+07	1.05267e+07	9.01888e+06	2.81646e+07	14296130	13700698	1.47708e+07	1.16687e+07	1.14609e+07	1.17674e+07	11680619	9923381	1.22674e+07	1.17623e+07	1.16151e+07	1.30457e+07	1.67452e+07	1.59818e+07	1.92576e+07	5.69768e+06	5.20663e+06	6.21253e+06	1.36312e+07	1.23894e+07	1.44559e+07	1.32736e+07	13147870	1.3884e+07	4.82606e+06	4.38267e+06	5.374e+06	2.68711e+07	2.6223e+07	2.73677e+07	2.99789e+07	2.8963e+07	3.22983e+07	1.89557e+07	1.61709e+07	19890159	2.25895e+07	2.15841e+07	2.3087e+07	2.98524e+07
495000000	9.67896e+06	9.03029e+06	10300199	1.03648e+07	1.0149e+07	1.06583e+07	1.05273e+07	9.01925e+06	2.81825e+07	14297065	1.37015e+07	1.47721e+07	1.16693e+07	11461280	1.1768e+07	1.16813e+07	9.9236e+06	1.22681e+07	1.17629e+07	1.16157e+07	1.3047e+07	16746674	1.59831e+07	1.92615e+07	5.69785e+06	5.20673e+06	6.21278e+06	1.36322e+07	1.239e+07	1.44573e+07	1.32744e+07	1.31487e+07	1.3885e+07	4.82619e+06	4.38276e+06	5.3742e+06	2.68747e+07	2.62262e+07	2.73717e+07	2.99839e+07	2.89673e+07	3.23056e+07	1.89574e+07	1.6172e+07	1.98923e+07	22592029	2.15865e+07	2.30898e+07	2.98571e+07
496000000	9679418	9.03061e+06	1.03008e+07	1.03652e+07	1.01494e+07	1.06589e+07	1.0528e+07	9.01961e+06	2.82004e+07	1.4298e+07	1.37023e+07	1.47734e+07	1.16698e+07	1.14617e+07	1.17686e+07	1.16819e+07	9923825	1.22689e+07	1.17636e+07	1.16163e+07	1.30483e+07	16748161	1.59843e+07	1.92653e+07	5.69801e+06	5.20683e+06	6.21302e+06	1.36331e+07	1.23906e+07	14458667	1.32753e+07	1.31495e+07	1.38861e+07	4.82632e+06	4.38285e+06	5.3744e+06	2.68783e+07	2.62294e+07	2.73757e+07	29988809	2.89716e+07	32312910	1.89592e+07	1.61731e+07	1.98944e+07	2.25946e+07	2.15888e+07	2.30927e+07	2.98618e+07
497000000	9.67987e+06	9.03093e+06	1.03015e+07	1.03657e+07	1.01499e+07	1.06594e+07	1.05286e+07	9.01997e+06	2.82183e+07	1.42989e+07	1.3703e+07	1.47747e+07	1.16704e+07	1.14621e+07	1.17691e+07	1.16826e+07	9.92405e+06	1.22697e+07	1.17642e+07	1.16169e+07	1.30495e+07	1.67496e+07	1.59855e+07	1.92692e+07	5.69818e+06	5.20693e+06	6213272	1.3634e+07	1.23912e+07	1.44601e+07	1.32762e+07	13150324	1.38872e+07	4.82645e+06	4.38295e+06	5374607	2.68819e+07	2.62326e+07	2.73796e+07	2.99937e+07	2.89759e+07	3.23202e+07	1.89609e+07	1.61742e+07	1.98965e+07	2.25971e+07	2.15911e+07	2.30955e+07	2.98664e+07
498000000	9680320	9.03126e+06	1.03021e+07	1.03662e+07	1.01503e+07	1.06599e+07	1.05292e+07	9.02033e+06	2.82361e+07	1.42998e+07	1.37038e+07	1.47759e+07	1.16709e+07	1.14625e+07	1.17697e+07	1.16832e+07	9.92427e+06	1.22704e+07	1.17648e+07	1.16175e+07	1.30508e+07	1.67511e+07	1.59868e+07	1.9273e+07	5.69834e+06	5.20703e+06	6.21352e+06	1.36349e+07	1.23918e+07	1.44614e+07	13277015	1.31511e+07	1.38882e+07	4.82658e+06	4383036	5.37481e+06	2.68855e+07	2.62358e+07	2.73836e+07	2.99986e+07	2.89802e+07	3.23275e+07	1.89626e+07	1.61752e+07	1.98986e+07	22599617	2.15934e+07	2.30984e+07	2.9871e+07
499000000	9.68077e+06	9.03158e+06	10302752	1.03666e+07	1.01507e+07	1.06604e+07	1.05299e+07	9020691	2.82539e+07	14300769	1.37046e+07	1.47772e+07	1.16714e+07	1.14629e+07	1.17702e+07	1.16838e+07	9.92448e+06	1.22712e+07	1.17655e+07	1.16181e+07	1.3052e+07	1.67526e+07	1.5988e+07	1.92768e+07	5.69851e+06	5.20713e+06	6.21376e+06	1.36358e+07	12392352	1.44628e+07	1.32779e+07	1.31519e+07	1.38892e+07	4.8267e+06	4.38313e+06	5375010	2.68891e+07	2.6239e+07	27387473	3.00035e+07	2.89844e+07	3.23347e+07	1.89644e+07	1.61763e+07	1.99007e+07	2.26021e+07	2.15957e+07	2.31012e+07	2.98757e+07
500000000	9681215	9.0319e+06	1.03034e+07	1.03671e+07	1.01512e+07	1.06609e+07	1.05305e+07	9.02105e+06	2.82716e+07	1.43017e+07	1.37053e+07	1.47784e+07	11671976	1.14633e+07	1.17708e+07	1.16845e+07	9.9247e+06	1.22719e+07	11766098	11618682	1.30533e+07	1.67541e+07	1.59892e+07	19280601	5.69867e+06	5.20723e+06	6.21401e+06	1.36367e+07	1.23929e+07	1.44642e+07	1.32787e+07	1.31527e+07	13890287	4.82683e+06	4.38322e+06	5.37521e+06	2.68926e+07	2.62421e+07	2.73914e+07	3.00083e+07	2.89886e+07	3.23419e+07	1.89661e+07	1.61774e+07	1.99028e+07	2.26046e+07	2.1598e+07	2.3104e+07	2.98803e+07
[truncated: 41 more columns]

## Sheet: SuppTableS6
Supplementary Table S6: Calibration curve for the creation of the wanted SPT density solution stocks.
Tube #	Total added SPT (gr)	Total added H2O (mL)	Ratio SPT/H2O	Measured empty tube weight	Measured weight tube + 1 mL H2O	Measured solution weight / Density	Ratio of SPT to H2O via function
			(y-axis on plot)			(x-axis on plot)
1	0.5	1	0.5	1.099	2.454	1.355	0.487191
2	0.8	1	0.8	1.09	2.627	1.537	0.792594
3	1	1	1	1.095	2.738	1.643	0.978585
4	1.25	1	1.25	1.1	2.887	1.787	1.24682
5	1.5	1	1.5	1.102	3.003	1.901	1.476
6	1.75	1	1.75	1.099	3.12	2.021	1.73741
7	2	1	2	1.094	3.209	2.115	1.95916
8	2.25	1	2.25	1.098	3.327	2.229	2.25111
9	2.5	1	2.5	1.097	3.402	2.305	2.46133
10	2.75	1	2.75	1.105	3.5	2.395	2.72803
11	3	1	3	1.096	3.568	2.472	2.97268
12	3.25	1	3.25	1.101	3.648	2.547	3.22664
13	3.5	1	3.5	1.093	3.709	2.616	3.47478
14	3.75	1	3.75	1.103	3.785	2.682	3.72586
15	4	1	4	1.104	3.845	2.741	3.96222
Table to Create Stocks
Wanted Density	Ratio from formula	Wanted initial H2O volume	SPT to add
2.15	2.04597	10	20.4597
2.2	2.17428	10	21.7428
2.25	2.30789	10	23.0789
2.3	2.4471	10	24.4709
2.35	2.59218	10	25.9218
2.4	2.74344	10	27.4344
2.45	2.90116	10	29.0116
